# Supplementary material for: Long-read subcellular fractionation and sequencing reveals the translational fate of full-length mRNA isoforms during neuronal differentiation
Source: HighWire-hosted journal article supplement (doi:10.1101/gr.279170.124), 2024-06-05
Supplement: Supplemental_Tables.xlsx [file Supplemental_Tables.xlsx]

## Sheet: Supp_table_legend
supp_table_number	supp_table	column_name	column_definition
1	SR_library_stats	sample	sample name
1	SR_library_stats	input_reads	number of raw input reads
1	SR_library_stats	STAR_map_percent	STAR v2.7.8a mapping to the genome, uniquely mapped reads %
1	SR_library_stats	Salmon_map_percent	Salmon v1.9.0 alignment of reads to the transcriptome, uniquely mapped reads %
2	LR_library_stats	sample	sample name
2	LR_library_stats	reads	number of raw input reads
2	LR_library_stats	mapped_percent	minimap2 v2.24 mapping to the genome, uniquely mapped reads %
3	transcriptome_features	gene	gene symbol
3	transcriptome_features	txID	transcript ID
3	transcriptome_features	structural_category	SQANTI3-defined structural category
3	transcriptome_features	coding	presence of a complete open reading frame (1 = yes/coding, 0 = no/noncoding)
3	transcriptome_features	NMD	presence of a premature termination codon (1 = yes/NMD, 0 = no)
3	transcriptome_features	RI	presence of a retained intron (1 = yes, 0 = no)
3	transcriptome_features	tx_len	transcript length
3	transcriptome_features	cds_len	coding sequence length
3	transcriptome_features	utr5_len	5’UTR length
3	transcriptome_features	utr3_len	3’UTR length
3	transcriptome_features	tx_GC	transcript GC-content
3	transcriptome_features	CDS_GC	coding sequence GC-content
3	transcriptome_features	UTR5_GC	5’UTR GC-content
3	transcriptome_features	UTR3_GC	3’UTR GC-content
3	transcriptome_features	AAA	codon frequency (number of occurrences / number of codons in the coding sequence)
3	transcriptome_features	AAC	codon frequency (number of occurrences / number of codons in the coding sequence)
3	transcriptome_features	AAG	codon frequency (number of occurrences / number of codons in the coding sequence)
3	transcriptome_features	AAT	codon frequency (number of occurrences / number of codons in the coding sequence)
3	transcriptome_features	ACA	codon frequency (number of occurrences / number of codons in the coding sequence)
3	transcriptome_features	ACC	codon frequency (number of occurrences / number of codons in the coding sequence)
3	transcriptome_features	ACG	codon frequency (number of occurrences / number of codons in the coding sequence)
3	transcriptome_features	ACT	codon frequency (number of occurrences / number of codons in the coding sequence)
3	transcriptome_features	AGA	codon frequency (number of occurrences / number of codons in the coding sequence)
3	transcriptome_features	AGC	codon frequency (number of occurrences / number of codons in the coding sequence)
3	transcriptome_features	AGG	codon frequency (number of occurrences / number of codons in the coding sequence)
3	transcriptome_features	AGT	codon frequency (number of occurrences / number of codons in the coding sequence)
3	transcriptome_features	ATA	codon frequency (number of occurrences / number of codons in the coding sequence)
3	transcriptome_features	ATC	codon frequency (number of occurrences / number of codons in the coding sequence)
3	transcriptome_features	ATG	codon frequency (number of occurrences / number of codons in the coding sequence)
3	transcriptome_features	ATT	codon frequency (number of occurrences / number of codons in the coding sequence)
3	transcriptome_features	CAA	codon frequency (number of occurrences / number of codons in the coding sequence)
3	transcriptome_features	CAC	codon frequency (number of occurrences / number of codons in the coding sequence)
3	transcriptome_features	CAG	codon frequency (number of occurrences / number of codons in the coding sequence)
3	transcriptome_features	CAT	codon frequency (number of occurrences / number of codons in the coding sequence)
3	transcriptome_features	CCA	codon frequency (number of occurrences / number of codons in the coding sequence)
3	transcriptome_features	CCC	codon frequency (number of occurrences / number of codons in the coding sequence)
3	transcriptome_features	CCG	codon frequency (number of occurrences / number of codons in the coding sequence)
3	transcriptome_features	CCT	codon frequency (number of occurrences / number of codons in the coding sequence)
3	transcriptome_features	CGA	codon frequency (number of occurrences / number of codons in the coding sequence)
3	transcriptome_features	CGC	codon frequency (number of occurrences / number of codons in the coding sequence)
3	transcriptome_features	CGG	codon frequency (number of occurrences / number of codons in the coding sequence)
3	transcriptome_features	CGT	codon frequency (number of occurrences / number of codons in the coding sequence)
3	transcriptome_features	CTA	codon frequency (number of occurrences / number of codons in the coding sequence)
3	transcriptome_features	CTC	codon frequency (number of occurrences / number of codons in the coding sequence)
3	transcriptome_features	CTG	codon frequency (number of occurrences / number of codons in the coding sequence)
3	transcriptome_features	CTT	codon frequency (number of occurrences / number of codons in the coding sequence)
3	transcriptome_features	GAA	codon frequency (number of occurrences / number of codons in the coding sequence)
3	transcriptome_features	GAC	codon frequency (number of occurrences / number of codons in the coding sequence)
3	transcriptome_features	GAG	codon frequency (number of occurrences / number of codons in the coding sequence)
3	transcriptome_features	GAT	codon frequency (number of occurrences / number of codons in the coding sequence)
3	transcriptome_features	GCA	codon frequency (number of occurrences / number of codons in the coding sequence)
3	transcriptome_features	GCC	codon frequency (number of occurrences / number of codons in the coding sequence)
3	transcriptome_features	GCG	codon frequency (number of occurrences / number of codons in the coding sequence)
3	transcriptome_features	GCT	codon frequency (number of occurrences / number of codons in the coding sequence)
3	transcriptome_features	GGA	codon frequency (number of occurrences / number of codons in the coding sequence)
3	transcriptome_features	GGC	codon frequency (number of occurrences / number of codons in the coding sequence)
3	transcriptome_features	GGG	codon frequency (number of occurrences / number of codons in the coding sequence)
3	transcriptome_features	GGT	codon frequency (number of occurrences / number of codons in the coding sequence)
3	transcriptome_features	GTA	codon frequency (number of occurrences / number of codons in the coding sequence)
3	transcriptome_features	GTC	codon frequency (number of occurrences / number of codons in the coding sequence)
3	transcriptome_features	GTG	codon frequency (number of occurrences / number of codons in the coding sequence)
3	transcriptome_features	GTT	codon frequency (number of occurrences / number of codons in the coding sequence)
3	transcriptome_features	TAA	codon frequency (number of occurrences / number of codons in the coding sequence)
3	transcriptome_features	TAC	codon frequency (number of occurrences / number of codons in the coding sequence)
3	transcriptome_features	TAG	codon frequency (number of occurrences / number of codons in the coding sequence)
3	transcriptome_features	TAT	codon frequency (number of occurrences / number of codons in the coding sequence)
3	transcriptome_features	TCA	codon frequency (number of occurrences / number of codons in the coding sequence)
3	transcriptome_features	TCC	codon frequency (number of occurrences / number of codons in the coding sequence)
3	transcriptome_features	TCG	codon frequency (number of occurrences / number of codons in the coding sequence)
3	transcriptome_features	TCT	codon frequency (number of occurrences / number of codons in the coding sequence)
3	transcriptome_features	TGA	codon frequency (number of occurrences / number of codons in the coding sequence)
3	transcriptome_features	TGC	codon frequency (number of occurrences / number of codons in the coding sequence)
3	transcriptome_features	TGG	codon frequency (number of occurrences / number of codons in the coding sequence)
3	transcriptome_features	TGT	codon frequency (number of occurrences / number of codons in the coding sequence)
3	transcriptome_features	TTA	codon frequency (number of occurrences / number of codons in the coding sequence)
3	transcriptome_features	TTC	codon frequency (number of occurrences / number of codons in the coding sequence)
3	transcriptome_features	TTG	codon frequency (number of occurrences / number of codons in the coding sequence)
3	transcriptome_features	TTT	codon frequency (number of occurrences / number of codons in the coding sequence)
3	transcriptome_features	exons	number of exons in transcript
3	transcriptome_features	utr5_TOP	number of 5’UTR TOP binding motifs
3	transcriptome_features	utr5_UNR_BS	number of 5’UTR UNR_BS motifs
3	transcriptome_features	utr3_BRD_BOX	number of 3’UTR BRD-BOX motifs
3	transcriptome_features	utr3_CPE	number of 3’UTR CPE motifs
3	transcriptome_features	utr3_DMRT1_RE	number of 3’UTR DMRT1 motifs
3	transcriptome_features	utr3_GY_BOX	number of 3’UTR GY-BOX motifs
3	transcriptome_features	utr3_K_BOX	number of 3’UTR K-BOX motifs
3	transcriptome_features	utr3_MBE	number of 3’UTR MBE motifs
3	transcriptome_features	utr3_UNR_BS	number of 3’UTR UNR_BS motifs
3	transcriptome_features	DNA_hAT_Charlie	number of DNA/hAT-Charlie repeat sequences
3	transcriptome_features	DNA_TcMar_Tigger	number of DNA/TcMar-Tigger repeat sequences
3	transcriptome_features	LINE_L1	number of LINE/L1 repeat sequences
3	transcriptome_features	LINE_L2	number of LINE/L2 repeat sequences
3	transcriptome_features	Low_complexity	number of low complexity repeat sequences
3	transcriptome_features	LTR_ERVL_MaLR	number of LTR/ERVL-MaLR repeat sequences
3	transcriptome_features	Retroposon_SVA	number of Retroposon/SVA repeat sequences
3	transcriptome_features	Simple_repeat	number of simple repeat sequences
3	transcriptome_features	SINE_Alu	number of SINE/Alu repeat sequences
3	transcriptome_features	SINE_MIR	number of SINE/MIR repeat sequences
3	transcriptome_features	srpRNA	number of srpRNA repeat sequences
3	transcriptome_features	n_uORFs	number of upstream open reading frames
3	transcriptome_features	total_uORF_len	the sum of upstream open reading frame lengths
4	ESC_DTE (differential transcript expression)	gene	gene symbol
4	ESC_DTE (differential transcript expression)	txID	transcript ID
4	ESC_DTE (differential transcript expression)	cluster	subcellular fraction association
4	ESC_DTE (differential transcript expression)	pval	P-value
4	ESC_DTE (differential transcript expression)	R2	coefficient of determination
4	ESC_DTE (differential transcript expression)	cyto	mean normalized expression in the cytosol
4	ESC_DTE (differential transcript expression)	mono	mean normalized expression in the monosome (Mono)
4	ESC_DTE (differential transcript expression)	poll	mean normalized expression in the light polyribosome fraction (LPR)
4	ESC_DTE (differential transcript expression)	polh	mean normalized expression in the heavy polyribosome fraction (HPR)
4	ESC_DTE (differential transcript expression)	mono_L2FC	Mono log2(fold change) of expression relative to the cytosol
4	ESC_DTE (differential transcript expression)	poll_L2FC	LPR log2(fold change) of expression relative to the cytosol
4	ESC_DTE (differential transcript expression)	polh_L2FC	HPR log2(fold change) of expression relative to the cytosol
4	ESC_DTE (differential transcript expression)	mono_sig	significance of differential expression in Mono vs. cytosol (1 = upregulated, 0 = insignificant, -1 = downregulated)
4	ESC_DTE (differential transcript expression)	poll_sig	significance of differential expression in LPR vs. cytosol (1 = upregulated, 0 = insignificant, -1 = downregulated)
4	ESC_DTE (differential transcript expression)	polh_sig	significance of differential expression in HPR vs. cytosol (1 = upregulated, 0 = insignificant, -1 = downregulated)
5	NPC_DTE (differential transcript expression)	gene	gene symbol
5	NPC_DTE (differential transcript expression)	txID	transcript ID
5	NPC_DTE (differential transcript expression)	cluster	subcellular fraction association
5	NPC_DTE (differential transcript expression)	pval	P-value
5	NPC_DTE (differential transcript expression)	R2	coefficient of determination
5	NPC_DTE (differential transcript expression)	cyto	mean normalized expression in the cytosol
5	NPC_DTE (differential transcript expression)	mono	mean normalized expression in the monosome (Mono)
5	NPC_DTE (differential transcript expression)	poll	mean normalized expression in the light polyribosome fraction (LPR)
5	NPC_DTE (differential transcript expression)	polh	mean normalized expression in the heavy polyribosome fraction (HPR)
5	NPC_DTE (differential transcript expression)	mono_L2FC	Mono log2(fold change) of expression relative to the cytosol
5	NPC_DTE (differential transcript expression)	poll_L2FC	LPR log2(fold change) of expression relative to the cytosol
5	NPC_DTE (differential transcript expression)	polh_L2FC	HPR log2(fold change) of expression relative to the cytosol
5	NPC_DTE (differential transcript expression)	mono_sig	significance of differential expression in Mono vs. cytosol (1 = upregulated, 0 = insignificant, -1 = downregulated)
5	NPC_DTE (differential transcript expression)	poll_sig	significance of differential expression in LPR vs. cytosol (1 = upregulated, 0 = insignificant, -1 = downregulated)
5	NPC_DTE (differential transcript expression)	polh_sig	significance of differential expression in HPR vs. cytosol (1 = upregulated, 0 = insignificant, -1 = downregulated)
6	ESC_DIU (differential isoform usage/sedimentation)	gene	gene symbol
6	ESC_DIU (differential isoform usage/sedimentation)	txID	transcript ID
6	ESC_DIU (differential isoform usage/sedimentation)	cyto_gf	gene fraction of the isoform in cytosol
6	ESC_DIU (differential isoform usage/sedimentation)	mono_gf	gene fraction of the isoform in Mono
6	ESC_DIU (differential isoform usage/sedimentation)	poll_gf	gene fraction of the isoform in LPR
6	ESC_DIU (differential isoform usage/sedimentation)	polh_gf	gene fraction of the isoform in HPR
6	ESC_DIU (differential isoform usage/sedimentation)	mono_dgf	change in isoform gene fraction in Mono relative to cytosol
6	ESC_DIU (differential isoform usage/sedimentation)	poll_dgf	change in isoform gene fraction in LPR relative to cytosol
6	ESC_DIU (differential isoform usage/sedimentation)	polh_dgf	change in isoform gene fraction in HPR relative to cytosol
6	ESC_DIU (differential isoform usage/sedimentation)	Qval	positive false discovery rate
6	ESC_DIU (differential isoform usage/sedimentation)	mono_sig	significance of differential isoform sedimentation in Mono vs. cytosol (1 = increased, 0 = insignificant, -1 = decreased)
6	ESC_DIU (differential isoform usage/sedimentation)	poll_sig	significance of differential isoform sedimentation in LPR vs. cytosol (1 = increased, 0 = insignificant, -1 = decreased)
6	ESC_DIU (differential isoform usage/sedimentation)	polh_sig	significance of differential isoform sedimentation in HPR vs. cytosol (1 = increased, 0 = insignificant, -1 = decreased)
7	NPC_DIU (differential isoform usage/sedimentation)	gene	gene symbol
7	NPC_DIU (differential isoform usage/sedimentation)	txID	transcript ID
7	NPC_DIU (differential isoform usage/sedimentation)	cyto_gf	gene fraction of the isoform in cytosol
7	NPC_DIU (differential isoform usage/sedimentation)	mono_gf	gene fraction of the isoform in Mono
7	NPC_DIU (differential isoform usage/sedimentation)	poll_gf	gene fraction of the isoform in LPR
7	NPC_DIU (differential isoform usage/sedimentation)	polh_gf	gene fraction of the isoform in HPR
7	NPC_DIU (differential isoform usage/sedimentation)	mono_dgf	change in isoform gene fraction in Mono relative to cytosol
7	NPC_DIU (differential isoform usage/sedimentation)	poll_dgf	change in isoform gene fraction in LPR relative to cytosol
7	NPC_DIU (differential isoform usage/sedimentation)	polh_dgf	change in isoform gene fraction in HPR relative to cytosol
7	NPC_DIU (differential isoform usage/sedimentation)	Qval	positive false discovery rate
7	NPC_DIU (differential isoform usage/sedimentation)	mono_sig	significance of differential isoform sedimentation in Mono vs. cytosol (1 = increased, 0 = insignificant, -1 = decreased)
7	NPC_DIU (differential isoform usage/sedimentation)	poll_sig	significance of differential isoform sedimentation in LPR vs. cytosol (1 = increased, 0 = insignificant, -1 = decreased)
7	NPC_DIU (differential isoform usage/sedimentation)	polh_sig	significance of differential isoform sedimentation in HPR vs. cytosol (1 = increased, 0 = insignificant, -1 = decreased)
8	ESC_AS	gene	gene symbol
8	ESC_AS	event_id	junctionCounts alternative splicing event ID
8	ESC_AS	event_type	junctionCounts alternative splicing event type
8	ESC_AS	chr	chromosome
8	ESC_AS	start	alternative splicing event start coordinate
8	ESC_AS	end	alternative splicing event end coordinate
8	ESC_AS	strand	strand
8	ESC_AS	cyto_mean_psi	mean percent spliced in (PSI) in cytosol
8	ESC_AS	mono_mean_psi	mean percent spliced in (PSI) in Mono
8	ESC_AS	poll_mean_psi	mean percent spliced in (PSI) in LPR
8	ESC_AS	polh_mean_psi	mean percent spliced in (PSI) in HPR
8	ESC_AS	mono_dpsi	mean change in PSI in Mono relative to cytosol
8	ESC_AS	poll_dpsi	mean change in PSI in LPR relative to cytosol
8	ESC_AS	polh_dpsi	mean change in PSI in HPR relative to cytosol
8	ESC_AS	mono_qval	positive false discovery rate of the event difference between Mono and cytosol
8	ESC_AS	poll_qval	positive false discovery rate of the event difference between LPR and cytosol
8	ESC_AS	polh_qval	positive false discovery rate of the event difference between HPR and cytosol
8	ESC_AS	mono_sig	significance of change in PSI in Mono vs. cytosol (1 = increased, 0 = insignificant, -1 = decreased)
8	ESC_AS	poll_sig	significance of change in PSI in LPR vs. cytosol (1 = increased, 0 = insignificant, -1 = decreased)
8	ESC_AS	polh_sig	significance of change in PSI in HPR vs. cytosol (1 = increased, 0 = insignificant, -1 = decreased)
8	ESC_AS	n_sig	total significant events across all subcellular fraction comparisons vs. cytosol
8	ESC_AS	nmd_switch	whether or not the event is predicted to induce NMD
8	ESC_AS	nmd_form	which form (excluded or included) is predicted to be the NMD form if nmd_switch = always/sometimes
8	ESC_AS	status	class of AS event: AS = not different in fractions, ASTC = significantly different in fractions, NMD = always NMD-inducing but different in fractions, ASTC+NMD = NMD and different in fractions
9	NPC_AS	gene	gene symbol
9	NPC_AS	event_id	junctionCounts alternative splicing event ID
9	NPC_AS	event_type	junctionCounts alternative splicing event type
9	NPC_AS	chr	chromosome
9	NPC_AS	start	alternative splicing event start coordinate
9	NPC_AS	end	alternative splicing event end coordinate
9	NPC_AS	strand	strand
9	NPC_AS	cyto_mean_psi	mean percent spliced in (PSI) in cytosol
9	NPC_AS	mono_mean_psi	mean percent spliced in (PSI) in Mono
9	NPC_AS	poll_mean_psi	mean percent spliced in (PSI) in LPR
9	NPC_AS	polh_mean_psi	mean percent spliced in (PSI) in HPR
9	NPC_AS	mono_dpsi	mean change in PSI in Mono relative to cytosol
9	NPC_AS	poll_dpsi	mean change in PSI in LPR relative to cytosol
9	NPC_AS	polh_dpsi	mean change in PSI in HPR relative to cytosol
9	NPC_AS	mono_qval	positive false discovery rate of the event difference between Mono and cytosol
9	NPC_AS	poll_qval	positive false discovery rate of the event difference between LPR and cytosol
9	NPC_AS	polh_qval	positive false discovery rate of the event difference between HPR and cytosol
9	NPC_AS	mono_sig	significance of change in PSI in Mono vs. cytosol (1 = increased, 0 = insignificant, -1 = decreased)
9	NPC_AS	poll_sig	significance of change in PSI in LPR vs. cytosol (1 = increased, 0 = insignificant, -1 = decreased)
9	NPC_AS	polh_sig	significance of change in PSI in HPR vs. cytosol (1 = increased, 0 = insignificant, -1 = decreased)
9	NPC_AS	n_sig	total significant events across all subcellular fraction comparisons vs. cytosol
9	NPC_AS	nmd_switch	whether or not the event is predicted to induce NMD
9	NPC_AS	nmd_form	which form (excluded or included) is predicted to be the NMD form if nmd_switch = always/sometimes
9	NPC_AS	status	class of AS event: AS = not different in fractions, ASTC = significantly different in fractions, NMD = always NMD-inducing but different in fractions, ASTC+NMD = NMD and different in fractions
10	FASE_motif	RBP	RNA-binding protein or de novo motif consensus sequence
10	FASE_motif	consensus	motif sequence signature
10	FASE_motif	esc_mono_enr	SEA-derived enrichment ratio in target vs. background (ESC Mono vs. cytosol FASE set)
10	FASE_motif	npc_mono_enr	SEA-derived enrichment ratio in target vs. background (NPC Mono vs. cytosol FASE set)
10	FASE_motif	esc_poll_enr	SEA-derived enrichment ratio in target vs. background (ESC LPR vs. cytosol FASE set)
10	FASE_motif	npc_poll_enr	SEA-derived enrichment ratio in target vs. background (NPC LPR vs. cytosol FASE set)
10	FASE_motif	esc_HvM_enr	SEA-derived enrichment ratio in target vs. background (ESC HPR vs. Mono FASE set)
10	FASE_motif	npc_HvM_enr	SEA-derived enrichment ratio in target vs. background (NPC HPR vs. Mono FASE set)
10	FASE_motif	esc_HvL_enr	SEA-derived enrichment ratio in target vs. background (ESC HPR vs. LPR FASE set)
10	FASE_motif	npc_HvL_enr	SEA-derived enrichment ratio in target vs. background (NPC HPR vs. LPR FASE set)
11	divergentDIU_motif	RBP	RNA-binding protein or de novo motif consensus sequence
11	divergentDIU_motif	consensus	motif sequence signature
11	divergentDIU_motif	esc_mono_cds_enr	SEA-derived enrichment ratio in target vs. background (ESC Mono coding sequence set)
11	divergentDIU_motif	esc_mono_utr3_enr	SEA-derived enrichment ratio in target vs. background (ESC Mono 3’UTR set)
11	divergentDIU_motif	esc_mono_utr5_enr	SEA-derived enrichment ratio in target vs. background (ESC Mono 5’UTR set)
11	divergentDIU_motif	esc_poll_cds_enr	SEA-derived enrichment ratio in target vs. background (ESC LPR coding sequence set)
11	divergentDIU_motif	esc_poll_utr3_enr	SEA-derived enrichment ratio in target vs. background (ESC LPR 3’UTR set)
11	divergentDIU_motif	esc_poll_utr5_enr	SEA-derived enrichment ratio in target vs. background (ESC LPR 5’UTR set)
11	divergentDIU_motif	esc_polh_cds_enr	SEA-derived enrichment ratio in target vs. background (ESC HPR coding sequence set)
11	divergentDIU_motif	esc_polh_utr3_enr	SEA-derived enrichment ratio in target vs. background (ESC HPR 3’UTR set)
11	divergentDIU_motif	esc_polh_utr5_enr	SEA-derived enrichment ratio in target vs. background (ESC HPR 5’UTR set)
11	divergentDIU_motif	npc_mono_cds_enr	SEA-derived enrichment ratio in target vs. background (NPC Mono coding sequence set)
11	divergentDIU_motif	npc_mono_utr3_enr	SEA-derived enrichment ratio in target vs. background (NPC Mono 3’UTR set)
11	divergentDIU_motif	npc_mono_utr5_enr	SEA-derived enrichment ratio in target vs. background (NPC Mono 5’UTR set)
11	divergentDIU_motif	npc_poll_cds_enr	SEA-derived enrichment ratio in target vs. background (NPC LPR coding sequence set)
11	divergentDIU_motif	npc_poll_utr3_enr	SEA-derived enrichment ratio in target vs. background (NPC LPR 3’UTR set)
11	divergentDIU_motif	npc_poll_utr5_enr	SEA-derived enrichment ratio in target vs. background (NPC LPR 5’UTR set)
11	divergentDIU_motif	npc_polh_cds_enr	SEA-derived enrichment ratio in target vs. background (NPC HPR coding sequence set)
11	divergentDIU_motif	npc_polh_utr3_enr	SEA-derived enrichment ratio in target vs. background (NPC HPR 3’UTR set)
11	divergentDIU_motif	npc_polh_utr5_enr	SEA-derived enrichment ratio in target vs. background (NPC HPR 5’UTR set)

## Sheet: S1.SR_library_stats
sample	input_reads	STAR_map_percent	Salmon_map_percent_to_LR_transcriptome	Salmon_map_percent_to_comprehensive_transcriptome
h9esc_cyto_jd004	65538373	87.7	45.5811	72.926
h9esc_cyto_jd005	75544805	86.52	41.8056	70.8956
h9esc_cyto_jd020	96079525	91.52	44.1754	75.6028
h9esc_mono_jd006	71303313	81.22	32.011	65.8012
h9esc_mono_jd007	63293866	77.39	26.9565	62.5463
h9esc_mono_jd021	109901152	78.29	26.2807	60.4127
h9esc_polh_jd008	73844802	89.59	51.9681	75.2561
h9esc_polh_jd009	74139315	92.55	51.1342	79.5265
h9esc_polh_jd022	93099857	89.2	49.2317	74.7781
h9esc_poll_jd010	66159743	88.6	43.0972	68.7752
h9esc_poll_jd011	64503812	90.29	45.0499	70.7408
h9esc_poll_jd023	52424667	87.2	36.6629	63.1582
h9npc_cyto_jd012	60157656	92.15	45.1312	77.8924
h9npc_cyto_jd013	57302477	94.1	45.0502	78.918
h9npc_cyto_jd024	61029651	91.3	47.8923	77.8267
h9npc_mono_jd014	63391977	81.98	33.912	71.5276
h9npc_mono_jd015	63601408	84.4	40.3771	72.5431
h9npc_mono_jd025	94654389	87.74	43.2223	75.3578
h9npc_polh_jd016	67150717	90.97	46.9869	77.7476
h9npc_polh_jd017	76023085	81.05	41.9958	68.9536
h9npc_polh_jd026	40697697	92.06	41.9715	73.3546
h9npc_poll_jd018	79562733	91.47	41.5863	73.5578
h9npc_poll_jd019	83933696	81.2	36.4773	65.7853
h9npc_poll_jd027	64792025	89.81	40.5211	70.9456

## Sheet: S2.LR_library_stats
sample	reads	mapped_percent
ESC_Cyto_1	414904	99.7
ESC_Cyto_2	413358	99.99
ESC_Mono_1	221106	99.93
ESC_Mono_2	704637	99.99
ESC_Light_1	624403	99.99
ESC_Light_2	519689	99.99
ESC_Heavy_1	748310	99.99
ESC_Heavy_2	454091	100
NPC_Cyto_1	539420	99.99
NPC_Cyto_2	268303	99.99
NPC_Mono_1	593012	99.99
NPC_Mono_2	656410	99.99
NPC_Light_1	319173	99.99
NPC_Light_2	379035	99.99
NPC_Heavy_1	601644	100
NPC_Heavy_2	458925	100

## Sheet: S3.transcriptome_features
gene	txID	structural_category	coding	NMD	RI	tx_len	cds_len	utr5_len	utr3_len	tx_GC	CDS_GC	UTR5_GC	UTR3_GC	AAA	AAC	AAG	AAT	ACA	ACC	ACG	ACT	AGA	AGC	AGG	AGT	ATA	ATC	ATG	ATT	CAA	CAC	CAG	CAT	CCA	CCC	CCG	CCT	CGA	CGC	CGG	CGT	CTA	CTC	CTG	CTT	GAA	GAC	GAG	GAT
ESRRA	ENST00000000442.11	full-splice_match	1	0	0	2274	1269	225	780	0.638083	0.649054	0.774336	0.580769	0.00947867	0.007109	0.0616114	0.00473934	0.0236967	0.035545	0.014218	0.028436	0.049763	0.0829384	0.0805687	0.0331754	0	0.0236967	0.0450237	0.00947867	0.042654	0.0379147	0.0805687	0.035545	0.0734597	0.0663507	0.0450237	0.0947867	0.0260664	0.035545	0.0616114	0.00947867	0.0236967	0.0592417	0.154028	0.028436	0.028436	0.0402844	0.0995261	0.0260664
FKBP4	ENST00000001008.6	full-splice_match	1	0	0	3715	1377	170	2168	0.509825	0.53125	0.777778	0.475092	0.0393013	0.0349345	0.111354	0.0349345	0.0655022	0.0393013	0.0152838	0.0327511	0.0960699	0.0720524	0.10917	0.0371179	0.0196507	0.0327511	0.0524017	0.0305677	0.0720524	0.0458515	0.0829694	0.0414847	0.080786	0.0327511	0.0240175	0.0414847	0.0196507	0.0240175	0.0283843	0.010917	0.0305677	0.0349345	0.0720524	0.0393013	0.0982533	0.0436681	0.106987	0.0327511
CYP26B1	ENST00000001146.7	full-splice_match	1	0	0	4556	1536	28	2992	0.562116	0.63127	0.689655	0.525401	0.00391389	0.0156556	0.0547945	0.00391389	0.0293542	0.0704501	0.037182	0.0215264	0.0450098	0.0802348	0.0606654	0.0234834	0.00391389	0.0450098	0.037182	0.0136986	0.0489237	0.0665362	0.072407	0.0567515	0.0821918	0.0489237	0.0567515	0.0782779	0.0254403	0.072407	0.0606654	0.0332681	0.0136986	0.0391389	0.129159	0.0430528	0.0254403	0.0567515	0.074364	0.0332681
SEMA3F	ENST00000002829.8	full-splice_match	1	0	0	3607	2355	289	963	0.617411	0.615548	0.782759	0.57217	0.00637755	0.0357143	0.0357143	0.00765306	0.0408163	0.067602	0.0395408	0.0433673	0.0306122	0.0663265	0.0727041	0.0255102	0.00510204	0.0306122	0.0535714	0.0178571	0.0446429	0.0688776	0.0956633	0.0497449	0.0969388	0.0765306	0.0752551	0.0701531	0.0293367	0.0586735	0.0522959	0.0395408	0.0229592	0.0586735	0.0829082	0.0471939	0.0293367	0.0484694	0.0612245	0.0331633
CFTR	ENST00000003084.11	full-splice_match	1	0	0	6070	4440	70	1560	0.409061	0.415409	0.619718	0.38141	0.0696416	0.0574713	0.081812	0.0642326	0.0696416	0.0277214	0.00946586	0.056119	0.0878972	0.0500338	0.0453009	0.045977	0.0473293	0.040568	0.0534145	0.07167	0.0703178	0.0344828	0.0669371	0.0466531	0.0432725	0.0121704	0.00676133	0.0486815	0.015551	0.00676133	0.00811359	0.00811359	0.030426	0.045977	0.0669371	0.0703178	0.0946586	0.0344828	0.0480054	0.0594997
CYP51A1	ENST00000003100.13	full-splice_match	1	0	0	3155	1527	113	1515	0.41046	0.443644	0.622807	0.361056	0.0708661	0.0413386	0.0590551	0.0590551	0.0551181	0.0314961	0.00984252	0.0511811	0.0708661	0.0393701	0.0472441	0.0393701	0.0393701	0.0413386	0.0807087	0.0590551	0.0472441	0.0216535	0.0787402	0.0610236	0.0551181	0.0177165	0.00984252	0.0629921	0.00590551	0.019685	0.015748	0.011811	0.0374016	0.0433071	0.0728346	0.0610236	0.0767717	0.0393701	0.0295276	0.0570866
USP28	ENST00000003302.8	full-splice_match	1	0	0	4669	3231	69	1369	0.436068	0.450774	0.8	0.382761	0.0687732	0.0399628	0.0845725	0.0613383	0.052974	0.0343866	0.010223	0.045539	0.0743494	0.0585502	0.0548327	0.0576208	0.0260223	0.045539	0.0771375	0.0539033	0.0669145	0.0269517	0.0780669	0.0464684	0.0483271	0.0306691	0.0157993	0.0566914	0.0185874	0.00929368	0.0157993	0.00929368	0.0362454	0.0492565	0.0752788	0.0566914	0.0901487	0.0399628	0.0659851	0.0501859
SLC7A2	ENST00000004531.14	full-splice_match	1	0	0	7560	2094	48	5418	0.406878	0.482083	0.44898	0.377446	0.0387374	0.0301291	0.0487805	0.045911	0.0387374	0.0373027	0.0157819	0.0315638	0.0559541	0.0530846	0.025825	0.0387374	0.0200861	0.0430416	0.0674319	0.0530846	0.0502152	0.0329986	0.071736	0.0516499	0.0559541	0.0315638	0.0143472	0.0746055	0.0129125	0.0129125	0.0186514	0.0315638	0.0215208	0.0473458	0.0803443	0.0903874	0.0602582	0.0373027	0.035868	0.0401722
HSPB6	ENST00000004982.6	full-splice_match	1	0	0	1460	480	21	959	0.627397	0.716075	0.636364	0.582899	0.00628931	0.00628931	0.0188679	0.00628931	0.00628931	0.0566038	0.0566038	0.0251572	0.0125786	0.0628931	0.0628931	0.00628931	0	0.0188679	0.00628931	0.0125786	0.0125786	0.0754717	0.0566038	0.00628931	0.0943396	0.0880503	0.132075	0.0566038	0.0440252	0.150943	0.081761	0.081761	0.0251572	0.0314465	0.106918	0.0377358	0.0188679	0.0440252	0.0691824	0.0251572
CCL26	ENST00000005180.9	full-splice_match	1	0	0	475	282	35	158	0.517895	0.508897	0.527778	0.531646	0.0752688	0.0430108	0.0752688	0.0537634	0.0752688	0.0645161	0.0107527	0.0430108	0.0322581	0.0537634	0.0215054	0.0430108	0.0430108	0.0215054	0.0322581	0.0430108	0.0860215	0.0537634	0.0430108	0.0322581	0.107527	0.0537634	0.0107527	0.129032	0.0215054	0	0.0107527	0.0107527	0.0215054	0.0860215	0.139785	0.0537634	0.0752688	0.0322581	0.0322581	0.0215054
TMEM132A	ENST00000005286.8	full-splice_match	1	0	0	3480	3072	153	255	0.672701	0.672419	0.805195	0.596078	0.00684262	0.0146628	0.0254154	0.00488759	0.0342131	0.0596285	0.0215054	0.0361681	0.0254154	0.085044	0.0801564	0.028348	0.00195503	0.0185728	0.0205279	0.00391007	0.0224829	0.0684262	0.0889541	0.0244379	0.086999	0.100684	0.0635386	0.104594	0.0224829	0.0518084	0.0508309	0.0293255	0.0185728	0.0645161	0.14174	0.0312805	0.0215054	0.0449658	0.0928641	0.0107527
GGCT	ENST00000005374.10	full-splice_match	1	0	0	1032	342	132	558	0.438953	0.489736	0.669173	0.353047	0.0707965	0.0530973	0.079646	0.0530973	0.0265487	0.0353982	0.0265487	0.0353982	0.0530973	0.0353982	0.0530973	0.0707965	0.00884956	0.0176991	0.0707965	0.0619469	0.106195	0.0265487	0.0442478	0.0265487	0.0530973	0.0265487	0.0265487	0.0530973	0.0176991	0.0176991	0.0442478	0.0176991	0.00884956	0.0353982	0.079646	0.0442478	0.0619469	0.0265487	0.0707965	0.0530973
IFRD1	ENST00000005558.8	full-splice_match	1	0	0	1834	1353	470	11	0.454744	0.438609	0.505308	0.272727	0.0733333	0.0577778	0.0888889	0.0622222	0.0422222	0.0311111	0.0177778	0.0511111	0.0755556	0.0711111	0.0422222	0.0466667	0.0333333	0.0288889	0.0822222	0.06	0.0577778	0.0288889	0.0777778	0.0377778	0.04	0.0111111	0.00888889	0.0466667	0.0244444	0.0133333	0.0222222	0.00666667	0.0288889	0.0333333	0.0577778	0.0755556	0.111111	0.04	0.0511111	0.0622222
CX3CL1	ENST00000006053.7	full-splice_match	1	0	0	3285	1191	79	2015	0.598782	0.636975	0.7125	0.571712	0.020202	0.020202	0.0378788	0.0176768	0.0277778	0.0631313	0.0353535	0.0252525	0.0530303	0.0707071	0.0934343	0.0151515	0.00757576	0.0353535	0.0454545	0.00252525	0.0277778	0.0580808	0.111111	0.0378788	0.108586	0.0833333	0.0505051	0.0959596	0.0429293	0.0252525	0.0328283	0.0328283	0.0126263	0.0707071	0.121212	0.0378788	0.040404	0.0631313	0.0782828	0.0252525
PRR5	ENST00000006251.11	full-splice_match	1	0	0	1767	1137	194	436	0.645161	0.662852	0.625641	0.607798	0.00529101	0.0238095	0.0343915	0.0026455	0.0238095	0.0608466	0.037037	0.0343915	0.0502646	0.0714286	0.0661376	0.021164	0.0026455	0.0291005	0.026455	0.0132275	0.0291005	0.0449735	0.103175	0.0396825	0.0846561	0.0820106	0.0846561	0.0873016	0.0238095	0.0740741	0.0740741	0.0291005	0.015873	0.0608466	0.119048	0.0449735	0.031746	0.0634921	0.0714286	0.026455
CD79B	ENST00000006750.8	full-splice_match	1	0	0	1246	687	70	489	0.597913	0.571429	0.591549	0.635992	0.0175439	0.0263158	0.0614035	0.0263158	0.0657895	0.0526316	0.0394737	0.0131579	0.0526316	0.0921053	0.0921053	0.0350877	0.00877193	0.0745614	0.0570175	0.00877193	0.0350877	0.0614035	0.122807	0.0657895	0.0877193	0.0307018	0.0219298	0.0482456	0.0175439	0.0307018	0.0482456	0.0175439	0.0263158	0.0350877	0.118421	0.0263158	0.0789474	0.0526316	0.0745614	0.0438596
OSBPL7	ENST00000007414.8	full-splice_match	1	0	0	3664	2526	216	922	0.610262	0.605545	0.654378	0.612798	0.020214	0.039239	0.0523187	0.0142687	0.0558859	0.0749108	0.019025	0.0309156	0.0535077	0.078478	0.0772889	0.0380499	0.00713436	0.0297265	0.0404281	0.00951249	0.0570749	0.0618312	0.098692	0.0428062	0.0903686	0.0570749	0.0428062	0.0927467	0.0321046	0.0404281	0.039239	0.0130797	0.0178359	0.078478	0.11415	0.0344828	0.0487515	0.0546968	0.0939358	0.019025
ARHGAP33	ENST00000007510.9	full-splice_match	1	0	0	4352	3861	95	396	0.656939	0.665285	0.75	0.55303	0.00622084	0.0178849	0.0248834	0.00699844	0.029549	0.0692068	0.0186625	0.029549	0.0303266	0.0793157	0.0715397	0.0311042	0.00466563	0.0209953	0.0303266	0.00699844	0.0241058	0.0684292	0.105754	0.0264386	0.0979782	0.12675	0.0575428	0.121306	0.0287714	0.0365474	0.0536547	0.0155521	0.0202177	0.0909798	0.121306	0.0349922	0.0233281	0.0365474	0.0738725	0.0225505
PDK2	ENST00000007708.7	full-splice_match	1	0	0	2384	1029	391	964	0.588507	0.580739	0.576531	0.60166	0.0146199	0.0438596	0.0526316	0.00584795	0.0614035	0.0935673	0.0380117	0.0321637	0.0409357	0.0760234	0.0467836	0.0292398	0	0.0614035	0.0614035	0.0146199	0.0701754	0.0730994	0.0730994	0.0847953	0.122807	0.0730994	0.0526316	0.0818713	0.0380117	0.0350877	0.0263158	0.0263158	0.0321637	0.0730994	0.0789474	0.0409357	0.0292398	0.0614035	0.0701754	0.0350877
LRRC23	ENST00000007969.12	full-splice_match	1	0	0	1615	1029	220	366	0.55356	0.532101	0.59276	0.590164	0.0321637	0.0555556	0.0847953	0.0321637	0.0584795	0.0906433	0.0175439	0.0233918	0.0935673	0.0526316	0.0964912	0.0233918	0.0116959	0.0497076	0.0614035	0.0263158	0.0467836	0.0409357	0.0760234	0.0467836	0.0672515	0.0497076	0.00877193	0.0818713	0.0263158	0.0116959	0.0146199	0.00877193	0.0350877	0.0526316	0.131579	0.0409357	0.111111	0.0643275	0.102339	0.0555556
SPRTN	ENST00000008440.9	full-splice_match	1	0	0	1667	621	128	918	0.430114	0.514516	0.697674	0.335512	0.0533981	0.0485437	0.0582524	0.0339806	0.0242718	0.0631068	0.0242718	0.0582524	0.0242718	0.038835	0.116505	0.0436893	0.0291262	0.0242718	0.0679612	0.0339806	0.038835	0.0436893	0.0728155	0.0242718	0.0582524	0.0291262	0.0291262	0.0291262	0.038835	0.0242718	0.0242718	0.038835	0.0339806	0.0194175	0.0631068	0.0533981	0.0825243	0.038835	0.0873786	0.0436893
DYRK4	ENST00000010132.6	full-splice_match	1	0	0	1840	1560	142	138	0.483152	0.498396	0.468531	0.326087	0.0578035	0.0404624	0.102119	0.0308285	0.0635838	0.0520231	0.0250482	0.0308285	0.0809249	0.0770713	0.0674374	0.0308285	0.0211946	0.0481696	0.0481696	0.026975	0.0789981	0.0481696	0.0847784	0.0500963	0.0674374	0.044316	0.017341	0.0712909	0.0154143	0.0134875	0.0346821	0.00578035	0.0308285	0.0520231	0.0770713	0.0520231	0.0809249	0.0558767	0.061657	0.0423892
SYPL1	ENST00000011473.6	full-splice_match	1	0	0	2127	777	47	1303	0.369064	0.444588	0.729167	0.310821	0.0542636	0.0310078	0.0426357	0.0503876	0.0465116	0.0348837	0.00775194	0.0697674	0.0387597	0.0426357	0.0503876	0.0387597	0.0542636	0.0465116	0.0465116	0.0581395	0.0465116	0.0426357	0.0658915	0.0426357	0.0620155	0.0193798	0.0155039	0.0697674	0.0155039	0.0155039	0.0193798	0.00775194	0.0465116	0.0542636	0.0736434	0.0891473	0.0387597	0.0193798	0.0426357	0.0542636
RANBP9	ENST00000011619.6	full-splice_match	1	0	0	3384	2187	330	867	0.496454	0.514181	0.797583	0.336794	0.0508242	0.0453297	0.0645604	0.0645604	0.0631868	0.0480769	0.0123626	0.0343407	0.0686813	0.0618132	0.0370879	0.0576923	0.0357143	0.0412088	0.0604396	0.0425824	0.0659341	0.0425824	0.0879121	0.0453297	0.0686813	0.0412088	0.0714286	0.0494505	0.0233516	0.0535714	0.0494505	0.0123626	0.0315934	0.0370879	0.0425824	0.0370879	0.0796703	0.0384615	0.0384615	0.0398352
CD4	ENST00000011653.9	full-splice_match	1	0	0	3049	1374	202	1473	0.545097	0.541879	0.586207	0.54243	0.0437637	0.0437637	0.102845	0.0218818	0.0393873	0.0634573	0.00437637	0.0415755	0.0875274	0.0568928	0.0809628	0.0525164	0.0218818	0.0306346	0.0262582	0.0175055	0.0503282	0.0393873	0.0897155	0.0328228	0.0722101	0.0547046	0.0175055	0.0897155	0.00875274	0.0131291	0.0306346	0.00656455	0.0153173	0.0743982	0.100656	0.0525164	0.0984683	0.04814	0.0547046	0.0371991
VPS13D	ENST00000011700.10	full-splice_match	1	0	0	10969	9629	0	1340	0.466952	0.473722	0	0.418657	0.0464367	0.0405153	0.0719925	0.0492416	0.0545398	0.0439435	0.0143362	0.0408269	0.0673177	0.0604613	0.0548514	0.0520465	0.0317889	0.04893	0.0545398	0.0548514	0.0573447	0.0430085	0.0866403	0.0520465	0.0732391	0.0355288	0.018076	0.0573447	0.0174527	0.00903802	0.0193227	0.0140245	0.0283607	0.0532932	0.0723042	0.0517349	0.0763557	0.0414502	0.0545398	0.0520465
QPCTL	ENST00000012049.10	full-splice_match	1	0	0	2125	1146	38	941	0.578353	0.634934	0.564103	0.510096	0.0104987	0.023622	0.0367454	0.0131234	0.0367454	0.0734908	0.023622	0.0341207	0.0131234	0.0708661	0.0472441	0.0183727	0.00524934	0.0393701	0.0183727	0.0183727	0.0341207	0.0787402	0.0498688	0.0314961	0.0813648	0.104987	0.0708661	0.0892388	0.0209974	0.0472441	0.0708661	0.0262467	0.0131234	0.0734908	0.136483	0.0577428	0.0393701	0.0393701	0.0603675	0.023622
HIVEP2	ENST00000012134.7	full-splice_match	1	0	0	9755	7338	776	1641	0.469503	0.492027	0.486486	0.360756	0.0568507	0.0388548	0.0871166	0.0319018	0.0568507	0.0486708	0.0130879	0.0380368	0.0879346	0.0809816	0.0580777	0.0453988	0.0233129	0.0437628	0.0625767	0.0470348	0.0625767	0.0543967	0.104703	0.0609407	0.0822086	0.0474438	0.0163599	0.0678937	0.0147239	0.0130879	0.0208589	0.0102249	0.0245399	0.0523517	0.0560327	0.0548057	0.0777096	0.0376278	0.0666667	0.0494888
MAP4K5	ENST00000013125.9	full-splice_match	1	0	0	4354	2538	319	1497	0.398025	0.409539	0.746875	0.303941	0.0946746	0.0627219	0.0579882	0.0840237	0.0769231	0.0461538	0.016568	0.0473373	0.0721893	0.0508876	0.0390533	0.0449704	0.0449704	0.0449704	0.0662722	0.0698225	0.0828402	0.035503	0.0828402	0.052071	0.0568047	0.0236686	0.00828402	0.0461538	0.0118343	0.00828402	0.0142012	0.00828402	0.0343195	0.0260355	0.0568047	0.0508876	0.0816568	0.0343195	0.0402367	0.0532544
INMT	ENST00000013222.5	full-splice_match	1	0	0	2559	789	16	1754	0.516608	0.59264	0.470588	0.482896	0.0152672	0.0267176	0.0763359	0.019084	0.0419847	0.0648855	0.00763359	0.0534351	0.0419847	0.0687023	0.0572519	0.0267176	0	0.00763359	0.0496183	0.0267176	0.0496183	0.0534351	0.0458015	0.0267176	0.0572519	0.0496183	0.0534351	0.0992366	0.0305344	0.0305344	0.0419847	0.0114504	0.0381679	0.0572519	0.133588	0.0572519	0.0687023	0.0458015	0.0687023	0.0343511
ERCC1	ENST00000013807.9	full-splice_match	1	0	0	1278	969	192	117	0.581377	0.583678	0.632124	0.478632	0.0465839	0.0403727	0.0807453	0.0279503	0.0496894	0.0714286	0.0186335	0.0248447	0.0869565	0.068323	0.068323	0.0279503	0.00931677	0.0403727	0.0341615	0.0217391	0.0590062	0.0434783	0.0962733	0.0279503	0.0807453	0.0931677	0.0403727	0.121118	0.0248447	0.0310559	0.0310559	0.0186335	0.0279503	0.0590062	0.0993789	0.0248447	0.0745342	0.0652174	0.0745342	0.0310559
GPRC5A	ENST00000014914.6	full-splice_match	1	0	0	6582	1071	110	5401	0.490277	0.537383	0.63964	0.477874	0.0308989	0.0280899	0.0533708	0.0280899	0.0449438	0.0421348	0.0308989	0.0337079	0.0393258	0.0421348	0.0421348	0.0224719	0.00842697	0.0449438	0.0617978	0.0224719	0.0477528	0.0505618	0.0505618	0.0505618	0.0589888	0.0393258	0.0280899	0.126404	0.0168539	0.0308989	0.0224719	0.0224719	0.0365169	0.0983146	0.0926966	0.0842697	0.0533708	0.0477528	0.0365169	0.0337079
DNASE1L1	ENST00000014935.7	full-splice_match	1	0	0	2652	906	794	952	0.559578	0.60221	0.587421	0.495798	0.00664452	0.0199336	0.0232558	0.0166113	0.0498339	0.0431894	0.0299003	0.0697674	0.013289	0.0963455	0.0631229	0.0199336	0.00332226	0.0299003	0.0465116	0.00996678	0.0431894	0.0863787	0.0863787	0.0265781	0.0830565	0.0664452	0.0332226	0.0863787	0.0232558	0.0431894	0.0332226	0.0299003	0.0332226	0.0598007	0.142857	0.0564784	0.013289	0.0531561	0.0797342	0.0332226
XYLT2	ENST00000017003.7	full-splice_match	1	0	0	3507	2595	15	897	0.61306	0.634156	0.6875	0.550725	0.00925926	0.0289352	0.0405093	0.0104167	0.0474537	0.0578704	0.03125	0.0416667	0.0416667	0.0891204	0.0659722	0.0347222	0.00694444	0.0231481	0.0405093	0.00925926	0.0486111	0.0648148	0.111111	0.0335648	0.0972222	0.0694444	0.0462963	0.0729167	0.0300926	0.0439815	0.0543981	0.0173611	0.0173611	0.037037	0.125	0.0347222	0.0289352	0.0613426	0.0717593	0.0243056
FTSJ1	ENST00000019019.6	full-splice_match	1	0	0	1986	981	429	576	0.539778	0.594898	0.609302	0.394097	0.0122699	0.0245399	0.0521472	0.0122699	0.0429448	0.0705521	0.0276074	0.0337423	0.0398773	0.0766871	0.0828221	0.0276074	0.0122699	0.0337423	0.0490798	0.0214724	0.0490798	0.0521472	0.104294	0.0398773	0.116564	0.0674847	0.0368098	0.0797546	0.0122699	0.0306748	0.0398773	0.0214724	0.0398773	0.0552147	0.110429	0.0306748	0.0306748	0.0613497	0.0582822	0.0460123
RALBP1	ENST00000019317.8	full-splice_match	1	0	0	4368	1965	223	2180	0.484661	0.473014	0.580357	0.485321	0.0917431	0.0336391	0.125382	0.0428135	0.0382263	0.0259939	0.0152905	0.0321101	0.12844	0.0917431	0.0795107	0.0443425	0.0198777	0.0351682	0.0703364	0.0474006	0.0504587	0.0198777	0.100917	0.0458716	0.0672783	0.0275229	0.0198777	0.0397554	0.0244648	0.0183486	0.0183486	0.0122324	0.0275229	0.0336391	0.058104	0.030581	0.119266	0.0366972	0.116208	0.0611621
PSD	ENST00000020673.6	full-splice_match	1	0	0	3824	3072	168	584	0.643828	0.64181	0.698225	0.638699	0.00879765	0.0156403	0.054741	0.0146628	0.0293255	0.0645161	0.0254154	0.0342131	0.0478983	0.0938416	0.083089	0.0293255	0.00488759	0.0244379	0.0391007	0.00293255	0.0391007	0.0625611	0.105572	0.0273705	0.0967742	0.102639	0.0391007	0.102639	0.030303	0.030303	0.0527859	0.00782014	0.0205279	0.0821114	0.109482	0.0420332	0.0430108	0.0488759	0.086999	0.0244379
SYT13	ENST00000020926.8	full-splice_match	1	0	0	5165	1278	134	3753	0.480348	0.610023	0.8	0.424727	0.0141176	0.0352941	0.0658824	0.0117647	0.0329412	0.08	0.0305882	0.04	0.0588235	0.0870588	0.0823529	0.0235294	0.00235294	0.0258824	0.0329412	0.0117647	0.0423529	0.0635294	0.101176	0.0258824	0.0964706	0.0517647	0.0305882	0.0941176	0.0258824	0.0329412	0.0423529	0.0141176	0.0352941	0.0682353	0.143529	0.0141176	0.0564706	0.0682353	0.08	0.0235294
RTF2	ENST00000023939.8	full-splice_match	1	0	0	1745	1008	113	624	0.513467	0.497517	0.649123	0.514423	0.0716418	0.041791	0.149254	0.0447761	0.0656716	0.0238806	0.0238806	0.0298507	0.0955224	0.0716418	0.0776119	0.041791	0.0208955	0.0268657	0.0597015	0.0298507	0.0686567	0.041791	0.0597015	0.0358209	0.0626866	0.0268657	0.0179104	0.041791	0.0238806	0.0119403	0.0238806	0.0208955	0.0208955	0.038806	0.0776119	0.041791	0.137313	0.0447761	0.0656716	0.0447761
RB1CC1	ENST00000025008.10	full-splice_match	1	0	0	6636	4782	527	1327	0.375678	0.372516	0.619318	0.290128	0.111111	0.0596359	0.111739	0.0828625	0.0652856	0.0269931	0.0100439	0.0564972	0.121155	0.042059	0.0389203	0.0615191	0.042059	0.042059	0.0659134	0.0703076	0.0652856	0.0238544	0.0728186	0.0439422	0.037037	0.0119272	0.00502197	0.0338983	0.0112994	0.00376648	0.00502197	0.00627746	0.0320151	0.0269931	0.0546139	0.0590082	0.132454	0.0357815	0.0464532	0.0564972
AKAP11	ENST00000025301.4	full-splice_match	1	0	0	9915	5703	176	4036	0.37297	0.400386	0.463277	0.330278	0.0852632	0.0457895	0.0952632	0.0652632	0.0584211	0.0336842	0.00736842	0.0473684	0.0873684	0.0536842	0.0436842	0.0773684	0.0447368	0.05	0.0684211	0.0552632	0.0631579	0.0368421	0.0905263	0.0542105	0.0478947	0.0173684	0.00631579	0.0410526	0.00842105	0.00368421	0.00526316	0.00631579	0.0352632	0.0378947	0.0557895	0.0573684	0.0894737	0.0326316	0.0415789	0.0615789
RNASET2	ENST00000028008.9	full-splice_match	1	1	0	1220	213	402	605	0.588525	0.570755	0.741935	0.492562	0.0571429	0.0428571	0.0285714	0.0428571	0.0714286	0.0285714	0.0142857	0.0714286	0.0428571	0.0571429	0	0.0285714	0.0142857	0	0.0714286	0.0428571	0.0714286	0.0142857	0.0428571	0.0285714	0.0142857	0.0714286	0.0285714	0.128571	0.0428571	0.0428571	0.0571429	0.0285714	0.0285714	0.0285714	0.185714	0.0142857	0.0285714	0.1	0.0571429	0.0142857
SLC39A9	ENST00000031146.8	full-splice_match	1	0	0	5192	723	678	3791	0.433552	0.51662	0.537555	0.399103	0.0125	0.0125	0.05	0.0375	0.0416667	0.025	0.025	0.0333333	0.0416667	0.0833333	0.05	0.0458333	0.0166667	0.0458333	0.0666667	0.0375	0.0208333	0.0541667	0.0916667	0.0791667	0.0708333	0.0291667	0.0166667	0.0625	0.0125	0.0125	0.025	0.00833333	0.0166667	0.0416667	0.1125	0.0666667	0.0583333	0.0333333	0.05	0.0333333
FAM13B	ENST00000033079.7	full-splice_match	1	0	0	5465	2745	452	2268	0.397987	0.399052	0.569536	0.362434	0.0787746	0.0503282	0.118162	0.0700219	0.0623632	0.02407	0.00875274	0.0382932	0.122538	0.0645514	0.0525164	0.04814	0.0382932	0.0459519	0.0667396	0.0722101	0.0689278	0.0284464	0.0733042	0.0437637	0.04814	0.012035	0.00765864	0.0339168	0.00547046	0.00437637	0.00656455	0.0109409	0.0262582	0.0284464	0.0568928	0.0601751	0.133479	0.0273523	0.0623632	0.0667396
CHPF2	ENST00000035307.7	full-splice_match	1	0	0	3989	2316	1529	144	0.613938	0.623758	0.615033	0.444444	0.0077821	0.0207523	0.0311284	0.0129702	0.0363165	0.0570687	0.0220493	0.0440986	0.0440986	0.0700389	0.076524	0.0233463	0.00648508	0.0233463	0.0324254	0.0129702	0.0259403	0.0544747	0.0920882	0.0311284	0.0596628	0.07393	0.0505837	0.0907912	0.0324254	0.0285344	0.0544747	0.0220493	0.0298314	0.076524	0.128405	0.0479896	0.0389105	0.0492866	0.077821	0.0207523
TTC17	ENST00000039989.9	full-splice_match	1	0	0	4488	3423	35	1030	0.451872	0.464348	0.777778	0.399029	0.0631579	0.0464912	0.0657895	0.0622807	0.0552632	0.0438596	0.0201754	0.0570175	0.0894737	0.0605263	0.05	0.0377193	0.0421053	0.0429825	0.0684211	0.0464912	0.0640351	0.0517544	0.0842105	0.0535088	0.0719298	0.0245614	0.0149123	0.0552632	0.0122807	0.0131579	0.0149123	0.0157895	0.0368421	0.0438596	0.0684211	0.0587719	0.0850877	0.0429825	0.0552632	0.0429825
MRI1	ENST00000040663.8	full-splice_match	1	0	0	3178	1107	67	2004	0.533354	0.649186	0.705882	0.463573	0.00271739	0.0271739	0.0298913	0.00543478	0.0380435	0.0923913	0.0190217	0.0217391	0.0434783	0.0842391	0.0543478	0.00543478	0.00543478	0.0326087	0.0461957	0.0217391	0.0298913	0.0625	0.0679348	0.0516304	0.0788043	0.076087	0.0896739	0.0815217	0.0353261	0.0625	0.0652174	0.0244565	0.0353261	0.0461957	0.11413	0.0271739	0.0244565	0.0652174	0.0788043	0.0380435
BOD1L1	ENST00000040738.10	full-splice_match	1	0	0	10567	9153	138	1276	0.431911	0.442417	0.690647	0.32837	0.109508	0.0563934	0.137377	0.0577049	0.0678689	0.037377	0.012459	0.0409836	0.122623	0.0642623	0.0701639	0.0616393	0.0354098	0.0311475	0.0606557	0.0380328	0.0708197	0.0439344	0.0937705	0.0396721	0.0645902	0.0190164	0.0144262	0.0321311	0.0131148	0.0118033	0.0137705	0.00688525	0.0209836	0.0344262	0.0544262	0.0337705	0.138033	0.0409836	0.0639344	0.0481967
TARBP1	ENST00000040877.2	full-splice_match	1	0	0	5206	4863	76	267	0.478678	0.486014	0.753247	0.265918	0.0524691	0.0290123	0.0648148	0.0518519	0.0339506	0.0320988	0.0154321	0.0358025	0.0648148	0.0537037	0.0481481	0.0475309	0.0339506	0.0345679	0.0493827	0.0635802	0.05	0.0222222	0.0679012	0.0401235	0.0524691	0.0296296	0.0265432	0.0444444	0.0148148	0.037037	0.037037	0.0185185	0.0246914	0.0376543	0.087037	0.0574074	0.0679012	0.0432099	0.0549383	0.0395062
RIPOR1	ENST00000042381.9	full-splice_match	1	0	0	4092	3657	109	326	0.606549	0.61023	0.754545	0.515337	0.0139573	0.0213465	0.0500821	0.0147783	0.0525452	0.0623974	0.0164204	0.045156	0.044335	0.0837438	0.0673235	0.0500821	0.0139573	0.0238095	0.0410509	0.0106732	0.0418719	0.0706076	0.109195	0.0410509	0.109195	0.108374	0.0369458	0.0993432	0.0205255	0.0238095	0.0394089	0.0106732	0.0394089	0.0656814	0.112479	0.0369458	0.0369458	0.045977	0.0665025	0.0197044
GOPC	ENST00000052569.10	full-splice_match	1	0	0	4590	1362	240	2988	0.3939	0.468773	0.688797	0.336011	0.0816777	0.0441501	0.11479	0.0441501	0.0573951	0.0353201	0.0154525	0.0353201	0.0860927	0.0640177	0.0596026	0.0507726	0.0242826	0.0485651	0.0640177	0.0419426	0.0728477	0.0353201	0.0573951	0.0441501	0.0529801	0.01766	0.0154525	0.0441501	0.0154525	0.00441501	0.0242826	0.01766	0.0220751	0.0375276	0.0883002	0.0397351	0.0949227	0.0441501	0.0618102	0.0640177
THAP3	ENST00000054650.9	full-splice_match	1	0	0	1361	717	156	488	0.601763	0.596369	0.649682	0.594262	0.0546218	0.0462185	0.0840336	0.0210084	0.0546218	0.0378151	0.0168067	0.0420168	0.0756303	0.105042	0.092437	0.0252101	0	0.0168067	0.0378151	0.00420168	0.0504202	0.0630252	0.134454	0.0168067	0.0756303	0.0546218	0.0882353	0.0588235	0.0210084	0.0462185	0.0588235	0.0210084	0.012605	0.0504202	0.0714286	0.0630252	0.092437	0.0378151	0.0714286	0.0168067
PPP1R3F	ENST00000055335.11	full-splice_match	1	0	0	3477	2397	77	1003	0.618924	0.670701	0.807692	0.480558	0.00626566	0.0150376	0.0363409	0.0075188	0.0288221	0.0438596	0.0250627	0.0162907	0.0438596	0.0651629	0.0864662	0.0263158	0.0075188	0.0238095	0.0451128	0.00501253	0.0162907	0.0451128	0.0877193	0.0263158	0.0651629	0.0889724	0.0827068	0.0827068	0.0388471	0.0601504	0.0701754	0.0213033	0.0125313	0.0588972	0.101504	0.0300752	0.0413534	0.037594	0.0877193	0.0426065
NEXMIF	ENST00000055682.12	full-splice_match	1	0	0	11717	4548	617	6552	0.409064	0.450407	0.665049	0.356227	0.0811881	0.049505	0.0963696	0.0693069	0.0561056	0.0422442	0.00726073	0.0429043	0.0752475	0.0547855	0.060066	0.0514851	0.0356436	0.0481848	0.0792079	0.0481848	0.0924092	0.0415842	0.0660066	0.0481848	0.0726073	0.0415842	0.00924092	0.0594059	0.00990099	0.00594059	0.00792079	0.00462046	0.0376238	0.0514851	0.0666667	0.0442244	0.0778878	0.0376238	0.0574257	0.0574257
ARHGEF5	ENST00000056217.10	full-splice_match	1	0	0	5482	4791	112	579	0.564393	0.568058	0.752212	0.497409	0.0275689	0.0394737	0.0645363	0.0206767	0.0469925	0.0545113	0.0169173	0.0407268	0.0802005	0.0789474	0.100877	0.0369674	0.0150376	0.0307018	0.0382206	0.0206767	0.0488722	0.0444862	0.118421	0.0394737	0.0971178	0.0670426	0.0281955	0.0839599	0.0194236	0.0175439	0.023183	0.0125313	0.0250627	0.0833333	0.0839599	0.0401003	0.0670426	0.0551378	0.0983709	0.0300752
TLL1	ENST00000061240.7	full-splice_match	1	0	0	7291	3039	668	3584	0.407214	0.4447	0.67713	0.325056	0.0563241	0.0474308	0.0859684	0.0602767	0.0642292	0.0454545	0.0177866	0.0424901	0.0889328	0.0434783	0.0454545	0.0474308	0.0464427	0.0365613	0.0750988	0.0583004	0.0701581	0.0375494	0.0632411	0.0365613	0.0513834	0.0237154	0.0118577	0.0434783	0.0217391	0.00889328	0.0128458	0.0128458	0.0365613	0.0286561	0.0652174	0.0494071	0.0909091	0.0444664	0.0583004	0.0750988
CLDN11	ENST00000064724.8	full-splice_match	1	0	0	2758	621	199	1938	0.464467	0.627419	0.75	0.382869	0.00485437	0.00485437	0.0242718	0.00485437	0.0194175	0.0582524	0.0242718	0.0436893	0.0145631	0.038835	0.0339806	0.00970874	0	0.0436893	0.038835	0.0194175	0.0194175	0.0631068	0.0339806	0.0582524	0.092233	0.0631068	0.0485437	0.0873786	0.0194175	0.0242718	0.0485437	0.0533981	0.0339806	0.0582524	0.18932	0.0291262	0.00970874	0.038835	0.0339806	0.0339806
FAM168A	ENST00000064778.8	full-splice_match	1	0	0	7296	732	285	6279	0.505345	0.582763	0.716783	0.486702	0.00411523	0.0576132	0.0246914	0.0205761	0.0823045	0.119342	0.0246914	0.0411523	0.037037	0.0740741	0.037037	0.0288066	0.0205761	0.0411523	0.0576132	0.0123457	0.0534979	0.0946502	0.123457	0.0617284	0.152263	0.119342	0.0329218	0.102881	0.0205761	0.00411523	0.037037	0.0205761	0.0534979	0.0452675	0.0946502	0.0246914	0.0411523	0.0288066	0.0205761	0.0123457
CDC27	ENST00000066544.8	full-splice_match	1	0	0	5830	2472	123	3235	0.368096	0.398624	0.685484	0.332612	0.0959903	0.0656136	0.0801944	0.0814095	0.0777643	0.0376671	0.00972053	0.0522479	0.0789793	0.0522479	0.0461725	0.0461725	0.0473876	0.0449575	0.0534629	0.0777643	0.0923451	0.0437424	0.0741191	0.0437424	0.0607533	0.0243013	0.0072904	0.0510328	0.0072904	0.0121507	0.00972053	0.00486027	0.036452	0.0425273	0.0473876	0.0643985	0.0886999	0.0230863	0.0388821	0.0498177
PKP2	ENST00000070846.11	full-splice_match	1	0	0	4361	2643	46	1672	0.464572	0.536336	0.765957	0.342703	0.0465909	0.0454545	0.0704545	0.0352273	0.0693182	0.0511364	0.0215909	0.0420455	0.0772727	0.0784091	0.0579545	0.0409091	0.0181818	0.0363636	0.0454545	0.0363636	0.0522727	0.0522727	0.114773	0.0477273	0.0772727	0.0352273	0.0420455	0.0590909	0.0238636	0.0272727	0.0397727	0.0193182	0.0284091	0.0522727	0.0886364	0.0329545	0.0761364	0.0556818	0.0636364	0.0306818
IL1RAP	ENST00000072516.7	full-splice_match	1	0	0	4697	1710	170	2817	0.381094	0.44529	0.619883	0.327654	0.0667838	0.0439367	0.086116	0.0527241	0.0439367	0.0351494	0.0193322	0.0527241	0.0738137	0.0509666	0.0509666	0.0579965	0.0333919	0.0333919	0.0790861	0.0632689	0.056239	0.0351494	0.0685413	0.059754	0.059754	0.026362	0.0175747	0.0492091	0.0140598	0.0123023	0.0158172	0.0105448	0.0404218	0.0509666	0.0615114	0.0333919	0.0966608	0.0369069	0.0474517	0.0474517
INPP4A	ENST00000074304.9	full-splice_match	1	0	0	6752	2931	393	3428	0.477784	0.548805	0.675127	0.394399	0.0307377	0.0307377	0.0625	0.0286885	0.0522541	0.0481557	0.0368852	0.0338115	0.0737705	0.0655738	0.067623	0.0420082	0.017418	0.0471311	0.0522541	0.0286885	0.0532787	0.0491803	0.0881148	0.0706967	0.0758197	0.0471311	0.0358607	0.0645492	0.0266393	0.0307377	0.0358607	0.0286885	0.017418	0.0430328	0.0973361	0.0358607	0.0502049	0.0604508	0.0778689	0.0379098
CTDP1	ENST00000075430.11	full-splice_match	1	0	0	3538	2601	102	835	0.631713	0.647692	0.747573	0.567665	0.0150115	0.0196305	0.0554273	0.0150115	0.0381062	0.0484988	0.039261	0.0254042	0.0600462	0.0923788	0.095843	0.02194	0.00923788	0.0300231	0.0300231	0.0103926	0.0288684	0.0577367	0.0889145	0.0242494	0.0600462	0.0635104	0.0842956	0.0635104	0.056582	0.0600462	0.0785219	0.0196305	0.00923788	0.0415704	0.0935335	0.0254042	0.0531178	0.0577367	0.120092	0.0288684
STYK1	ENST00000075503.8	full-splice_match	1	0	0	2771	1266	281	1224	0.450379	0.509091	0.510638	0.375817	0.0332542	0.0380048	0.0736342	0.0213777	0.0427553	0.0570071	0.00712589	0.0380048	0.0570071	0.0736342	0.0522565	0.0451306	0.0190024	0.0546318	0.0665083	0.0261283	0.0475059	0.0380048	0.0712589	0.0593824	0.0617577	0.0285036	0.0142518	0.0807601	0.00950119	0.0142518	0.0166271	0.0118765	0.0475059	0.064133	0.111639	0.0522565	0.0688836	0.0356295	0.0593824	0.04038
CREB3L3	ENST00000078445.7	full-splice_match	1	0	0	2588	1383	117	1088	0.596213	0.608538	0.661017	0.573529	0.0282609	0.0347826	0.0608696	0.0195652	0.0304348	0.073913	0.0304348	0.0391304	0.0586957	0.0695652	0.073913	0.0326087	0.00869565	0.0478261	0.0217391	0.00652174	0.0434783	0.0543478	0.0934783	0.0326087	0.0804348	0.0695652	0.05	0.11087	0.0543478	0.023913	0.0347826	0.0108696	0.00869565	0.0869565	0.145652	0.0282609	0.0673913	0.073913	0.0717391	0.0282609
HDAC7	ENST00000080059.12	full-splice_match	1	0	0	4213	2973	118	1122	0.626869	0.643001	0.764706	0.569519	0.0141414	0.0252525	0.0373737	0.0151515	0.0373737	0.0545455	0.0161616	0.0323232	0.0464646	0.0959596	0.0585859	0.0353535	0.00606061	0.0262626	0.0393939	0.00808081	0.0393939	0.0535354	0.119192	0.0383838	0.0939394	0.1	0.0555556	0.0919192	0.0161616	0.0434343	0.0565657	0.010101	0.0151515	0.0767677	0.125253	0.0333333	0.0333333	0.0505051	0.0676768	0.0232323
RPL18	ENST00000084795.9	full-splice_match	1	0	0	612	568	0	44	0.580065	0.597884	1	0.340909	0.0265487	0.0584071	0.0902655	0	0.0477876	0.0743363	0.0159292	0.0371681	0.0477876	0.0477876	0.116814	0.0212389	0.0212389	0.0265487	0.0318584	0.0106195	0.079646	0.0424779	0.079646	0.0318584	0.100885	0.0530973	0.100885	0.0584071	0.0318584	0.0530973	0.0690265	0.0212389	0.0212389	0.0424779	0.0690265	0.0159292	0.0530973	0.0424779	0.0584071	0.0371681
EPN1	ENST00000085079.11	full-splice_match	1	0	0	2355	1650	292	413	0.678981	0.674348	0.778157	0.627119	0.00364299	0.0218579	0.0418944	0.010929	0.0273224	0.0710383	0.0455373	0.0218579	0.0455373	0.0856102	0.0692168	0.0200364	0	0.0291439	0.0400729	0.00546448	0.0455373	0.0582878	0.0856102	0.0327869	0.0874317	0.120219	0.0692168	0.107468	0.0382514	0.0491803	0.0655738	0.0400729	0.00910747	0.0692168	0.10929	0.0236794	0.0255009	0.0710383	0.0874317	0.0309654
HDHD5	ENST00000155674.9	full-splice_match	1	0	0	1735	1179	43	513	0.571758	0.598472	0.545455	0.512671	0.0229592	0.0331633	0.0408163	0.0204082	0.0459184	0.0586735	0.0280612	0.0153061	0.0357143	0.0816327	0.0688776	0.0229592	0.00765306	0.0306122	0.0790816	0.00765306	0.0408163	0.0459184	0.0892857	0.0433673	0.0867347	0.0688776	0.0433673	0.0892857	0.0255102	0.0204082	0.0408163	0.0229592	0.0204082	0.0561224	0.104592	0.0510204	0.0484694	0.0408163	0.0714286	0.0433673
KCNQ1	ENST00000155840.12	full-splice_match	1	0	0	3224	2028	91	1105	0.635546	0.642822	0.793478	0.60905	0.0118519	0.0207407	0.0548148	0.00444444	0.0340741	0.0651852	0.0325926	0.0237037	0.0518519	0.0622222	0.0533333	0.0266667	0.00296296	0.0459259	0.0281481	0.0133333	0.0311111	0.0622222	0.0785185	0.0577778	0.0874074	0.0785185	0.0725926	0.0725926	0.0296296	0.0696296	0.0740741	0.0385185	0.0162963	0.0681481	0.0888889	0.0414815	0.042963	0.0474074	0.0562963	0.0207407
OTUD5	ENST00000156084.8	full-splice_match	1	0	0	2740	1713	61	966	0.595255	0.617407	0.725806	0.547619	0.0245614	0.0385965	0.0421053	0.0192982	0.0561404	0.0473684	0.0192982	0.0280702	0.0421053	0.0684211	0.0719298	0.0368421	0.0105263	0.0298246	0.054386	0.022807	0.0438596	0.0385965	0.1	0.0526316	0.0719298	0.0578947	0.0719298	0.0561404	0.0368421	0.0578947	0.0842105	0.0263158	0.0315789	0.0385965	0.0578947	0.0298246	0.0491228	0.045614	0.0666667	0.0298246
AQR	ENST00000156471.10	full-splice_match	1	0	0	9597	4455	129	5013	0.401167	0.418725	0.623077	0.379812	0.0619946	0.0525606	0.0754717	0.069407	0.0512129	0.0471698	0.0114555	0.0572776	0.0956873	0.0384097	0.0424528	0.041779	0.041779	0.0498652	0.0761456	0.06469	0.06469	0.032345	0.0680593	0.0559299	0.0667116	0.0330189	0.00808625	0.0438005	0.0141509	0.00876011	0.0074124	0.0128032	0.0336927	0.0377358	0.059973	0.0700809	0.0950135	0.0411051	0.0485175	0.0566038
CAMKK1	ENST00000158166.5	full-splice_match	1	0	0	2459	1560	149	750	0.606344	0.588198	0.76	0.613333	0.017341	0.0308285	0.0712909	0.0154143	0.0308285	0.0423892	0.0404624	0.0346821	0.0751445	0.088632	0.0809249	0.0366089	0.00385356	0.0520231	0.0385356	0.0192678	0.0462428	0.0462428	0.105973	0.0366089	0.1079	0.0693642	0.0192678	0.0828516	0.0289017	0.0134875	0.0385356	0.0308285	0.0231214	0.0462428	0.0982659	0.0327553	0.0693642	0.0481696	0.0924855	0.044316
FAM50A	ENST00000158526.9	full-splice_match	1	0	0	1240	780	460	0	0.604032	0.554557	0.687636	0	0.019305	0.019305	0.15444	0.011583	0.030888	0.046332	0.030888	0.034749	0.127413	0.0926641	0.131274	0.03861	0	0.0540541	0.0540541	0.003861	0.0579151	0.0579151	0.0772201	0.03861	0.0617761	0.015444	0.015444	0.034749	0.034749	0.019305	0.046332	0.023166	0.011583	0.042471	0.0617761	0.0501931	0.123552	0.0540541	0.169884	0.0579151
ANO8	ENST00000159087.7	full-splice_match	1	0	0	4178	3696	185	297	0.65821	0.669824	0.768817	0.444444	0.00893582	0.0178716	0.0438668	0.00893582	0.0235581	0.0479285	0.0381803	0.0170593	0.034931	0.0885459	0.0869212	0.0235581	0.00324939	0.0259951	0.0292445	0.0113729	0.0284322	0.0471162	0.0796101	0.0316816	0.0706742	0.0844842	0.0885459	0.0787977	0.0471162	0.0690496	0.0804224	0.0333063	0.0219334	0.0495532	0.100731	0.034931	0.0381803	0.0389927	0.103168	0.0203087
KDM4B	ENST00000159111.9	full-splice_match	1	0	0	5604	3288	226	2090	0.614026	0.640097	0.696035	0.564115	0.00913242	0.0246575	0.0611872	0.0109589	0.0283105	0.0584475	0.0584475	0.0292237	0.0484018	0.0757991	0.083105	0.0292237	0.00639269	0.0465753	0.0292237	0.00730594	0.0429224	0.0575342	0.0703196	0.0511416	0.0894977	0.0721461	0.0684932	0.0812785	0.0347032	0.0639269	0.0812785	0.0273973	0.0246575	0.0429224	0.0922374	0.0319635	0.0493151	0.0557078	0.0931507	0.0219178
CAMSAP3	ENST00000160298.9	full-splice_match	1	0	0	4137	3747	140	250	0.67561	0.673251	0.851064	0.612	0.0160256	0.0216346	0.0464744	0.00801282	0.0296474	0.0584936	0.0336538	0.0216346	0.0352564	0.0905449	0.0801282	0.025641	0.00560897	0.0240385	0.0240385	0.0104167	0.0408654	0.0560897	0.0913462	0.0288462	0.0985577	0.109776	0.0857372	0.0769231	0.0528846	0.0608974	0.0801282	0.0200321	0.00961538	0.0584936	0.0945513	0.0336538	0.0344551	0.0496795	0.0905449	0.0216346
CTTNBP2	ENST00000160373.8	full-splice_match	1	0	0	5904	4989	26	889	0.455623	0.48757	0.555556	0.273341	0.0607702	0.0505415	0.0920578	0.0517449	0.0565584	0.0499398	0.0138387	0.0463297	0.078219	0.0661853	0.0583634	0.0499398	0.0270758	0.034296	0.05716	0.0330927	0.0770156	0.0475331	0.0866426	0.0391095	0.0709988	0.0397112	0.0156438	0.0643803	0.0156438	0.0162455	0.0144404	0.011432	0.0252708	0.0505415	0.0926594	0.0481348	0.0830325	0.0493381	0.0523466	0.0379061
CIC	ENST00000160740.7	full-splice_match	1	0	0	6111	4818	685	608	0.672558	0.661823	0.841108	0.567434	0.00872274	0.0174455	0.0461059	0.00809969	0.034891	0.0753894	0.0168224	0.0305296	0.0380062	0.0965732	0.0697819	0.0342679	0.00124611	0.023053	0.0274143	0.00685358	0.0380062	0.0772586	0.119626	0.0299065	0.127103	0.133956	0.047352	0.11215	0.0149533	0.0336449	0.0554517	0.0174455	0.0124611	0.0679128	0.117134	0.0305296	0.0311526	0.0442368	0.0635514	0.0143302
CEACAM1	ENST00000161559.11	full-splice_match	1	0	0	3491	1578	107	1806	0.470066	0.513633	0.592593	0.424695	0.0419048	0.0761905	0.0590476	0.0533333	0.0780952	0.102857	0.00952381	0.047619	0.0495238	0.0685714	0.0514286	0.0552381	0.032381	0.0361905	0.0495238	0.0266667	0.0971429	0.0857143	0.108571	0.0361905	0.102857	0.0819048	0.0209524	0.0838095	0.00952381	0.00761905	0.0133333	0.0171429	0.04	0.0666667	0.0780952	0.0342857	0.0590476	0.0457143	0.04	0.0304762
YTHDC2	ENST00000161863.9	full-splice_match	1	0	0	6305	4290	202	1813	0.400793	0.421777	0.625616	0.325979	0.083275	0.043387	0.0755773	0.0692792	0.0559832	0.030091	0.013296	0.0440868	0.0790763	0.0496851	0.0468859	0.0615815	0.043387	0.039888	0.0657803	0.0650805	0.0573828	0.0216935	0.0797761	0.0461861	0.0454864	0.0111966	0.0104969	0.043387	0.0181945	0.00839748	0.0118964	0.00979706	0.0307908	0.0391882	0.0643807	0.0601819	0.0888733	0.0377887	0.0454864	0.0650805
BCAR1	ENST00000162330.10	full-splice_match	1	0	0	4085	2610	142	1333	0.65459	0.664239	0.839161	0.615904	0.00345224	0.0218642	0.0437284	0.00460299	0.0379747	0.0771001	0.0494822	0.0195627	0.0299194	0.0828539	0.0759494	0.027618	0.00460299	0.0195627	0.0414269	0.00115075	0.0425777	0.0678941	0.111623	0.0310702	0.113924	0.100115	0.0701956	0.0874568	0.0299194	0.0563867	0.0552359	0.0345224	0.0195627	0.0460299	0.110472	0.0241657	0.0253165	0.0678941	0.0552359	0.0172612
FOXJ2	ENST00000162391.8	full-splice_match	1	0	0	5524	1722	1132	2670	0.512853	0.568274	0.64519	0.420974	0.0139616	0.0331588	0.0593368	0.0296684	0.0593368	0.08726	0.0139616	0.052356	0.0558464	0.104712	0.0575916	0.0296684	0.017452	0.04363	0.0453752	0.026178	0.0645724	0.0994764	0.132635	0.0418848	0.125654	0.0907504	0.0244328	0.0994764	0.017452	0.0157068	0.017452	0.0052356	0.034904	0.0924956	0.069808	0.0383944	0.0418848	0.0471204	0.0488656	0.0383944
CELSR3	ENST00000164024.5	full-splice_match	1	0	0	11933	9936	252	1745	0.613676	0.623855	0.810277	0.527221	0.00845666	0.0299003	0.0241619	0.0184234	0.0453035	0.0594986	0.0311084	0.0431894	0.0371489	0.0658411	0.0558744	0.0332226	0.00845666	0.0286922	0.0453035	0.012383	0.038961	0.064029	0.0945334	0.038659	0.0845666	0.0619148	0.0540622	0.0815464	0.0280882	0.0540622	0.0567804	0.025068	0.025974	0.0688614	0.112051	0.0401691	0.0280882	0.0594986	0.0604047	0.025672
BCL3	ENST00000164227.10	full-splice_match	1	0	0	1877	1362	83	432	0.663825	0.689934	0.797619	0.555556	0.00662252	0.0331126	0.013245	0.00883002	0.0463576	0.0794702	0.0375276	0.0154525	0.0220751	0.0750552	0.0309051	0.00883002	0.00441501	0.0220751	0.0353201	0.013245	0.0331126	0.0662252	0.0772627	0.0485651	0.0816777	0.116998	0.125828	0.110375	0.0309051	0.108168	0.0794702	0.0264901	0.013245	0.0927152	0.101545	0.0331126	0.01766	0.0573951	0.0397351	0.0110375
PIGB	ENST00000164305.10	full-splice_match	1	0	0	1910	1662	29	219	0.400524	0.407586	0.666667	0.310502	0.0506329	0.0379747	0.0669078	0.0542495	0.0470163	0.0361664	0.00904159	0.074141	0.0614828	0.039783	0.0271248	0.0470163	0.039783	0.0433996	0.0650995	0.0759494	0.0542495	0.0488246	0.0524412	0.0650995	0.0560579	0.0289331	0.00904159	0.045208	0.00723327	0.0126582	0.0126582	0.00542495	0.0307414	0.0433996	0.0669078	0.0904159	0.0705244	0.0235081	0.0379747	0.0488246
PDZD4	ENST00000164640.8	full-splice_match	1	0	0	3689	2307	192	1190	0.642722	0.651344	0.766839	0.605882	0.0182292	0.0403646	0.0611979	0.00911458	0.0325521	0.0625	0.0442708	0.0208333	0.0533854	0.119792	0.0664063	0.0234375	0.00520833	0.0286458	0.0442708	0.00911458	0.0507812	0.0455729	0.0729167	0.0325521	0.0638021	0.0703125	0.0911458	0.0677083	0.0520833	0.0572917	0.0872396	0.0221354	0.0117188	0.0429688	0.105469	0.0143229	0.0520833	0.0598958	0.119792	0.0325521
REEP1	ENST00000165698.9	full-splice_match	1	0	0	3857	603	144	3110	0.428312	0.524917	0.813793	0.39164	0.05	0.015	0.065	0.025	0.06	0.05	0.025	0.025	0.04	0.07	0.065	0.015	0.02	0.045	0.055	0.055	0.045	0.075	0.08	0.05	0.075	0.045	0.02	0.07	0.015	0.025	0.055	0.01	0.035	0.04	0.075	0.065	0.045	0.04	0.03	0.045
FSTL3	ENST00000166139.9	full-splice_match	1	0	0	2501	789	32	1680	0.643343	0.709391	0.666667	0.611905	0.00381679	0.0343511	0.0229008	0	0.0305344	0.0648855	0.0267176	0.0229008	0.0305344	0.0458015	0.0458015	0.0267176	0	0.0114504	0.019084	0.00763359	0.0381679	0.0648855	0.0687023	0.0267176	0.0877863	0.0801527	0.0992366	0.0916031	0.0305344	0.0954198	0.0954198	0.0610687	0.00763359	0.0648855	0.114504	0.0343511	0.019084	0.0343511	0.0610687	0.0114504
EPHA8	ENST00000166244.8	full-splice_match	1	0	0	5019	3015	147	1857	0.640566	0.651958	0.837838	0.606354	0.00697211	0.0229084	0.0318725	0.0109562	0.0338645	0.0776892	0.0368526	0.0328685	0.0418327	0.063745	0.0567729	0.0278884	0.00298805	0.0428287	0.0408367	0.00697211	0.0398406	0.0667331	0.0816733	0.0527888	0.0836653	0.0677291	0.0776892	0.0856574	0.0388446	0.0557769	0.0747012	0.0328685	0.0288845	0.063745	0.101594	0.0239044	0.0249004	0.060757	0.0717131	0.0209163
P4HA2	ENST00000166534.8	full-splice_match	1	0	0	2230	1605	222	403	0.523767	0.528678	0.605381	0.459057	0.0393258	0.0430712	0.0636704	0.0299625	0.0580524	0.0543071	0.0205993	0.0468165	0.0636704	0.0674157	0.0842697	0.0374532	0.011236	0.0318352	0.0599251	0.0243446	0.0599251	0.0430712	0.076779	0.0280899	0.0524345	0.0337079	0.0262172	0.0636704	0.0262172	0.0168539	0.0205993	0.0187266	0.0411985	0.0318352	0.110487	0.0486891	0.0561798	0.0580524	0.0917603	0.0486891
VASH1	ENST00000167106.9	full-splice_match	1	0	0	6449	1095	1354	4000	0.600558	0.6234	0.685609	0.5655	0.0247253	0.0274725	0.0879121	0.0164835	0.043956	0.0686813	0.0412088	0.0247253	0.0769231	0.0851648	0.0686813	0.0192308	0.00274725	0.0302198	0.0384615	0.00824176	0.0549451	0.0549451	0.0879121	0.021978	0.0879121	0.0604396	0.0686813	0.0741758	0.032967	0.0741758	0.0494505	0.0384615	0.021978	0.0384615	0.0796703	0.0384615	0.0714286	0.0604396	0.0741758	0.0412088
LLGL2	ENST00000167462.9	full-splice_match	1	0	0	3480	3045	130	305	0.641379	0.643233	0.78626	0.560656	0.00394477	0.0216963	0.0374753	0.00690335	0.030572	0.0719921	0.030572	0.0285996	0.0414201	0.0946746	0.0700197	0.0335306	0.000986193	0.0315582	0.0285996	0.00690335	0.0364892	0.0680473	0.114398	0.030572	0.0877712	0.066075	0.0522682	0.086785	0.0315582	0.0394477	0.0700197	0.0335306	0.0197239	0.061144	0.11144	0.0384615	0.0266272	0.0463511	0.0828402	0.0266272
ARHGEF10L	ENST00000167825.5	full-splice_match	1	1	0	3018	1833	0	1185	0.606693	0.621725	0	0.583966	0.00983607	0.0295082	0.0508197	0.0114754	0.047541	0.0639344	0.0245902	0.0229508	0.0508197	0.0885246	0.0803279	0.0245902	0.00655738	0.0360656	0.0278689	0.00983607	0.047541	0.0557377	0.119672	0.0393443	0.0836066	0.0672131	0.0409836	0.113115	0.0147541	0.0295082	0.0540984	0.0180328	0.00983607	0.0704918	0.136066	0.0344262	0.0360656	0.0606557	0.0704918	0.0213115
FGF4	ENST00000168712.3	full-splice_match	1	0	0	3165	618	257	2290	0.504265	0.692058	0.771318	0.423581	0	0.0292683	0.0536585	0.00487805	0.0243902	0.0536585	0.0439024	0.0243902	0.0292683	0.0829268	0.0487805	0.0195122	0	0.0243902	0.0292683	0.00487805	0.0634146	0.0585366	0.0390244	0.0390244	0.0682927	0.0780488	0.0926829	0.0682927	0.0390244	0.112195	0.117073	0.0390244	0.0292683	0.0487805	0.0926829	0.0390244	0.0243902	0.0292683	0.0780488	0.0097561
NMRK2	ENST00000168977.7	full-splice_match	1	0	0	1160	690	324	146	0.628448	0.615385	0.683077	0.568493	0.00873362	0.0393013	0.069869	0.00873362	0.0611354	0.0524017	0.0436681	0.0262009	0.0611354	0.0786026	0.069869	0.0524017	0.00873362	0.0305677	0.0480349	0.00436681	0.0524017	0.0393013	0.122271	0.0480349	0.0960699	0.0917031	0.0611354	0.069869	0.00873362	0.0349345	0.0655022	0.0480349	0.0174672	0.0567686	0.0873362	0.0349345	0.0655022	0.0786026	0.0567686	0.0262009
REXO1	ENST00000170168.9	full-splice_match	1	0	0	4609	3663	125	821	0.672814	0.670945	0.857143	0.652862	0.0139344	0.0204918	0.0688525	0.00491803	0.0360656	0.0672131	0.0360656	0.0262295	0.0565574	0.0803279	0.0918033	0.0245902	0.00245902	0.0237705	0.0196721	0.0057377	0.0516393	0.0581967	0.0934426	0.0229508	0.102459	0.105738	0.0868852	0.0827869	0.0352459	0.0590164	0.0811475	0.0245902	0.0204918	0.0622951	0.0795082	0.0221311	0.0393443	0.0647541	0.0885246	0.0163934
GPATCH1	ENST00000170564.7	full-splice_match	1	0	0	3191	2793	13	385	0.47916	0.492837	0.642857	0.374026	0.0806452	0.0397849	0.111828	0.0333333	0.055914	0.0505376	0.0311828	0.0354839	0.109677	0.0634409	0.0623656	0.0451613	0.0193548	0.0408602	0.0483871	0.0322581	0.0645161	0.0516129	0.0903226	0.0247312	0.0698925	0.0387097	0.0247312	0.0580645	0.0322581	0.0225806	0.0236559	0.00860215	0.0268817	0.0451613	0.0666667	0.0526882	0.0935484	0.0623656	0.0731183	0.0569892
IL4R	ENST00000170630.6	full-splice_match	1	0	0	3380	2430	0	950	0.57574	0.59119	0	0.536842	0.0197775	0.0333745	0.0506799	0.0210136	0.0469716	0.0716934	0.00988875	0.0210136	0.0618047	0.0840544	0.0716934	0.0457355	0.0111248	0.0321384	0.0432633	0.0148331	0.0432633	0.053152	0.119901	0.0420272	0.0964153	0.0815822	0.0309023	0.105068	0.0173053	0.0173053	0.0210136	0.0197775	0.0210136	0.0593325	0.10136	0.0346106	0.0494438	0.0383189	0.0889988	0.0247219
TNS1	ENST00000171887.8	full-splice_match	1	0	0	10331	5205	453	4673	0.569935	0.602806	0.638767	0.526642	0.0196078	0.0311419	0.0461361	0.0149942	0.0478662	0.0680507	0.0213379	0.0374856	0.0495963	0.0957324	0.0605536	0.038639	0.00634371	0.0340254	0.0438293	0.0144175	0.0490196	0.0668973	0.11707	0.0490196	0.128028	0.0841984	0.038639	0.0818916	0.0207612	0.0196078	0.0455594	0.017301	0.027105	0.0732411	0.0911188	0.0369089	0.0363322	0.050173	0.0743945	0.0224913
NTN1	ENST00000173229.7	full-splice_match	1	0	0	5986	1812	139	4035	0.625626	0.660409	0.771429	0.604957	0.013267	0.0431177	0.0729685	0.00331675	0.0447761	0.0597015	0.0563847	0.0447761	0.0348259	0.0646766	0.0447761	0.0348259	0.00497512	0.0331675	0.0199005	0.0066335	0.0762852	0.0613599	0.0580431	0.0381426	0.0630182	0.0547264	0.092869	0.0713101	0.0563847	0.112769	0.0978441	0.039801	0.0232172	0.0414594	0.0995025	0.0182421	0.0348259	0.066335	0.0464345	0.0182421
TRO	ENST00000173898.12	full-splice_match	1	0	0	4634	4293	99	242	0.536685	0.544035	0.56	0.396694	0.0258741	0.0258741	0.0629371	0.0307692	0.0356643	0.079021	0.00909091	0.0496503	0.0440559	0.0965035	0.0531469	0.0734266	0.020979	0.0188811	0.0370629	0.0244755	0.0622378	0.0776224	0.129371	0.027972	0.118881	0.0391608	0.0104895	0.0433566	0.0132867	0.00979021	0.0174825	0.0034965	0.0363636	0.0482517	0.0888112	0.0594406	0.034965	0.0342657	0.0454545	0.0265734
MNT	ENST00000174618.5	full-splice_match	1	0	0	4925	1746	348	2831	0.612792	0.658453	0.618911	0.583893	0.00860585	0.0292599	0.0499139	0.0137694	0.0447504	0.0946644	0.0327022	0.0292599	0.0499139	0.104991	0.0499139	0.0223752	0.0120482	0.0275387	0.0240964	0.010327	0.0395869	0.104991	0.104991	0.0430293	0.142857	0.137694	0.0464716	0.101549	0.010327	0.0481928	0.0550775	0.0258176	0.0120482	0.0636833	0.111876	0.0189329	0.0499139	0.0413081	0.0671256	0.0120482
ASNS	ENST00000175506.8	full-splice_match	1	0	0	2356	1683	529	144	0.470289	0.431629	0.613208	0.395833	0.0571429	0.0410714	0.0839286	0.0607143	0.0517857	0.0303571	0.0125	0.0482143	0.0857143	0.0357143	0.0446429	0.0464286	0.0410714	0.0357143	0.075	0.0732143	0.0607143	0.025	0.0660714	0.0446429	0.0535714	0.0285714	0.0214286	0.0428571	0.0125	0.0160714	0.00892857	0.0160714	0.0232143	0.0357143	0.0767857	0.0535714	0.0946429	0.0339286	0.0464286	0.0767857
PTPN18	ENST00000175756.10	full-splice_match	1	0	0	3616	1380	52	2184	0.580199	0.638869	0.830189	0.537088	0.0108932	0.0152505	0.0457516	0.0130719	0.0392157	0.0501089	0.0457516	0.0348584	0.0522876	0.0566449	0.0784314	0.0326797	0.0087146	0.0261438	0.0392157	0.0130719	0.0196078	0.043573	0.0958606	0.0326797	0.0718954	0.0544662	0.0610022	0.08061	0.0261438	0.0697168	0.08061	0.0283224	0.0239651	0.0610022	0.100218	0.0239651	0.0457516	0.0762527	0.0784314	0.0326797
SCT	ENST00000176195.4	full-splice_match	1	0	0	526	363	38	125	0.707224	0.720994	0.794872	0.64	0	0.0333333	0.0166667	0	0.0333333	0.0416667	0.0333333	0.00833333	0.0416667	0.0833333	0.0666667	0	0	0.00833333	0.0333333	0	0.00833333	0.0166667	0.15	0.025	0.0666667	0.108333	0.0583333	0.116667	0.025	0.0833333	0.0833333	0.0166667	0.0166667	0.0833333	0.175	0.00833333	0.0416667	0.0583333	0.0333333	0.00833333
STK10	ENST00000176763.10	full-splice_match	1	0	0	5892	2904	182	2806	0.54854	0.580779	0.765027	0.501069	0.0341262	0.0423992	0.10031	0.0175801	0.041365	0.0589452	0.0320579	0.0217166	0.108583	0.120993	0.0744571	0.0320579	0.00930714	0.0372285	0.0506722	0.0113754	0.0661841	0.0403309	0.104447	0.0382627	0.0868666	0.0496381	0.0361944	0.0641158	0.0351603	0.041365	0.0423992	0.0144778	0.0155119	0.0455016	0.0910031	0.024819	0.0858325	0.0506722	0.122027	0.0496381
CA12	ENST00000178638.8	full-splice_match	1	0	0	6098	1062	126	4910	0.495408	0.558907	0.779528	0.474338	0.0226629	0.0424929	0.0651558	0.0226629	0.0736544	0.0566572	0.0254958	0.0339943	0.0481586	0.0594901	0.0424929	0.0594901	0.0169972	0.0339943	0.0339943	0.0396601	0.0708215	0.0594901	0.0906516	0.0509915	0.082153	0.0594901	0.0509915	0.082153	0.0169972	0.0396601	0.0368272	0.01983	0.0113314	0.0481586	0.11898	0.0453258	0.0481586	0.0538244	0.0453258	0.0254958
MTMR7	ENST00000180173.10	full-splice_match	1	0	0	5110	1980	59	3071	0.380822	0.469429	0.783333	0.315858	0.0576631	0.0440061	0.0849772	0.0546282	0.0531108	0.0409712	0.0182094	0.0440061	0.0743551	0.047041	0.0576631	0.060698	0.0349014	0.047041	0.0561457	0.060698	0.0622155	0.0379363	0.0789074	0.0561457	0.0591806	0.0364188	0.030349	0.0500759	0.0182094	0.0136571	0.0288316	0.0121396	0.0333839	0.0485584	0.0698027	0.0364188	0.0849772	0.0379363	0.0561457	0.0576631
CDK13	ENST00000181839.10	full-splice_match	1	0	0	9525	4536	386	4603	0.434751	0.522161	0.72093	0.324571	0.0615486	0.0469887	0.0787558	0.039047	0.0542687	0.0469887	0.017869	0.039047	0.067505	0.0913302	0.0635341	0.0443415	0.0337525	0.0291198	0.0416942	0.0436797	0.0555923	0.0397088	0.104567	0.0377234	0.060225	0.0344143	0.049636	0.0589014	0.0244871	0.0397088	0.0489742	0.0112508	0.0370615	0.049636	0.0641959	0.0430179	0.070814	0.0383852	0.0589014	0.0416942
TMEM131	ENST00000186436.10	full-splice_match	1	0	0	6701	5649	286	766	0.453365	0.451133	0.759582	0.355091	0.075983	0.0605739	0.0749203	0.0568544	0.0664187	0.0483528	0.0170032	0.0446334	0.0664187	0.0664187	0.0478215	0.0579171	0.0456961	0.0446334	0.0366631	0.0573858	0.0738576	0.0494155	0.0892667	0.0504782	0.0680128	0.0382572	0.0217853	0.0632306	0.0180659	0.0159405	0.0233794	0.0116897	0.0313496	0.053135	0.0483528	0.0536663	0.075983	0.0297556	0.0435707	0.0414453
PVR	ENST00000187830.2	full-splice_match	1	1	1	3132	132	183	2817	0.553959	0.694656	0.695652	0.538161	0	0.0465116	0	0	0.0465116	0.0465116	0.0232558	0.0465116	0	0.0465116	0.0465116	0	0	0	0.0930233	0	0.0232558	0.0465116	0.0465116	0.0930233	0.0930233	0.0697674	0.116279	0.0232558	0.0232558	0.139535	0.0465116	0.0232558	0.0232558	0	0.162791	0.0232558	0.0232558	0.0465116	0.0465116	0
NFKB2	ENST00000189444.11	full-splice_match	1	0	0	3012	2697	164	151	0.611554	0.612018	0.648485	0.562914	0.0167038	0.0345212	0.0501114	0.00890869	0.0501114	0.064588	0.0300668	0.0300668	0.0612472	0.0890869	0.0701559	0.032294	0.0100223	0.0256125	0.0445434	0.0155902	0.0345212	0.0567929	0.104677	0.032294	0.0812918	0.0712695	0.032294	0.0835189	0.0278396	0.0356347	0.0545657	0.0122494	0.0289532	0.0545657	0.119154	0.0289532	0.0501114	0.0601336	0.0857461	0.0378619
DMRT3	ENST00000190165.3	full-splice_match	1	0	0	2493	1416	347	730	0.56438	0.616961	0.741379	0.378082	0.0169851	0.0360934	0.0488323	0.0127389	0.0318471	0.0424628	0.0403397	0.0339703	0.0636943	0.0912951	0.0403397	0.044586	0.0106157	0.029724	0.029724	0.0127389	0.0488323	0.0403397	0.101911	0.0339703	0.07431	0.0764331	0.0828025	0.0785563	0.0360934	0.0912951	0.0467091	0.0276008	0.0169851	0.0573248	0.0912951	0.0467091	0.0424628	0.0509554	0.0679406	0.0276008
UHRF1BP1	ENST00000192788.6	full-splice_match	1	0	0	9567	4320	168	5079	0.46974	0.517712	0.751479	0.419571	0.0347464	0.0347464	0.0639333	0.0277971	0.047255	0.0493398	0.0076442	0.0423905	0.0715775	0.066713	0.0729673	0.0493398	0.018763	0.0410007	0.0583739	0.038221	0.0451703	0.0416956	0.112578	0.0583739	0.0868659	0.0555942	0.018763	0.0750521	0.00903405	0.0118138	0.0138985	0.00555942	0.0264072	0.0597637	0.086171	0.0618485	0.0660181	0.0444753	0.0660181	0.0493398
IMPG2	ENST00000193391.8	full-splice_match	1	0	0	8352	3723	203	4426	0.398108	0.44949	0.348039	0.357207	0.0483871	0.0427419	0.0709677	0.0556452	0.05	0.0419355	0.00645161	0.0564516	0.0943548	0.0532258	0.0475806	0.058871	0.0298387	0.0483871	0.0596774	0.0564516	0.0612903	0.0387097	0.0903226	0.0387097	0.0620968	0.025	0.00967742	0.0629032	0.00483871	0.00403226	0.00806452	0.0104839	0.0314516	0.0435484	0.0733871	0.066129	0.0879032	0.0387097	0.0669355	0.0572581
PCDHB4	ENST00000194152.4	full-splice_match	1	0	0	3806	2385	181	1240	0.45691	0.549497	0.445055	0.280645	0.0440806	0.0377834	0.0327456	0.0528967	0.0440806	0.0554156	0.0239295	0.0365239	0.0554156	0.0528967	0.0604534	0.0239295	0.0239295	0.0327456	0.0352645	0.0415617	0.0516373	0.0491184	0.0743073	0.0277078	0.0642317	0.0503778	0.0465995	0.0667506	0.0314861	0.0453401	0.0465995	0.0302267	0.0277078	0.0654912	0.0881612	0.0365239	0.0554156	0.0478589	0.0642317	0.0314861
PCDHB2	ENST00000194155.7	full-splice_match	1	0	0	4089	2394	176	1519	0.482759	0.567071	0.536723	0.343647	0.0351317	0.0464241	0.0313676	0.0388959	0.0514429	0.0514429	0.0351317	0.0376412	0.0577164	0.0451694	0.0690088	0.0288582	0.0175659	0.0388959	0.0263488	0.033877	0.0539523	0.0476788	0.0853199	0.0250941	0.0702635	0.0589711	0.0539523	0.0614806	0.0351317	0.0476788	0.0627353	0.033877	0.0263488	0.0514429	0.0803011	0.0401506	0.0451694	0.0564617	0.0664994	0.0351317
FAM135A	ENST00000194672.11	full-splice_match	1	1	1	5198	441	44	4713	0.350135	0.361364	0.333333	0.349247	0.0890411	0.0342466	0.0821918	0.0890411	0.0684932	0.0205479	0	0.0410959	0.0890411	0.0479452	0.0273973	0.0479452	0.00684932	0.0342466	0.10274	0.109589	0.0684932	0.0410959	0.0616438	0.0479452	0.0410959	0.0205479	0	0.0410959	0	0.00684932	0	0.00684932	0.0684932	0.0273973	0.0205479	0.0684932	0.0890411	0.0205479	0.0410959	0.0684932
SEMA5B	ENST00000195173.8	full-splice_match	1	0	0	4523	3171	399	953	0.624585	0.636593	0.745	0.534103	0.00757576	0.0454545	0.0274621	0.0151515	0.0397727	0.063447	0.0416667	0.0416667	0.0331439	0.0795455	0.0539773	0.0265152	0.00568182	0.0255682	0.0331439	0.0123106	0.0435606	0.0625	0.0918561	0.0388258	0.0842803	0.0804924	0.063447	0.0899621	0.032197	0.0587121	0.0549242	0.0350379	0.0255682	0.0568182	0.109848	0.0435606	0.0350379	0.0520833	0.0710227	0.0142045
TDRD3	ENST00000196169.7	full-splice_match	1	0	0	3019	1953	788	278	0.432594	0.404713	0.533587	0.341727	0.104615	0.06	0.109231	0.0923077	0.0615385	0.0446154	0.0138462	0.04	0.0907692	0.0538462	0.0553846	0.0538462	0.0615385	0.0507692	0.0707692	0.0507692	0.0830769	0.0338462	0.0692308	0.0384615	0.0476923	0.0123077	0.0107692	0.0446154	0.0169231	0.00307692	0.0123077	0.00769231	0.0323077	0.0323077	0.0523077	0.0384615	0.126154	0.0353846	0.0476923	0.0523077
PILRA	ENST00000198536.7	full-splice_match	1	0	0	1271	909	170	192	0.564123	0.568282	0.684211	0.4375	0.0331126	0.0430464	0.0463576	0.0231788	0.0562914	0.0794702	0.0264901	0.0397351	0.0562914	0.0827815	0.0827815	0.0331126	0.0165563	0.0397351	0.0298013	0.0198675	0.0529801	0.0860927	0.129139	0.0331126	0.115894	0.0662252	0.0231788	0.0860927	0.0198675	0.00993377	0.0298013	0.00993377	0.0298013	0.0827815	0.0927152	0.0463576	0.0463576	0.0529801	0.0695364	0.0231788
CHERP	ENST00000198939.6	full-splice_match	1	0	0	4084	2781	37	1266	0.609207	0.646763	0.789474	0.521327	0.011879	0.0323974	0.0572354	0.0107991	0.0388769	0.0669546	0.0334773	0.0280778	0.0518359	0.116631	0.0561555	0.0313175	0.00215983	0.037797	0.0421166	0.00431965	0.0485961	0.062635	0.133909	0.0388769	0.116631	0.115551	0.0712743	0.074514	0.0388769	0.0647948	0.0550756	0.0183585	0.0226782	0.0647948	0.0712743	0.0367171	0.0464363	0.0475162	0.0637149	0.0313175
MAP2	ENST00000199940.10	full-splice_match	1	0	0	2241	1677	440	124	0.489067	0.504177	0.480726	0.314516	0.0645161	0.046595	0.09319	0.0430108	0.0698925	0.0663082	0.016129	0.0376344	0.0842294	0.0770609	0.0770609	0.0376344	0.0215054	0.0501792	0.0340502	0.0376344	0.0806452	0.062724	0.111111	0.046595	0.0878136	0.0376344	0.0125448	0.0663082	0.016129	0.0143369	0.0215054	0.0107527	0.0340502	0.0770609	0.0663082	0.0358423	0.0663082	0.046595	0.0537634	0.0412186
ITGB4	ENST00000200181.8	full-splice_match	1	0	0	5896	5466	164	266	0.635855	0.633303	0.757576	0.612782	0.00713893	0.0329489	0.0433828	0.00878638	0.0483251	0.0730368	0.0384404	0.0389896	0.0450302	0.07743	0.0653487	0.0269083	0.00329489	0.0345964	0.0378913	0.00823723	0.0450302	0.0730368	0.088413	0.0400879	0.0928062	0.0763317	0.0609555	0.0867655	0.0351455	0.0433828	0.0642504	0.0269083	0.0280066	0.0549149	0.111477	0.0285557	0.0340472	0.0642504	0.07743	0.02581
ADAM11	ENST00000200557.11	full-splice_match	1	0	0	4614	2307	212	2095	0.624837	0.630095	0.84507	0.596659	0.015625	0.0442708	0.0351562	0.00651042	0.0364583	0.0768229	0.0403646	0.0286458	0.03125	0.0716146	0.0716146	0.0351562	0.00651042	0.0273438	0.0364583	0.00911458	0.0455729	0.0546875	0.0911458	0.0416667	0.0846354	0.0585938	0.046875	0.078125	0.0286458	0.0377604	0.0651042	0.0208333	0.0208333	0.0572917	0.125	0.03125	0.03125	0.0598958	0.0729167	0.0260417
SULT2B1	ENST00000201586.7	full-splice_match	1	0	0	1196	1095	81	20	0.617893	0.616088	0.707317	0.35	0.0137363	0.0247253	0.0686813	0.00824176	0.0412088	0.0769231	0.0274725	0.032967	0.0494505	0.0851648	0.0631868	0.0192308	0.00274725	0.0686813	0.032967	0.010989	0.0521978	0.0521978	0.0851648	0.0467033	0.107143	0.0961538	0.0686813	0.0961538	0.0412088	0.0357143	0.0576923	0.0302198	0.021978	0.0576923	0.0741758	0.0576923	0.0412088	0.0659341	0.0604396	0.0467033
EPS8L1	ENST00000201647.11	full-splice_match	1	0	0	2569	2169	88	312	0.660179	0.668358	0.651685	0.605769	0.0152355	0.0221607	0.0387812	0.0110803	0.0360111	0.0581717	0.0360111	0.0180055	0.0387812	0.0941828	0.0844875	0.0360111	0.00692521	0.0221607	0.0263158	0.00831025	0.0304709	0.0429363	0.106648	0.0193906	0.0623269	0.0720222	0.0969529	0.0526316	0.0429363	0.0872576	0.0858726	0.0360111	0.00692521	0.0554017	0.101108	0.0180055	0.0387812	0.065097	0.102493	0.0235457
DNMT3B	ENST00000201963.3	full-splice_match	1	0	0	4255	2535	264	1456	0.52785	0.563141	0.630189	0.447802	0.0367299	0.042654	0.0722749	0.028436	0.0580569	0.0462085	0.0331754	0.0343602	0.056872	0.0675355	0.0781991	0.0367299	0.0189573	0.0319905	0.0580569	0.0154028	0.0627962	0.0450237	0.0841232	0.042654	0.0734597	0.0509479	0.0473934	0.0545024	0.049763	0.0308057	0.0319905	0.0225118	0.0201422	0.0521327	0.0758294	0.042654	0.0699052	0.0580569	0.0699052	0.0402844
EPB41L1	ENST00000202028.9	full-splice_match	1	0	0	3514	2337	173	1004	0.538702	0.57363	0.551724	0.455179	0.0308483	0.0372751	0.0745501	0.0179949	0.0475578	0.066838	0.0218509	0.0359897	0.0861183	0.0732648	0.0848329	0.0308483	0.0128535	0.0501285	0.0539846	0.0154242	0.0655527	0.0488432	0.0848329	0.0526992	0.0976864	0.059126	0.0449871	0.0681234	0.0218509	0.0244216	0.0539846	0.0102828	0.0244216	0.0526992	0.0899743	0.033419	0.0552699	0.0616967	0.101542	0.0488432
PPP1R13B	ENST00000202556.14	full-splice_match	1	0	0	5500	3270	268	1962	0.545455	0.546956	0.810409	0.506626	0.0505051	0.0633609	0.0734619	0.0385675	0.056933	0.0587695	0.0339761	0.0348944	0.0615243	0.087236	0.0606061	0.040404	0.0174472	0.0321396	0.0477502	0.0284665	0.0642792	0.0596878	0.107438	0.0348944	0.10101	0.0642792	0.0394858	0.0596878	0.0275482	0.0293848	0.0312213	0.0257117	0.0192837	0.0449954	0.0835629	0.0284665	0.0853994	0.0358127	0.0560147	0.0358127
RALGAPA2	ENST00000202677.12	full-splice_match	1	0	0	9545	5619	164	3762	0.481718	0.467426	0.8	0.489102	0.053953	0.0416667	0.0785256	0.0518162	0.0502137	0.0475427	0.0144231	0.0470085	0.0753205	0.0587607	0.0528846	0.0464744	0.0347222	0.036859	0.0630342	0.0502137	0.0555556	0.0448718	0.0801282	0.0480769	0.0657051	0.0325855	0.0181624	0.0566239	0.0240385	0.0117521	0.0138889	0.0117521	0.0240385	0.0528846	0.0753205	0.0518162	0.0854701	0.0395299	0.0598291	0.0523504
TRMT6	ENST00000203001.7	full-splice_match	1	0	0	2929	1491	128	1310	0.418573	0.45302	0.72093	0.349618	0.0927419	0.0604839	0.0927419	0.0564516	0.0705645	0.0383065	0.0201613	0.0383065	0.106855	0.0564516	0.0584677	0.046371	0.0322581	0.0342742	0.0584677	0.0483871	0.0665323	0.0322581	0.0846774	0.0443548	0.0564516	0.0302419	0.0221774	0.0322581	0.0201613	0.00806452	0.016129	0.0201613	0.0282258	0.0302419	0.0645161	0.0383065	0.104839	0.0443548	0.0745968	0.0403226
GMIP	ENST00000203556.9	full-splice_match	1	0	0	3528	2910	128	490	0.632086	0.640426	0.782946	0.542857	0.00928793	0.0237358	0.0474716	0.00825593	0.0381837	0.0619195	0.0278638	0.0392157	0.0567595	0.0949432	0.0743034	0.0340557	0.00206398	0.0237358	0.0268318	0.0123839	0.0340557	0.0515996	0.116615	0.0237358	0.0939112	0.0939112	0.0474716	0.0866873	0.0340557	0.0526316	0.0577915	0.0154799	0.0196078	0.0588235	0.108359	0.0350877	0.0412797	0.0691434	0.0928793	0.0257998
LAG3	ENST00000203629.3	full-splice_match	1	0	0	1976	1575	333	68	0.640182	0.647395	0.622754	0.558824	0.00381679	0.019084	0.0229008	0.0114504	0.028626	0.0458015	0.0133588	0.0362595	0.0362595	0.101145	0.0667939	0.0267176	0.00572519	0.0324427	0.019084	0.00954198	0.0305344	0.0400763	0.112595	0.028626	0.0839695	0.103053	0.0744275	0.112595	0.0229008	0.0515267	0.0496183	0.00763359	0.0114504	0.0839695	0.118321	0.0572519	0.0209924	0.0496183	0.0839695	0.019084
LTBP4	ENST00000204005.13	full-splice_match	1	0	0	5032	4761	0	271	0.666534	0.667227	0	0.656827	0.00567465	0.0271122	0.0189155	0.0113493	0.0290038	0.0624212	0.0435057	0.0321564	0.0302648	0.0529634	0.0580076	0.0290038	0.00189155	0.017024	0.0409836	0.00567465	0.0214376	0.0630517	0.07314	0.019546	0.0725095	0.0964691	0.0907945	0.0889029	0.0498108	0.0687264	0.0832282	0.0302648	0.0245902	0.0535939	0.12169	0.0340479	0.0334174	0.0498108	0.0737705	0.0264817
PDCD7	ENST00000204549.9	full-splice_match	1	0	0	2823	1455	27	1341	0.541977	0.65337	0.464286	0.422819	0.0413223	0.0309917	0.0557851	0.0103306	0.0144628	0.0330579	0.0227273	0.0289256	0.0619835	0.0681818	0.0743802	0.0247934	0.00206612	0.0247934	0.0227273	0.0227273	0.0268595	0.0206612	0.0743802	0.0247934	0.0599174	0.0743802	0.121901	0.0764463	0.0454545	0.115702	0.0950413	0.0103306	0.0123967	0.0599174	0.0867769	0.0392562	0.0661157	0.0289256	0.0950413	0.0268595
FLT3LG	ENST00000204637.6	full-splice_match	1	0	0	1046	459	346	241	0.636711	0.672489	0.648415	0.551867	0.00657895	0.0263158	0.0263158	0.00657895	0.0394737	0.0460526	0.0131579	0.0460526	0.0460526	0.0921053	0.0460526	0.0197368	0.00657895	0.0131579	0.0197368	0	0.0394737	0.0592105	0.0986842	0.0131579	0.0723684	0.138158	0.0723684	0.118421	0.0197368	0.0657895	0.0394737	0.0263158	0.00657895	0.0789474	0.171053	0.0460526	0.0197368	0.0526316	0.0789474	0.0197368
GOLGA3	ENST00000204726.9	full-splice_match	1	0	0	9426	4494	726	4206	0.544876	0.5927	0.661623	0.473609	0.0414162	0.0400802	0.0835003	0.0146961	0.0480962	0.0414162	0.0334001	0.0240481	0.0875084	0.112892	0.12024	0.0367401	0.00801603	0.0233801	0.0347361	0.011356	0.0480962	0.0394122	0.154309	0.0240481	0.0728123	0.0440882	0.0354041	0.0634603	0.0347361	0.0367401	0.0447562	0.0167001	0.0133601	0.0494322	0.0908484	0.0307281	0.0814963	0.0574482	0.112892	0.0327321
GLG1	ENST00000205061.9	full-splice_match	1	0	0	8261	3609	20	4632	0.500666	0.507761	0.666667	0.494387	0.0499168	0.0399334	0.0815308	0.0374376	0.0557404	0.0449251	0.0191348	0.031614	0.078203	0.0740433	0.0615641	0.0449251	0.0257903	0.0457571	0.0549085	0.0432612	0.0540765	0.0349418	0.0948419	0.0424293	0.0549085	0.030782	0.0382696	0.0499168	0.0183028	0.0274542	0.0374376	0.015807	0.0199667	0.030782	0.0923461	0.0391015	0.0732113	0.0490849	0.0748752	0.0673877
PLEKHG2	ENST00000205135.8	full-splice_match	1	0	0	4209	3761	0	448	0.590402	0.604787	0	0.470982	0.0159659	0.0279404	0.0518893	0.0127728	0.0455029	0.0638638	0.0175625	0.029537	0.0526876	0.0949973	0.0846195	0.0223523	0.00798297	0.0311336	0.0303353	0.0223523	0.0455029	0.0654604	0.115753	0.043108	0.126131	0.0822246	0.0311336	0.100585	0.0231506	0.0231506	0.0391166	0.0159659	0.0207557	0.0638638	0.104577	0.043108	0.0439063	0.0407131	0.0742416	0.0279404
DLL3	ENST00000205143.4	full-splice_match	1	0	0	2332	1854	7	471	0.648799	0.696168	0.625	0.462845	0.00324149	0.012966	0.0113452	0.00972447	0.0162075	0.0502431	0.0372771	0.0275527	0.0291734	0.0534846	0.0470016	0.012966	0.00162075	0.0145867	0.0291734	0.00972447	0.0145867	0.0470016	0.0583468	0.0178282	0.0421394	0.0923825	0.110211	0.102107	0.0307942	0.121556	0.095624	0.0356564	0.0226904	0.0713128	0.12966	0.0437601	0.0178282	0.0534846	0.0615883	0.0243112
AASDH	ENST00000205214.11	full-splice_match	1	0	0	3581	3294	172	115	0.39542	0.396295	0.49711	0.217391	0.0729262	0.0464904	0.0656335	0.0692799	0.0610757	0.0309936	0.00546946	0.0610757	0.064722	0.0309936	0.0373747	0.0628988	0.0401094	0.0492252	0.0619872	0.0783956	0.0574294	0.0337284	0.0665451	0.0610757	0.0446673	0.0118505	0.00911577	0.0328168	0.0100273	0.00182315	0.00638104	0.00911577	0.030082	0.047402	0.0601641	0.071103	0.0847767	0.0319052	0.0437557	0.0492252
ABCC6	ENST00000205557.12	full-splice_match	1	0	0	5140	4509	60	571	0.595136	0.606034	0.622951	0.50613	0.0186418	0.0226365	0.0426099	0.011984	0.0339547	0.0519308	0.0246338	0.0286285	0.0519308	0.0652463	0.0758988	0.0292943	0.00665779	0.0339547	0.0312916	0.0133156	0.0312916	0.045273	0.109854	0.0386152	0.0845539	0.0605859	0.0306258	0.111185	0.0153129	0.0272969	0.039281	0.0226365	0.0213049	0.0792277	0.13715	0.0399467	0.0426099	0.045273	0.063249	0.0286285
CCDC80	ENST00000206423.8	full-splice_match	1	0	0	12301	2850	828	8623	0.427526	0.530011	0.45959	0.390583	0.0442571	0.0421496	0.0906217	0.0347734	0.0432034	0.0632244	0.0189673	0.032666	0.100105	0.0695469	0.0906217	0.0400421	0.0126449	0.0410959	0.0684932	0.0179136	0.0642782	0.0474183	0.0927292	0.0379347	0.100105	0.0579557	0.0252898	0.0558483	0.0210748	0.0168599	0.028451	0.0168599	0.0273973	0.0442571	0.0632244	0.0358272	0.0864067	0.0432034	0.100105	0.0453109
TGM1	ENST00000206765.11	full-splice_match	1	0	0	2744	2451	91	202	0.587099	0.588163	0.586957	0.574257	0.00857843	0.0318627	0.0367647	0.0220588	0.0453431	0.0661765	0.0392157	0.0330882	0.0514706	0.0551471	0.0625	0.0453431	0.0110294	0.0441176	0.0637255	0.0171569	0.0453431	0.057598	0.10049	0.0526961	0.0882353	0.0551471	0.0416667	0.060049	0.0257353	0.0330882	0.0465686	0.0232843	0.0220588	0.0563725	0.0833333	0.0379902	0.0428922	0.0588235	0.0661765	0.0441176
UNC13D	ENST00000207549.9	full-splice_match	1	0	0	4080	3270	67	743	0.629167	0.630468	0.602941	0.625841	0.00734619	0.0220386	0.0413223	0.010101	0.0394858	0.0716253	0.0229568	0.0293848	0.0486685	0.0899908	0.0826446	0.0275482	0.00642792	0.0367309	0.0321396	0.0110193	0.0348944	0.0642792	0.117539	0.0449954	0.0964187	0.0716253	0.056933	0.0955005	0.0284665	0.0422406	0.040404	0.0137741	0.0137741	0.0560147	0.134068	0.0376492	0.0339761	0.0514233	0.0863177	0.0275482
COMT	ENST00000207636.9	full-splice_match	1	1	1	1319	597	165	557	0.583017	0.625839	0.584337	0.536804	0.00505051	0.030303	0.0505051	0	0.040404	0.0505051	0.030303	0.030303	0.0353535	0.0757576	0.0808081	0.0151515	0	0.0555556	0.030303	0.0151515	0.030303	0.0606061	0.0757576	0.0656566	0.0707071	0.0505051	0.040404	0.0707071	0.030303	0.0454545	0.0252525	0.0454545	0.0151515	0.030303	0.176768	0.0151515	0.0505051	0.0454545	0.0757576	0.030303
PTBP3	ENST00000210227.4	full-splice_match	1	0	0	734	548	186	0	0.510899	0.451554	0.684492	0	0.0440367	0.0275229	0.0715596	0.0825688	0.0330275	0.0495413	0.0165138	0.0495413	0.0440367	0.066055	0.0440367	0.0275229	0.0220183	0.0605505	0.0605505	0.0605505	0.0495413	0.0385321	0.0605505	0.0440367	0.0605505	0.0385321	0.0275229	0.093578	0.0275229	0.0110092	0.0110092	0.0220183	0.0550459	0.0550459	0.0770642	0.0990826	0.0880734	0.0330275	0.0385321	0.0330275
PRRT1	ENST00000211413.10	full-splice_match	1	0	0	1892	918	112	862	0.645349	0.699019	0.699115	0.581206	0.00327869	0.0131148	0.00655738	0.00327869	0.0262295	0.0885246	0.0393443	0.052459	0.0196721	0.0360656	0.052459	0.0163934	0.00655738	0.0491803	0.0196721	0.00327869	0.00655738	0.104918	0.0754098	0.0622951	0.114754	0.144262	0.131148	0.0885246	0.0327869	0.131148	0.0590164	0.0196721	0.0295082	0.0688525	0.0852459	0.0557377	0.0163934	0.0360656	0.0327869	0.00983607
ZNF184	ENST00000211936.10	full-splice_match	1	0	0	3101	2253	285	563	0.407933	0.41119	0.583916	0.305506	0.105333	0.0666667	0.0746667	0.084	0.052	0.0533333	0.008	0.0573333	0.0906667	0.064	0.0333333	0.044	0.056	0.056	0.072	0.0426667	0.06	0.0293333	0.08	0.084	0.052	0.0266667	0.00666667	0.0626667	0.00933333	0.00266667	0.00933333	0.00266667	0.02	0.0466667	0.044	0.0653333	0.12	0.032	0.0666667	0.028
VCL	ENST00000211998.10	full-splice_match	1	0	0	5497	3402	92	2003	0.492814	0.523964	0.709677	0.429855	0.0511915	0.0450132	0.0829656	0.0370697	0.0379523	0.0564872	0.0150044	0.0344219	0.082083	0.0741395	0.0750221	0.0326567	0.015887	0.0423654	0.0661959	0.0397176	0.0661959	0.0353045	0.0997352	0.038835	0.082083	0.0255958	0.0326567	0.0538394	0.0264784	0.0150044	0.0317741	0.0132392	0.0203001	0.0626655	0.0829656	0.0344219	0.0723742	0.0450132	0.0679612	0.070609
SIRT1	ENST00000212015.11	full-splice_match	1	0	0	4107	2241	66	1800	0.406379	0.474107	0.701493	0.311111	0.0589812	0.0428954	0.0737265	0.0603217	0.0455764	0.0375335	0.0160858	0.0375335	0.0924933	0.038874	0.0616622	0.0482574	0.0428954	0.0348525	0.0656836	0.0630027	0.0549598	0.0281501	0.0656836	0.038874	0.0589812	0.0268097	0.0268097	0.0442359	0.0268097	0.0174263	0.0563003	0.00670241	0.0214477	0.0335121	0.0576408	0.0455764	0.0884718	0.0402145	0.0697051	0.0670241
TGFBR3	ENST00000212355.9	full-splice_match	1	0	0	6339	2553	387	3399	0.430667	0.497649	0.615979	0.359223	0.0364706	0.04	0.0741176	0.0482353	0.0529412	0.04	0.0164706	0.04	0.0729412	0.0588235	0.0529412	0.0388235	0.0294118	0.0494118	0.0564706	0.04	0.0564706	0.0529412	0.0858824	0.0435294	0.0776471	0.0505882	0.0141176	0.08	0.0105882	0.0105882	0.0176471	0.0129412	0.0294118	0.0505882	0.0858824	0.0529412	0.0776471	0.0305882	0.0541176	0.0564706
MZF1	ENST00000215057.7	full-splice_match	1	0	0	2666	2202	321	143	0.663916	0.674239	0.652174	0.531469	0.00545703	0.0150068	0.0313779	0.00409277	0.0272851	0.0600273	0.0354707	0.0163711	0.047749	0.0995907	0.0763984	0.0327422	0	0.0300136	0.0231924	0.00409277	0.0231924	0.0750341	0.113233	0.0245566	0.095498	0.0750341	0.0695771	0.0873124	0.042292	0.0873124	0.0709413	0.0245566	0.0177353	0.0491132	0.100955	0.0381992	0.0245566	0.0272851	0.100955	0.0218281
STX1B	ENST00000215095.11	full-splice_match	1	0	0	4674	864	242	3568	0.591142	0.542294	0.802469	0.588565	0.0418118	0.0487805	0.087108	0.0278746	0.0592334	0.0627178	0.0348432	0.0383275	0.0940767	0.0731707	0.0696864	0.0278746	0.0139373	0.0731707	0.0627178	0.0278746	0.0662021	0.0487805	0.0627178	0.0731707	0.0766551	0.0209059	0.0452962	0.010453	0.0418118	0.0383275	0.0487805	0.0243902	0.00348432	0.0209059	0.0836237	0.0174216	0.0905923	0.0836237	0.108014	0.0696864
EFNA2	ENST00000215368.4	full-splice_match	1	0	0	2424	639	296	1489	0.642739	0.688088	0.868687	0.57824	0	0.0330189	0.0188679	0.0141509	0.0188679	0.0660377	0.0707547	0.0424528	0.00943396	0.0613208	0.0330189	0.0235849	0.00471698	0.0235849	0.0235849	0.00471698	0.0471698	0.0518868	0.0424528	0.0330189	0.0660377	0.0896226	0.141509	0.0754717	0.0518868	0.160377	0.0849057	0.0235849	0.0377358	0.0754717	0.113208	0.0330189	0.0141509	0.0566038	0.0613208	0
MISP	ENST00000215582.8	full-splice_match	1	0	0	2885	2037	117	731	0.629463	0.650786	0.652542	0.566347	0.0117994	0.0280236	0.0471976	0.00884956	0.0412979	0.0678466	0.0353982	0.0235988	0.0678466	0.0781711	0.10472	0.0309735	0.00737463	0.0353982	0.0309735	0.00589971	0.0427729	0.0575221	0.128319	0.039823	0.116519	0.0914454	0.0545723	0.0663717	0.019174	0.0339233	0.060472	0.0368732	0.0132743	0.0560472	0.0811209	0.0162242	0.0412979	0.0589971	0.0988201	0.0294985
POLR2E	ENST00000215587.11	full-splice_match	1	1	1	1286	612	59	615	0.628305	0.608838	0.8	0.630894	0.0147783	0.0197044	0.0591133	0.00985222	0.044335	0.0788177	0.0541872	0.00985222	0.0492611	0.0935961	0.08867	0.0295567	0.00985222	0.0689655	0.0344828	0	0.0591133	0.0492611	0.0985222	0.0689655	0.0935961	0.0738916	0.0541872	0.0394089	0.0541872	0.0295567	0.0394089	0.0344828	0.0147783	0.0394089	0.0935961	0.0147783	0.0197044	0.0935961	0.103448	0.0295567
MADCAM1	ENST00000215637.8	full-splice_match	1	0	0	1541	1146	14	381	0.662557	0.717904	0.6	0.498688	0.00787402	0.015748	0.015748	0	0.0393701	0.0918635	0.0314961	0.0131234	0.0104987	0.0708661	0.0787402	0.0209974	0	0.0131234	0.00262467	0.00262467	0.0183727	0.0761155	0.0997375	0.00262467	0.102362	0.128609	0.0971129	0.128609	0.023622	0.0708661	0.0892388	0.0314961	0.00524934	0.102362	0.11811	0.0262467	0.0104987	0.0708661	0.0656168	0.0131234
RNF215	ENST00000215798.10	full-splice_match	1	0	0	1651	1027	0	624	0.616596	0.634503	1	0.586538	0.00878906	0.0234375	0.0322266	0.0117188	0.0205078	0.0556641	0.0234375	0.0263672	0.0439453	0.0615234	0.0849609	0.0322266	0.0117188	0.0322266	0.0322266	0.0146484	0.0351562	0.0410156	0.117188	0.0263672	0.0878906	0.0673828	0.0410156	0.111328	0.0234375	0.0322266	0.0556641	0.0322266	0.0146484	0.0703125	0.143555	0.0292969	0.0234375	0.0498047	0.0673828	0.0380859
MORC2	ENST00000215862.8	full-splice_match	1	0	0	4469	2910	1364	195	0.487357	0.543486	0.372161	0.45641	0.0340557	0.0402477	0.0939112	0.0278638	0.0526316	0.0598555	0.0196078	0.0350877	0.0856553	0.0722394	0.0825593	0.0392157	0.0134159	0.0443756	0.0485036	0.0278638	0.0619195	0.0495356	0.0835913	0.0464396	0.0794634	0.0474716	0.0330237	0.0712074	0.0196078	0.0247678	0.0350877	0.0196078	0.0216718	0.0557276	0.0815273	0.0257998	0.0918473	0.0526316	0.0908153	0.0454076
PLA2G3	ENST00000215885.4	full-splice_match	1	0	0	2600	1527	154	919	0.585385	0.62713	0.664516	0.50272	0.0137795	0.0334646	0.0314961	0.00787402	0.0531496	0.0649606	0.011811	0.0413386	0.0472441	0.0905512	0.0885827	0.0255906	0.00393701	0.0255906	0.0413386	0.00787402	0.0393701	0.0688976	0.127953	0.0374016	0.108268	0.0826772	0.0452756	0.0885827	0.023622	0.0314961	0.0275591	0.0137795	0.019685	0.0669291	0.110236	0.0433071	0.0275591	0.0413386	0.0826772	0.0295276
PDXP	ENST00000215904.7	full-splice_match	1	0	0	2012	888	60	1064	0.649105	0.732807	0.852459	0.567669	0	0.0135593	0.0135593	0	0.0237288	0.0542373	0.0474576	0.0237288	0.0305085	0.0847458	0.040678	0.0135593	0	0.0135593	0.0169492	0.00338983	0.0169492	0.0440678	0.0542373	0.0271186	0.0372881	0.0610169	0.111864	0.0745763	0.0644068	0.145763	0.108475	0.0338983	0.0237288	0.0440678	0.111864	0.0338983	0.0101695	0.0779661	0.0881356	0
PIK3IP1	ENST00000215912.10	full-splice_match	1	0	0	2420	789	144	1487	0.543802	0.619289	0.558621	0.502354	0.0229008	0.0381679	0.0419847	0.0114504	0.0305344	0.0687023	0.0305344	0.0343511	0.0648855	0.0572519	0.0763359	0.0229008	0	0.0419847	0.0419847	0.0229008	0.0343511	0.0381679	0.103053	0.0381679	0.0839695	0.0572519	0.0458015	0.0992366	0.0229008	0.0305344	0.0648855	0.0267176	0.0229008	0.0610687	0.110687	0.0229008	0.0572519	0.0534351	0.0725191	0.0458015
PATZ1	ENST00000215919.3	full-splice_match	1	0	0	2516	1611	174	731	0.603339	0.619876	0.725714	0.53762	0.0149254	0.0317164	0.0373134	0.00932836	0.0354478	0.0522388	0.0298507	0.0335821	0.0335821	0.0858209	0.0615672	0.0186567	0.00746269	0.0410448	0.0391791	0.011194	0.0429104	0.0391791	0.0951493	0.0485075	0.0820896	0.0727612	0.0559701	0.0802239	0.0317164	0.0391791	0.0746269	0.016791	0.0205224	0.0410448	0.0951493	0.0634328	0.0279851	0.0541045	0.0597015	0.0261194
MICALL1	ENST00000215957.10	full-splice_match	1	0	0	4710	2589	126	1995	0.617622	0.636012	0.84252	0.579449	0.0185615	0.0313225	0.0707657	0.0104408	0.0290023	0.0742459	0.0208817	0.025522	0.0649652	0.114849	0.0881671	0.0243619	0.00464037	0.0232019	0.0382831	0.00580046	0.0533643	0.0591647	0.118329	0.0278422	0.11949	0.0881671	0.0522042	0.0962877	0.0185615	0.0452436	0.0429234	0.0174014	0.0174014	0.049884	0.111369	0.025522	0.0533643	0.0417633	0.0939675	0.025522
CENPM	ENST00000215980.10	full-splice_match	1	0	0	938	540	76	322	0.597015	0.608534	0.649351	0.565217	0.0223464	0.0167598	0.0502793	0.0223464	0.0446927	0.0502793	0.0167598	0.027933	0.0335196	0.0726257	0.0670391	0.0223464	0.00558659	0.0335196	0.027933	0.0111732	0.027933	0.0726257	0.0726257	0.0223464	0.0726257	0.0726257	0.0335196	0.100559	0.0167598	0.0335196	0.0502793	0.0223464	0.0111732	0.0726257	0.156425	0.0502793	0.0558659	0.0335196	0.0614525	0.027933
DMC1	ENST00000216024.7	full-splice_match	1	0	0	2269	1020	174	1075	0.408991	0.429833	0.571429	0.362791	0.0678466	0.0560472	0.0943953	0.0737463	0.0530973	0.0412979	0.0176991	0.0501475	0.0943953	0.0530973	0.0678466	0.0412979	0.0383481	0.0471976	0.0678466	0.0766962	0.0855457	0.020649	0.079646	0.0471976	0.0678466	0.0176991	0.0147493	0.020649	0.020649	0.00884956	0.00884956	0.020649	0.0235988	0.0265487	0.0530973	0.0501475	0.109145	0.0471976	0.0589971	0.0707965
RSPH14	ENST00000216036.9	full-splice_match	1	0	0	1188	1044	94	50	0.569865	0.579099	0.557895	0.4	0.0230548	0.0317003	0.074928	0.0144092	0.0403458	0.0489914	0.0259366	0.0230548	0.054755	0.0778098	0.0893372	0.037464	0.0230548	0.0518732	0.0605187	0.0144092	0.0489914	0.0461095	0.0864553	0.0893372	0.0979827	0.0720461	0.037464	0.0951009	0.0288184	0.0345821	0.0230548	0.0172911	0.0144092	0.0403458	0.103746	0.037464	0.0605187	0.037464	0.0806916	0.0259366
JOSD1	ENST00000216039.9	full-splice_match	1	0	0	3648	606	680	2362	0.501096	0.52562	0.528634	0.486876	0.0597015	0.0547264	0.0646766	0.039801	0.0497512	0.0447761	0.0248756	0.0547264	0.0746269	0.0646766	0.0845771	0.0199005	0.00995025	0.039801	0.079602	0.0298507	0.0746269	0.0547264	0.0746269	0.0646766	0.0746269	0.0447761	0.0149254	0.0547264	0.039801	0.0199005	0.00995025	0.00995025	0.039801	0.0646766	0.0696517	0.0248756	0.0696517	0.0348259	0.0945274	0.039801
PPP6R2	ENST00000216061.9	full-splice_match	1	0	0	3415	2898	370	147	0.572474	0.599931	0.415094	0.428571	0.0145078	0.0321244	0.0518135	0.0145078	0.0528497	0.0466321	0.0331606	0.0393782	0.0569948	0.0901554	0.0860104	0.0373057	0.00725389	0.0300518	0.0497409	0.00621762	0.0373057	0.0518135	0.124352	0.042487	0.0787565	0.0580311	0.0476684	0.0642487	0.0279793	0.0404145	0.0362694	0.0176166	0.00829016	0.0549223	0.105699	0.0393782	0.053886	0.0766839	0.0870466	0.0321244
LMF2	ENST00000216080.5	full-splice_match	1	0	0	2658	2046	169	443	0.65237	0.656724	0.647059	0.634312	0.00440529	0.0161527	0.0352423	0.00146843	0.0249633	0.0646109	0.0381791	0.0484581	0.0293686	0.0734214	0.0543319	0.0293686	0	0.0146843	0.0146843	0.00881057	0.030837	0.0778267	0.0895742	0.0161527	0.0954479	0.0910426	0.0602056	0.117474	0.0220264	0.071953	0.0337739	0.0190896	0.0323054	0.0528634	0.173275	0.0352423	0.020558	0.0499266	0.0543319	0.0132159
CBX6	ENST00000216083.6	full-splice_match	1	0	0	3191	1182	26	1983	0.634284	0.678239	0.62963	0.608169	0.0178117	0.0279898	0.0687023	0.0127226	0.0330789	0.0559796	0.0229008	0.0178117	0.0330789	0.0941476	0.0559796	0.0229008	0.00254453	0.0407125	0.0178117	0.0127226	0.0636132	0.0458015	0.0534351	0.0356234	0.0534351	0.117048	0.127226	0.0916031	0.0585242	0.109415	0.0763359	0.0254453	0.00763359	0.0661578	0.0966921	0.0178117	0.0458015	0.0407125	0.0737913	0.0178117
APOBEC3D	ENST00000216099.13	full-splice_match	1	0	0	2515	1158	393	964	0.517694	0.510804	0.563452	0.507261	0.0597403	0.0493506	0.0545455	0.0337662	0.0493506	0.0623377	0.025974	0.0545455	0.0545455	0.0337662	0.0701299	0.0181818	0.0181818	0.0493506	0.0519481	0.0363636	0.0441558	0.0571429	0.0675325	0.0493506	0.0571429	0.0415584	0.0441558	0.0623377	0.038961	0.0233766	0.0233766	0.012987	0.0493506	0.0415584	0.0779221	0.0727273	0.0779221	0.0363636	0.0571429	0.0467532
HMGXB4	ENST00000216106.6	full-splice_match	1	0	0	4095	1803	133	2159	0.428571	0.471143	0.626866	0.380732	0.0933333	0.04	0.125	0.025	0.0633333	0.04	0.01	0.0483333	0.111667	0.0716667	0.0566667	0.0516667	0.0183333	0.0383333	0.04	0.0366667	0.0566667	0.0533333	0.08	0.0466667	0.07	0.0416667	0.0116667	0.0566667	0.01	0.00833333	0.0116667	0.0116667	0.025	0.0533333	0.08	0.05	0.12	0.0433333	0.065	0.0383333
ARSA	ENST00000216124.10	full-splice_match	1	0	0	4294	1527	373	2394	0.598975	0.655963	0.692513	0.548037	0.00590551	0.015748	0.019685	0.00590551	0.0255906	0.0866142	0.023622	0.0314961	0.0334646	0.0472441	0.0570866	0.015748	0.00590551	0.023622	0.0413386	0.00590551	0.023622	0.0492126	0.0807087	0.0374016	0.0905512	0.122047	0.0649606	0.122047	0.0295276	0.0354331	0.0492126	0.0255906	0.0334646	0.0610236	0.153543	0.0492126	0.0177165	0.0688976	0.0433071	0.0216535
RASD2	ENST00000216127.5	full-splice_match	1	0	0	3447	798	679	1970	0.609806	0.604768	0.744118	0.565482	0.00377358	0.045283	0.0754717	0.00377358	0.0490566	0.0679245	0.0415094	0.0226415	0.0566038	0.0490566	0.0716981	0.0301887	0.0150943	0.045283	0.0566038	0	0.0792453	0.0490566	0.0641509	0.0679245	0.10566	0.0528302	0.0603774	0.0792453	0.0490566	0.0792453	0.0415094	0.0301887	0.0113208	0.0490566	0.0716981	0.0528302	0.0377358	0.0490566	0.0679245	0.0377358
CBX7	ENST00000216133.10	full-splice_match	1	0	0	4111	753	236	3122	0.593043	0.655585	0.797468	0.56246	0.02	0.012	0.1	0	0.036	0.068	0.02	0.008	0.06	0.1	0.096	0.04	0.004	0.032	0.016	0	0.052	0.052	0.064	0.036	0.068	0.092	0.08	0.084	0.052	0.052	0.06	0.032	0.004	0.048	0.096	0.036	0.056	0.052	0.12	0.008
CABP7	ENST00000216144.4	full-splice_match	1	0	0	3334	645	422	2267	0.626575	0.588509	0.825059	0.600353	0.0046729	0.0280374	0.046729	0.0046729	0.046729	0.0700935	0.0327103	0.0280374	0.046729	0.0700935	0.0654206	0.0373832	0.00934579	0.0654206	0.0700935	0.0046729	0.046729	0.046729	0.0654206	0.102804	0.0841121	0.0420561	0.0560748	0.046729	0.0373832	0.0373832	0.0607477	0.0280374	0.00934579	0.0373832	0.088785	0.046729	0.0327103	0.0794393	0.107477	0.0420561
PNPLA5	ENST00000216177.9	full-splice_match	1	0	0	2540	1287	133	1120	0.614173	0.625194	0.716418	0.589286	0.0116822	0.0443925	0.0350467	0.0046729	0.0257009	0.0607477	0.0397196	0.0514019	0.0303738	0.0700935	0.0584112	0.0233645	0.0116822	0.0303738	0.0420561	0.00233645	0.046729	0.0514019	0.0747664	0.046729	0.0864486	0.088785	0.0420561	0.0957944	0.0327103	0.0537383	0.0443925	0.021028	0.0257009	0.0700935	0.128505	0.0584112	0.0327103	0.046729	0.0630841	0.0280374
MYH9	ENST00000216181.11	full-splice_match	1	0	0	7451	5880	180	1391	0.583009	0.592278	0.674033	0.531991	0.0214395	0.0403267	0.10975	0.0148035	0.0438999	0.0535988	0.028586	0.0214395	0.0985197	0.114344	0.118428	0.0193977	0.00408372	0.042879	0.0413476	0.0127616	0.0740174	0.0352221	0.100051	0.0398162	0.0796325	0.0331802	0.0474732	0.0479837	0.0418581	0.0413476	0.0423686	0.0173558	0.0117407	0.0433895	0.104645	0.02195	0.0872894	0.0587034	0.137315	0.036243
ADSL	ENST00000216194.11	full-splice_match	1	0	0	1620	1494	31	95	0.501235	0.509042	0.71875	0.305263	0.0362173	0.0382294	0.056338	0.0201207	0.0603622	0.0422535	0.0241449	0.0321932	0.0684105	0.0603622	0.0663984	0.0362173	0.0261569	0.0442656	0.0603622	0.0503018	0.0382294	0.0422535	0.104628	0.0684105	0.0603622	0.0321932	0.0342052	0.0462777	0.028169	0.0261569	0.0221328	0.0241449	0.0241449	0.0442656	0.0704225	0.0603622	0.0583501	0.0442656	0.0583501	0.0663984
PVALB	ENST00000216200.9	full-splice_match	1	0	0	595	330	56	209	0.519328	0.504559	0.666667	0.502392	0.0917431	0.0183486	0.12844	0.0275229	0.0642202	0.0366972	0.0275229	0.0275229	0.100917	0.0366972	0.0642202	0.0275229	0	0.0275229	0.0917431	0.0275229	0.0733945	0.0275229	0.0275229	0.0366972	0.0550459	0.00917431	0.00917431	0.0458716	0.0458716	0.0183486	0.0366972	0	0.0275229	0.0366972	0.110092	0.0550459	0.0825688	0.100917	0.0733945	0.0825688
IL2RB	ENST00000216223.10	full-splice_match	1	0	0	4034	1653	125	2256	0.577095	0.614407	0.674603	0.544326	0.0109091	0.0309091	0.0527273	0.00727273	0.0363636	0.0636364	0.02	0.0436364	0.0563636	0.0618182	0.0763636	0.0381818	0.00363636	0.0290909	0.0327273	0.00545455	0.0454545	0.0545455	0.0945455	0.0309091	0.0927273	0.103636	0.0181818	0.136364	0.0163636	0.02	0.0290909	0.0163636	0.0127273	0.08	0.129091	0.0618182	0.0381818	0.0563636	0.0763636	0.0309091
HDAC10	ENST00000216271.10	full-splice_match	1	0	0	2567	2007	233	327	0.66342	0.64656	0.74359	0.70948	0.00598802	0.0194611	0.0164671	0.00748503	0.0314371	0.0568862	0.0299401	0.0284431	0.0434132	0.0673653	0.0748503	0.0359281	0.00449102	0.0254491	0.0494012	0.00299401	0.0209581	0.0598802	0.10479	0.0329341	0.0868263	0.0718563	0.0434132	0.113772	0.0179641	0.0434132	0.0479042	0.0194611	0.0179641	0.0538922	0.163174	0.0299401	0.0209581	0.0508982	0.0823353	0.0299401
PAPOLA	ENST00000216277.13	full-splice_match	1	0	0	4515	2235	211	2069	0.394241	0.409579	0.707547	0.345578	0.0887097	0.0806452	0.0793011	0.0672043	0.0887097	0.0416667	0.0147849	0.0483871	0.0806452	0.0524194	0.0416667	0.0551075	0.0403226	0.047043	0.0524194	0.0672043	0.0913978	0.0416667	0.0900538	0.0443548	0.0604839	0.016129	0.00806452	0.0430108	0.0134409	0.00672043	0.00806452	0.0094086	0.0456989	0.0376344	0.0497312	0.0456989	0.0887097	0.0282258	0.0376344	0.0524194
HSP90AA1	ENST00000216281.13	full-splice_match	1	0	0	3228	2196	59	973	0.416047	0.421868	0.6	0.391572	0.0916553	0.0697674	0.132695	0.0410397	0.0656635	0.0410397	0.0205198	0.0478796	0.127223	0.0396717	0.0601915	0.0424077	0.0355677	0.0560876	0.0615595	0.0547196	0.0656635	0.0259918	0.0601915	0.0519836	0.0410397	0.0246238	0.00820793	0.0328317	0.0205198	0.00820793	0.0109439	0.00957592	0.0314637	0.0328317	0.0670315	0.0451436	0.143639	0.0533516	0.0738714	0.0697674
NID2	ENST00000216286.10	full-splice_match	1	0	0	4870	4125	65	680	0.523409	0.554801	0.742424	0.311765	0.0276565	0.0414847	0.0393013	0.0334789	0.0502183	0.0764192	0.0312955	0.0509461	0.0545852	0.0524017	0.0524017	0.0334789	0.0203785	0.0407569	0.0582242	0.0218341	0.0458515	0.0684134	0.0873362	0.0407569	0.0902475	0.06623	0.0378457	0.0756914	0.0225619	0.0232897	0.0334789	0.0232897	0.0312955	0.0451237	0.104076	0.0509461	0.0545852	0.0524017	0.0545852	0.0451237
MARK3	ENST00000216288.11	full-splice_match	1	0	0	2911	2139	170	602	0.453796	0.452292	0.631579	0.408638	0.0828652	0.0575843	0.0842697	0.0772472	0.0617978	0.0337079	0.0294944	0.0505618	0.0856742	0.0547753	0.0351124	0.0632022	0.0407303	0.0491573	0.0603933	0.0491573	0.0786517	0.0477528	0.0786517	0.0407303	0.0632022	0.0224719	0.0168539	0.0435393	0.0224719	0.0182584	0.0308989	0.0140449	0.0393258	0.0533708	0.0491573	0.0337079	0.103933	0.0393258	0.0477528	0.0449438
SUPT16H	ENST00000216297.7	full-splice_match	1	0	0	4433	3141	92	1200	0.441913	0.436943	0.698925	0.435	0.0764818	0.0506692	0.128107	0.0678776	0.0525813	0.0334608	0.0133843	0.0516252	0.114723	0.0478011	0.0602294	0.0516252	0.0334608	0.0391969	0.0764818	0.0535373	0.0659656	0.0305927	0.0564054	0.0458891	0.0363289	0.0229446	0.0152964	0.042065	0.0200765	0.00956023	0.0152964	0.0114723	0.0363289	0.0286807	0.0573614	0.0506692	0.138623	0.043021	0.0803059	0.0506692
FKBP3	ENST00000216330.7	full-splice_match	1	0	0	1684	672	411	601	0.418052	0.415797	0.526699	0.34609	0.121076	0.0627803	0.147982	0.0538117	0.058296	0.044843	0.00896861	0.058296	0.0807175	0.058296	0.0672646	0.0627803	0.044843	0.0179372	0.058296	0.044843	0.0852018	0.0358744	0.058296	0.0179372	0.0717489	0.0179372	0.00896861	0.0179372	0.0044843	0.0044843	0.0269058	0.0224215	0.0313901	0.0134529	0.0627803	0.0403587	0.103139	0.0403587	0.0538117	0.058296
PRMT5	ENST00000216350.12	full-splice_match	1	0	0	2271	1728	166	377	0.521797	0.518819	0.670659	0.469496	0.0208696	0.0382609	0.0573913	0.04	0.0434783	0.0695652	0.0156522	0.0469565	0.0678261	0.0469565	0.0591304	0.0434783	0.0243478	0.0521739	0.0591304	0.0330435	0.0469565	0.0521739	0.0834783	0.0626087	0.0921739	0.0434783	0.0347826	0.066087	0.0104348	0.013913	0.0295652	0.0156522	0.04	0.0521739	0.0834783	0.0486957	0.0608696	0.0521739	0.0730435	0.04
COCH	ENST00000216361.9	full-splice_match	1	0	0	2582	1845	425	312	0.504648	0.483731	0.711268	0.346154	0.0488599	0.0390879	0.0667752	0.0488599	0.0618893	0.029316	0.00814332	0.034202	0.0651466	0.0651466	0.0553746	0.0439739	0.034202	0.0358306	0.0684039	0.0504886	0.0504886	0.0456026	0.0863192	0.0504886	0.0586319	0.0309446	0.02443	0.0504886	0.0179153	0.0211726	0.0211726	0.00651466	0.0325733	0.0407166	0.0781759	0.0488599	0.0716612	0.0228013	0.0488599	0.0521173
SOS2	ENST00000216373.10	full-splice_match	1	0	0	5508	3996	295	1217	0.404684	0.401252	0.834459	0.311422	0.0901578	0.0465815	0.0833959	0.0803907	0.0480841	0.0465815	0.0127724	0.0450789	0.0826446	0.0435763	0.040571	0.0608565	0.0458302	0.0510894	0.0555973	0.0826446	0.0593539	0.0375657	0.0728775	0.0533434	0.0608565	0.0172802	0.00751315	0.0555973	0.0165289	0.00751315	0.0127724	0.00976709	0.02855	0.0435763	0.0563486	0.0533434	0.103681	0.0338092	0.0398197	0.0510894
TMED8	ENST00000216468.8	full-splice_match	1	0	0	7761	975	41	6745	0.430099	0.557495	0.738095	0.409785	0.0185185	0.0339506	0.0709877	0.0123457	0.0555556	0.058642	0.00925926	0.0432099	0.0709877	0.0524691	0.095679	0.037037	0.0123457	0.0432099	0.0524691	0.0246914	0.037037	0.0401235	0.0987654	0.037037	0.0833333	0.0339506	0.0308642	0.0648148	0.0185185	0.0123457	0.037037	0.0216049	0.0401235	0.058642	0.104938	0.0308642	0.0679012	0.058642	0.0864198	0.058642
SAMD15	ENST00000216471.5	full-splice_match	1	0	0	2984	2022	40	922	0.451408	0.450272	0.634146	0.44577	0.0980684	0.0713224	0.104012	0.0564636	0.0520059	0.0579495	0.0193165	0.0505201	0.167905	0.0520059	0.0846954	0.0564636	0.0237741	0.0326895	0.0490342	0.0564636	0.0817236	0.038633	0.10104	0.0282318	0.102526	0.0193165	0.0118871	0.0341753	0.0118871	0.00594354	0.0163447	0.0104012	0.038633	0.0312036	0.0475483	0.0237741	0.124814	0.0475483	0.13373	0.0534918
RIN3	ENST00000216487.12	full-splice_match	1	0	0	3852	2955	152	745	0.634995	0.629316	0.784314	0.626846	0.0182927	0.0223577	0.0569106	0.00914634	0.0325203	0.070122	0.0284553	0.0355691	0.0569106	0.0924797	0.0691057	0.0213415	0.00203252	0.0304878	0.0396341	0.0101626	0.0426829	0.0650407	0.106707	0.0365854	0.106707	0.0934959	0.0497967	0.0985772	0.0294715	0.0528455	0.0538618	0.0121951	0.0172764	0.0711382	0.103659	0.0335366	0.0447154	0.054878	0.0680894	0.0315041
DHRS7	ENST00000216500.9	full-splice_match	1	0	0	2322	1017	456	849	0.46081	0.470472	0.628009	0.359246	0.0443787	0.0473373	0.0680473	0.0621302	0.0532544	0.0414201	0.0147929	0.0443787	0.0798817	0.056213	0.0384615	0.0384615	0.0473373	0.0266272	0.0710059	0.035503	0.0591716	0.0147929	0.0532544	0.0443787	0.0532544	0.0236686	0.00887574	0.0502959	0.0236686	0.0118343	0.0147929	0.00591716	0.0384615	0.0325444	0.10355	0.056213	0.0769231	0.0591716	0.0591716	0.0473373
SIX4	ENST00000216513.5	full-splice_match	1	0	0	6491	2343	277	3871	0.424126	0.542699	0.535971	0.344355	0.0410256	0.0423077	0.0666667	0.0435897	0.05	0.0589744	0.0141026	0.0435897	0.05	0.074359	0.0551282	0.0538462	0.0192308	0.0410256	0.0448718	0.0358974	0.075641	0.0525641	0.0948718	0.0358974	0.074359	0.0525641	0.0474359	0.0628205	0.0230769	0.0435897	0.0448718	0.0102564	0.0333333	0.0551282	0.0794872	0.0423077	0.0525641	0.0358974	0.0564103	0.0320513
CEP128	ENST00000216517.10	full-splice_match	1	0	0	1606	1305	278	23	0.461395	0.450153	0.53405	0.217391	0.0737327	0.0760369	0.105991	0.0529954	0.078341	0.0299539	0.016129	0.062212	0.119816	0.062212	0.0714286	0.0506912	0.0276498	0.0576037	0.0529954	0.0437788	0.0829493	0.0322581	0.0967742	0.0414747	0.0299539	0.00691244	0.0207373	0.0253456	0.0368664	0.0138249	0.0230415	0.00691244	0.0253456	0.0322581	0.0437788	0.0437788	0.12212	0.0437788	0.0829493	0.062212
PAPLN	ENST00000216658.9	full-splice_match	1	1	1	4182	2424	19	1739	0.618843	0.659926	0.6	0.561817	0.00495663	0.0185874	0.0272615	0.0086741	0.0309789	0.0582404	0.0285006	0.0309789	0.0260223	0.094176	0.0743494	0.0346964	0.00495663	0.0247831	0.0346964	0.00619579	0.0285006	0.0532838	0.118959	0.039653	0.0966543	0.094176	0.0520446	0.0892193	0.0272615	0.0322181	0.070632	0.0210657	0.0173482	0.063197	0.121437	0.0198265	0.0223048	0.0532838	0.0780669	0.0148699
EFS	ENST00000216733.8	full-splice_match	1	0	0	2653	1683	147	823	0.606106	0.653983	0.682432	0.494532	0.00714286	0.0178571	0.0232143	0.0125	0.0303571	0.0589286	0.0160714	0.0303571	0.0392857	0.0821429	0.0910714	0.0160714	0.00178571	0.0303571	0.0517857	0.0107143	0.0303571	0.0571429	0.121429	0.0232143	0.114286	0.135714	0.0517857	0.119643	0.0196429	0.025	0.0339286	0.00892857	0.0303571	0.0678571	0.135714	0.0196429	0.0196429	0.0375	0.075	0.0392857
PABPC1L	ENST00000217073.7	full-splice_match	1	0	0	2141	1857	84	200	0.58851	0.596444	0.776471	0.435	0.0161812	0.0339806	0.0501618	0.0161812	0.0485437	0.0631068	0.0307443	0.0291262	0.0436893	0.0776699	0.0744337	0.0291262	0.0113269	0.0323625	0.0679612	0.012945	0.0501618	0.0517799	0.0987055	0.0614887	0.108414	0.066343	0.0420712	0.0647249	0.0226537	0.0453074	0.0550162	0.02589	0.0242718	0.0598706	0.066343	0.038835	0.0485437	0.0550162	0.0679612	0.0291262
PABPC1L	ENST00000217074.9	full-splice_match	1	1	0	1808	576	0	1232	0.576881	0.584348	0	0.573864	0.0104712	0.052356	0.052356	0.0104712	0.0471204	0.0575916	0.0366492	0.0418848	0.026178	0.0575916	0.0575916	0.0314136	0.0104712	0.0471204	0.052356	0.0104712	0.0732984	0.0418848	0.0471204	0.0575916	0.0680628	0.0575916	0.052356	0.0628272	0.0366492	0.0732984	0.0628272	0.0209424	0.026178	0.0680628	0.0471204	0.0837696	0.0418848	0.0628272	0.0680628	0.0314136
PABPC1L	ENST00000217075.7	full-splice_match	1	0	0	602	489	0	113	0.55814	0.60041	1	0.371681	0.037037	0.0185185	0.037037	0.0185185	0.0617284	0.0555556	0.0185185	0.0185185	0.0493827	0.0802469	0.0740741	0.0308642	0.0123457	0.0432099	0.0679012	0.0185185	0.0493827	0.0679012	0.12963	0.0740741	0.123457	0.0864198	0.037037	0.0740741	0	0.037037	0.0432099	0.0185185	0.0185185	0.0802469	0.0987654	0.0123457	0.0185185	0.037037	0.0493827	0.037037
CTSZ	ENST00000217131.6	full-splice_match	1	0	0	1502	909	126	467	0.581891	0.599119	0.787402	0.492505	0.0165563	0.0463576	0.0364238	0.0397351	0.0463576	0.0794702	0.0298013	0.0463576	0.0463576	0.0397351	0.0596026	0.0198675	0.0264901	0.0529801	0.0662252	0.013245	0.0529801	0.0496689	0.0662252	0.0629139	0.089404	0.0463576	0.0430464	0.0562914	0.0198675	0.0463576	0.0695364	0.0264901	0.0430464	0.0397351	0.109272	0.00993377	0.0463576	0.0596026	0.0629139	0.0364238
SLCO4A1	ENST00000217159.6	full-splice_match	1	0	0	2716	2166	147	403	0.614138	0.624942	0.72973	0.513648	0.00970874	0.0249653	0.0249653	0.0152566	0.037448	0.0554785	0.036061	0.0291262	0.0291262	0.0818308	0.0332871	0.0235784	0.0110957	0.0332871	0.0332871	0.0138696	0.0263523	0.0624133	0.0957004	0.0540915	0.0846047	0.0651872	0.0513176	0.105409	0.0152566	0.0429958	0.0707351	0.0305132	0.0277393	0.0679612	0.124827	0.0513176	0.0346741	0.0332871	0.038835	0.0124827
TCFL5	ENST00000217162.5	full-splice_match	1	0	0	2453	1449	237	767	0.571137	0.569751	0.844538	0.488918	0.0477178	0.0414938	0.0580913	0.0497925	0.06639	0.0186722	0.0290456	0.0373444	0.0580913	0.06639	0.0622407	0.0394191	0.0145228	0.033195	0.0435685	0.0373444	0.060166	0.0435685	0.0684647	0.0435685	0.0435685	0.0373444	0.0622407	0.0352697	0.0373444	0.0684647	0.0809129	0.0228216	0.0311203	0.0394191	0.0726141	0.0373444	0.06639	0.0414938	0.0726141	0.0248963
EEF1A2	ENST00000217182.6	full-splice_match	1	0	0	1773	1389	97	287	0.645798	0.621758	0.693878	0.745645	0.0108225	0.030303	0.101732	0.00865801	0.0627706	0.0541126	0.04329	0.017316	0.0692641	0.0519481	0.0627706	0.038961	0	0.0670996	0.034632	0.012987	0.0692641	0.0606061	0.04329	0.0757576	0.0714286	0.0606061	0.0584416	0.047619	0.0324675	0.0541126	0.0995671	0.047619	0.017316	0.0367965	0.0735931	0.0151515	0.0692641	0.0606061	0.0735931	0.025974
SRMS	ENST00000217188.2	full-splice_match	1	0	0	4082	1464	286	2332	0.651151	0.660971	0.738676	0.63422	0	0.0246407	0.0492813	0.00410678	0.026694	0.0492813	0.0472279	0.0349076	0.0349076	0.073922	0.0780287	0.0205339	0	0.0308008	0.0287474	0.00410678	0.0390144	0.0574949	0.0841889	0.0328542	0.0780287	0.0800821	0.063655	0.0944559	0.0349076	0.0472279	0.0882957	0.0287474	0.026694	0.0698152	0.11499	0.0472279	0.0390144	0.0472279	0.0698152	0.0184805
MACROD2	ENST00000217246.8	full-splice_match	1	0	0	4994	1275	395	3324	0.426512	0.431711	0.69697	0.392298	0.0896226	0.0471698	0.136792	0.0731132	0.0518868	0.0330189	0.0141509	0.0283019	0.143868	0.0353774	0.0778302	0.0330189	0.0448113	0.0448113	0.0919811	0.0495283	0.0754717	0.0212264	0.0613208	0.0589623	0.0542453	0.0259434	0.0165094	0.0377358	0.0165094	0.00707547	0.0117925	0.0141509	0.0306604	0.0259434	0.0518868	0.0283019	0.15566	0.0400943	0.0660377	0.0660377
SLC52A3	ENST00000217254.11	full-splice_match	1	0	0	2654	1407	298	949	0.587792	0.624467	0.575251	0.537408	0.00213675	0.0192308	0.0192308	0.017094	0.0192308	0.0811966	0.017094	0.0299145	0.0235043	0.0534188	0.0320513	0.0128205	0.00641026	0.0363248	0.042735	0.0042735	0.0277778	0.0641026	0.0641026	0.0470085	0.0705128	0.0769231	0.0405983	0.166667	0.00854701	0.0320513	0.0470085	0.0384615	0.0277778	0.100427	0.141026	0.0769231	0.025641	0.0363248	0.034188	0.0128205
RSPO4	ENST00000217260.9	full-splice_match	1	0	0	2757	702	147	1908	0.605731	0.649073	0.831081	0.572327	0.0171674	0.0257511	0.0686695	0.0128755	0.0343348	0.0343348	0.0343348	0.0429185	0.0600858	0.0472103	0.11588	0.0343348	0	0.0300429	0.0214592	0	0.0429185	0.0643777	0.0944206	0.0343348	0.0858369	0.0643777	0.0686695	0.0686695	0.0128755	0.0515021	0.0729614	0.0128755	0	0.0300429	0.141631	0.0386266	0.0643777	0.0343348	0.0815451	0
FERMT1	ENST00000217289.9	full-splice_match	1	0	0	4637	2031	275	2331	0.466465	0.451724	0.717391	0.449592	0.0769231	0.056213	0.0724852	0.0606509	0.0547337	0.0502959	0.0133136	0.0428994	0.0784024	0.0576923	0.0488166	0.0399408	0.0399408	0.0473373	0.0636095	0.0517751	0.0621302	0.0384615	0.0843195	0.0547337	0.0695266	0.0369822	0.0192308	0.0473373	0.0236686	0.0133136	0.0192308	0.0118343	0.0266272	0.0384615	0.0650888	0.0576923	0.0857988	0.0428994	0.045858	0.0532544
PDYN	ENST00000217305.3	full-splice_match	1	0	0	2556	762	227	1567	0.49061	0.574244	0.596491	0.434588	0.027668	0.027668	0.0750988	0.0237154	0.0316206	0.0355731	0.0197628	0.027668	0.055336	0.0750988	0.0948617	0.027668	0.00790514	0.0197628	0.0671937	0.0118577	0.083004	0.0237154	0.055336	0.0237154	0.0671937	0.0592885	0.00790514	0.0750988	0.00790514	0.0316206	0.0355731	0.00395257	0.0237154	0.0869565	0.118577	0.0395257	0.0395257	0.0434783	0.110672	0.0355731
TM9SF4	ENST00000217315.9	full-splice_match	1	0	0	4032	1875	340	1817	0.53001	0.528282	0.636364	0.511833	0.0208333	0.036859	0.0528846	0.0160256	0.0480769	0.0625	0.0176282	0.0400641	0.0560897	0.0592949	0.0416667	0.025641	0.00801282	0.0657051	0.0512821	0.036859	0.0448718	0.0432692	0.0673077	0.0737179	0.0657051	0.0432692	0.0320513	0.0785256	0.0208333	0.0176282	0.0384615	0.0288462	0.0432692	0.0608974	0.0897436	0.0625	0.0528846	0.0384615	0.0544872	0.0416667
PXMP4	ENST00000217398.3	full-splice_match	1	0	0	979	432	103	444	0.578141	0.587007	0.692308	0.542793	0.013986	0.048951	0.048951	0.020979	0.0629371	0.0559441	0.048951	0.020979	0.027972	0.0559441	0.048951	0.013986	0.027972	0.034965	0.027972	0.00699301	0.0629371	0.0699301	0.0699301	0.048951	0.0559441	0.034965	0.0559441	0.111888	0	0.0699301	0.048951	0.041958	0.041958	0.0559441	0.111888	0.034965	0.034965	0.013986	0.020979	0.00699301
LBP	ENST00000217407.3	full-splice_match	1	0	0	1825	1443	35	347	0.536438	0.540915	0.611111	0.510086	0.0229167	0.04375	0.0479167	0.0270833	0.05	0.0479167	0.0145833	0.0479167	0.0375	0.0604167	0.0604167	0.0541667	0.0229167	0.0520833	0.04375	0.025	0.0541667	0.0416667	0.1	0.04375	0.09375	0.0395833	0.0375	0.0895833	0.0208333	0.0229167	0.0270833	0.01875	0.0270833	0.0708333	0.1	0.0666667	0.0479167	0.04375	0.0520833	0.0458333
POLI	ENST00000217800.9	full-splice_match	1	0	0	2289	2034	0	255	0.372652	0.383669	1	0.282353	0.103397	0.0546529	0.0960118	0.0723781	0.0605613	0.0398818	0.00443131	0.0546529	0.0945347	0.0384047	0.0369276	0.0679468	0.0516987	0.0443131	0.0605613	0.0768095	0.0723781	0.0339734	0.0664697	0.0487445	0.0516987	0.0177253	0.00590842	0.042836	0.00295421	0.00295421	0.00886263	0.00886263	0.0457903	0.0324963	0.0487445	0.0664697	0.0974889	0.028065	0.0384047	0.05613
MXRA5	ENST00000217939.7	full-splice_match	1	0	0	9804	8484	166	1154	0.502958	0.514794	0.724551	0.383882	0.0470463	0.0573046	0.0728688	0.034312	0.0696852	0.0654404	0.0261762	0.0449239	0.072515	0.0562434	0.058012	0.0452777	0.0226388	0.0459851	0.0505837	0.0311284	0.077821	0.0629643	0.0845419	0.0502299	0.0983375	0.0534135	0.0279448	0.0576583	0.0134418	0.019809	0.0311284	0.0191015	0.0297135	0.0537672	0.0622568	0.0495225	0.0672091	0.0502299	0.0619031	0.0424478
VSIG1	ENST00000217957.10	full-splice_match	1	0	0	3033	1161	66	1806	0.425981	0.483621	0.507463	0.385936	0.0544041	0.0569948	0.0932642	0.0414508	0.0414508	0.0492228	0.015544	0.0544041	0.0854922	0.0725389	0.0518135	0.0440415	0.0181347	0.0751295	0.0284974	0.0414508	0.0751295	0.0259067	0.0803109	0.0673575	0.108808	0.0362694	0.00777202	0.0569948	0.0207254	0.0207254	0.015544	0.0129534	0.0414508	0.0284974	0.0647668	0.0595855	0.0803109	0.0440415	0.0621762	0.0336788
NXT2	ENST00000218004.5	full-splice_match	1	0	0	2692	591	102	1999	0.352526	0.452542	0.427184	0.31916	0.0459184	0.0714286	0.0765306	0.0510204	0.0765306	0.0408163	0.0204082	0.0765306	0.0867347	0.0306122	0.0612245	0.0714286	0.0408163	0.0102041	0.0663265	0.0510204	0.0918367	0.0612245	0.0816327	0.0204082	0.0918367	0.0255102	0.0153061	0.0255102	0.00510204	0.00510204	0.0153061	0.0153061	0.0408163	0.0306122	0.0816327	0.0357143	0.0714286	0.0561224	0.0612245	0.0561224
GUCY2F	ENST00000218006.3	full-splice_match	1	0	0	3728	3324	306	98	0.470762	0.473969	0.442997	0.44898	0.0523939	0.0361337	0.068654	0.0532972	0.0496838	0.0460705	0.00813008	0.0415537	0.0731707	0.0523939	0.0514905	0.0424571	0.0252936	0.0352304	0.0785908	0.0560072	0.0542005	0.031617	0.0749774	0.0569106	0.0623306	0.0307136	0.0108401	0.0641373	0.0162602	0.00903342	0.0198735	0.0108401	0.031617	0.0442638	0.0722674	0.0722674	0.0767841	0.0460705	0.0578139	0.0542005
STAG2	ENST00000218089.13	full-splice_match	1	0	0	5218	3804	510	904	0.38463	0.39574	0.463796	0.293142	0.0734017	0.047356	0.0876085	0.0726125	0.0647198	0.0284136	0.00947119	0.0528808	0.0962904	0.0584057	0.0449882	0.0560379	0.0568272	0.0339384	0.0970797	0.0678769	0.0678769	0.0363062	0.074191	0.0497238	0.0331492	0.00789266	0.00947119	0.026835	0.0142068	0.0023678	0.0110497	0.00789266	0.0299921	0.0276243	0.0449882	0.0599842	0.0955012	0.035517	0.0584057	0.0820837
ABCD1	ENST00000218104.6	full-splice_match	1	0	0	3669	2235	411	1023	0.657672	0.648612	0.684466	0.666667	0.00672043	0.0201613	0.047043	0.00537634	0.0336022	0.0443548	0.0336022	0.0255376	0.0376344	0.0698925	0.077957	0.0174731	0.00268817	0.0376344	0.0416667	0.00806452	0.0349462	0.047043	0.077957	0.0483871	0.0685484	0.0725806	0.0551075	0.104839	0.0120968	0.0604839	0.0806452	0.0336022	0.0349462	0.0672043	0.111559	0.0255376	0.0376344	0.0362903	0.0739247	0.0228495
BCORL1	ENST00000218147.11	full-splice_match	1	0	0	6860	5133	197	1530	0.57551	0.587295	0.636364	0.528105	0.0280702	0.0350877	0.0678363	0.0169591	0.0426901	0.0631579	0.022807	0.0321637	0.0549708	0.0830409	0.0672515	0.0432749	0.00526316	0.0315789	0.0327485	0.0152047	0.0532164	0.0596491	0.11345	0.0304094	0.105848	0.0812865	0.0502924	0.0900585	0.0292398	0.0210526	0.0356725	0.0175439	0.0204678	0.0730994	0.0918129	0.0473684	0.0584795	0.0450292	0.0596491	0.0280702
KCND1	ENST00000218176.4	full-splice_match	1	0	0	4718	1941	1573	1204	0.58139	0.601031	0.587039	0.542359	0.00464396	0.0325077	0.0402477	0.0139319	0.0402477	0.0557276	0.0294118	0.0340557	0.0479876	0.0820433	0.0526316	0.0247678	0.00619195	0.0371517	0.0417957	0.0185759	0.0402477	0.0526316	0.0975232	0.0619195	0.0804954	0.0572755	0.0510836	0.0913313	0.0340557	0.0417957	0.0541796	0.0232198	0.0232198	0.0557276	0.100619	0.0696594	0.0448916	0.0448916	0.0634675	0.0185759
FMR1	ENST00000218200.12	full-splice_match	1	0	0	4333	1833	229	2271	0.389568	0.431769	0.843478	0.309555	0.0819672	0.0442623	0.106557	0.0672131	0.0590164	0.0344262	0.0196721	0.0327869	0.103279	0.0508197	0.0803279	0.0540984	0.042623	0.0344262	0.0754098	0.0622951	0.0655738	0.0393443	0.0737705	0.0377049	0.0557377	0.0131148	0.00163934	0.0327869	0.0147541	0.00983607	0.0180328	0.0180328	0.0360656	0.0213115	0.0491803	0.0344262	0.095082	0.0327869	0.0737705	0.0803279
PIN4	ENST00000218432.10	full-splice_match	1	0	0	1780	258	110	1412	0.386517	0.466926	0.513514	0.361898	0.129412	0.0117647	0.188235	0.0352941	0.0588235	0	0	0	0.0470588	0.0588235	0.0941176	0.105882	0.0235294	0.0117647	0.0941176	0.0470588	0.0941176	0.0235294	0.0705882	0.0470588	0.0470588	0.0235294	0.0235294	0.0117647	0	0.0235294	0.0117647	0	0.0117647	0.0352941	0.0470588	0.0117647	0.105882	0.0352941	0.0352941	0.0352941
ARHGEF7	ENST00000218789.9	full-splice_match	1	0	0	5233	2115	497	2621	0.497611	0.491958	0.614458	0.479969	0.0724432	0.0511364	0.0980114	0.0525568	0.0596591	0.0568182	0.0326705	0.0298295	0.0909091	0.0738636	0.0482955	0.046875	0.0369318	0.0355114	0.0610795	0.0326705	0.0795455	0.0482955	0.0752841	0.0426136	0.0667614	0.0525568	0.0284091	0.0653409	0.015625	0.0241477	0.0269886	0.0241477	0.0298295	0.046875	0.0738636	0.0397727	0.0951705	0.0482955	0.0653409	0.0440341
DHRS12	ENST00000218981.5	full-splice_match	1	0	0	1970	726	112	1132	0.553299	0.528276	0.716814	0.553004	0.0622407	0.0539419	0.0622407	0.0456432	0.0580913	0.0373444	0.0165975	0.0497925	0.0497925	0.0497925	0.06639	0.0165975	0.0207469	0.0373444	0.0580913	0.0373444	0.0622407	0.0539419	0.0705394	0.0622407	0.0746888	0.0497925	0.0497925	0.0497925	0.033195	0.033195	0.0373444	0.00414938	0.00829876	0.0497925	0.0954357	0.0456432	0.0788382	0.0456432	0.0497925	0.0373444
ZNF263	ENST00000219069.6	full-splice_match	1	0	0	3282	2049	328	905	0.552712	0.556152	0.702128	0.490608	0.0351906	0.0439883	0.0601173	0.0307918	0.0513196	0.058651	0.0190616	0.0351906	0.0938416	0.068915	0.0894428	0.0410557	0.0146628	0.0293255	0.042522	0.0175953	0.0395894	0.058651	0.0938416	0.0366569	0.0777126	0.0659824	0.0234604	0.0733138	0.0190616	0.016129	0.0322581	0.0102639	0.0146628	0.0571848	0.0806452	0.0513196	0.0821114	0.0439883	0.131965	0.0175953
PHAF1	ENST00000219139.8	full-splice_match	1	0	0	2917	1266	235	1416	0.51217	0.472727	0.741525	0.509181	0.04038	0.0665083	0.0546318	0.04038	0.064133	0.0451306	0.023753	0.0498812	0.0593824	0.0475059	0.0380048	0.0522565	0.0213777	0.0380048	0.0688836	0.0546318	0.0665083	0.0332542	0.0783848	0.0712589	0.0736342	0.0380048	0.00475059	0.0712589	0.023753	0.0190024	0.00950119	0.00712589	0.0356295	0.0665083	0.0783848	0.0593824	0.0593824	0.0475059	0.0427553	0.0451306
CBLN1	ENST00000219197.11	full-splice_match	1	0	0	2442	579	373	1490	0.545045	0.591696	0.764706	0.471812	0.0364583	0.0625	0.0364583	0.0208333	0.0364583	0.0625	0.046875	0.046875	0.03125	0.0625	0.046875	0.0364583	0.0104167	0.046875	0.03125	0.0208333	0.0572917	0.0416667	0.0625	0.0520833	0.078125	0.0416667	0.0572917	0.0520833	0.0416667	0.046875	0.0572917	0.0364583	0.03125	0.046875	0.0989583	0.0416667	0.0364583	0.0520833	0.0729167	0.0364583
ACD	ENST00000219251.13	full-splice_match	1	0	0	2052	1365	590	97	0.626218	0.630499	0.641286	0.474227	0.0132159	0.0110132	0.0264317	0.0132159	0.0264317	0.0704846	0.0330396	0.0286344	0.0396476	0.0837004	0.0814978	0.0286344	0.00440529	0.0242291	0.0418502	0.00660793	0.0220264	0.0748899	0.11674	0.0264317	0.114537	0.0991189	0.0418502	0.101322	0.0154185	0.0286344	0.0572687	0.0176211	0.0220264	0.0704846	0.134361	0.0418502	0.0264317	0.0528634	0.0814978	0.0242291
MMP15	ENST00000219271.4	full-splice_match	1	0	0	4062	2007	597	1458	0.655342	0.653041	0.762542	0.61454	0.010479	0.0254491	0.0374251	0.00748503	0.0404192	0.0613772	0.0523952	0.0299401	0.0344311	0.0748503	0.0523952	0.0239521	0.00299401	0.0269461	0.0464072	0.00598802	0.0419162	0.0553892	0.0823353	0.0374251	0.0973054	0.0733533	0.0673653	0.0733533	0.0404192	0.0583832	0.0853293	0.0299401	0.0329341	0.0344311	0.0928144	0.0449102	0.0269461	0.0703593	0.0643713	0.0254491
HAS3	ENST00000219322.7	full-splice_match	1	0	0	1163	843	60	260	0.606191	0.633017	0.803279	0.473077	0.00714286	0.0107143	0.0392857	0	0.025	0.0535714	0.0428571	0.0285714	0.0285714	0.0714286	0.0928571	0.0285714	0.00357143	0.0357143	0.0535714	0.0107143	0.0321429	0.05	0.0964286	0.0678571	0.0821429	0.0428571	0.0357143	0.1	0.0357143	0.0428571	0.075	0.0214286	0.0285714	0.0321429	0.0964286	0.0428571	0.0178571	0.0535714	0.0785714	0.0285714
SMPD3	ENST00000219334.10	full-splice_match	1	0	0	5271	1965	424	2882	0.608044	0.630346	0.701176	0.579112	0.00917431	0.030581	0.0519878	0.0152905	0.0428135	0.059633	0.0458716	0.030581	0.0336391	0.0779817	0.0779817	0.0183486	0.00611621	0.0321101	0.0229358	0.0137615	0.0519878	0.0519878	0.087156	0.0351682	0.0795107	0.0672783	0.0504587	0.0993884	0.0428135	0.0382263	0.0703364	0.0198777	0.0229358	0.0535168	0.12844	0.0336391	0.0351682	0.059633	0.0657492	0.0183486
PLA2G15	ENST00000219345.10	full-splice_match	1	0	0	2694	1236	54	1404	0.595768	0.598381	0.654545	0.591168	0.0170316	0.0364964	0.0462287	0.0145985	0.0583942	0.0632603	0.0218978	0.0486618	0.0437956	0.0632603	0.0389294	0.026764	0.00486618	0.0340633	0.0510949	0.00973236	0.0510949	0.0632603	0.0778589	0.0243309	0.0778589	0.0681265	0.0437956	0.0924574	0.0243309	0.0291971	0.0389294	0.0316302	0.0437956	0.0437956	0.141119	0.0389294	0.0389294	0.0510949	0.0437956	0.0364964
FA2H	ENST00000219368.8	full-splice_match	1	0	0	2405	1116	65	1224	0.598337	0.623318	0.742424	0.56781	0.0134771	0.0215633	0.0377358	0.00269542	0.0458221	0.06469	0.0404313	0.0485175	0.032345	0.06469	0.0458221	0.0296496	0	0.0350404	0.0296496	0.0242588	0.0242588	0.0781671	0.0889488	0.0566038	0.0808625	0.0673854	0.06469	0.105121	0.0350404	0.0619946	0.0512129	0.0242588	0.0350404	0.083558	0.0889488	0.0431267	0.032345	0.0485175	0.0431267	0.0161725
ZNF500	ENST00000219478.11	full-splice_match	1	0	0	5824	1440	244	4140	0.587054	0.658096	0.632653	0.559662	0.00835073	0.0167015	0.0480167	0.00626305	0.0417537	0.0542797	0.0271399	0.0167015	0.0542797	0.114823	0.104384	0.0208768	0.00417537	0.0167015	0.0271399	0.00417537	0.0292276	0.0584551	0.131524	0.0104384	0.0960334	0.0793319	0.0688935	0.0772443	0.0250522	0.045929	0.0668058	0.0187891	0.0104384	0.0480167	0.0960334	0.0521921	0.039666	0.0480167	0.108559	0.0313152
RHBDL1	ENST00000219551.2	full-splice_match	1	0	0	1560	1314	27	219	0.653846	0.662605	0.607143	0.607306	0.00228833	0.02746	0.0228833	0	0.0389016	0.0640732	0.0389016	0.020595	0.0228833	0.0823799	0.0526316	0.0160183	0	0.0251716	0.0411899	0.00228833	0.0297483	0.0572082	0.0869565	0.0411899	0.0640732	0.0846682	0.0640732	0.107551	0.0183066	0.0526316	0.0686499	0.0297483	0.0343249	0.0503432	0.135011	0.0366133	0.0160183	0.0389016	0.0594966	0.02746
CAPN15	ENST00000219611.7	full-splice_match	1	0	0	4888	3258	507	1123	0.692308	0.692355	0.777559	0.653606	0.00460829	0.0230415	0.0294931	0.00276498	0.035023	0.0497696	0.0442396	0.0248848	0.0304147	0.0829493	0.0801843	0.0221198	0.000921659	0.0184332	0.0193548	0.00184332	0.0285714	0.0718894	0.0976959	0.0267281	0.0875576	0.0820276	0.0774194	0.0940092	0.0387097	0.0635945	0.0801843	0.0368664	0.0110599	0.0599078	0.125346	0.0258065	0.0221198	0.043318	0.078341	0.0101382
USP31	ENST00000219689.12	full-splice_match	1	0	0	10881	4056	182	6643	0.459333	0.560296	0.84153	0.387174	0.0451517	0.0333087	0.0666173	0.0251665	0.0503331	0.0444115	0.019245	0.0355292	0.0643967	0.0821614	0.054034	0.0355292	0.0133235	0.0318283	0.0362694	0.0340489	0.0621762	0.0495929	0.0954848	0.0429312	0.0703183	0.054034	0.0510733	0.0740192	0.0199852	0.0488527	0.0444115	0.0214656	0.0148038	0.0666173	0.0792006	0.0599556	0.0466321	0.0495929	0.0658771	0.0318283
TOX3	ENST00000219746.14	full-splice_match	1	0	0	4959	1728	420	2811	0.440008	0.535032	0.831354	0.323017	0.0417391	0.0486957	0.0556522	0.0486957	0.0626087	0.0591304	0.00695652	0.026087	0.0643478	0.144348	0.0313043	0.04	0.0243478	0.0521739	0.0573913	0.0313043	0.0834783	0.0556522	0.184348	0.066087	0.114783	0.0643478	0.0104348	0.0834783	0.013913	0.0191304	0.0191304	0.013913	0.0173913	0.0852174	0.0591304	0.026087	0.0504348	0.0330435	0.0330435	0.0313043
KNOP1	ENST00000219837.12	full-splice_match	1	0	0	6422	1374	72	4976	0.489723	0.522214	0.643836	0.478497	0.0809628	0.0437637	0.146608	0.0153173	0.04814	0.0525164	0.0218818	0.02407	0.126915	0.0656455	0.102845	0.0547046	0.0131291	0.0196937	0.0437637	0.00875274	0.0525164	0.0393873	0.105033	0.0306346	0.0875274	0.0547046	0.0175055	0.0634573	0.0196937	0.0175055	0.0328228	0.00218818	0.0196937	0.0525164	0.0393873	0.0415755	0.137856	0.0503282	0.083151	0.0393873
MGA	ENST00000219905.13	full-splice_match	1	0	0	12046	9195	188	2663	0.431263	0.440505	0.597884	0.387533	0.0734334	0.051893	0.0877937	0.0590731	0.0564621	0.0424282	0.00913838	0.0535248	0.0881201	0.0531984	0.0639687	0.0453655	0.0345953	0.0489556	0.0571149	0.051893	0.0593995	0.0375326	0.0894256	0.0421018	0.0597258	0.0241514	0.00620104	0.0600522	0.0120757	0.00359008	0.00913838	0.00848564	0.0368799	0.0509138	0.0685379	0.0613577	0.0998695	0.0362272	0.0528721	0.0584204
RASL12	ENST00000220062.9	full-splice_match	1	0	0	2519	798	156	1565	0.579595	0.627353	0.821656	0.53099	0.00377358	0.0301887	0.0566038	0.00377358	0.0415094	0.0830189	0.0188679	0.0301887	0.0528302	0.090566	0.0830189	0.0264151	0.00754717	0.0264151	0.0264151	0	0.0528302	0.0679245	0.0981132	0.0377358	0.0754717	0.0716981	0.0415094	0.101887	0.0339623	0.0490566	0.0339623	0.0150943	0.0150943	0.0415094	0.135849	0.045283	0.0377358	0.0566038	0.0867925	0.0113208
PAG1	ENST00000220597.4	full-splice_match	1	0	0	10744	1296	711	8737	0.409717	0.526641	0.644663	0.37324	0.0603248	0.0348028	0.0858469	0.0348028	0.0672854	0.0580046	0.0208817	0.0394432	0.099768	0.062645	0.0742459	0.0580046	0.0208817	0.0348028	0.0556845	0.0232019	0.0464037	0.0533643	0.116009	0.0417633	0.0788863	0.0417633	0.0116009	0.0672854	0.0278422	0.0116009	0.0301624	0.0116009	0.0232019	0.062645	0.0765661	0.0324826	0.0881671	0.062645	0.0812065	0.0394432
CPQ	ENST00000220763.10	full-splice_match	1	0	0	1932	1416	195	321	0.480331	0.483392	0.663265	0.35514	0.0467091	0.0339703	0.0870488	0.0424628	0.0382166	0.0382166	0.0106157	0.0552017	0.0934183	0.0658174	0.0509554	0.0318471	0.0339703	0.0552017	0.0700637	0.0424628	0.0658174	0.0339703	0.089172	0.0530786	0.0721868	0.0191083	0.00424628	0.0573248	0.00849257	0.00636943	0.014862	0.00636943	0.0276008	0.0403397	0.0955414	0.0509554	0.0785563	0.0382166	0.0552017	0.059448
PHF20L1	ENST00000220847.8	full-splice_match	1	0	0	3297	2973	321	3	0.454049	0.423284	0.73913	0.333333	0.0919192	0.0464646	0.109091	0.0646465	0.0616162	0.0373737	0.010101	0.0393939	0.113131	0.0656566	0.0474747	0.0515152	0.0393939	0.0484848	0.0646465	0.0474747	0.0656566	0.0383838	0.0818182	0.0383838	0.0515152	0.020202	0.00707071	0.0383838	0.0171717	0.00808081	0.00808081	0.0141414	0.0333333	0.0454545	0.0505051	0.0525253	0.107071	0.0333333	0.059596	0.0666667
TRPS1	ENST00000220888.9	full-splice_match	1	0	0	5480	3843	160	1477	0.445073	0.474492	0.546584	0.357481	0.0773438	0.0492187	0.0890625	0.0492187	0.0578125	0.0414062	0.015625	0.0570313	0.084375	0.0585938	0.0601562	0.0585938	0.0304687	0.040625	0.0546875	0.0421875	0.0820312	0.0492187	0.0929687	0.046875	0.0734375	0.0359375	0.01875	0.0515625	0.0164063	0.0109375	0.0179687	0.0101563	0.028125	0.04375	0.0703125	0.05	0.06875	0.046875	0.0632812	0.0414062
UBR5	ENST00000220959.8	full-splice_match	1	0	0	9418	8394	455	569	0.452856	0.443822	0.754386	0.344464	0.0589918	0.0432606	0.0700751	0.0661423	0.0518413	0.0325349	0.0164462	0.0425456	0.0811584	0.0654272	0.0521988	0.0518413	0.0286021	0.0496961	0.0747229	0.0604219	0.0611369	0.0314623	0.0886664	0.0514837	0.0589918	0.0185913	0.0114408	0.0418305	0.0189489	0.00929567	0.0132285	0.0128709	0.0314623	0.0357526	0.0661423	0.0536289	0.0883089	0.0332499	0.0532714	0.0589918
PNPLA6	ENST00000221249.10	full-splice_match	1	0	0	4617	3981	431	205	0.636994	0.636935	0.627315	0.658537	0.0128205	0.0218703	0.0392157	0.0113122	0.0324284	0.0573152	0.0429864	0.0354449	0.040724	0.0791855	0.0595777	0.0248869	0.00527903	0.0377074	0.0384615	0.0135747	0.0331825	0.0558069	0.0882353	0.0422323	0.0791855	0.061086	0.0633484	0.0739065	0.0346908	0.0595777	0.0761689	0.0309201	0.0248869	0.0573152	0.106335	0.0361991	0.0324284	0.0603318	0.0693816	0.0309201
PLAUR	ENST00000221264.8	full-splice_match	1	0	0	1610	870	427	313	0.557143	0.581128	0.574766	0.466454	0.017301	0.0415225	0.0622837	0.0242215	0.0311419	0.100346	0.0138408	0.0415225	0.0692042	0.0622837	0.0449827	0.0311419	0.00346021	0.0311419	0.0553633	0.017301	0.0346021	0.0622837	0.0865052	0.0415225	0.0865052	0.0519031	0.0588235	0.0934256	0.0242215	0.0380623	0.0207612	0.0138408	0.017301	0.0657439	0.145329	0.0276817	0.0761246	0.0588235	0.0553633	0.0276817
ZNF432	ENST00000221315.10	full-splice_match	1	0	0	4637	1956	336	2345	0.402847	0.403069	0.495549	0.389339	0.0998464	0.0721966	0.0844854	0.0829493	0.0660522	0.0353303	0.0107527	0.0537634	0.0706605	0.0506912	0.0491551	0.0537634	0.0583717	0.0675883	0.0998464	0.0322581	0.0552995	0.0276498	0.0706605	0.093702	0.0322581	0.0199693	0.00768049	0.030722	0.0230415	0.0015361	0.00460829	0.0107527	0.0291859	0.0368664	0.0399386	0.0506912	0.15361	0.00460829	0.0599078	0.0322581
ZNF780B	ENST00000221355.10	full-splice_match	1	0	0	3538	2055	702	781	0.399661	0.392892	0.462304	0.361076	0.0935673	0.0716374	0.0804094	0.0994152	0.0497076	0.0540936	0	0.0497076	0.0730994	0.0350877	0.0467836	0.0380117	0.0482456	0.0540936	0.0833333	0.0643275	0.0540936	0.0219298	0.0497076	0.0921053	0.0321637	0.0248538	0.00438596	0.0643275	0.0190058	0.00292398	0.00438596	0.0146199	0.00877193	0.0277778	0.0321637	0.105263	0.133041	0.0204678	0.0438596	0.0116959
TULP2	ENST00000221399.8	full-splice_match	1	0	0	1763	1560	156	47	0.548497	0.555484	0.528662	0.382979	0.0327553	0.044316	0.061657	0.044316	0.0655106	0.0578035	0.0289017	0.026975	0.061657	0.061657	0.0635838	0.0366089	0.0134875	0.0385356	0.0481696	0.0192678	0.0655106	0.0481696	0.0867052	0.0346821	0.0732177	0.0520231	0.0366089	0.0770713	0.0308285	0.026975	0.0404624	0.0289017	0.0250482	0.0674374	0.0712909	0.0500963	0.0751445	0.0655106	0.0693642	0.0250482
HNRNPL	ENST00000221419.10	full-splice_match	1	0	0	2142	1767	20	355	0.542951	0.579841	0.761905	0.346479	0.0238095	0.0408163	0.0561224	0.0357143	0.0323129	0.0612245	0.0391156	0.0408163	0.0544218	0.0663265	0.042517	0.0391156	0.0136054	0.0357143	0.0612245	0.0221088	0.0612245	0.0510204	0.079932	0.0340136	0.079932	0.0646259	0.037415	0.0459184	0.0255102	0.0340136	0.0884354	0.00680272	0.0323129	0.047619	0.0663265	0.0408163	0.0629252	0.0408163	0.0680272	0.042517
RELB	ENST00000221452.13	full-splice_match	1	0	0	2258	1737	116	405	0.649247	0.656682	0.82906	0.565432	0.0138408	0.0259516	0.0380623	0.00865052	0.0397924	0.0570934	0.0467128	0.0259516	0.0432526	0.0743945	0.0536332	0.017301	0.00346021	0.032872	0.0276817	0.0224913	0.0294118	0.0570934	0.0726644	0.0432526	0.067474	0.0692042	0.0986159	0.0899654	0.0467128	0.0588235	0.0865052	0.0346021	0.0190311	0.0467128	0.102076	0.0346021	0.0397924	0.0657439	0.067474	0.0276817
PPP1R37	ENST00000221462.9	full-splice_match	1	0	0	2946	2073	147	726	0.661575	0.663127	0.763514	0.636364	0.0057971	0.0434783	0.057971	0.00434783	0.0449275	0.0681159	0.0391304	0.0362319	0.073913	0.0797101	0.0724638	0.015942	0.00144928	0.026087	0.0231884	0.00724638	0.0507246	0.0666667	0.0811594	0.0304348	0.0710145	0.0956522	0.0681159	0.102899	0.0405797	0.0652174	0.073913	0.0231884	0.00869565	0.0710145	0.12029	0.0173913	0.0536232	0.0666667	0.0942029	0.0202899
FCGRT	ENST00000221466.10	full-splice_match	1	0	0	1511	1095	104	312	0.616148	0.634369	0.657143	0.538462	0.021978	0.0247253	0.0467033	0.0164835	0.0274725	0.0631868	0.0164835	0.0274725	0.021978	0.0851648	0.0686813	0.0274725	0.00274725	0.021978	0.021978	0.0164835	0.0357143	0.0549451	0.0769231	0.010989	0.0576923	0.0714286	0.0494505	0.131868	0.0192308	0.0494505	0.0631868	0.0192308	0.021978	0.0714286	0.134615	0.0521978	0.0467033	0.0302198	0.0741758	0.0274725
SLC17A7	ENST00000221485.8	full-splice_match	1	0	0	2949	1680	148	1121	0.577145	0.610482	0.838926	0.492417	0.0107335	0.0250447	0.0304114	0.00894454	0.0304114	0.0429338	0.039356	0.0339893	0.0322004	0.0679785	0.0429338	0.0322004	0.00715564	0.0572451	0.0465116	0.0143113	0.0268336	0.0554562	0.0644007	0.0733453	0.0751342	0.0554562	0.0429338	0.0679785	0.0232558	0.0626118	0.0661896	0.0375671	0.0411449	0.0518784	0.0930233	0.0465116	0.0304114	0.0357782	0.0697674	0.0268336
C19orf53	ENST00000221576.4	full-splice_match	1	0	0	504	240	0	264	0.579365	0.589958	0	0.57197	0.0759494	0.0379747	0.21519	0.0253165	0.0379747	0.0506329	0.0253165	0.0126582	0.139241	0.126582	0.0632911	0.0379747	0	0.0379747	0.0253165	0	0.0886076	0.0506329	0.126582	0.0126582	0.0886076	0.0506329	0.0379747	0.0759494	0.0253165	0.0632911	0.0632911	0.0126582	0.0126582	0.0379747	0.0759494	0.0126582	0.177215	0.0379747	0.0126582	0.0253165
C19orf44	ENST00000221671.8	full-splice_match	1	0	0	3346	1971	73	1302	0.564256	0.531472	0.635135	0.609831	0.0609756	0.0533537	0.0731707	0.0320122	0.0640244	0.0503049	0.027439	0.0472561	0.0884146	0.0853659	0.0625	0.0411585	0.0106707	0.0411585	0.0442073	0.0213415	0.0503049	0.0594512	0.120427	0.0426829	0.0838415	0.0487805	0.035061	0.0625	0.0289634	0.035061	0.0213415	0.0182927	0.0198171	0.0594512	0.0838415	0.0487805	0.0990854	0.0609756	0.0655488	0.0320122
SLC1A6	ENST00000221742.7	full-splice_match	1	0	0	1719	1692	8	19	0.599186	0.599054	0.444444	0.684211	0.0142096	0.0373002	0.026643	0.0106572	0.0390764	0.0603908	0.0390764	0.0248668	0.0373002	0.0657194	0.0479574	0.0159858	0.0035524	0.0550622	0.0603908	0.026643	0.0426288	0.0586146	0.0746004	0.0923623	0.0639432	0.044405	0.0408526	0.10302	0.0159858	0.0373002	0.0568384	0.026643	0.017762	0.0550622	0.113677	0.0550622	0.0284192	0.0390764	0.062167	0.026643
CCDC9	ENST00000221922.11	full-splice_match	1	0	0	2027	1593	156	278	0.651209	0.648241	0.687898	0.647482	0.0150943	0.0207547	0.0735849	0.0150943	0.0245283	0.0641509	0.0188679	0.0226415	0.0849057	0.0886792	0.116981	0.0433962	0.00188679	0.0245283	0.045283	0.00943396	0.0301887	0.0471698	0.0924528	0.0226415	0.0849057	0.0830189	0.0792453	0.0679245	0.0433962	0.0415094	0.0698113	0.00943396	0.00943396	0.0396226	0.0735849	0.0264151	0.0735849	0.0509434	0.164151	0.0396226
CD79A	ENST00000221972.8	full-splice_match	1	0	0	1099	678	26	395	0.601456	0.608567	0.481481	0.597468	0.00888889	0.0533333	0.04	0.0266667	0.04	0.0577778	0.0488889	0.0133333	0.04	0.0577778	0.0666667	0.0177778	0.0222222	0.04	0.08	0.00444444	0.0577778	0.0444444	0.0755556	0.0622222	0.0977778	0.0533333	0.0444444	0.12	0.0311111	0.0444444	0.0311111	0.0222222	0.0177778	0.0533333	0.115556	0.0266667	0.0622222	0.0311111	0.0577778	0.0444444
RPS19	ENST00000221975.6	full-splice_match	1	0	0	500	213	245	42	0.574	0.589623	0.597561	0.357143	0.0714286	0.0428571	0.114286	0.0285714	0.0714286	0.0428571	0.0285714	0.0285714	0.1	0.0714286	0.0714286	0.0142857	0	0.0428571	0.0571429	0	0.114286	0.0285714	0.1	0.0285714	0.1	0.0428571	0.0714286	0.0428571	0.0142857	0.0428571	0.0571429	0.0285714	0.0142857	0.0428571	0.0714286	0.0142857	0.0714286	0.1	0.0714286	0.0428571
ICAM5	ENST00000221980.5	full-splice_match	1	0	0	3029	2772	92	165	0.67547	0.68423	0.763441	0.478788	0.00866739	0.0346696	0.0216685	0.0130011	0.0260022	0.0541712	0.0444204	0.0325027	0.0379198	0.0747562	0.0585049	0.0227519	0.00433369	0.0184182	0.0227519	0.00866739	0.0260022	0.0541712	0.0823402	0.0184182	0.0736728	0.063922	0.0758397	0.0585049	0.0400867	0.102925	0.0985915	0.0455038	0.0162514	0.0574215	0.110509	0.0270856	0.0390033	0.0444204	0.0812568	0.0184182
CRX	ENST00000221996.12	full-splice_match	1	0	0	4366	897	109	3360	0.530692	0.631696	0.645455	0.5	0.0100671	0.0201342	0.0436242	0.0167785	0.0234899	0.0738255	0.0201342	0.0167785	0.0503356	0.0805369	0.0738255	0.033557	0.00671141	0.0302013	0.0402685	0.0167785	0.0436242	0.0469799	0.127517	0.0167785	0.104027	0.130872	0.0503356	0.120805	0.00671141	0.0302013	0.0469799	0.0234899	0.0604027	0.0738255	0.0805369	0.033557	0.0302013	0.0402685	0.0536913	0.0302013
CNFN	ENST00000222032.10	full-splice_match	1	0	0	533	336	60	137	0.619137	0.650746	0.590164	0.554745	0	0.018018	0.00900901	0	0.027027	0.0900901	0.036036	0.0630631	0.036036	0.036036	0.027027	0.036036	0	0.036036	0.027027	0	0.00900901	0.0900901	0.0900901	0.045045	0.0990991	0.0720721	0.0630631	0.117117	0.0540541	0.0630631	0.0720721	0.00900901	0.036036	0.0810811	0.171171	0.036036	0.018018	0.0720721	0.036036	0.018018
EPOR	ENST00000222139.11	full-splice_match	1	0	0	2411	1524	107	780	0.581501	0.645437	0.75	0.433333	0.00591716	0.0177515	0.0315582	0.00591716	0.0335306	0.0631164	0.0276134	0.0197239	0.0335306	0.0887574	0.0433925	0.0315582	0.00591716	0.035503	0.035503	0	0.0216963	0.0473373	0.0690335	0.0315582	0.0690335	0.0887574	0.061144	0.104536	0.035503	0.0631164	0.0512821	0.0315582	0.0315582	0.0788955	0.12426	0.0453649	0.0276134	0.0512821	0.0808679	0.0216963
RASIP1	ENST00000222145.9	full-splice_match	1	0	0	3199	2889	94	216	0.677712	0.687673	0.694737	0.537037	0.00935551	0.022869	0.0301455	0.00935551	0.0176715	0.049896	0.029106	0.0322245	0.027027	0.0904366	0.0592516	0.0155925	0.0010395	0.022869	0.022869	0.00935551	0.0280665	0.045738	0.0758836	0.0239085	0.0613306	0.0675676	0.0883576	0.0831601	0.0363825	0.0956341	0.0935551	0.0322245	0.0197505	0.0613306	0.117464	0.045738	0.031185	0.0467775	0.0758836	0.0155925
WDR83OS	ENST00000222190.9	full-splice_match	1	0	0	599	312	0	287	0.552588	0.565916	0	0.54007	0.0194175	0.0485437	0.038835	0.038835	0.0485437	0.038835	0.0485437	0.038835	0.00970874	0.0776699	0.0291262	0.0291262	0.00970874	0.0485437	0.116505	0	0.0485437	0.0291262	0.038835	0.0873786	0.0582524	0.0582524	0.0679612	0.0582524	0.0582524	0.038835	0.0679612	0.00970874	0.038835	0.0582524	0.0776699	0.0679612	0.0485437	0.0679612	0.0582524	0.0291262
SLC5A5	ENST00000222248.4	full-splice_match	1	0	0	3604	1929	375	1300	0.593507	0.626556	0.704787	0.512308	0.00623053	0.0264798	0.0280374	0.00934579	0.029595	0.0669782	0.0280374	0.0327103	0.0249221	0.0545171	0.0436137	0.0218069	0.00155763	0.0451713	0.0420561	0.00934579	0.0264798	0.0576324	0.0747664	0.0514019	0.0638629	0.0576324	0.046729	0.107477	0.0140187	0.0514019	0.0669782	0.0327103	0.0280374	0.0747664	0.138629	0.0482866	0.0311526	0.0482866	0.0373832	0.0218069
KCNN1	ENST00000222249.13	full-splice_match	1	0	0	3625	1629	319	1677	0.616552	0.641278	0.653125	0.585569	0.0166052	0.0258303	0.0498155	0.00738007	0.0387454	0.0719557	0.0516605	0.0239852	0.0369004	0.0848708	0.0442804	0.0129151	0.00369004	0.0405904	0.0461255	0.00922509	0.0424354	0.0645756	0.0682657	0.0645756	0.0848708	0.0719557	0.0701107	0.0867159	0.0332103	0.0608856	0.0774908	0.0369004	0.0258303	0.0793358	0.0922509	0.0239852	0.0332103	0.0608856	0.0535055	0.0239852
ARRDC2	ENST00000222250.5	full-splice_match	1	0	0	2501	1221	141	1139	0.607357	0.663115	0.647887	0.542581	0.0147783	0.0197044	0.0369458	0	0.0394089	0.044335	0.046798	0.0369458	0.0270936	0.0763547	0.0640394	0.0246305	0.00492611	0.0344828	0.0123153	0.00492611	0.0344828	0.0689655	0.0689655	0.0295567	0.0689655	0.0689655	0.0862069	0.0837438	0.044335	0.0812808	0.0738916	0.044335	0.0221675	0.0418719	0.108374	0.0418719	0.0197044	0.0492611	0.0738916	0.0197044
PIK3R2	ENST00000222254.13	full-splice_match	1	0	0	3980	2184	555	1241	0.640704	0.658268	0.68705	0.589041	0.0165062	0.0206327	0.0481431	0.0165062	0.0343879	0.0605227	0.0440165	0.0330124	0.0481431	0.0811554	0.0660248	0.0316369	0.00412655	0.0247593	0.0330124	0.00962861	0.045392	0.0674003	0.0784044	0.0151307	0.0618982	0.0839065	0.104539	0.0729023	0.045392	0.0949106	0.0632737	0.0288858	0.0192572	0.0577717	0.100413	0.0357634	0.0330124	0.0508941	0.0949106	0.0316369
SIPA1L3	ENST00000222345.11	full-splice_match	1	0	0	8004	5343	529	2132	0.619315	0.639461	0.64717	0.561914	0.0168539	0.0314607	0.0567416	0.0106742	0.0488764	0.0735955	0.0438202	0.0308989	0.05	0.0949438	0.0713483	0.0269663	0.00730337	0.0314607	0.0308989	0.00898876	0.0533708	0.0741573	0.102247	0.0398876	0.110674	0.0870787	0.0674157	0.0792135	0.0449438	0.05	0.0707865	0.0157303	0.0185393	0.0623596	0.0747191	0.0337079	0.0410112	0.0634831	0.0797753	0.0224719
PON1	ENST00000222381.8	full-splice_match	1	0	0	2393	1065	57	1271	0.411199	0.425752	0.62069	0.389457	0.0536723	0.0564972	0.0706215	0.0706215	0.059322	0.0480226	0.00282486	0.0621469	0.0706215	0.0282486	0.0254237	0.059322	0.0338983	0.0536723	0.079096	0.0621469	0.0451977	0.0451977	0.0564972	0.0536723	0.0451977	0.0254237	0.00847458	0.059322	0.019774	0.00564972	0	0.0112994	0.039548	0.0451977	0.0762712	0.0677966	0.0903955	0.039548	0.0367232	0.0649718
ABCF2-H2BE1	ENST00000222388.6	full-splice_match	1	0	0	2185	1902	46	237	0	0	0	0	0	0	0	0	0	0	0	0	0	0	0	0	0	0	0	0	0	0	0	0	0	0	0	0	0	0	0	0	0	0	0	0	0	0	0	0
LAMB1	ENST00000222399.11	full-splice_match	1	0	0	5650	5358	137	155	0.493982	0.494867	0.710145	0.270968	0.0532213	0.0532213	0.0745098	0.0403361	0.0554622	0.0436975	0.0207283	0.0554622	0.07507	0.0644258	0.0470588	0.0492997	0.0257703	0.0330532	0.0582633	0.0431373	0.0616246	0.0380952	0.087395	0.0408964	0.0638655	0.0296919	0.0252101	0.0543417	0.0296919	0.0145658	0.0201681	0.0168067	0.0229692	0.032493	0.0918768	0.0481793	0.0834734	0.0521008	0.0565826	0.0560224
ITGB8	ENST00000222573.5	full-splice_match	1	0	0	8974	2307	907	5760	0.387341	0.42758	0.680617	0.325	0.0820312	0.0442708	0.0703125	0.0807292	0.0520833	0.0351562	0.015625	0.03125	0.0625	0.0416667	0.0572917	0.0533854	0.0533854	0.0520833	0.0716146	0.0598958	0.0703125	0.0325521	0.0859375	0.0690104	0.0507812	0.0221354	0.015625	0.0364583	0.0169271	0.0104167	0.0078125	0.015625	0.0247396	0.0325521	0.0598958	0.0429688	0.0872396	0.0286458	0.0338542	0.0572917
SP4	ENST00000222584.8	full-splice_match	1	0	0	6077	2352	169	3556	0.383907	0.463632	0.682353	0.316929	0.0510856	0.0791826	0.0600255	0.0715198	0.0715198	0.0446999	0.0153257	0.0587484	0.0613027	0.0651341	0.0651341	0.0676884	0.0332056	0.0485313	0.0293742	0.0485313	0.117497	0.0383142	0.128991	0.0344828	0.0791826	0.0217114	0.0063857	0.0485313	0.0102171	0.0063857	0.0127714	0.00893997	0.0357599	0.0600255	0.0676884	0.0485313	0.0561941	0.0306513	0.0472542	0.0306513
PALS2	ENST00000222644.10	full-splice_match	1	0	0	8346	1620	144	6582	0.352145	0.403335	0.717241	0.33151	0.0853432	0.0426716	0.096475	0.0927644	0.038961	0.0371058	0.0148423	0.0500928	0.0890538	0.0408163	0.0538033	0.0445269	0.0538033	0.0482375	0.0705009	0.0909091	0.0705009	0.0352505	0.0500928	0.0538033	0.0667904	0.0185529	0.00742115	0.0352505	0.00927644	0.00185529	0.012987	0.00927644	0.0408163	0.0333952	0.0426716	0.038961	0.118738	0.0315399	0.0538033	0.0630798
H2AZ2	ENST00000222690.10	full-splice_match	1	0	0	3804	342	106	3356	0.431388	0.539589	0.831776	0.407628	0.0353982	0	0.132743	0.0176991	0.0619469	0.0265487	0	0.0530973	0.0619469	0.0619469	0.0973451	0.0619469	0.00884956	0.0530973	0.0265487	0.0176991	0.0530973	0.079646	0.079646	0.0265487	0.0530973	0	0.0353982	0.0176991	0.00884956	0.0353982	0	0.0353982	0.0353982	0.0619469	0.106195	0.0442478	0.0619469	0.0265487	0.0707965	0.0353982
CAV2	ENST00000222693.5	full-splice_match	1	0	0	2953	486	44	2423	0.363021	0.540206	0.8	0.319439	0.0248447	0.0124224	0.0434783	0.0434783	0.0496894	0.0434783	0.0621118	0.0372671	0.0496894	0.068323	0.0310559	0.0372671	0.0124224	0.0434783	0.0559006	0.0372671	0.0434783	0.0372671	0.0807453	0.0496894	0.0559006	0.0310559	0.0310559	0.0869565	0.0496894	0.0310559	0.0621118	0.0186335	0.0186335	0.0807453	0.0869565	0.0621118	0.0310559	0.0993789	0.0559006	0.0496894
LFNG	ENST00000222725.10	full-splice_match	1	0	0	2445	1137	88	1220	0.631493	0.696303	0.797753	0.559016	0.00793651	0.021164	0.031746	0.0026455	0.031746	0.0529101	0.0529101	0.0291005	0.026455	0.0555556	0.037037	0.015873	0.0026455	0.037037	0.0291005	0	0.031746	0.0714286	0.0529101	0.037037	0.0793651	0.0820106	0.111111	0.0687831	0.0343915	0.116402	0.103175	0.0396825	0.0132275	0.0449735	0.145503	0.026455	0.0238095	0.047619	0.0529101	0.0238095
CHN2	ENST00000222792.11	full-splice_match	1	0	0	3167	1404	167	1596	0.431955	0.467569	0.755952	0.366541	0.0663812	0.0599572	0.0685225	0.0492505	0.0835118	0.0471092	0.0214133	0.0471092	0.0792291	0.0406852	0.0513919	0.0192719	0.0364026	0.0513919	0.0792291	0.0449679	0.0706638	0.0642398	0.0642398	0.0578158	0.0706638	0.0385439	0.0171306	0.0578158	0.0192719	0.00428266	0.0278373	0.0235546	0.0278373	0.0535332	0.0663812	0.0299786	0.0856531	0.0406852	0.0578158	0.0578158
STX1A	ENST00000222812.8	full-splice_match	1	0	0	2102	864	38	1200	0.601808	0.561993	0.769231	0.625	0.0243902	0.0348432	0.087108	0.00696864	0.0627178	0.0522648	0.0348432	0.0209059	0.0940767	0.0766551	0.087108	0.0452962	0.00348432	0.0836237	0.0696864	0.0139373	0.0487805	0.0487805	0.0731707	0.0940767	0.0662021	0.0139373	0.0662021	0.0243902	0.0557491	0.0627178	0.0278746	0.0278746	0.010453	0.0383275	0.0662021	0.0174216	0.0731707	0.0731707	0.132404	0.0662021
NOD1	ENST00000222823.9	full-splice_match	1	0	0	4503	2859	530	1114	0.554963	0.582225	0.538606	0.492819	0.0346639	0.0388655	0.0535714	0.0252101	0.0462185	0.0577731	0.0231092	0.0388655	0.0577731	0.0808824	0.0651261	0.0273109	0.00945378	0.0378151	0.0388655	0.0105042	0.0588235	0.0556723	0.103992	0.0283613	0.0745798	0.052521	0.032563	0.0945378	0.0220588	0.0283613	0.0409664	0.0210084	0.0273109	0.0609244	0.12605	0.0546218	0.0472689	0.0472689	0.0682773	0.0304622
WASL	ENST00000223023.5	full-splice_match	1	0	0	4363	1515	269	2579	0.399954	0.480185	0.711111	0.320279	0.0674603	0.0416667	0.0892857	0.0535714	0.0555556	0.077381	0.00992063	0.0297619	0.0892857	0.0496032	0.0595238	0.0396825	0.0376984	0.0416667	0.0535714	0.0396825	0.0714286	0.0813492	0.0833333	0.0277778	0.107143	0.031746	0.0238095	0.0853175	0.0138889	0.0218254	0.00992063	0.00595238	0.0257937	0.0753968	0.0416667	0.0456349	0.0813492	0.0277778	0.0496032	0.0595238
SERPINE1	ENST00000223095.5	full-splice_match	1	0	0	3156	1206	142	1808	0.515209	0.571784	0.615385	0.46958	0.0174564	0.0399002	0.0598504	0.00997506	0.0548628	0.0573566	0.0349127	0.0399002	0.0623441	0.0648379	0.0598504	0.0374065	0.00498753	0.0399002	0.0623441	0.0174564	0.0598504	0.0673317	0.104738	0.0623441	0.084788	0.0723192	0.0349127	0.084788	0.0249377	0.0274314	0.0299252	0.0124688	0.0224439	0.0698254	0.0822943	0.0473815	0.0498753	0.0648379	0.0523691	0.0399002
MOGAT3	ENST00000223114.9	full-splice_match	1	0	0	2147	1023	182	942	0.550536	0.59002	0.568306	0.504246	0.0117647	0.0235294	0.0441176	0.0176471	0.0294118	0.05	0.0205882	0.0441176	0.0294118	0.0735294	0.0441176	0.0147059	0.00588235	0.0441176	0.0323529	0.0176471	0.0411765	0.0676471	0.0588235	0.05	0.0705882	0.0823529	0.0470588	0.105882	0.0147059	0.0411765	0.0382353	0.0264706	0.0294118	0.0911765	0.0882353	0.0970588	0.0323529	0.0264706	0.0470588	0.0117647
C1GALT1	ENST00000223122.4	full-splice_match	1	0	0	1777	1089	62	626	0.356781	0.379596	0.301587	0.322684	0.0911602	0.0607735	0.0911602	0.0607735	0.0607735	0.0441989	0.0138122	0.0441989	0.104972	0.0441989	0.0414365	0.0359116	0.0469613	0.0414365	0.0828729	0.0773481	0.0635359	0.0220994	0.058011	0.058011	0.0359116	0.019337	0.00276243	0.0662983	0.00276243	0	0.00276243	0.019337	0.0524862	0.0276243	0.0497238	0.0552486	0.104972	0.0331492	0.0414365	0.0635359
RPA3	ENST00000223129.8	full-splice_match	1	0	0	2020	363	1172	485	0.458911	0.441989	0.520034	0.323711	0.0583333	0.0416667	0.0833333	0.0583333	0.0416667	0.0416667	0.00833333	0.025	0.0583333	0.0333333	0.05	0.0416667	0.00833333	0.0916667	0.1	0.05	0.05	0.0166667	0.0333333	0.0916667	0.075	0.0333333	0.025	0.0416667	0.0166667	0.025	0.0166667	0.00833333	0.00833333	0.025	0.0416667	0.0916667	0.116667	0.0416667	0.0333333	0.075
GLCCI1	ENST00000223145.10	full-splice_match	1	0	0	4741	1641	555	2545	0.47163	0.579268	0.73741	0.344204	0.03663	0.0421245	0.0494505	0.025641	0.0494505	0.043956	0.018315	0.0347985	0.0567766	0.0915751	0.0531136	0.043956	0.0164835	0.0457875	0.0384615	0.014652	0.0531136	0.040293	0.119048	0.043956	0.0641026	0.0659341	0.0732601	0.0732601	0.010989	0.0604396	0.0677656	0.032967	0.0274725	0.0879121	0.0604396	0.03663	0.040293	0.0347985	0.0586081	0.029304
NRF1	ENST00000223190.8	full-splice_match	1	0	0	2424	1509	78	837	0.507838	0.538462	0.696203	0.434886	0.0398406	0.0557769	0.0498008	0.0219124	0.0657371	0.061753	0.0338645	0.0418327	0.0657371	0.0717131	0.059761	0.0458167	0.0219124	0.0398406	0.061753	0.0199203	0.0498008	0.061753	0.119522	0.0537849	0.0916335	0.0398406	0.0278884	0.0478088	0.0159363	0.0298805	0.0338645	0.0199203	0.0239044	0.0438247	0.0836653	0.0398406	0.0577689	0.0517928	0.0577689	0.0378486
ZNF862	ENST00000223210.5	full-splice_match	1	0	0	6942	3507	237	3198	0.572746	0.575014	0.726891	0.558787	0.0265411	0.0265411	0.0599315	0.0239726	0.0436644	0.0488014	0.0256849	0.0342466	0.0684932	0.0693493	0.0907534	0.0325342	0.0136986	0.0410959	0.0488014	0.0214041	0.0496575	0.0453767	0.0958904	0.0530822	0.0847603	0.052226	0.0410959	0.0693493	0.0179795	0.0291096	0.0368151	0.0239726	0.0162671	0.0616438	0.101027	0.0265411	0.0530822	0.0530822	0.0950342	0.0385274
MRPL32	ENST00000223324.3	full-splice_match	1	0	0	859	564	11	284	0.433062	0.515098	0.5	0.267606	0.0588235	0.0427807	0.0909091	0.0374332	0.0641711	0.0481283	0.0320856	0.0320856	0.117647	0.0695187	0.0481283	0.0427807	0.026738	0.0320856	0.0374332	0.026738	0.0374332	0.0320856	0.106952	0.0481283	0.0748663	0.0374332	0.0481283	0.0427807	0.026738	0.026738	0.0374332	0.0213904	0.0213904	0.0160428	0.0695187	0.0481283	0.106952	0.0641711	0.0588235	0.026738
AEBP1	ENST00000223357.8	full-splice_match	1	0	0	4097	3474	321	302	0.624115	0.619349	0.726708	0.569536	0.0164218	0.0363008	0.0639585	0.0121003	0.0449438	0.0803803	0.0380294	0.0363008	0.0708729	0.0691443	0.0942092	0.0328436	0.00777874	0.0302506	0.0440795	0.0129646	0.0553155	0.0613656	0.0691443	0.0432152	0.102852	0.0890233	0.059637	0.0700086	0.0406223	0.0475367	0.0466724	0.0146932	0.0345722	0.0388937	0.0786517	0.0233362	0.0527226	0.0674157	0.12446	0.0276577
POLD2	ENST00000223361.7	full-splice_match	1	0	0	1597	1365	143	89	0.590482	0.598974	0.576389	0.483146	0.0176211	0.0330396	0.0286344	0.0154185	0.0440529	0.0682819	0.030837	0.0418502	0.0506608	0.0881057	0.0528634	0.0374449	0.0132159	0.0330396	0.0352423	0.0176211	0.0396476	0.0726872	0.112335	0.0352423	0.101322	0.0770925	0.0396476	0.0903084	0.0198238	0.0330396	0.0330396	0.0198238	0.0242291	0.0550661	0.112335	0.0352423	0.0286344	0.0528634	0.0748899	0.0352423
MYL7	ENST00000223364.7	full-splice_match	1	0	0	612	525	27	60	0.571895	0.570611	0.571429	0.583333	0.0172414	0.0344828	0.103448	0.0114943	0.0517241	0.0689655	0.0287356	0.0229885	0.0804598	0.0862069	0.103448	0.0344828	0.00574713	0.0517241	0.0517241	0	0.091954	0.0344828	0.103448	0.0689655	0.103448	0.0689655	0.0229885	0.0517241	0.0229885	0.0229885	0.0229885	0.0229885	0.0172414	0.0344828	0.0689655	0.045977	0.0632184	0.0804598	0.0977011	0.0229885
CLIP2	ENST00000223398.11	full-splice_match	1	0	0	5623	3138	395	2090	0.634537	0.639464	0.755051	0.604306	0.0181818	0.0258373	0.0813397	0.0105263	0.0363636	0.0497608	0.0344498	0.0277512	0.0727273	0.100478	0.0976077	0.0344498	0.00191388	0.0315789	0.0267943	0.00861244	0.04689	0.045933	0.101435	0.0277512	0.0842105	0.0574163	0.0478469	0.0564593	0.0382775	0.0411483	0.0784689	0.0267943	0.0124402	0.0526316	0.104306	0.0143541	0.0660287	0.0631579	0.114833	0.0248804
ZNF510	ENST00000223428.9	full-splice_match	1	0	0	6507	2049	230	4228	0.404641	0.391113	0.558442	0.402791	0.115836	0.085044	0.068915	0.129032	0.0762463	0.042522	0.00733138	0.0527859	0.107038	0.0293255	0.0439883	0.0410557	0.0454545	0.0659824	0.0762463	0.0557185	0.0733138	0.042522	0.0879765	0.058651	0.0381232	0.0234604	0.00439883	0.0454545	0.00439883	0.00293255	0.00879765	0.00439883	0.0190616	0.0469208	0.0366569	0.0439883	0.14956	0.0219941	0.0601173	0.0234604
FKTN	ENST00000223528.6	full-splice_match	1	0	0	7364	1383	124	5857	0.379006	0.411722	0.416	0.370497	0.0717391	0.0543478	0.0847826	0.0630435	0.0586957	0.0282609	0.0108696	0.0804348	0.0652174	0.0413043	0.0478261	0.0608696	0.0369565	0.0391304	0.0630435	0.0717391	0.076087	0.0413043	0.05	0.0369565	0.0456522	0.0173913	0.0108696	0.0413043	0.0173913	0.00652174	0.0108696	0.00869565	0.0369565	0.0304348	0.0782609	0.0521739	0.0934783	0.0369565	0.0434783	0.0565217
C5	ENST00000223642.3	full-splice_match	1	0	0	5464	5028	29	407	0.399524	0.400835	0.5	0.375921	0.0871642	0.0525373	0.081194	0.078209	0.0638806	0.0334328	0.0125373	0.0483582	0.0746269	0.0453731	0.0441791	0.0525373	0.0519403	0.0495522	0.0549254	0.078806	0.0758209	0.0316418	0.0710448	0.0525373	0.0519403	0.0214925	0.00656716	0.0453731	0.0119403	0.00537313	0.00597015	0.0107463	0.0274627	0.0334328	0.0668657	0.0555224	0.0841791	0.0322388	0.041791	0.0531343
AK1	ENST00000223836.10	full-splice_match	1	0	0	736	630	96	10	0.599185	0.580286	0.731959	0.5	0.0382775	0.0239234	0.0861244	0.0143541	0.0430622	0.076555	0.0382775	0.0143541	0.100478	0.0526316	0.0717703	0.0334928	0.00478469	0.0334928	0.0478469	0.0191388	0.0526316	0.0430622	0.0861244	0.0382775	0.0861244	0.0478469	0.0287081	0.0574163	0.0239234	0.0334928	0.0478469	0.0239234	0.0239234	0.0526316	0.0909091	0.0287081	0.0669856	0.0813397	0.0909091	0.0334928
ELAVL2	ENST00000223951.10	full-splice_match	1	0	0	3763	1038	269	2456	0.38161	0.451302	0.688889	0.318404	0.0724638	0.0869565	0.0637681	0.0724638	0.0782609	0.0637681	0.0144928	0.0492754	0.0608696	0.0608696	0.057971	0.0347826	0.0463768	0.0318841	0.0666667	0.0405797	0.115942	0.0463768	0.0869565	0.0289855	0.0869565	0.026087	0.0115942	0.0463768	0.0115942	0.0144928	0.0115942	0.0144928	0.0405797	0.0347826	0.0521739	0.0492754	0.057971	0.0637681	0.0492754	0.0289855
SETX	ENST00000224140.6	full-splice_match	1	0	0	11101	8031	184	2886	0.410504	0.408593	0.540541	0.407484	0.0937967	0.0530643	0.0896861	0.068012	0.063154	0.0328849	0.0153214	0.04858	0.0923019	0.0455904	0.0455904	0.0549327	0.043722	0.0440957	0.0650224	0.0653961	0.0665172	0.0328849	0.0769806	0.049701	0.0549327	0.0198057	0.00971599	0.0407324	0.0153214	0.0044843	0.00822123	0.0138266	0.0317638	0.0399851	0.0564275	0.0549327	0.0941704	0.038864	0.0508221	0.0605381
ATE1	ENST00000224652.12	full-splice_match	1	0	0	4895	1554	82	3259	0.393667	0.458467	0.819277	0.351948	0.0793037	0.0425532	0.0851064	0.0425532	0.0464217	0.0522244	0.0174081	0.0444874	0.0696325	0.0444874	0.0638298	0.0580271	0.0251451	0.0386847	0.0560928	0.0580271	0.0638298	0.0444874	0.0831721	0.0483559	0.0715667	0.0290135	0.0193424	0.0425532	0.0232108	0.0135397	0.0174081	0.0154739	0.0348162	0.0367505	0.0560928	0.0464217	0.0754352	0.0290135	0.0560928	0.0560928
CDH23	ENST00000224721.12	full-splice_match	1	0	0	11138	10062	404	672	0.592117	0.587516	0.77037	0.553571	0.00685953	0.0432449	0.0289293	0.0250522	0.0656129	0.0852967	0.0423501	0.0381748	0.0417537	0.0563674	0.0536833	0.0274381	0.00805249	0.0629287	0.054578	0.0146138	0.0596481	0.0727707	0.0826126	0.0668058	0.099314	0.0515956	0.0465255	0.0760513	0.0345959	0.0360871	0.0426484	0.029824	0.0259469	0.0465255	0.0954369	0.0381748	0.0339994	0.0799284	0.063227	0.0393677
CCSER2	ENST00000224756.12	full-splice_match	1	0	0	7664	2502	185	4977	0.384003	0.405438	0.672043	0.362467	0.0960384	0.0516206	0.0756303	0.0828331	0.062425	0.0480192	0.00840336	0.0444178	0.0804322	0.0420168	0.0468187	0.0456182	0.0564226	0.0492197	0.090036	0.0588235	0.0564226	0.0432173	0.0732293	0.060024	0.0744298	0.0228091	0.00960384	0.0456182	0.0108043	0.00480192	0.0060024	0.0060024	0.0336134	0.0408163	0.0492197	0.0516206	0.0996399	0.0372149	0.0396158	0.0696279
TBC1D12	ENST00000225235.5	full-splice_match	1	0	0	5637	2325	73	3239	0.430371	0.542599	0.662162	0.344551	0.0503876	0.0245478	0.0620155	0.0542636	0.0335917	0.0258398	0.0297158	0.0335917	0.0581395	0.0516796	0.0658915	0.0400517	0.0310078	0.0439276	0.0400517	0.0503876	0.0400517	0.0335917	0.0645995	0.0348837	0.0439276	0.0310078	0.0658915	0.0516796	0.0335917	0.0633075	0.0749354	0.0129199	0.0193798	0.0400517	0.0671835	0.0490956	0.0775194	0.0413437	0.0684755	0.0439276
DHX33	ENST00000225296.8	full-splice_match	1	0	0	5535	2121	123	3291	0.487082	0.550943	0.741935	0.436342	0.0368272	0.0382436	0.0651558	0.0240793	0.0524079	0.0566572	0.0226629	0.0269122	0.0694051	0.0708215	0.0651558	0.0424929	0.0184136	0.0453258	0.0524079	0.0254958	0.0538244	0.0467422	0.0949008	0.0495751	0.0764873	0.0467422	0.0424929	0.0736544	0.0254958	0.0325779	0.0424929	0.0184136	0.0254958	0.0609065	0.0878187	0.0467422	0.0609065	0.0467422	0.0736544	0.0481586
NUFIP2	ENST00000225388.9	full-splice_match	1	0	0	10877	2085	89	8703	0.373908	0.449616	0.588889	0.353556	0.0907781	0.0648415	0.0778098	0.0634006	0.0518732	0.0662824	0.00864553	0.0518732	0.0634006	0.0835735	0.0533141	0.0576369	0.0504323	0.0576369	0.0489914	0.0302594	0.0763689	0.0504323	0.0979827	0.0389049	0.0864553	0.0317003	0.0100865	0.0590778	0.0115274	0.0100865	0.0100865	0.00144092	0.0518732	0.0331412	0.0720461	0.0417867	0.0821326	0.0345821	0.0475504	0.0360231
GIT1	ENST00000225394.8	full-splice_match	1	0	0	3783	2283	270	1230	0.630452	0.612621	0.867159	0.611382	0.0197368	0.0289474	0.0644737	0.0105263	0.0578947	0.0592105	0.0368421	0.0368421	0.0605263	0.102632	0.0605263	0.0368421	0.00263158	0.0328947	0.0381579	0.0118421	0.0526316	0.0710526	0.109211	0.0381579	0.0934211	0.0657895	0.0473684	0.0723684	0.0355263	0.0447368	0.0552632	0.0118421	0.0197368	0.0552632	0.110526	0.0342105	0.0447368	0.0697368	0.0842105	0.025
RUNDC3A	ENST00000225441.11	full-splice_match	1	0	0	1821	1215	237	369	0.601867	0.607084	0.743697	0.493225	0.019802	0.0321782	0.0594059	0.0173267	0.039604	0.0594059	0.0470297	0.0321782	0.0594059	0.138614	0.0569307	0.0272277	0.0049505	0.0470297	0.0371287	0.00742574	0.0420792	0.0643564	0.10396	0.0445545	0.0717822	0.0445545	0.0470297	0.049505	0.039604	0.0544554	0.0693069	0.0272277	0.0272277	0.0519802	0.10396	0.019802	0.0569307	0.0569307	0.111386	0.029703
WNT3	ENST00000225512.6	full-splice_match	1	0	0	3287	1065	95	2127	0.506845	0.635338	0.541667	0.440997	0.00847458	0.0282486	0.0508475	0.0141243	0.0451977	0.059322	0.0423729	0.039548	0.0310734	0.0536723	0.0536723	0.0367232	0.00564972	0.039548	0.0310734	0.0112994	0.0564972	0.079096	0.0536723	0.0480226	0.0960452	0.0508475	0.0564972	0.079096	0.0451977	0.0649718	0.0762712	0.0310734	0.0169492	0.0706215	0.110169	0.0338983	0.0338983	0.0564972	0.0649718	0.0169492
PNPO	ENST00000225573.5	full-splice_match	1	0	0	2256	654	109	1493	0.496897	0.563553	0.636364	0.457468	0.0414747	0.0368664	0.0506912	0.0184332	0.0184332	0.101382	0.0138249	0.0414747	0.0599078	0.0230415	0.0691244	0.0506912	0.00921659	0.0230415	0.0599078	0.00921659	0.0368664	0.0368664	0.0552995	0.0414747	0.0691244	0.0552995	0.0368664	0.0875576	0.0276498	0.0322581	0.0414747	0.0184332	0.0414747	0.0414747	0.115207	0.0645161	0.0552995	0.0691244	0.0829493	0.0276498
TVP23C	ENST00000225576.7	full-splice_match	1	0	0	1527	828	96	603	0.528487	0.493349	0.71134	0.547264	0.0363636	0.0218182	0.0545455	0.0581818	0.0363636	0.0145455	0.0181818	0.0509091	0.0763636	0.0436364	0.0472727	0.0545455	0.0218182	0.0618182	0.04	0.0436364	0.0436364	0.04	0.0690909	0.0436364	0.0509091	0.0327273	0.0327273	0.0545455	0.0181818	0.0363636	0.0290909	0.0218182	0.0181818	0.0509091	0.0727273	0.0727273	0.0654545	0.04	0.0690909	0.0436364
GALK1	ENST00000225614.6	full-splice_match	1	0	0	1445	1176	100	169	0.656055	0.654468	0.782178	0.591716	0.00767263	0.0153453	0.0332481	0.00767263	0.0306905	0.0409207	0.0306905	0.0460358	0.0358056	0.102302	0.0588235	0.028133	0.00255754	0.0153453	0.0409207	0.00767263	0.0358056	0.0613811	0.102302	0.0306905	0.084399	0.0613811	0.0613811	0.0767263	0.0255754	0.0511509	0.0741688	0.0153453	0.0255754	0.0767263	0.112532	0.0358056	0.0179028	0.0485934	0.084399	0.0153453
CPD	ENST00000225719.9	full-splice_match	1	0	0	9372	4140	54	5178	0.40557	0.471612	0.763636	0.348976	0.0551124	0.0565627	0.0580131	0.0645395	0.0601885	0.0449601	0.0116026	0.0500363	0.0645395	0.0406091	0.0529369	0.0420595	0.0391588	0.0529369	0.066715	0.0551124	0.0645395	0.0391588	0.066715	0.0529369	0.0652647	0.0290065	0.0333575	0.0471356	0.0275562	0.026831	0.0319072	0.00797679	0.0362582	0.0340827	0.062364	0.0551124	0.075417	0.0384336	0.0514866	0.0522117
C17orf75	ENST00000225805.8	full-splice_match	1	0	0	4581	1188	70	3323	0.421305	0.442291	0.704225	0.407764	0.0734177	0.0455696	0.0936709	0.0531646	0.0556962	0.0202532	0.0101266	0.0481013	0.0708861	0.0708861	0.0759494	0.0531646	0.0227848	0.0278481	0.0708861	0.043038	0.0531646	0.0177215	0.0835443	0.0481013	0.043038	0.0177215	0.0202532	0.0405063	0.0278481	0.00759494	0.0101266	0.00759494	0.0278481	0.0329114	0.0632911	0.0708861	0.0911392	0.0379747	0.0810127	0.043038
ASIC2	ENST00000225823.7	full-splice_match	1	0	0	3750	1689	1180	881	0.618133	0.59064	0.726503	0.525539	0.0266904	0.0391459	0.0409253	0.019573	0.0569395	0.0533808	0.0213523	0.0338078	0.0516014	0.0622776	0.0516014	0.0302491	0.0124555	0.0302491	0.0391459	0.0302491	0.0516014	0.0498221	0.0729537	0.0391459	0.0498221	0.0427046	0.0765125	0.069395	0.0284698	0.0711744	0.0569395	0.0124555	0.019573	0.0480427	0.101423	0.0516014	0.0409253	0.0427046	0.0782918	0.0320285
KAT2A	ENST00000225916.10	full-splice_match	1	0	0	3115	2511	63	541	0.599358	0.596813	0.78125	0.589649	0.0191388	0.0263158	0.069378	0.0191388	0.0322967	0.0645933	0.0203349	0.0358852	0.0514354	0.0861244	0.0669856	0.0334928	0.00478469	0.0406699	0.0454545	0.0191388	0.0586124	0.0478469	0.0801435	0.0490431	0.076555	0.0861244	0.0598086	0.0669856	0.034689	0.0370813	0.0490431	0.0119617	0.0311005	0.0466507	0.102871	0.041866	0.0490431	0.0502392	0.0861244	0.0311005
NAGLU	ENST00000225927.7	full-splice_match	1	0	0	2475	2229	32	214	0.640404	0.646768	0.727273	0.560748	0.00808625	0.0229111	0.0242588	0.0134771	0.0309973	0.0566038	0.0175202	0.0377358	0.0363881	0.0754717	0.0619946	0.0202156	0.00808625	0.0242588	0.0377358	0.00943396	0.0377358	0.0458221	0.0929919	0.0296496	0.074124	0.0566038	0.0700809	0.0943396	0.0296496	0.0525606	0.0660377	0.0202156	0.0309973	0.0485175	0.137466	0.0471698	0.0215633	0.0377358	0.0673854	0.0215633
HSD17B1	ENST00000225929.5	full-splice_match	1	0	0	1265	987	0	278	0.643478	0.666329	0	0.564748	0.0121951	0.0152439	0.0335366	0.0121951	0.0213415	0.0579268	0.0487805	0.0182927	0.0304878	0.0396341	0.0762195	0.0243902	0.00304878	0.027439	0.0335366	0.00609756	0.027439	0.0487805	0.0518293	0.0243902	0.0487805	0.054878	0.0945122	0.0792683	0.0396341	0.0823171	0.0884146	0.0518293	0.00914634	0.0335366	0.115854	0.0487805	0.027439	0.0640244	0.0792683	0.0243902
HLF	ENST00000226067.10	full-splice_match	1	0	0	5721	885	525	4311	0.432442	0.570136	0.547529	0.390165	0.047619	0.0408163	0.0816327	0.0238095	0.0408163	0.0680272	0.0272109	0.0238095	0.0748299	0.0748299	0.0578231	0.037415	0.0170068	0.047619	0.0612245	0.0136054	0.0544218	0.037415	0.102041	0.0612245	0.0986395	0.115646	0.0408163	0.105442	0.0170068	0.047619	0.037415	0.00680272	0.0102041	0.0646259	0.0884354	0.0408163	0.0816327	0.0578231	0.0578231	0.0340136
RANGRF	ENST00000226105.11	full-splice_match	1	0	0	831	558	119	154	0.559567	0.590664	0.583333	0.428571	0.0162162	0.0324324	0.0486486	0.0162162	0.0324324	0.0648649	0.0378378	0.0324324	0.0378378	0.0810811	0.0594595	0.0324324	0.0108108	0.0540541	0.0162162	0.00540541	0.0378378	0.0378378	0.0918919	0.0432432	0.0756757	0.0756757	0.0432432	0.0918919	0.0378378	0.027027	0.0378378	0.027027	0.0162162	0.0378378	0.124324	0.0648649	0.0432432	0.0756757	0.0540541	0.027027
CD38	ENST00000226279.8	full-splice_match	1	0	0	5620	900	87	4633	0.422776	0.490545	0.647727	0.405353	0.0468227	0.0468227	0.0668896	0.0468227	0.0635452	0.0434783	0.00668896	0.0501672	0.0802676	0.0434783	0.0434783	0.0434783	0.0267559	0.0602007	0.0501672	0.0434783	0.0769231	0.0434783	0.0769231	0.0468227	0.0602007	0.0401338	0.0334448	0.0568562	0.0167224	0.0234114	0.0267559	0.0234114	0.0267559	0.0234114	0.090301	0.0501672	0.0602007	0.0535117	0.0602007	0.0535117
RUFY3	ENST00000226328.8	full-splice_match	1	0	0	4233	1407	563	2263	0.381526	0.438122	0.391844	0.343791	0.0811966	0.0747863	0.113248	0.0598291	0.0576923	0.0405983	0.0149573	0.0641026	0.123932	0.0576923	0.0534188	0.0384615	0.0213675	0.042735	0.0833333	0.0448718	0.0705128	0.0235043	0.0790598	0.0512821	0.0470085	0.017094	0.00854701	0.042735	0.0149573	0.00854701	0.0106838	0.00213675	0.0363248	0.0405983	0.0790598	0.0555556	0.128205	0.0534188	0.0641026	0.0598291
LAMTOR3	ENST00000226522.8	full-splice_match	1	0	0	1220	351	79	790	0.361475	0.411429	0.575	0.317722	0.0603448	0.0431034	0.103448	0.0431034	0.0344828	0.0689655	0	0.0603448	0.0603448	0.0603448	0.0431034	0.0689655	0.0517241	0.0344828	0.0344828	0.0517241	0.0689655	0.0172414	0.0689655	0.0517241	0.0862069	0.00862069	0	0.0603448	0.0172414	0	0.00862069	0.00862069	0.0431034	0.0172414	0.0344828	0.0775862	0.0603448	0.0517241	0.0431034	0.0344828
NFKB1	ENST00000226574.9	full-splice_match	1	0	0	4055	2907	437	711	0.500863	0.488988	0.796804	0.367089	0.0619835	0.0454545	0.0681818	0.0433884	0.0640496	0.0475207	0.0144628	0.053719	0.0671488	0.0630165	0.0650826	0.0382231	0.0289256	0.0392562	0.0733471	0.0382231	0.0599174	0.0464876	0.0826446	0.0433884	0.0630165	0.0247934	0.0165289	0.0568182	0.0123967	0.0154959	0.017562	0.0123967	0.0392562	0.0433884	0.088843	0.0464876	0.071281	0.0557851	0.0588843	0.052686
KLHL2	ENST00000226725.11	full-splice_match	1	0	0	3185	1779	316	1090	0.434537	0.449381	0.791798	0.306422	0.0439189	0.0388514	0.0777027	0.0608108	0.0608108	0.0439189	0.0135135	0.0236486	0.0777027	0.0523649	0.0641892	0.0675676	0.0388514	0.0202703	0.10473	0.0506757	0.0523649	0.0304054	0.0793919	0.0591216	0.0388514	0.0253378	0.0236486	0.0320946	0.0185811	0.0135135	0.0135135	0.00844595	0.0219595	0.0202703	0.0489865	0.0472973	0.0878378	0.0337838	0.0726351	0.0439189
FAM149A	ENST00000227065.8	full-splice_match	1	0	0	2708	1446	579	683	0.512925	0.518339	0.658621	0.377745	0.0623701	0.0561331	0.0561331	0.027027	0.0893971	0.035343	0.039501	0.04158	0.0852391	0.043659	0.0540541	0.049896	0.014553	0.029106	0.047817	0.039501	0.0519751	0.0686071	0.106029	0.04158	0.049896	0.049896	0.04158	0.0582121	0.016632	0.037422	0.035343	0.029106	0.016632	0.0561331	0.0706861	0.039501	0.0810811	0.0686071	0.0540541	0.04158
LDHA	ENST00000227157.8	full-splice_match	1	0	0	1887	723	75	1089	0.409115	0.451524	0.592105	0.368228	0.0583333	0.0541667	0.0958333	0.0583333	0.0416667	0.0291667	0.0208333	0.0375	0.0791667	0.0458333	0.0458333	0.0375	0.0333333	0.05	0.0625	0.0625	0.0541667	0.025	0.0666667	0.0458333	0.0458333	0.0291667	0.0208333	0.0333333	0.0125	0	0.0125	0.0291667	0.025	0.0291667	0.0666667	0.0583333	0.0875	0.0291667	0.0333333	0.0708333
CTSC	ENST00000227266.10	full-splice_match	1	0	0	1870	1389	64	417	0.445989	0.486311	0.584615	0.290168	0.0367965	0.0367965	0.0757576	0.047619	0.0454545	0.0562771	0.00649351	0.0649351	0.0541126	0.047619	0.0454545	0.038961	0.0281385	0.030303	0.0757576	0.047619	0.0692641	0.0454545	0.0497835	0.0454545	0.0649351	0.0324675	0.0194805	0.0606061	0.0151515	0.0151515	0.0194805	0.00649351	0.0454545	0.04329	0.0974026	0.0627706	0.0692641	0.0411255	0.04329	0.0411255
JHY	ENST00000227349.7	full-splice_match	1	0	0	7057	2334	303	4420	0.417458	0.450064	0.680921	0.382127	0.105534	0.0746461	0.117117	0.0656371	0.0746461	0.0553411	0.027027	0.039897	0.0978121	0.0759331	0.048906	0.036036	0.034749	0.0527671	0.046332	0.032175	0.106821	0.042471	0.0823681	0.03861	0.0746461	0.029601	0.018018	0.0514801	0.023166	0.010296	0.016731	0.020592	0.02574	0.0540541	0.0540541	0.0527671	0.114543	0.048906	0.0540541	0.030888
HSPA8	ENST00000227378.7	full-splice_match	1	0	0	2186	1938	8	240	0.450595	0.465152	0.555556	0.329167	0.0387597	0.0527132	0.106977	0.0465116	0.0511628	0.055814	0.0186047	0.0511628	0.0945736	0.0496124	0.055814	0.0356589	0.0186047	0.0341085	0.0713178	0.0573643	0.0883721	0.0403101	0.0620155	0.0356589	0.0682171	0.027907	0.0139535	0.0527132	0.0155039	0.00775194	0.00930233	0.020155	0.0325581	0.0387597	0.0806202	0.0573643	0.096124	0.0496124	0.0620155	0.0604651
DTX4	ENST00000227451.4	full-splice_match	1	0	0	6003	1857	464	3682	0.547893	0.601832	0.789247	0.490223	0.0242718	0.0420712	0.0582524	0.02589	0.0582524	0.0906149	0.0226537	0.0323625	0.0469256	0.0582524	0.0533981	0.0436893	0.00485437	0.0469256	0.0453074	0.0145631	0.0550162	0.0760518	0.101942	0.0566343	0.12945	0.079288	0.0517799	0.0873786	0.0242718	0.0420712	0.0339806	0.0226537	0.0355987	0.0501618	0.092233	0.0177994	0.0550162	0.0533981	0.038835	0.0226537
RPS13	ENST00000228140.6	full-splice_match	1	0	0	491	444	25	22	0.456212	0.465011	0.576923	0.136364	0.047619	0.0136054	0.115646	0.0612245	0.0544218	0.0272109	0.0272109	0.0340136	0.0748299	0.0544218	0.0408163	0.0408163	0.0340136	0.0612245	0.0272109	0.0680272	0.0544218	0.0340136	0.0544218	0.0544218	0.0408163	0.047619	0.0204082	0.0748299	0.0340136	0.0204082	0.0272109	0.0272109	0.0272109	0.0612245	0.0680272	0.0544218	0.0816327	0.047619	0.0340136	0.047619
DDX11	ENST00000228264.10	full-splice_match	1	0	0	3717	2640	119	958	0.578423	0.582797	0.575	0.566806	0.0204778	0.0341297	0.0784983	0.0125142	0.0284414	0.039818	0.0273038	0.0273038	0.0853242	0.0887372	0.0967008	0.0284414	0.0113766	0.0341297	0.0375427	0.0216155	0.0352673	0.032992	0.117179	0.0375427	0.0671217	0.0500569	0.036405	0.0796359	0.0284414	0.0170648	0.0420933	0.0170648	0.0159272	0.0420933	0.118316	0.0341297	0.0807736	0.0352673	0.0944255	0.0420933
SART3	ENST00000228284.8	full-splice_match	1	0	0	3704	2943	5	756	0.512149	0.525493	0.5	0.460317	0.0520408	0.0397959	0.0969388	0.0244898	0.0387755	0.044898	0.0193878	0.0357143	0.102041	0.072449	0.0867347	0.0459184	0.0163265	0.0336735	0.0602041	0.027551	0.0469388	0.0285714	0.0928571	0.0367347	0.0530612	0.0397959	0.0377551	0.0510204	0.0336735	0.0214286	0.0265306	0.0244898	0.0234694	0.0408163	0.077551	0.0377551	0.0969388	0.0418367	0.102041	0.0520408
ZNF268	ENST00000228289.9	full-splice_match	1	0	0	3543	2841	206	496	0.410387	0.41338	0.594203	0.316532	0.0972516	0.0602537	0.0708245	0.0835095	0.077167	0.051797	0.00528541	0.0317125	0.0676533	0.0560254	0.0486258	0.0665962	0.05074	0.0412262	0.0940803	0.0570825	0.0581395	0.0401691	0.100423	0.0877378	0.0401691	0.0200846	0.00422833	0.0581395	0.00634249	0.00422833	0.00422833	0.00211416	0.0243129	0.0348837	0.0243129	0.0528541	0.128964	0.0147992	0.0591966	0.0211416
PXN	ENST00000228307.11	full-splice_match	1	0	0	3785	1773	142	1870	0.586526	0.623025	0.811189	0.534759	0.0169492	0.0457627	0.0508475	0.0101695	0.0389831	0.0644068	0.0423729	0.0457627	0.0389831	0.1	0.0525424	0.0288136	0.00847458	0.0288136	0.0271186	0.00677966	0.0525424	0.0661017	0.0881356	0.0338983	0.0864407	0.0915254	0.0525424	0.0847458	0.0355932	0.0389831	0.059322	0.0271186	0.0254237	0.0559322	0.10339	0.0559322	0.0457627	0.0525424	0.079661	0.0220339
SLC25A3	ENST00000228318.8	full-splice_match	1	0	0	5987	1086	59	4842	0.43394	0.494931	0.516667	0.419248	0.033241	0.0277008	0.0803324	0.0304709	0.0470914	0.0304709	0.0138504	0.0526316	0.0498615	0.0637119	0.0526316	0.0387812	0.033241	0.0277008	0.0581717	0.0443213	0.0415512	0.0443213	0.0747922	0.0387812	0.0443213	0.0415512	0.033241	0.0581717	0.0138504	0.0360111	0.0110803	0.0193906	0.0360111	0.0692521	0.0858726	0.0581717	0.0609418	0.0360111	0.033241	0.0415512
POLR3B	ENST00000228347.9	full-splice_match	1	0	0	4183	3399	132	652	0.436051	0.439965	0.609023	0.380368	0.0715548	0.0468198	0.0759717	0.0600707	0.0609541	0.0388693	0.0185512	0.0388693	0.0812721	0.0424028	0.04947	0.0432862	0.045053	0.0397527	0.0848057	0.0600707	0.0538869	0.0300353	0.0689046	0.0627208	0.0689046	0.0362191	0.0185512	0.0273852	0.0185512	0.00883392	0.0167845	0.0185512	0.0335689	0.0282686	0.0521201	0.0521201	0.085689	0.0432862	0.0485866	0.0574205
PPFIBP1	ENST00000228425.11	full-splice_match	1	0	0	5983	3015	283	2685	0.425706	0.448905	0.503521	0.391434	0.0806773	0.0557769	0.110558	0.0507968	0.0577689	0.0338645	0.0109562	0.0458167	0.116534	0.0418327	0.0587649	0.0517928	0.0219124	0.0527888	0.0727092	0.0488048	0.0667331	0.0298805	0.0866534	0.0507968	0.0677291	0.0278884	0.00996016	0.0328685	0.0139442	0.00896414	0.0129482	0.0109562	0.0239044	0.0388446	0.0577689	0.0488048	0.115538	0.0448207	0.0577689	0.0766932
ASIC1	ENST00000228468.8	full-splice_match	1	0	0	4072	1722	385	1965	0.58276	0.577571	0.782383	0.548092	0.0296684	0.0366492	0.0575916	0.0122164	0.0488656	0.0575916	0.0401396	0.0453752	0.0558464	0.0680628	0.061082	0.026178	0.0122164	0.0383944	0.0541012	0.0122164	0.0645724	0.0471204	0.0715532	0.0645724	0.0802792	0.0418848	0.0279232	0.0907504	0.0401396	0.0226876	0.0331588	0.0209424	0.0279232	0.0488656	0.122164	0.0506108	0.0401396	0.0628272	0.0750436	0.0279232
SYT10	ENST00000228567.7	full-splice_match	1	0	0	4461	1569	297	2595	0.377494	0.447704	0.634228	0.305588	0.0881226	0.0632184	0.0727969	0.0421456	0.0727969	0.0478927	0.0191571	0.0517241	0.0708812	0.0478927	0.0517241	0.0498084	0.0249042	0.0421456	0.0536398	0.0574713	0.0536398	0.045977	0.0823755	0.0498084	0.0613027	0.0268199	0.0191571	0.0574713	0.0249042	0.00957854	0.0153257	0.0153257	0.032567	0.032567	0.0747126	0.0536398	0.0900383	0.0498084	0.045977	0.0517241
CYP27B1	ENST00000228606.9	full-splice_match	1	0	0	2372	1524	37	811	0.563238	0.627708	0.552632	0.442663	0.0157791	0.0157791	0.0414201	0.0157791	0.035503	0.0552268	0.0374753	0.0374753	0.0512821	0.0591716	0.0532544	0.0394477	0.00394477	0.0197239	0.0216963	0.0197239	0.0335306	0.0591716	0.0808679	0.0276134	0.0769231	0.086785	0.061144	0.0788955	0.0315582	0.0710059	0.0591716	0.0216963	0.025641	0.061144	0.118343	0.0394477	0.035503	0.0650888	0.0710059	0.00788955
MYF6	ENST00000228641.4	full-splice_match	1	0	0	1329	726	86	517	0.485327	0.572414	0.482759	0.363636	0.0456432	0.0414938	0.0746888	0.0207469	0.0248963	0.0539419	0.0124481	0.033195	0.0539419	0.0746888	0.0871369	0.0373444	0.00829876	0.0373444	0.0373444	0.0373444	0.0497925	0.0248963	0.0871369	0.0207469	0.0746888	0.0497925	0.0290456	0.0829876	0.0373444	0.0248963	0.0539419	0.0165975	0.0248963	0.0373444	0.0995851	0.0497925	0.0746888	0.0373444	0.0871369	0.0539419
GLI1	ENST00000228682.7	full-splice_match	1	0	0	3972	3318	444	210	0.5929	0.591498	0.676404	0.438095	0.0162896	0.0352941	0.0443439	0.0199095	0.0461538	0.0705882	0.0117647	0.0452489	0.038914	0.081448	0.0633484	0.039819	0.0199095	0.0343891	0.0515837	0.0144796	0.0515837	0.0660633	0.109502	0.0488688	0.126697	0.0986425	0.0280543	0.0904977	0.0162896	0.0180995	0.0253394	0.00904977	0.0253394	0.0705882	0.0904977	0.0461538	0.0425339	0.0452489	0.0570136	0.0262443
ELK3	ENST00000228741.8	full-splice_match	1	0	0	4201	1221	333	2647	0.428469	0.565574	0.601796	0.343408	0.0418719	0.0418719	0.0714286	0.0295567	0.0517241	0.0394089	0.0295567	0.0344828	0.0640394	0.0665025	0.0418719	0.0418719	0.0147783	0.0566502	0.0270936	0.0221675	0.0738916	0.0566502	0.0862069	0.0418719	0.091133	0.0714286	0.0591133	0.091133	0.0320197	0.0418719	0.0394089	0.0221675	0.00492611	0.08867	0.0985222	0.0517241	0.0566502	0.0418719	0.0492611	0.0369458
RAD51AP1	ENST00000228843.13	full-splice_match	1	0	0	2163	1056	50	1057	0.359686	0.414218	0.411765	0.302744	0.119658	0.0541311	0.116809	0.0655271	0.042735	0.048433	0.00854701	0.0569801	0.119658	0.0598291	0.034188	0.0854701	0.031339	0.039886	0.0512821	0.045584	0.0569801	0.042735	0.0968661	0.022792	0.0712251	0.019943	0.00854701	0.037037	0.00569801	0.00569801	0.011396	0.002849	0.039886	0.045584	0.0541311	0.0541311	0.11396	0.034188	0.037037	0.0655271
AKAP3	ENST00000228850.6	full-splice_match	1	0	0	3334	2559	551	224	0.478704	0.486317	0.449275	0.464286	0.0539906	0.0422535	0.0985915	0.0434272	0.0516432	0.0492958	0.00938967	0.0328638	0.0938967	0.0598592	0.0657277	0.0446009	0.0187793	0.0457746	0.084507	0.0316901	0.0669014	0.0410798	0.0809859	0.0469484	0.0774648	0.036385	0.0152582	0.0598592	0.0105634	0.00704225	0.0199531	0.0140845	0.0293427	0.0539906	0.0809859	0.0422535	0.092723	0.0446009	0.0669014	0.0575117
DUSP16	ENST00000228862.3	full-splice_match	1	1	1	3402	429	632	2341	0.490006	0.441589	0.530806	0.487826	0.0633803	0.0492958	0.0915493	0.0633803	0.056338	0.0140845	0.0140845	0.056338	0.0633803	0.0915493	0.0422535	0.0352113	0.0422535	0.028169	0.056338	0.0774648	0.0774648	0.0211268	0.0774648	0.0633803	0.0633803	0.0211268	0.00704225	0.0211268	0.0211268	0	0.0140845	0	0.00704225	0.0633803	0.0915493	0.0352113	0.084507	0.0211268	0.0422535	0.056338
SCNN1A	ENST00000228916.7	full-splice_match	1	0	0	3149	2007	113	1029	0.573833	0.587238	0.684211	0.535471	0.0164671	0.0523952	0.0329341	0.0224551	0.0568862	0.0688623	0.0164671	0.0508982	0.0374251	0.0613772	0.0613772	0.0284431	0.00748503	0.0374251	0.0494012	0.011976	0.0598802	0.0553892	0.0883234	0.0434132	0.0853293	0.0658683	0.0434132	0.0973054	0.0269461	0.0329341	0.0374251	0.0194611	0.0239521	0.0823353	0.109281	0.0568862	0.0419162	0.0464072	0.0613772	0.0269461
LTBR	ENST00000228918.9	full-splice_match	1	0	0	2134	1305	197	632	0.615745	0.611963	0.757576	0.579114	0.0138249	0.0368664	0.0391705	0.0230415	0.0391705	0.0898618	0.00691244	0.0483871	0.0483871	0.0691244	0.062212	0.0253456	0.0115207	0.0322581	0.0414747	0.016129	0.0414747	0.0691244	0.09447	0.0437788	0.119816	0.0875576	0.0645161	0.0898618	0.0230415	0.0345622	0.0345622	0.0115207	0.0345622	0.0599078	0.133641	0.0276498	0.0506912	0.0437788	0.062212	0.0184332
OAS3	ENST00000228928.12	full-splice_match	1	0	0	6599	3261	57	3281	0.540688	0.595706	0.706897	0.483084	0.0156538	0.0368324	0.0561694	0.0165746	0.0368324	0.0589319	0.0165746	0.0349908	0.0441989	0.0911602	0.072744	0.0313076	0.00276243	0.0451197	0.0423573	0.0110497	0.0515654	0.0377532	0.11326	0.0432781	0.0883978	0.0607735	0.0377532	0.0902394	0.019337	0.0322284	0.0349908	0.0138122	0.0257827	0.053407	0.137201	0.0423573	0.0515654	0.0515654	0.0626151	0.0331492
GTF2H3	ENST00000228955.11	full-splice_match	1	0	0	1472	801	74	597	0.390625	0.42625	0.506667	0.328308	0.0864662	0.0451128	0.0864662	0.075188	0.056391	0.0225564	0.0112782	0.0451128	0.0827068	0.0300752	0.0413534	0.0451128	0.037594	0.056391	0.0526316	0.075188	0.0639098	0.0150376	0.0827068	0.0526316	0.0338346	0.0338346	0.0112782	0.0601504	0.0225564	0.0037594	0.0075188	0.0112782	0.0150376	0.0526316	0.0864662	0.0639098	0.105263	0.0488722	0.0263158	0.0526316
ACRBP	ENST00000229243.7	full-splice_match	1	0	0	1905	1629	66	210	0.555906	0.55344	0.686567	0.533333	0.0239852	0.0424354	0.0645756	0.0276753	0.0479705	0.0516605	0.0258303	0.0516605	0.0756458	0.0756458	0.0793358	0.0405904	0.0166052	0.0258303	0.0424354	0.0129151	0.0516605	0.0608856	0.110701	0.0184502	0.0904059	0.0571956	0.0276753	0.0940959	0.0258303	0.0184502	0.0276753	0.0147601	0.0369004	0.0848708	0.0904059	0.0571956	0.0738007	0.0461255	0.0830258	0.0332103
GNB3	ENST00000229264.8	full-splice_match	1	0	0	1657	1020	139	498	0.582981	0.577036	0.692857	0.564257	0.00884956	0.0294985	0.0442478	0.020649	0.0530973	0.0294985	0.0530973	0.0471976	0.0501475	0.0648968	0.0412979	0.020649	0.00589971	0.0471976	0.0560472	0.0235988	0.0589971	0.0560472	0.0678466	0.0530973	0.0707965	0.0176991	0.020649	0.0737463	0.020649	0.0324484	0.0412979	0.0294985	0.0235988	0.0560472	0.141593	0.0412979	0.0235988	0.0825959	0.0530973	0.0442478
HCFC2	ENST00000229330.9	full-splice_match	1	0	0	5660	2376	30	3254	0.362191	0.434105	0.645161	0.307007	0.079646	0.0518331	0.0720607	0.0670038	0.0707965	0.0391909	0.0139064	0.0417193	0.0556258	0.05689	0.0391909	0.0556258	0.0530973	0.0518331	0.0745891	0.045512	0.079646	0.045512	0.0834387	0.0480405	0.0632111	0.0164349	0.011378	0.0493047	0.011378	0.00632111	0.0189633	0.00632111	0.0353982	0.0290771	0.05689	0.0543616	0.0657396	0.0278129	0.0391909	0.0581542
ZNF76	ENST00000229405.8	full-splice_match	1	1	1	4651	453	501	3697	0.556439	0.573009	0.611554	0.54693	0.0133333	0.0133333	0.0733333	0	0.0733333	0.08	0.0266667	0.02	0.0866667	0.106667	0.08	0.0266667	0.0133333	0.02	0.0666667	0.0133333	0.0333333	0.0666667	0.14	0.0466667	0.0866667	0.0466667	0.0266667	0.0666667	0.00666667	0.02	0.02	0.02	0.02	0.0266667	0.08	0.0666667	0.0533333	0.06	0.0733333	0.0533333
FYN	ENST00000229471.8	full-splice_match	1	0	0	2009	1446	103	460	0.480338	0.496886	0.5	0.423913	0.0582121	0.0540541	0.0790021	0.035343	0.0748441	0.0582121	0.022869	0.0582121	0.0686071	0.0686071	0.0706861	0.037422	0.027027	0.037422	0.0561331	0.04158	0.0706861	0.047817	0.0769231	0.049896	0.0644491	0.047817	0.031185	0.037422	0.027027	0.02079	0.024948	0.012474	0.029106	0.039501	0.0602911	0.0602911	0.0852391	0.0602911	0.0769231	0.039501
RSPH4A	ENST00000229554.10	full-splice_match	1	0	0	2840	2148	145	547	0.427465	0.455054	0.452055	0.312614	0.0657343	0.0391608	0.11049	0.0713287	0.0587413	0.0545455	0.0167832	0.0181818	0.102098	0.0587413	0.0657343	0.0503497	0.041958	0.041958	0.0615385	0.0587413	0.0741259	0.0377622	0.0755245	0.0391608	0.0699301	0.0363636	0.0153846	0.0531469	0.013986	0.0181818	0.0125874	0.00979021	0.0293706	0.0461538	0.0531469	0.041958	0.128671	0.041958	0.0643357	0.0503497
NCOA7	ENST00000229634.13	full-splice_match	1	0	0	2998	2481	258	259	0.447965	0.443952	0.490347	0.444015	0.0811138	0.0520581	0.0920097	0.0556901	0.0581114	0.0338983	0.0181598	0.0605327	0.0956416	0.0496368	0.0532688	0.0423729	0.0435835	0.0435835	0.0605327	0.0496368	0.0556901	0.0411622	0.0714286	0.059322	0.0569007	0.0290557	0.00968523	0.0520581	0.0181598	0.00968523	0.0145278	0.00363196	0.0375303	0.0423729	0.059322	0.0581114	0.105327	0.0460048	0.0532688	0.0496368
ULBP1	ENST00000229708.4	full-splice_match	1	0	0	3211	732	107	2372	0.430396	0.508892	0.638889	0.396712	0.0452675	0.0617284	0.0946502	0.0246914	0.0740741	0.0576132	0.00823045	0.0493827	0.0740741	0.0411523	0.0452675	0.0411523	0.00411523	0.0288066	0.0658436	0.0329218	0.0740741	0.0699588	0.0740741	0.0493827	0.0781893	0.0534979	0.0164609	0.0864198	0.00411523	0.0123457	0.0123457	0.00823045	0.0205761	0.0493827	0.0946502	0.0823045	0.0823045	0.0493827	0.037037	0.0493827
SLC44A4	ENST00000229729.11	full-splice_match	1	0	0	2585	2130	17	438	0.54971	0.55566	0.611111	0.518265	0.0253879	0.0380818	0.0493653	0.0211566	0.0507757	0.0507757	0.0211566	0.0380818	0.0423131	0.045134	0.0380818	0.0282087	0.0155148	0.0620592	0.0409027	0.0239774	0.0521862	0.0296192	0.0606488	0.0719323	0.0705219	0.0578279	0.0239774	0.105783	0.0126939	0.0211566	0.0380818	0.0239774	0.0394922	0.0691114	0.12835	0.0550071	0.0423131	0.0394922	0.0409027	0.0282087
TULP1	ENST00000229771.11	full-splice_match	1	0	0	2120	1626	38	456	0.629245	0.619692	0.564103	0.66886	0.0462107	0.0369686	0.110906	0.0166359	0.0295749	0.0591497	0.0462107	0.0147874	0.0942699	0.0665434	0.131238	0.0184843	0.00739372	0.0277264	0.0240296	0.00739372	0.0554529	0.0295749	0.0702403	0.025878	0.0702403	0.0961183	0.0665434	0.077634	0.0443623	0.0443623	0.0665434	0.0184843	0.0221811	0.0406654	0.077634	0.0240296	0.101664	0.0665434	0.114603	0.0166359
MAPK14	ENST00000229794.9	full-splice_match	1	0	0	4222	1080	350	2792	0.45855	0.466172	0.746439	0.419413	0.0389972	0.0473538	0.0640669	0.0417827	0.0612813	0.0584958	0.0167131	0.0389972	0.0835655	0.0417827	0.0362117	0.0473538	0.0250696	0.0417827	0.086351	0.0557103	0.0334262	0.0278552	0.091922	0.0557103	0.0557103	0.0222841	0.0167131	0.0584958	0.0250696	0.00278552	0.0139276	0.0167131	0.0362117	0.0501393	0.086351	0.0445682	0.097493	0.0584958	0.0473538	0.0696379
MAPK14	ENST00000229795.7	full-splice_match	1	0	0	4319	1080	447	2792	0.462607	0.46988	0.714286	0.419413	0.0362117	0.0529248	0.0584958	0.0389972	0.0696379	0.0612813	0.0167131	0.0362117	0.0779944	0.0445682	0.0417827	0.0417827	0.0250696	0.0389972	0.0947075	0.0584958	0.0362117	0.0306407	0.097493	0.0584958	0.0612813	0.0250696	0.0194986	0.0557103	0.0250696	0.00557103	0.0139276	0.0167131	0.0362117	0.0417827	0.0835655	0.0473538	0.0891365	0.0584958	0.0445682	0.0724234
STK38	ENST00000229812.8	full-splice_match	1	0	0	3585	1395	295	1895	0.455788	0.431133	0.702703	0.435356	0.0840517	0.0560345	0.0991379	0.049569	0.0883621	0.0409483	0.012931	0.0517241	0.107759	0.049569	0.0625	0.0431034	0.0431034	0.0387931	0.0603448	0.0431034	0.0668103	0.0366379	0.0668103	0.0603448	0.0452586	0.00862069	0.00646552	0.0538793	0.00646552	0.00646552	0.0150862	0.0150862	0.0301724	0.0474138	0.0581897	0.0560345	0.109914	0.0732759	0.075431	0.0452586
MCM3	ENST00000229854.12	full-splice_match	1	0	0	3095	2454	64	577	0.516963	0.533632	0.446154	0.454073	0.0232558	0.0195838	0.0856793	0.0269278	0.0416157	0.0526316	0.0195838	0.0330477	0.0832313	0.0624235	0.0771114	0.0428397	0.0146879	0.0526316	0.0758874	0.0257038	0.0465116	0.0403917	0.0905753	0.0575275	0.0807834	0.0330477	0.0293758	0.0648715	0.0244798	0.0195838	0.0281518	0.0171359	0.0281518	0.0538556	0.0795594	0.0477356	0.0709914	0.0636475	0.0783354	0.0587515
RNF8	ENST00000229866.10	full-splice_match	1	1	1	2124	294	150	1680	0.474105	0.546075	0.609272	0.449405	0.0309278	0.0309278	0.0515464	0.0412371	0.0618557	0.0309278	0.0103093	0.0309278	0.0824742	0.0618557	0.0721649	0.0103093	0.0103093	0.0309278	0.0515464	0.0515464	0.0618557	0.0309278	0.0618557	0.0103093	0.0309278	0.0206186	0.0515464	0.0515464	0.0309278	0.0206186	0.0618557	0.0103093	0	0.0103093	0.123711	0.0412371	0.0618557	0.0515464	0.103093	0.0721649
GPLD1	ENST00000230036.2	full-splice_match	1	0	0	5790	2520	67	3203	0.447668	0.500992	0.588235	0.402747	0.0417163	0.0381406	0.0488677	0.0417163	0.0464839	0.0512515	0.0250298	0.0500596	0.0524434	0.0500596	0.0584029	0.0250298	0.022646	0.034565	0.0655542	0.0441001	0.0488677	0.0512515	0.057211	0.0500596	0.057211	0.0369487	0.0262217	0.0667461	0.0178784	0.0107271	0.0250298	0.0309893	0.0309893	0.0464839	0.0870083	0.0607867	0.0584029	0.0524434	0.0607867	0.0417163
B3GAT2	ENST00000230053.11	full-splice_match	1	0	0	6587	969	631	4987	0.433581	0.627066	0.713608	0.360537	0.0310559	0.0434783	0.0496894	0.0186335	0.0496894	0.052795	0.0496894	0.0310559	0.0279503	0.0838509	0.0403727	0.0310559	0.00931677	0.0372671	0.015528	0.015528	0.052795	0.0745342	0.0869565	0.0248447	0.0807453	0.0621118	0.0838509	0.0559006	0.0341615	0.114907	0.068323	0.0279503	0.0310559	0.0496894	0.0931677	0.0341615	0.0372671	0.0434783	0.0403727	0.0217391
ZBTB24	ENST00000230122.4	full-splice_match	1	0	0	5501	2091	150	3260	0.415379	0.477033	0.721854	0.361656	0.0732759	0.0445402	0.0775862	0.0603448	0.0804598	0.0344828	0.0100575	0.058908	0.0977011	0.0862069	0.0675287	0.0431034	0.0258621	0.0531609	0.0402299	0.0402299	0.0747126	0.0617816	0.122126	0.0517241	0.0847701	0.0244253	0.0158046	0.0387931	0.012931	0.0143678	0.0158046	0.0100575	0.0215517	0.0474138	0.0689655	0.0545977	0.079023	0.0359195	0.079023	0.0301724
UNC93A	ENST00000230256.8	full-splice_match	1	0	0	2111	1371	175	565	0.503079	0.560584	0.397727	0.39646	0.0241228	0.0285088	0.0460526	0.0153509	0.0526316	0.0526316	0.0328947	0.0285088	0.0526316	0.0548246	0.0438596	0.0307018	0.0197368	0.0328947	0.0460526	0.0241228	0.0438596	0.0592105	0.0855263	0.0504386	0.0745614	0.0372807	0.0219298	0.0921053	0.0153509	0.0285088	0.0241228	0.0482456	0.0263158	0.0657895	0.118421	0.0482456	0.0394737	0.0350877	0.0504386	0.0350877
C6orf118	ENST00000230301.9	full-splice_match	1	0	0	1822	1407	19	396	0.474753	0.523471	0.6	0.295455	0.0576923	0.0384615	0.100427	0.0448718	0.0470085	0.0448718	0.0277778	0.0491453	0.0982906	0.0641026	0.102564	0.0320513	0.0299145	0.0320513	0.0363248	0.0299145	0.0363248	0.0470085	0.100427	0.0213675	0.0641026	0.0448718	0.0299145	0.0534188	0.0192308	0.0277778	0.0363248	0.0128205	0.017094	0.0534188	0.0897436	0.0384615	0.123932	0.042735	0.0876068	0.0448718
GUCA1B	ENST00000230361.4	full-splice_match	1	0	0	2270	600	136	1534	0.532599	0.550918	0.576642	0.521512	0.0150754	0.0201005	0.080402	0.0301508	0.0703518	0.0251256	0.0201005	0.0201005	0.0703518	0.0954774	0.0854271	0.0552764	0.0100503	0.0301508	0.0954774	0.0150754	0.0552764	0.0301508	0.080402	0.040201	0.0452261	0.0301508	0.0251256	0.040201	0.0452261	0.0150754	0.0301508	0.0201005	0.0150754	0.0552764	0.0904523	0.0301508	0.0653266	0.0502513	0.130653	0.0653266
PRPH2	ENST00000230381.7	full-splice_match	1	0	0	3001	1038	263	1700	0.522159	0.559306	0.606061	0.486471	0.0144928	0.0463768	0.0753623	0.0231884	0.0347826	0.0521739	0.0347826	0.0376812	0.0811594	0.0608696	0.0550725	0.0318841	0.0057971	0.0550725	0.0405797	0.0231884	0.0724638	0.0231884	0.0724638	0.0492754	0.0637681	0.0347826	0.0202899	0.0666667	0.0318841	0.0318841	0.0347826	0.0231884	0.0376812	0.057971	0.130435	0.0318841	0.0695652	0.0492754	0.057971	0.0405797
PPP2R5D	ENST00000230402.10	full-splice_match	1	1	1	2958	333	78	2547	0.550372	0.605422	0.797468	0.535532	0.0454545	0.0363636	0.118182	0.0363636	0.0272727	0.0272727	0.0272727	0.0363636	0.0545455	0.2	0.0909091	0.0181818	0.0181818	0.0272727	0.0181818	0.00909091	0.127273	0.0454545	0.154545	0.00909091	0.136364	0.136364	0.0363636	0.0454545	0.0181818	0.0454545	0.0272727	0.0181818	0.0181818	0.0636364	0.0363636	0.0272727	0.0545455	0.0272727	0.0727273	0.0181818
VEGFA	ENST00000230480.10	full-splice_match	1	0	0	993	489	128	376	0.543807	0.516393	0.751938	0.507979	0.0555556	0.037037	0.0802469	0.0432099	0.0679012	0.037037	0.0308642	0.0246914	0.111111	0.0679012	0.0679012	0.0432099	0.0123457	0.0802469	0.0802469	0.0123457	0.0925926	0.0432099	0.0864198	0.0617284	0.0617284	0.0308642	0.0123457	0.0617284	0.0493827	0.0185185	0.0246914	0.0185185	0.0185185	0.0185185	0.0679012	0.037037	0.0555556	0.0493827	0.111111	0.0679012
TTK	ENST00000230510.7	full-splice_match	1	0	0	3477	2568	581	328	0.397181	0.368913	0.573883	0.304878	0.116959	0.0783626	0.0830409	0.097076	0.0549708	0.0432749	0.00935673	0.051462	0.0935673	0.0409357	0.0280702	0.0584795	0.0573099	0.0444444	0.0678363	0.0830409	0.0842105	0.0292398	0.0736842	0.0444444	0.0690058	0.0152047	0.0116959	0.0280702	0.00701754	0.00350877	0.0128655	0.00350877	0.0409357	0.019883	0.0421053	0.0491228	0.0982456	0.0210526	0.0421053	0.0643275
TENT4A	ENST00000230859.8	full-splice_match	1	0	0	5030	2376	552	2102	0.568787	0.597474	0.855335	0.46099	0.0353982	0.0404551	0.0493047	0.0303413	0.0518331	0.0505689	0.0252845	0.0278129	0.0518331	0.0733249	0.0480405	0.0316056	0.0176991	0.0303413	0.0417193	0.0265487	0.0467762	0.0429836	0.0872314	0.0379267	0.0657396	0.0594185	0.0834387	0.0632111	0.0202276	0.0707965	0.0834387	0.0353982	0.0240202	0.045512	0.0644753	0.0480405	0.0594185	0.0404551	0.0493047	0.0252845
GHR	ENST00000230882.9	full-splice_match	1	0	0	4899	1914	528	2457	0.425597	0.44276	0.703214	0.352462	0.0643642	0.0502355	0.0753532	0.0612245	0.0706436	0.0486656	0.00627943	0.0580848	0.0722135	0.0549451	0.0549451	0.0502355	0.0361068	0.0486656	0.0863422	0.0533752	0.0722135	0.0486656	0.0863422	0.0565149	0.0784929	0.0298273	0.00627943	0.0549451	0.0141287	0.00156986	0.00313972	0.00784929	0.0392465	0.0455259	0.0722135	0.0486656	0.0769231	0.0486656	0.0533752	0.0596546
LOX	ENST00000231004.5	full-splice_match	1	0	0	5076	1251	274	3551	0.395784	0.588	0.592727	0.31287	0.0216346	0.0480769	0.0336538	0.0120192	0.0769231	0.0721154	0.0288462	0.0432692	0.0552885	0.0528846	0.0384615	0.0408654	0.0216346	0.03125	0.0504808	0.0288462	0.0504808	0.0528846	0.108173	0.0360577	0.0745192	0.0552885	0.0817308	0.0721154	0.03125	0.0889423	0.0528846	0.0216346	0.0432692	0.0408654	0.0961538	0.0240385	0.0336538	0.0576923	0.0360577	0.0504808
CDH9	ENST00000231021.9	full-splice_match	1	0	0	3082	2367	173	542	0.391304	0.41716	0.408046	0.273063	0.0748731	0.0482234	0.072335	0.069797	0.0799492	0.0469543	0.0203046	0.0469543	0.0837563	0.035533	0.0431472	0.0418782	0.069797	0.0469543	0.0736041	0.0748731	0.069797	0.0406091	0.0748731	0.0583756	0.0507614	0.0164975	0.0164975	0.0444162	0.0203046	0.0101523	0.0203046	0.0139594	0.0266497	0.035533	0.0621827	0.034264	0.0761421	0.0545685	0.035533	0.0786802
PCDHB3	ENST00000231130.3	full-splice_match	1	0	0	3355	2388	177	790	0.496274	0.556347	0.522472	0.308861	0.0377358	0.0528302	0.0389937	0.0389937	0.0540881	0.0528302	0.0327044	0.045283	0.0490566	0.0465409	0.0666667	0.036478	0.0201258	0.0289308	0.0301887	0.0339623	0.0578616	0.0427673	0.0767296	0.0301887	0.0616352	0.0528302	0.0515723	0.0540881	0.0352201	0.0490566	0.0591195	0.0238994	0.0314465	0.0603774	0.090566	0.0402516	0.0553459	0.0553459	0.0654088	0.0238994
PCDHB5	ENST00000231134.8	full-splice_match	1	0	0	3410	2385	229	796	0.496774	0.566275	0.465217	0.297739	0.0415617	0.0528967	0.0289673	0.0365239	0.0579345	0.0528967	0.0352645	0.0428212	0.0541562	0.0566751	0.0566751	0.0239295	0.0251889	0.0201511	0.0352645	0.0327456	0.0491184	0.0554156	0.0831234	0.0314861	0.0730479	0.059194	0.0528967	0.059194	0.0352645	0.059194	0.0579345	0.0188917	0.0327456	0.0566751	0.0831234	0.0352645	0.0503778	0.0528967	0.0604534	0.02267
PCDHB7	ENST00000231137.6	full-splice_match	1	0	0	3740	2379	192	1169	0.475401	0.559294	0.42487	0.313088	0.0366162	0.0555556	0.0265152	0.0416667	0.0467172	0.0631313	0.0315657	0.0378788	0.0593434	0.0416667	0.0530303	0.0290404	0.0164141	0.0340909	0.0290404	0.040404	0.0542929	0.0429293	0.0757576	0.0290404	0.0681818	0.0593434	0.0580808	0.0631313	0.0340909	0.0517677	0.0555556	0.0315657	0.0340909	0.0542929	0.0820707	0.0391414	0.0517677	0.0505051	0.0656566	0.0252525
PCDHB15	ENST00000231173.6	full-splice_match	1	0	0	3971	2361	184	1426	0.479224	0.561864	0.508108	0.33871	0.0356234	0.0445293	0.0356234	0.0368957	0.0458015	0.0559796	0.0318066	0.0381679	0.0559796	0.0610687	0.062341	0.0330789	0.019084	0.0216285	0.0305344	0.0356234	0.0470738	0.0368957	0.0788804	0.0216285	0.0559796	0.0610687	0.0534351	0.0648855	0.0407125	0.0496183	0.0508906	0.019084	0.0381679	0.0610687	0.0941476	0.043257	0.0458015	0.062341	0.0801527	0.0318066
C1QTNF3	ENST00000231338.7	full-splice_match	1	0	0	1959	738	88	1133	0.425727	0.51289	0.58427	0.356575	0.044898	0.0530612	0.0612245	0.0408163	0.0489796	0.0612245	0.00408163	0.0408163	0.044898	0.0612245	0.077551	0.0326531	0.00816327	0.0285714	0.106122	0.0408163	0.0816327	0.0408163	0.0897959	0.0693878	0.0816327	0.0367347	0.0122449	0.0489796	0.0163265	0.00816327	0.0163265	0	0.0326531	0.0367347	0.0571429	0.0693878	0.0653061	0.0326531	0.0612245	0.044898
IRX4	ENST00000231357.7	full-splice_match	1	0	0	2394	1557	278	559	0.66416	0.697943	0.677419	0.563506	0.00579151	0.030888	0.0482625	0	0.0173745	0.0579151	0.0501931	0.034749	0.042471	0.0637066	0.0810811	0.015444	0.0019305	0.0135135	0.027027	0.0019305	0.0444015	0.0540541	0.0656371	0.015444	0.0810811	0.0868726	0.106178	0.0810811	0.0328185	0.129344	0.0907336	0.0289575	0.030888	0.0675676	0.100386	0.0250965	0.030888	0.0482625	0.0830116	0.019305
LNPEP	ENST00000231368.10	full-splice_match	1	0	0	12134	3075	76	8983	0.375391	0.417697	0.688312	0.358232	0.0693359	0.0546875	0.0742187	0.0605469	0.0517578	0.0429688	0.00292969	0.0576172	0.0732422	0.0488281	0.0419922	0.0429688	0.0419922	0.0498047	0.0830078	0.0585938	0.0693359	0.0341797	0.0634766	0.0595703	0.0390625	0.0205078	0.0107422	0.0566406	0.0107422	0.00292969	0.00976562	0.00585938	0.0380859	0.0283203	0.0673828	0.0742187	0.0888672	0.0283203	0.0478516	0.0605469
ST8SIA4	ENST00000231461.10	full-splice_match	1	0	0	6321	1077	327	4917	0.369087	0.409851	0.615854	0.343706	0.075419	0.0335196	0.0810056	0.0921788	0.0670391	0.0223464	0.0111732	0.0446927	0.0893855	0.0418994	0.0558659	0.0446927	0.047486	0.0446927	0.0726257	0.0726257	0.0642458	0.0391061	0.0558659	0.0642458	0.0335196	0.0111732	0.00558659	0.0502793	0.0139665	0.0111732	0.0111732	0.00837989	0.0335196	0.0335196	0.0670391	0.0558659	0.0837989	0.0446927	0.0614525	0.0502793
NUP155	ENST00000231498.8	full-splice_match	1	0	0	8068	4173	129	3766	0.416336	0.424017	0.538462	0.403611	0.0611511	0.0402878	0.0604317	0.0690647	0.0561151	0.0330935	0.00791367	0.0496403	0.0741007	0.0453237	0.0431655	0.0539568	0.0460432	0.0431655	0.0654676	0.0748201	0.0611511	0.0338129	0.0784173	0.0532374	0.0517986	0.0172662	0.0151079	0.0482014	0.0136691	0.00647482	0.0100719	0.0100719	0.0330935	0.0460432	0.0654676	0.0705036	0.0690647	0.0352518	0.0453237	0.0597122
TRIM23	ENST00000231524.14	full-splice_match	1	0	0	3863	1722	59	2082	0.360342	0.43405	0.6	0.292507	0.0663176	0.052356	0.0663176	0.052356	0.0593368	0.0244328	0.0104712	0.0541012	0.0767888	0.0593368	0.04363	0.0488656	0.026178	0.0296684	0.0663176	0.0837696	0.0506108	0.0383944	0.0837696	0.0558464	0.0296684	0.0122164	0.0157068	0.026178	0.0157068	0.0017452	0.0157068	0.0191972	0.0331588	0.0541012	0.0645724	0.0296684	0.0942408	0.0296684	0.0471204	0.0541012
SLC7A14	ENST00000231706.6	full-splice_match	1	0	0	10140	2313	317	7510	0.427318	0.534602	0.581761	0.38775	0.0246753	0.0337662	0.0428571	0.0285714	0.0506494	0.0597403	0.0246753	0.0298701	0.0506494	0.0558442	0.0441558	0.0311688	0.0168831	0.0597403	0.0662338	0.0350649	0.0519481	0.0597403	0.0701299	0.0805195	0.0779221	0.0324675	0.0155844	0.0727273	0.0142857	0.0181818	0.0311688	0.0194805	0.0298701	0.0571429	0.102597	0.0480519	0.0480519	0.0415584	0.0571429	0.0402597
SEMA3G	ENST00000231721.7	full-splice_match	1	0	0	4993	2346	76	2571	0.58602	0.639659	0.701299	0.533644	0.0102433	0.0166453	0.0371319	0.0115237	0.0307298	0.0691421	0.0268886	0.028169	0.0460948	0.0678617	0.0704225	0.0268886	0.00512164	0.0179257	0.0448143	0.00512164	0.0396927	0.0601793	0.0870679	0.0294494	0.0909091	0.0704225	0.0640205	0.0960307	0.0268886	0.0332907	0.0601793	0.0204866	0.021767	0.0627401	0.116517	0.0396927	0.0243278	0.049936	0.0755442	0.028169
ZMYND10	ENST00000231749.8	full-splice_match	1	0	0	1774	1320	153	301	0.600902	0.589083	0.662338	0.621262	0.0182232	0.0387244	0.0728929	0.00911162	0.0501139	0.047836	0.0136674	0.0455581	0.0728929	0.107062	0.0774487	0.0432802	0.00455581	0.0250569	0.0341686	0.0136674	0.0523918	0.047836	0.125285	0.0364465	0.070615	0.0660592	0.0182232	0.0774487	0.0205011	0.0250569	0.022779	0.00455581	0.0296128	0.0410023	0.134396	0.0341686	0.0615034	0.0455581	0.0933941	0.0250569
EHHADH	ENST00000231887.8	full-splice_match	1	0	0	3801	2169	27	1605	0.417522	0.476015	0.535714	0.336449	0.0540166	0.0443213	0.0706371	0.0484765	0.0415512	0.034626	0.0138504	0.0526316	0.0747922	0.0609418	0.0734072	0.034626	0.033241	0.0401662	0.0443213	0.0623269	0.065097	0.0373961	0.0803324	0.0429363	0.0581717	0.0457064	0.0193906	0.0498615	0.0110803	0.0152355	0.0152355	0.0152355	0.033241	0.0415512	0.0706371	0.0637119	0.0747922	0.031856	0.0526316	0.0498615
BCL6	ENST00000232014.8	full-splice_match	1	0	0	2710	2118	529	63	0.547232	0.570146	0.464151	0.47619	0.0269504	0.0468085	0.0510638	0.0283688	0.0595745	0.070922	0.0141844	0.035461	0.0666667	0.0808511	0.0397163	0.0453901	0.012766	0.0397163	0.0524823	0.0184397	0.0680851	0.0666667	0.0907801	0.0468085	0.116312	0.0751773	0.0425532	0.104965	0.0184397	0.022695	0.0368794	0.0198582	0.0212766	0.0652482	0.093617	0.0368794	0.048227	0.0340426	0.0808511	0.0312057
PFKFB4	ENST00000232375.8	full-splice_match	1	0	0	3499	1407	26	2066	0.562732	0.55761	0.740741	0.563892	0.0192308	0.042735	0.0576923	0.0320513	0.0512821	0.0662393	0.0384615	0.0320513	0.0641026	0.042735	0.0641026	0.0448718	0.0213675	0.0512821	0.0534188	0.0235043	0.0598291	0.0384615	0.0683761	0.0534188	0.0705128	0.0448718	0.0363248	0.0854701	0.0277778	0.0299145	0.0470085	0.025641	0.0384615	0.0470085	0.0982906	0.017094	0.0641026	0.0726496	0.0790598	0.0384615
ECT2	ENST00000232458.9	full-splice_match	1	0	0	4087	2649	198	1240	0.368241	0.389728	0.507538	0.3	0.0929705	0.0442177	0.114512	0.0589569	0.0510204	0.0340136	0.0113379	0.0487528	0.0997732	0.0589569	0.0442177	0.0544218	0.037415	0.0340136	0.0680272	0.0827664	0.0725624	0.0328798	0.0578231	0.047619	0.0487528	0.0226757	0.00907029	0.0408163	0.00907029	0.00566893	0.00793651	0.00907029	0.0362812	0.0408163	0.0272109	0.0793651	0.0873016	0.0362812	0.0555556	0.0600907
C3orf14	ENST00000232519.9	full-splice_match	1	0	0	690	384	46	260	0.372464	0.383812	0.595745	0.315385	0.125984	0.0472441	0.0944882	0.0944882	0.0629921	0.0393701	0.00787402	0.0708661	0.11811	0.0393701	0.0551181	0.0393701	0.0472441	0.0472441	0.0472441	0.0472441	0.0787402	0.0629921	0.0708661	0.0393701	0.0551181	0.015748	0	0.0393701	0.00787402	0.00787402	0.00787402	0.00787402	0.015748	0.0393701	0.0393701	0.0866142	0.11811	0.0393701	0.0472441	0.0314961
ZBTB47	ENST00000232974.11	full-splice_match	1	0	0	5494	2241	268	2985	0.604114	0.633036	0.605948	0.582245	0.00536193	0.0308311	0.0857909	0.00536193	0.0549598	0.0455764	0.038874	0.0308311	0.0723861	0.0951743	0.105898	0.0281501	0.00268097	0.0227882	0.0348525	0.00536193	0.0563003	0.075067	0.0951743	0.0402145	0.0965147	0.0697051	0.0549598	0.0536193	0.0294906	0.0509383	0.0495979	0.0254692	0.0147453	0.0335121	0.0938338	0.0321716	0.0616622	0.041555	0.117962	0.0174263
NKTR	ENST00000232978.13	full-splice_match	1	0	0	7265	4386	116	2763	0.414178	0.424401	0.666667	0.38726	0.117043	0.0499658	0.120465	0.0540726	0.0629706	0.0403833	0.0109514	0.036961	0.108145	0.0602327	0.0602327	0.0780287	0.0431211	0.0588638	0.0520192	0.0383299	0.0704997	0.0451745	0.0889802	0.0499658	0.0588638	0.0164271	0.0143737	0.0376454	0.0212183	0.00616016	0.0136893	0.00889802	0.0246407	0.0424367	0.0451745	0.0410678	0.110198	0.0321697	0.0684463	0.0616016
NEK4	ENST00000233027.10	full-splice_match	1	0	0	6053	2523	194	3336	0.433339	0.475416	0.738462	0.383693	0.0761905	0.05	0.0833333	0.05	0.0607143	0.0404762	0.00952381	0.0333333	0.0761905	0.0666667	0.0785714	0.0547619	0.022619	0.0428571	0.0571429	0.0452381	0.0678571	0.0357143	0.0904762	0.0428571	0.0583333	0.0369048	0.0142857	0.0607143	0.0154762	0.0107143	0.0166667	0.0107143	0.0309524	0.047619	0.072619	0.0440476	0.0916667	0.0297619	0.0809524	0.047619
CPS1	ENST00000233072.10	full-splice_match	1	0	0	5760	4500	135	1125	0.438194	0.462103	0.323529	0.356444	0.0560374	0.0433622	0.0773849	0.0593729	0.0580387	0.0413609	0.00867245	0.0473649	0.0767178	0.0386925	0.0633756	0.0400267	0.0226818	0.0440294	0.0767178	0.0633756	0.0733823	0.0406938	0.0680454	0.0560374	0.072048	0.0320213	0.0126751	0.0460307	0.00867245	0.00867245	0.0113409	0.00800534	0.036024	0.0373582	0.0760507	0.0426951	0.0807205	0.0393596	0.0500334	0.066044
HEATR5B	ENST00000233099.6	full-splice_match	1	0	0	6937	6213	126	598	0.433473	0.44414	0.566929	0.294314	0.0599034	0.0439614	0.0657005	0.0560386	0.0555556	0.0342995	0.010628	0.0492754	0.0589372	0.0652174	0.0342995	0.0565217	0.0352657	0.0391304	0.0671498	0.0531401	0.0574879	0.0362319	0.0758454	0.0550725	0.057971	0.021256	0.0111111	0.042029	0.0202899	0.0101449	0.010628	0.0154589	0.0352657	0.0434783	0.0724638	0.0714976	0.0710145	0.0357488	0.0391304	0.0444444
NCK2	ENST00000233154.9	full-splice_match	1	0	0	2666	1140	427	1099	0.57952	0.627744	0.649533	0.502275	0.0158311	0.0448549	0.0686016	0.0131926	0.0448549	0.0501319	0.0686016	0.0343008	0.055409	0.0791557	0.0712401	0.0343008	0.00527704	0.0131926	0.0343008	0.0105541	0.0580475	0.0422164	0.0817942	0.0263852	0.0659631	0.060686	0.0448549	0.0659631	0.0501319	0.0659631	0.0738786	0.0501319	0.0369393	0.0527704	0.0501319	0.0316623	0.0633245	0.0686016	0.0844327	0.0158311
TFPI	ENST00000233156.9	full-splice_match	1	0	0	3859	912	238	2709	0.346722	0.388584	0.364017	0.331118	0.0891089	0.0561056	0.105611	0.108911	0.0759076	0.0165017	0.00990099	0.0330033	0.0990099	0.0231023	0.0429043	0.0363036	0.049505	0.0330033	0.105611	0.0891089	0.0957096	0.0330033	0.0594059	0.0462046	0.049505	0.0264026	0.00990099	0.029703	0.0165017	0.00660066	0.00990099	0.00660066	0.00990099	0.0264026	0.049505	0.0330033	0.132013	0.019802	0.0363036	0.0627063
APOB	ENST00000233242.5	full-splice_match	1	0	0	14121	13689	128	304	0.435167	0.433445	0.75969	0.375	0.0736519	0.0565541	0.0819816	0.0668566	0.062911	0.0460324	0.0107409	0.0541429	0.0718983	0.0532661	0.0447172	0.0510741	0.0377028	0.0493205	0.0587462	0.065103	0.08242	0.0458132	0.0723367	0.0558965	0.0729943	0.0252082	0.0127137	0.0541429	0.0124945	0.00942569	0.00789128	0.00942569	0.0357299	0.0477861	0.0690487	0.058527	0.081324	0.0359491	0.04669	0.0512933
TTL	ENST00000233336.7	full-splice_match	1	0	0	14267	1131	189	12947	0.424756	0.492035	0.873684	0.412296	0.0425532	0.0531915	0.0824468	0.0478723	0.0505319	0.0531915	0.018617	0.037234	0.0824468	0.0691489	0.0531915	0.0452128	0.0292553	0.0585106	0.0425532	0.0425532	0.0851064	0.0345745	0.0797872	0.0585106	0.0771277	0.0345745	0.0159574	0.0585106	0.018617	0.0159574	0.0292553	0.0159574	0.0265957	0.0585106	0.0771277	0.0638298	0.0771277	0.037234	0.0691489	0.0345745
MPV17	ENST00000233545.6	full-splice_match	1	0	0	998	528	47	423	0.528056	0.56926	0.645833	0.463357	0.0171429	0.0342857	0.0342857	0.0114286	0.0571429	0.0514286	0	0.0685714	0.0228571	0.04	0.0742857	0.0171429	0.00571429	0.0514286	0.0457143	0.0171429	0.04	0.0628571	0.0742857	0.0342857	0.0628571	0.0628571	0.0285714	0.0857143	0	0.00571429	0.04	0.0171429	0.04	0.04	0.154286	0.04	0.0342857	0.0342857	0.0171429	0.04
NRBP1	ENST00000233557.7	full-splice_match	1	0	0	2887	1605	832	450	0.529616	0.504988	0.537815	0.602222	0.0299625	0.0486891	0.0749064	0.0411985	0.0730337	0.0636704	0.0093633	0.0430712	0.0973783	0.0524345	0.0617978	0.0599251	0.0168539	0.0505618	0.0430712	0.0374532	0.0599251	0.0543071	0.0992509	0.0599251	0.0692884	0.0337079	0.0131086	0.0674157	0.0093633	0.0149813	0.0168539	0.0093633	0.0224719	0.0580524	0.101124	0.0355805	0.0917603	0.0599251	0.088015	0.0318352
TLX2	ENST00000233638.8	full-splice_match	1	0	0	2171	852	357	962	0.654537	0.709753	0.72905	0.577963	0.0141343	0.0282686	0.0282686	0.00706714	0.0282686	0.0636042	0.0424028	0.0106007	0.0282686	0.0530035	0.0530035	0.024735	0.00706714	0.0212014	0.0176678	0	0.0353357	0.0565371	0.0636042	0.0176678	0.0600707	0.0671378	0.116608	0.0918728	0.0318021	0.127208	0.127208	0.024735	0.0141343	0.0706714	0.0989399	0.0353357	0.0282686	0.0424028	0.0530035	0.0212014
GGCX	ENST00000233838.9	full-splice_match	1	0	0	7556	2274	65	5217	0.463208	0.528377	0.636364	0.432624	0.0303831	0.0369881	0.0462351	0.0277411	0.0422721	0.0449141	0.014531	0.0581242	0.0501982	0.0620872	0.0475561	0.0264201	0.0224571	0.0330251	0.0554822	0.0356671	0.0409511	0.0449141	0.0752972	0.0435931	0.0581242	0.0515192	0.0264201	0.0858653	0.014531	0.0211361	0.0211361	0.014531	0.0396301	0.0528402	0.122853	0.0700132	0.0554822	0.0462351	0.0501982	0.0409511
AZU1	ENST00000233997.4	full-splice_match	1	0	0	907	753	10	144	0.674752	0.663564	0.818182	0.722222	0.004	0.04	0.016	0.012	0.016	0.08	0.04	0.024	0.036	0.06	0.052	0.024	0.004	0.024	0.036	0.004	0.036	0.044	0.096	0.024	0.088	0.092	0.092	0.08	0.048	0.04	0.072	0.056	0.008	0.044	0.116	0.036	0.032	0.068	0.052	0.028
PASK	ENST00000234040.9	full-splice_match	1	0	0	4540	3969	101	470	0.559031	0.584677	0.598039	0.334043	0.0189107	0.026475	0.0484115	0.0151286	0.0446293	0.0559758	0.0279879	0.0272315	0.0612708	0.0786687	0.0726172	0.03177	0.00983359	0.0370651	0.0370651	0.0181543	0.0332829	0.0468986	0.102118	0.0295008	0.0794251	0.0514372	0.0385779	0.0816944	0.0226929	0.0226929	0.0378215	0.0272315	0.0196672	0.0506808	0.114221	0.0468986	0.0484115	0.0567322	0.0885023	0.0438729
PROC	ENST00000234071.8	full-splice_match	1	0	0	1769	1383	87	299	0.596382	0.620839	0.613636	0.478261	0.0152174	0.0217391	0.0608696	0.0152174	0.05	0.0630435	0.0282609	0.0282609	0.0630435	0.0891304	0.0543478	0.0347826	0.00434783	0.0304348	0.0347826	0.0130435	0.0565217	0.0673913	0.0847826	0.0413043	0.0717391	0.0456522	0.0391304	0.0934783	0.0326087	0.0456522	0.0586957	0.026087	0.0130435	0.0543478	0.115217	0.0413043	0.0413043	0.0652174	0.0869565	0.023913
PLEKHB2	ENST00000234115.10	full-splice_match	1	0	0	4208	663	463	3082	0.469582	0.52719	0.575431	0.441272	0.0272727	0.0318182	0.05	0.0272727	0.0590909	0.05	0.0272727	0.0454545	0.0681818	0.0454545	0.0454545	0.0363636	0.0272727	0.0363636	0.1	0.0409091	0.0409091	0.0545455	0.0863636	0.0590909	0.0590909	0.0227273	0.0318182	0.0454545	0.0409091	0.0227273	0.0409091	0.0272727	0.0454545	0.0409091	0.0772727	0.0272727	0.0590909	0.0590909	0.0409091	0.0590909
GREB1	ENST00000234142.9	full-splice_match	1	0	0	8444	5847	262	2335	0.536712	0.577147	0.498099	0.439829	0.0220739	0.0328542	0.0528747	0.0205339	0.0405544	0.0554415	0.0338809	0.0359343	0.0554415	0.073922	0.0569815	0.0354209	0.011807	0.0395277	0.038501	0.0210472	0.0426078	0.0528747	0.0934292	0.0472279	0.0795688	0.062115	0.0508214	0.0836756	0.0287474	0.0390144	0.0456879	0.025154	0.0174538	0.0672485	0.0949692	0.0533881	0.0513347	0.0528747	0.063655	0.0297741
PRKD3	ENST00000234179.8	full-splice_match	1	0	0	6156	2670	808	2678	0.389214	0.426752	0.419036	0.342793	0.0686164	0.0348706	0.0832396	0.0697413	0.0607424	0.0348706	0.0146232	0.0472441	0.0843645	0.0438695	0.0371204	0.0573678	0.0461192	0.0506187	0.0731159	0.0697413	0.0652418	0.0438695	0.0731159	0.0618673	0.0686164	0.023622	0.0112486	0.0371204	0.00787402	0.0112486	0.00787402	0.0134983	0.0247469	0.0393701	0.0618673	0.0551181	0.0821147	0.0292463	0.0506187	0.0674916
PRTN3	ENST00000234347.10	full-splice_match	1	0	0	987	768	10	209	0.66464	0.659713	0.727273	0.679426	0.00392157	0.0392157	0.0117647	0.00784314	0.0392157	0.0509804	0.054902	0.0431373	0.0196078	0.0823529	0.0470588	0.0156863	0.0117647	0.0352941	0.0235294	0.00392157	0.0313725	0.0862745	0.0980392	0.0352941	0.109804	0.105882	0.0627451	0.0823529	0.0196078	0.054902	0.0745098	0.0588235	0.0117647	0.0588235	0.113725	0.0509804	0.0235294	0.0431373	0.0470588	0.0313725
KISS1R	ENST00000234371.10	full-splice_match	1	0	0	1624	1194	170	260	0.684729	0.725063	0.77193	0.442308	0	0.0277078	0.0125945	0	0.02267	0.0579345	0.0503778	0.0251889	0.00755668	0.0377834	0.0327456	0.0125945	0.00251889	0.0151134	0.0176322	0	0.0302267	0.0503778	0.0554156	0.0251889	0.0604534	0.0831234	0.130982	0.105793	0.0100756	0.178841	0.0780856	0.0453401	0.0251889	0.0554156	0.163728	0.0352645	0.00755668	0.0403023	0.0176322	0.00755668
GRIN3B	ENST00000234389.3	full-splice_match	1	0	0	3281	3129	19	133	0.70253	0.712596	0.6	0.481203	0.00383877	0.0211132	0.0287908	0.000959693	0.0316699	0.059501	0.0508637	0.024952	0.0211132	0.071977	0.0431862	0.0153551	0	0.0182342	0.0163148	0.00479846	0.0326296	0.0729367	0.0681382	0.0278311	0.0738964	0.0911708	0.103647	0.0873321	0.0335893	0.108445	0.106526	0.0326296	0.0115163	0.0575816	0.121881	0.0355086	0.0163148	0.0527831	0.0527831	0.00767754
FAM76A	ENST00000234549.11	full-splice_match	1	0	0	992	936	53	3	0.509073	0.494118	0.777778	0.333333	0.0610932	0.0546624	0.0996785	0.0418006	0.0482315	0.073955	0.0160772	0.0289389	0.109325	0.0643087	0.0675241	0.0643087	0.0289389	0.0192926	0.0450161	0.0546624	0.073955	0.0546624	0.118971	0.0321543	0.0803859	0.0321543	0.00643087	0.0578778	0.0160772	0.0257235	0.0128617	0.00643087	0.0192926	0.0546624	0.0803859	0.0321543	0.106109	0.022508	0.0643087	0.0450161
BCL9	ENST00000234739.8	full-splice_match	1	0	0	6189	4278	651	1260	0.529973	0.565583	0.507669	0.420635	0.0329825	0.0449123	0.042807	0.04	0.0484211	0.0666667	0.00842105	0.0308772	0.0547368	0.0680702	0.0631579	0.0357895	0.0210526	0.0350877	0.0849123	0.0280702	0.0582456	0.0498246	0.122807	0.0575439	0.140351	0.0954386	0.0266667	0.0814035	0.0175439	0.0119298	0.0189474	0.00982456	0.0203509	0.0715789	0.0722807	0.0287719	0.0540351	0.0364912	0.0470175	0.0547368
OPRD1	ENST00000234961.7	full-splice_match	1	0	0	9317	1116	214	7987	0.546421	0.657399	0.827907	0.52335	0	0.0215633	0.0350404	0.0107817	0.0242588	0.0592992	0.0431267	0.0188679	0.0215633	0.0619946	0.0188679	0.0161725	0.00539084	0.0592992	0.0404313	0	0.0512129	0.0485175	0.0512129	0.0673854	0.083558	0.0673854	0.083558	0.083558	0.0296496	0.132075	0.0539084	0.0512129	0.0296496	0.0539084	0.121294	0.0431267	0.0134771	0.0458221	0.0242588	0.0188679
RNF19B	ENST00000235150.5	full-splice_match	1	0	0	2677	2193	124	360	0.562196	0.583942	0.808	0.344444	0.0287671	0.0219178	0.0684932	0.0260274	0.0424658	0.0328767	0.0164384	0.0315068	0.0589041	0.0767123	0.0547945	0.0520548	0.0136986	0.0287671	0.0589041	0.039726	0.0479452	0.039726	0.0876712	0.0520548	0.0657534	0.0643836	0.0821918	0.0547945	0.0383562	0.0616438	0.0534247	0.00958904	0.0232877	0.0452055	0.0767123	0.0246575	0.060274	0.0465753	0.069863	0.0315068
DLGAP3	ENST00000235180.4	full-splice_match	1	0	0	3587	2937	0	650	0.673265	0.668597	0	0.695385	0.00817996	0.0112474	0.0562372	0.00204499	0.0337423	0.0613497	0.0235174	0.0337423	0.0480573	0.0869121	0.0858896	0.0265849	0.0102249	0.0316973	0.0286299	0.00511247	0.0429448	0.0623722	0.095092	0.0357873	0.101227	0.0879346	0.0920245	0.0756646	0.0327198	0.0562372	0.0756646	0.0173824	0.0214724	0.0511247	0.0920245	0.0255624	0.0245399	0.0511247	0.0838446	0.0316973
MAD2L2	ENST00000235310.7	full-splice_match	1	0	0	1860	633	929	298	0.634409	0.55538	0.691398	0.624161	0.0333333	0.0285714	0.0714286	0.0142857	0.047619	0.0571429	0.0428571	0.0333333	0.0809524	0.0619048	0.0380952	0.0333333	0.0190476	0.0571429	0.0619048	0.0190476	0.0428571	0.0714286	0.0761905	0.0619048	0.0857143	0.0380952	0.0428571	0.0619048	0.0285714	0.0428571	0.0285714	0.0428571	0.0142857	0.0619048	0.0904762	0.0285714	0.052381	0.0428571	0.0666667	0.0714286
MFN2	ENST00000235329.10	full-splice_match	1	0	0	4407	2271	190	1946	0.5312	0.547137	0.497382	0.51593	0.026455	0.0304233	0.0687831	0.0238095	0.0529101	0.0542328	0.0171958	0.0383598	0.0661376	0.0740741	0.0753968	0.0436508	0.010582	0.0277778	0.0674603	0.026455	0.0568783	0.0515873	0.0952381	0.0568783	0.0912698	0.0396825	0.026455	0.0582011	0.0185185	0.0185185	0.031746	0.0198413	0.0185185	0.0634921	0.0859788	0.0436508	0.0542328	0.0582011	0.0806878	0.0396825
SLC35D1	ENST00000235345.6	full-splice_match	1	0	0	6193	1065	135	4993	0.418376	0.451128	0.757353	0.402163	0.059322	0.0338983	0.0621469	0.059322	0.0564972	0.0254237	0.0282486	0.0564972	0.0564972	0.0564972	0.0367232	0.0423729	0.0480226	0.0225989	0.0564972	0.0706215	0.0508475	0.0508475	0.059322	0.0282486	0.0338983	0.0169492	0.0169492	0.0508475	0.0141243	0.0169492	0.0169492	0.0282486	0.0254237	0.0536723	0.101695	0.0508475	0.0621469	0.039548	0.0564972	0.0423729
DENND1B	ENST00000235453.8	full-splice_match	1	0	0	2195	1188	278	729	0.403645	0.429655	0.53405	0.311385	0.0734177	0.0531646	0.0582278	0.0582278	0.0658228	0.043038	0.0101266	0.0683544	0.0658228	0.043038	0.0405063	0.0506329	0.0379747	0.043038	0.0607595	0.0632911	0.0607595	0.0405063	0.0708861	0.0455696	0.0582278	0.0303797	0.00759494	0.0556962	0.0126582	0.00506329	0.0101266	0.0126582	0.0303797	0.0405063	0.0810127	0.0582278	0.0734177	0.0329114	0.0531646	0.0582278
KDM5B	ENST00000235790.9	full-splice_match	1	0	0	4467	3825	642	0	0.483994	0.469927	0.567652	0	0.0596546	0.0478807	0.0714286	0.05573	0.0431711	0.032967	0.0156986	0.0478807	0.0847724	0.0620094	0.0525903	0.0455259	0.0243328	0.0345369	0.0761381	0.0510204	0.0525903	0.0290424	0.0816327	0.0400314	0.0572998	0.0345369	0.0164835	0.0572998	0.0235479	0.00941915	0.0125589	0.0133438	0.0290424	0.043956	0.0745683	0.0596546	0.0965463	0.0408163	0.0690738	0.0518053
P3H1	ENST00000236040.8	full-splice_match	1	0	0	2993	2412	41	540	0.574674	0.571132	0.690476	0.581481	0.0236613	0.0373599	0.0647572	0.0224159	0.0348692	0.0523039	0.0249066	0.0547945	0.0647572	0.0647572	0.0535492	0.0361146	0.00996264	0.0323786	0.0485679	0.0249066	0.0473225	0.0410959	0.0734745	0.0373599	0.0684932	0.0647572	0.0448319	0.0896638	0.0348692	0.0510585	0.0336239	0.01868	0.0348692	0.0473225	0.0946451	0.0585305	0.0697385	0.0535492	0.0772105	0.0336239
PPP1R8	ENST00000236412.11	full-splice_match	1	0	0	2414	381	948	1085	0.490058	0.565789	0.559536	0.402765	0.047619	0.0634921	0.0873016	0.0238095	0.047619	0.0634921	0.00793651	0.047619	0.0634921	0.0714286	0.0634921	0.0396825	0.0238095	0.0238095	0.0634921	0.00793651	0.0555556	0.047619	0.111111	0.0634921	0.0952381	0.111111	0.00793651	0.103175	0	0.00793651	0.0238095	0.015873	0.015873	0.0396825	0.0952381	0.0634921	0.103175	0.031746	0.0396825	0.015873
SLC8A2	ENST00000236877.11	full-splice_match	1	0	0	4959	2763	121	2075	0.620488	0.645909	0.647541	0.58506	0.00652174	0.0228261	0.0347826	0.00869565	0.025	0.0543478	0.0641304	0.0271739	0.0293478	0.0565217	0.0706522	0.0173913	0.0076087	0.0467391	0.023913	0.0119565	0.0358696	0.0576087	0.0543478	0.0576087	0.0630435	0.0391304	0.073913	0.0641304	0.0554348	0.0836957	0.0793478	0.048913	0.0206522	0.048913	0.0956522	0.0467391	0.023913	0.0608696	0.0782609	0.0184783
CAMSAP2	ENST00000236925.8	full-splice_match	1	0	0	7161	4467	49	2645	0.373691	0.411106	0.64	0.305482	0.101478	0.0611559	0.0927419	0.0752688	0.0598118	0.0389785	0.0114247	0.0477151	0.0900538	0.0430108	0.0530914	0.0497312	0.046371	0.046371	0.0658602	0.0604839	0.0705645	0.0383065	0.0732527	0.0483871	0.0611559	0.0221774	0.00537634	0.046371	0.0107527	0.0047043	0.00873656	0.0134409	0.0302419	0.0396505	0.0611559	0.0584677	0.109543	0.0302419	0.046371	0.0571237
B4GALT6	ENST00000237019.11	full-splice_match	1	0	0	2128	1029	145	954	0.416823	0.42607	0.671233	0.367925	0.0555556	0.0497076	0.0614035	0.0789474	0.0497076	0.0350877	0.0146199	0.0409357	0.0614035	0.0233918	0.0526316	0.0380117	0.0555556	0.0555556	0.0818713	0.0643275	0.0760234	0.0204678	0.0526316	0.0643275	0.0701754	0.0175439	0.0146199	0.0467836	0.0233918	0.00877193	0.0204678	0.0204678	0.0204678	0.0497076	0.0584795	0.0614035	0.0672515	0.0350877	0.0380117	0.0643275
DOP1A	ENST00000237163.9	full-splice_match	1	0	0	7995	7428	260	307	0.41676	0.416588	0.547893	0.309446	0.0654545	0.0517172	0.0686869	0.0606061	0.0638384	0.0351515	0.00848485	0.0553535	0.0791919	0.0484848	0.040404	0.0690909	0.0375758	0.050101	0.0646465	0.0642424	0.0666667	0.0367677	0.0880808	0.0573737	0.0561616	0.0157576	0.00646465	0.0408081	0.0105051	0.0040404	0.00444444	0.00767677	0.030303	0.0505051	0.0638384	0.0642424	0.0767677	0.0412121	0.0480808	0.0517172
FBXO30	ENST00000237281.5	full-splice_match	1	0	0	9051	2235	209	6607	0.349575	0.418532	0.738095	0.313909	0.0658602	0.0295699	0.0698925	0.077957	0.0497312	0.0295699	0.0107527	0.0430108	0.0685484	0.0497312	0.0456989	0.0577957	0.0403226	0.0537634	0.100806	0.0591398	0.063172	0.0268817	0.0752688	0.0712366	0.0591398	0.0147849	0.00672043	0.0322581	0.0134409	0.00537634	0.00537634	0.0094086	0.030914	0.0241935	0.0430108	0.0712366	0.0806452	0.0403226	0.0389785	0.0577957
TNFAIP3	ENST00000237289.8	full-splice_match	1	0	0	4432	2370	66	1996	0.479693	0.524272	0.597015	0.422846	0.0532319	0.0570342	0.0735108	0.0443599	0.0583016	0.0367554	0.026616	0.0532319	0.0684411	0.0621039	0.0468948	0.0392902	0.0114068	0.0392902	0.0608365	0.0329531	0.0671736	0.0519645	0.0912548	0.0532319	0.0785805	0.0570342	0.0304183	0.0684411	0.0202788	0.0253485	0.0367554	0.0139417	0.0126743	0.0557668	0.0709759	0.0506971	0.0925222	0.0380228	0.0544994	0.0342205
PMFBP1	ENST00000237353.15	full-splice_match	1	0	0	3427	3021	162	244	0.496644	0.505629	0.361963	0.47541	0.0646123	0.0516899	0.134195	0.0337972	0.0695825	0.0377734	0.0149105	0.0397614	0.134195	0.0954274	0.0994036	0.0427435	0.0178926	0.0347913	0.0497018	0.0208748	0.0775348	0.0457256	0.112326	0.0357853	0.0586481	0.0218688	0.0159046	0.0536779	0.0198807	0.00994036	0.0198807	0.00596421	0.0208748	0.0447316	0.082505	0.0387674	0.126243	0.0497018	0.11829	0.0417495
RNF103	ENST00000237455.5	full-splice_match	1	0	0	3482	2055	979	448	0.492246	0.42113	0.727551	0.303571	0.0526316	0.0365497	0.0789474	0.0657895	0.0526316	0.0380117	0.00438596	0.0540936	0.0643275	0.0453216	0.0438596	0.0409357	0.0555556	0.0263158	0.0730994	0.0701754	0.0511696	0.0380117	0.0511696	0.0511696	0.0482456	0.0248538	0.0146199	0.0394737	0.0146199	0.00730994	0.0116959	0.00438596	0.0248538	0.0292398	0.0687135	0.0760234	0.0847953	0.0292398	0.0453216	0.0540936
ARMC2	ENST00000237512.4	full-splice_match	1	0	0	836	668	168	0	0.492823	0.449775	0.662722	0	0.103759	0.0586466	0.0992481	0.0586466	0.0496241	0.0541353	0.00902256	0.0360902	0.103759	0.0451128	0.0496241	0.0631579	0.0225564	0.0676692	0.0586466	0.0496241	0.0721805	0.0360902	0.0947368	0.0586466	0.0947368	0.0406015	0.0135338	0.081203	0.0135338	0.00902256	0.0135338	0.00451128	0.0315789	0.0721805	0.0496241	0.0586466	0.0992481	0.0406015	0.0406015	0.0451128
SOGA1	ENST00000237536.9	full-splice_match	1	0	0	14218	4983	194	9041	0.564425	0.639502	0.794872	0.518084	0.0138554	0.023494	0.0674699	0.00903614	0.0319277	0.0409639	0.0307229	0.023494	0.063253	0.112048	0.0891566	0.0301205	0.00481928	0.0204819	0.0355422	0.00783133	0.0433735	0.0355422	0.104819	0.0283133	0.0644578	0.0506024	0.0716867	0.0650602	0.0415663	0.0560241	0.0704819	0.0162651	0.0138554	0.0626506	0.110843	0.0301205	0.0475904	0.0566265	0.116265	0.0240964
PKD2	ENST00000237596.7	full-splice_match	1	0	0	5089	2904	99	2086	0.450187	0.517396	0.78	0.340844	0.0392968	0.0465357	0.0599793	0.0361944	0.0392968	0.0361944	0.0227508	0.0486039	0.0589452	0.0579111	0.0599793	0.0444674	0.0279214	0.0392968	0.0579111	0.0434333	0.0496381	0.0268873	0.0672182	0.0423992	0.0465357	0.0341262	0.0527404	0.0361944	0.0351603	0.0341262	0.0455016	0.0217166	0.0341262	0.0434333	0.0599793	0.0537746	0.0754912	0.0403309	0.073423	0.0568769
ABCG2	ENST00000237612.8	full-splice_match	1	0	0	4206	1965	273	1968	0.391821	0.430244	0.50365	0.337907	0.0519878	0.0489297	0.0642202	0.0519878	0.0489297	0.0336391	0.0183486	0.0565749	0.0626911	0.0550459	0.0474006	0.0366972	0.0397554	0.0611621	0.0657492	0.0611621	0.0626911	0.0366972	0.0749235	0.059633	0.0535168	0.0137615	0.00764526	0.0519878	0.0214067	0.00458716	0.0122324	0.0122324	0.0229358	0.0428135	0.0672783	0.0840979	0.0703364	0.0321101	0.0428135	0.059633
ELL2	ENST00000237853.9	full-splice_match	1	0	0	5826	1920	130	3776	0.388774	0.454403	0.687023	0.345074	0.0907668	0.0500782	0.0876369	0.0719875	0.056338	0.0547731	0.0187793	0.0438185	0.0970266	0.0547731	0.056338	0.0453834	0.0422535	0.0485133	0.0500782	0.0516432	0.0892019	0.0359937	0.084507	0.0406886	0.0672926	0.0344288	0.0219092	0.0610329	0.0187793	0.0140845	0.0234742	0.0109546	0.0438185	0.0625978	0.0547731	0.0375587	0.0798122	0.0547731	0.056338	0.0391236
DDX55	ENST00000238146.9	full-splice_match	1	0	0	2656	1800	50	806	0.46122	0.489161	0.745098	0.380893	0.0801336	0.0417362	0.108514	0.048414	0.0434057	0.0233723	0.015025	0.0317195	0.108514	0.0534224	0.0684474	0.0350584	0.0250417	0.033389	0.0634391	0.048414	0.0601002	0.0317195	0.0767947	0.0550918	0.048414	0.0350584	0.0267112	0.0500835	0.0166945	0.0317195	0.0217028	0.0100167	0.00500835	0.033389	0.081803	0.0434057	0.110184	0.033389	0.0734558	0.0534224
LGALS8	ENST00000238181.11	full-splice_match	1	0	0	819	527	292	0	0.501832	0.463878	0.569966	0	0.0801527	0.0458015	0.0629771	0.0687023	0.0400763	0.0458015	0.0400763	0.028626	0.0458015	0.0400763	0.0515267	0.0229008	0.0343511	0.0572519	0.0744275	0.0515267	0.0629771	0.0400763	0.0629771	0.0458015	0.0515267	0.0343511	0.0229008	0.0744275	0.0171756	0.028626	0.0171756	0.0343511	0.0400763	0.0171756	0.0687023	0.0515267	0.0858779	0.0400763	0.028626	0.0744275
HDHD3	ENST00000238379.9	full-splice_match	1	0	0	1834	753	898	183	0.561614	0.62234	0.51168	0.557377	0.008	0.036	0.024	0.004	0.048	0.068	0.028	0.04	0.032	0.044	0.096	0.02	0.02	0.02	0.036	0.016	0.024	0.064	0.096	0.04	0.084	0.072	0.04	0.112	0.02	0.024	0.04	0.012	0.024	0.064	0.132	0.06	0.024	0.056	0.052	0.036
ALG2	ENST00000238477.5	full-splice_match	1	1	0	2966	414	48	2504	0.438975	0.690073	0.693878	0.392572	0	0.00729927	0.0145985	0	0.0145985	0.0437956	0.0510949	0.0364964	0.0218978	0.0656934	0.0510949	0.0218978	0	0.0145985	0.0145985	0.00729927	0.00729927	0.0364964	0.0583942	0.0291971	0.0656934	0.0291971	0.0948905	0.0583942	0.0583942	0.124088	0.109489	0.0583942	0.0291971	0.0364964	0.124088	0.00729927	0.0145985	0.0656934	0.0656934	0.00729927
APC2	ENST00000238483.5	full-splice_match	1	0	0	2394	2192	202	0	0.663325	0.664537	0.650246	0	0.00274098	0.0287803	0.0411147	0.00685244	0.0424852	0.058931	0.0370032	0.0205573	0.0452261	0.0931932	0.0890818	0.0150754	0.00137049	0.0342622	0.0356327	0.00274098	0.0438556	0.0548196	0.0973047	0.0342622	0.0753769	0.0548196	0.0753769	0.0753769	0.0342622	0.0849703	0.0657835	0.0328917	0.0150754	0.0383737	0.134308	0.0178164	0.0301508	0.05619	0.102787	0.0301508
PGF	ENST00000238607.10	full-splice_match	1	0	0	1693	507	335	851	0.635558	0.644269	0.714286	0.599295	0.0119048	0.00595238	0.0535714	0.0178571	0.0119048	0.047619	0.0357143	0.0178571	0.077381	0.0595238	0.0714286	0.0238095	0	0.0178571	0.047619	0	0.0119048	0.0416667	0.0714286	0.0238095	0.0535714	0.0654762	0.0714286	0.077381	0.0297619	0.0297619	0.0833333	0.0416667	0.0178571	0.0416667	0.160714	0.0238095	0.0595238	0.0416667	0.107143	0.0238095
NEK9	ENST00000238616.10	full-splice_match	1	0	0	8278	2937	127	5214	0.469316	0.507153	0.75	0.44112	0.0419223	0.0449898	0.0777096	0.0439673	0.0470348	0.0480573	0.0122699	0.0460123	0.0603272	0.0541922	0.0562372	0.0480573	0.0214724	0.0398773	0.0593047	0.0511247	0.0593047	0.0357873	0.0736196	0.0470348	0.0562372	0.0296524	0.0214724	0.0633947	0.0194274	0.0143149	0.0276074	0.0204499	0.0265849	0.0419223	0.101227	0.0357873	0.0848671	0.0460123	0.0582822	0.0490798
IRF2BPL	ENST00000238647.5	full-splice_match	1	0	0	4166	2388	916	862	0.628421	0.679514	0.733915	0.37471	0.0138365	0.0389937	0.0402516	0.0113208	0.027673	0.0566038	0.0427673	0.0213836	0.0339623	0.0993711	0.0427673	0.0226415	0.00251572	0.0163522	0.0264151	0.0150943	0.045283	0.0440252	0.0968553	0.0238994	0.0742138	0.0830189	0.109434	0.0566038	0.0389937	0.110692	0.0955975	0.0415094	0.0201258	0.045283	0.0767296	0.0327044	0.0377358	0.0389937	0.0566038	0.0150943
FLVCR2	ENST00000238667.9	full-splice_match	1	0	0	3629	1578	353	1698	0.504547	0.5409	0.601695	0.45053	0.0209524	0.0419048	0.0380952	0.032381	0.04	0.0514286	0.0114286	0.0438095	0.0342857	0.0552381	0.0457143	0.0285714	0.0152381	0.0761905	0.0419048	0.0266667	0.0533333	0.047619	0.0685714	0.0761905	0.0819048	0.0590476	0.0285714	0.0819048	0.00761905	0.0152381	0.032381	0.0247619	0.0266667	0.0838095	0.100952	0.0609524	0.0495238	0.0285714	0.0419048	0.0266667
DLST	ENST00000238671.11	full-splice_match	1	1	1	1464	201	38	1225	0.53347	0.56	0.717949	0.523265	0	0.0757576	0.030303	0	0.0606061	0.030303	0.0151515	0.030303	0.0606061	0.0454545	0.0909091	0.030303	0	0.0151515	0.030303	0.0151515	0.0151515	0	0.166667	0.0151515	0.0454545	0.0757576	0.0606061	0.0909091	0.0151515	0.0757576	0.0151515	0.030303	0.0454545	0.0757576	0.0909091	0.0606061	0.0606061	0.030303	0.0151515	0.0151515
TGFB3	ENST00000238682.8	full-splice_match	1	0	0	3431	1236	1102	1093	0.518508	0.548988	0.527652	0.47484	0.0364964	0.053528	0.0608273	0.0413625	0.0608273	0.0608273	0.0170316	0.0486618	0.0632603	0.0632603	0.0656934	0.0218978	0.0145985	0.0462287	0.0559611	0.0291971	0.0681265	0.0681265	0.0656934	0.0437956	0.0875912	0.0583942	0.0291971	0.0705596	0.0218978	0.0170316	0.0389294	0.0121655	0.0316302	0.0462287	0.0924574	0.053528	0.0729927	0.0389294	0.0729927	0.0413625
RHOQ	ENST00000238738.9	full-splice_match	1	0	0	4780	615	557	3608	0.423431	0.473941	0.854839	0.348115	0.0686275	0.0539216	0.0735294	0.0490196	0.0245098	0.0637255	0.0490196	0.0637255	0.0686275	0.0441176	0.0588235	0.0245098	0.0441176	0.0245098	0.0931373	0.0294118	0.0637255	0.0343137	0.0441176	0.0245098	0.0490196	0.0343137	0.0441176	0.0441176	0.0245098	0.0196078	0.0490196	0.0343137	0.0490196	0.0490196	0.0343137	0.0539216	0.0735294	0.0686275	0.0490196	0.0539216
TMEM214	ENST00000238788.14	full-splice_match	1	0	0	2978	2067	51	860	0.569174	0.580348	0.75	0.531395	0.0203488	0.0334302	0.0726744	0.0101744	0.0421512	0.0755814	0.0116279	0.0406977	0.0479651	0.0915698	0.0668605	0.0319767	0.0145349	0.0319767	0.0305233	0.0130814	0.056686	0.0552326	0.0973837	0.0406977	0.0886628	0.0537791	0.0305233	0.0988372	0.0159884	0.0174419	0.0363372	0.0116279	0.0319767	0.0625	0.139535	0.0523256	0.0508721	0.0450581	0.0610465	0.0247093
ATAD2B	ENST00000238789.10	full-splice_match	1	0	0	8112	4374	353	3385	0.405079	0.421678	0.723164	0.350369	0.0864791	0.0507893	0.0899108	0.0713795	0.0528483	0.0384351	0.0109815	0.0446122	0.106383	0.0466712	0.0603981	0.0507893	0.0514756	0.05628	0.0583391	0.0583391	0.0624571	0.0329444	0.0713795	0.0494166	0.050103	0.0144132	0.0137268	0.0425532	0.0144132	0.0102951	0.0157859	0.00960879	0.0288264	0.0398078	0.05628	0.0535347	0.108442	0.0377488	0.0631434	0.0590254
AFTPH	ENST00000238856.8	full-splice_match	1	0	0	4040	2727	340	973	0.410149	0.413426	0.668622	0.31038	0.0726872	0.0506608	0.0859031	0.0715859	0.05837	0.0396476	0.00660793	0.0627753	0.0881057	0.0572687	0.0462555	0.0594714	0.0418502	0.0264317	0.0792952	0.0605727	0.0660793	0.0440529	0.0759912	0.0462555	0.0660793	0.0176211	0.00550661	0.0385463	0.00881057	0.00330396	0.00770925	0.00330396	0.0264317	0.0319383	0.0594714	0.0638767	0.0969163	0.0407489	0.0462555	0.0704846
SLF2	ENST00000238961.9	full-splice_match	1	0	0	6892	3519	148	3225	0.397998	0.415577	0.66443	0.366512	0.103242	0.0520478	0.100683	0.0682594	0.0639932	0.0392491	0.00682594	0.0452218	0.101536	0.0469283	0.0554608	0.0477816	0.0383959	0.0520478	0.0588737	0.0571672	0.0656997	0.0383959	0.0853242	0.0494881	0.052901	0.0213311	0.0102389	0.0520478	0.00767918	0.00853242	0.00853242	0.00767918	0.0443686	0.03157	0.0588737	0.059727	0.110068	0.0375427	0.0383959	0.0537543
PPP1R3C	ENST00000238994.6	full-splice_match	1	0	0	2541	951	102	1488	0.420307	0.458947	0.650485	0.379704	0.0443038	0.0474684	0.0601266	0.0601266	0.0506329	0.0443038	0.0221519	0.0537975	0.0981013	0.0379747	0.0221519	0.0537975	0.0221519	0.0379747	0.0696203	0.0506329	0.0601266	0.056962	0.0696203	0.0411392	0.0664557	0.0253165	0.0221519	0.0506329	0.0348101	0.00316456	0.00632911	0.028481	0.0158228	0.0506329	0.0696203	0.0696203	0.0791139	0.0537975	0.0601266	0.056962
MSX2	ENST00000239243.7	full-splice_match	1	0	0	2195	801	78	1316	0.470159	0.63	0.620253	0.363982	0.037594	0.0263158	0.0676692	0.018797	0.0263158	0.0676692	0.0150376	0.018797	0.0526316	0.0789474	0.0676692	0.0263158	0.018797	0.0225564	0.0413534	0.0112782	0.0488722	0.0451128	0.093985	0.037594	0.093985	0.0864662	0.093985	0.0864662	0.0338346	0.0864662	0.0601504	0.0338346	0.0150376	0.0601504	0.0827068	0.0300752	0.0639098	0.0413534	0.0639098	0.0150376
LRP11	ENST00000239367.7	full-splice_match	1	0	0	3634	1500	339	1795	0.505504	0.633756	0.776471	0.347075	0.0300601	0.0320641	0.0420842	0.0160321	0.0480962	0.0400802	0.0320641	0.0400802	0.0420842	0.0681363	0.0601202	0.0360721	0.00601202	0.0280561	0.0400802	0.012024	0.0360721	0.0521042	0.0981964	0.0300601	0.0561122	0.0440882	0.0761523	0.0621242	0.0160321	0.0841683	0.0801603	0.0300601	0.0340681	0.0480962	0.122244	0.0260521	0.0501002	0.0460922	0.0561122	0.0280561
CCDC170	ENST00000239374.8	full-splice_match	1	0	0	5306	2145	112	3049	0.415944	0.458955	0.778761	0.372253	0.103641	0.0504202	0.123249	0.0588235	0.0532213	0.0336134	0.0140056	0.047619	0.142857	0.0826331	0.0616246	0.0378151	0.0140056	0.0392157	0.0518207	0.0364146	0.0602241	0.0378151	0.0994398	0.0364146	0.0546218	0.012605	0.0140056	0.0336134	0.0168067	0.0154062	0.012605	0.00840336	0.0196078	0.0420168	0.0728291	0.0602241	0.145658	0.0448179	0.0896359	0.0364146
ARAP3	ENST00000239440.9	full-splice_match	1	0	0	5258	4632	75	551	0.59167	0.602462	0.736842	0.480944	0.0181465	0.0226831	0.0460143	0.0129618	0.0414776	0.0615684	0.0207388	0.0298121	0.0537913	0.0861957	0.0725859	0.0356448	0.00907323	0.0343487	0.0362929	0.0142579	0.0349968	0.0550875	0.114712	0.0356448	0.0848995	0.0855476	0.0356448	0.0887881	0.0187946	0.0265716	0.036941	0.014906	0.0226831	0.0635126	0.114712	0.0427738	0.0375891	0.0537913	0.0790668	0.0324044
PCDHB10	ENST00000239446.6	full-splice_match	1	0	0	3295	2400	200	695	0.484674	0.548562	0.462687	0.270504	0.0400501	0.0425532	0.0375469	0.0425532	0.0588235	0.0475594	0.0337922	0.0300375	0.0600751	0.0438048	0.0650814	0.0275344	0.0187735	0.0362954	0.0337922	0.0387985	0.057572	0.0425532	0.0801001	0.0237797	0.057572	0.0513141	0.0425532	0.068836	0.0262829	0.0525657	0.048811	0.0212766	0.0237797	0.0538173	0.0938673	0.0413016	0.0438048	0.0563204	0.0713392	0.0337922
PCDHB14	ENST00000239449.7	full-splice_match	1	0	0	4417	2394	163	1860	0.45823	0.535311	0.469512	0.358065	0.0388959	0.04266	0.0401506	0.0476788	0.0627353	0.0577164	0.0263488	0.0376412	0.0564617	0.0464241	0.0564617	0.0351317	0.0276035	0.0313676	0.0326223	0.04266	0.0577164	0.0539523	0.0690088	0.0250941	0.0526976	0.0577164	0.04266	0.0664994	0.0401506	0.0401506	0.04266	0.0238394	0.0401506	0.0614806	0.0828105	0.0363864	0.0464241	0.0564617	0.0664994	0.0376412
PCDHB12	ENST00000239450.4	full-splice_match	1	0	0	3853	2385	189	1279	0.458863	0.548238	0.457895	0.292416	0.0453401	0.0465995	0.0327456	0.0541562	0.0541562	0.0428212	0.0327456	0.0428212	0.0528967	0.0453401	0.0604534	0.0302267	0.02267	0.0314861	0.0302267	0.034005	0.0579345	0.0465995	0.0780856	0.0239295	0.059194	0.0579345	0.0415617	0.059194	0.0251889	0.0491184	0.0491184	0.0239295	0.0251889	0.0642317	0.0906801	0.0377834	0.0491184	0.0541562	0.0692695	0.0251889
TNN	ENST00000239462.9	full-splice_match	1	0	0	5042	3897	138	1007	0.560889	0.589579	0.618705	0.441907	0.0146379	0.0285054	0.0631741	0.0177196	0.0739599	0.0616333	0.0362096	0.046225	0.0716487	0.0677966	0.0847458	0.0385208	0.0146379	0.0161787	0.0439137	0.0161787	0.0477658	0.0693374	0.109399	0.0292758	0.0878274	0.0539291	0.0300462	0.0662558	0.0192604	0.0215716	0.0485362	0.0169492	0.0238829	0.0338983	0.113251	0.027735	0.0546995	0.0878274	0.0808937	0.0254237
MTRF1	ENST00000239852.10	full-splice_match	1	1	1	1561	453	377	731	0.417681	0.420354	0.529101	0.358413	0.0466667	0.04	0.1	0.0933333	0.0866667	0.0533333	0	0.02	0.113333	0.0466667	0.06	0.0466667	0.04	0.0666667	0.0533333	0.0666667	0.08	0.04	0.0866667	0.0866667	0.0733333	0.0133333	0.00666667	0.04	0.00666667	0	0	0.00666667	0.00666667	0.0466667	0.0733333	0.0533333	0.113333	0.04	0.06	0.0266667
ELF1	ENST00000239882.7	full-splice_match	1	0	0	3678	1857	317	1504	0.377923	0.446659	0.36478	0.295878	0.079288	0.0598706	0.0695793	0.0501618	0.0647249	0.0453074	0.0177994	0.0485437	0.0647249	0.0614887	0.0550162	0.0679612	0.0323625	0.0485437	0.066343	0.0485437	0.0614887	0.0566343	0.11165	0.0501618	0.0857605	0.0291262	0.012945	0.0453074	0.012945	0.00809061	0.0113269	0.00809061	0.038835	0.038835	0.0598706	0.0404531	0.0889968	0.0291262	0.038835	0.0501618
SORBS3	ENST00000240123.12	full-splice_match	1	0	0	3227	2013	151	1063	0.629377	0.629225	0.730263	0.61524	0.0149254	0.0238806	0.0537313	0.0208955	0.0402985	0.0791045	0.0402985	0.0313433	0.0716418	0.0835821	0.0671642	0.0238806	0.00447761	0.0283582	0.0253731	0.0164179	0.0447761	0.0522388	0.101493	0.0283582	0.0955224	0.125373	0.0686567	0.0835821	0.0358209	0.0373134	0.0507463	0.0223881	0.0253731	0.0522388	0.1	0.0298507	0.0462687	0.0865672	0.0791045	0.019403
RDH10	ENST00000240285.10	full-splice_match	1	0	0	3959	1023	688	2248	0.481435	0.53229	0.775036	0.368327	0.0441176	0.0294118	0.0735294	0.0470588	0.0382353	0.0441176	0.0235294	0.0352941	0.0411765	0.0470588	0.0529412	0.0411765	0.00882353	0.0441176	0.0647059	0.0382353	0.05	0.0411765	0.0352941	0.0676471	0.0470588	0.0235294	0.0352941	0.0705882	0.0176471	0.0441176	0.0411765	0.0264706	0.0235294	0.0323529	0.114706	0.0441176	0.0764706	0.0352941	0.0676471	0.0264706
LUC7L3	ENST00000240304.5	full-splice_match	1	0	0	1972	1296	130	546	0.411258	0.430888	0.648855	0.307692	0.12761	0.0464037	0.180974	0.0533643	0.062645	0.0208817	0.0301624	0.0208817	0.167053	0.0533643	0.0580046	0.0649652	0.0185615	0.0417633	0.0580046	0.0394432	0.0556845	0.0348028	0.0649652	0.0232019	0.0324826	0.0116009	0.025522	0.00928074	0.0464037	0.00696056	0.0301624	0.0278422	0.0208817	0.0208817	0.0324826	0.0185615	0.192575	0.0417633	0.0812065	0.0672854
DLX4	ENST00000240306.5	full-splice_match	1	0	0	2018	720	279	1019	0.565907	0.636996	0.678571	0.484789	0.0209205	0.0376569	0.0460251	0.0083682	0.0209205	0.100418	0.0125523	0.0292887	0.0543933	0.104603	0.0502092	0.0125523	0.0041841	0.0209205	0.0209205	0.0083682	0.041841	0.0376569	0.125523	0.0083682	0.083682	0.129707	0.0669456	0.154812	0.0251046	0.0627615	0.0502092	0.0125523	0.0376569	0.129707	0.104603	0.0376569	0.0376569	0.0460251	0.041841	0.0209205
FAM117A	ENST00000240364.7	full-splice_match	1	0	0	2329	1359	44	926	0.5848	0.636966	0.688889	0.50324	0.0176991	0.0265487	0.0619469	0.00442478	0.0287611	0.0530973	0.0199115	0.0199115	0.0486726	0.103982	0.0663717	0.0265487	0.00442478	0.0376106	0.0265487	0.0110619	0.0420354	0.0553097	0.106195	0.0420354	0.106195	0.0818584	0.0530973	0.126106	0.0243363	0.0265487	0.0530973	0.0199115	0.0110619	0.079646	0.0973451	0.0530973	0.0464602	0.0331858	0.0730088	0.0287611
TMEM131L	ENST00000240487.5	full-splice_match	1	0	0	4299	4161	0	138	0.437776	0.44399	1	0.246377	0.0678211	0.0519481	0.0757576	0.0685426	0.0656566	0.0483405	0.0108225	0.0541126	0.0728716	0.0606061	0.04329	0.038961	0.037518	0.0295815	0.0620491	0.0642136	0.0627706	0.047619	0.0844156	0.0519481	0.0584416	0.030303	0.0180375	0.0606061	0.0137085	0.010101	0.0122655	0.0137085	0.0324675	0.0483405	0.0721501	0.0519481	0.0952381	0.038961	0.0396825	0.036075
TSHZ3	ENST00000240587.5	full-splice_match	1	0	0	5065	3243	217	1605	0.505627	0.565392	0.793578	0.345794	0.0416667	0.0564815	0.0814815	0.0194444	0.0509259	0.0666667	0.0388889	0.0435185	0.0712963	0.0888889	0.0537037	0.0416667	0.012963	0.037037	0.05	0.0111111	0.0712963	0.0657407	0.0944444	0.0518519	0.105556	0.0666667	0.0462963	0.0731481	0.0305556	0.037963	0.0388889	0.0166667	0.0194444	0.0537037	0.0740741	0.0416667	0.0768519	0.0546296	0.0685185	0.0259259
PYROXD1	ENST00000240651.14	full-splice_match	1	0	0	4075	1500	76	2499	0.351902	0.408939	0.61039	0.309724	0.0861723	0.0460922	0.1002	0.0741483	0.0541082	0.0300601	0.012024	0.0360721	0.0901804	0.0501002	0.0561122	0.0501002	0.0521042	0.0501002	0.0781563	0.0681363	0.0460922	0.0220441	0.0761523	0.0561122	0.0340681	0.012024	0.00801603	0.0260521	0.0160321	0.00601202	0.0180361	0.012024	0.0420842	0.0220441	0.0581162	0.0501002	0.118236	0.0300601	0.0420842	0.0721443
ZNF549	ENST00000240719.7	full-splice_match	1	0	0	3969	1881	249	1839	0.457798	0.45	0.684	0.435019	0.0926518	0.0479233	0.0654952	0.0686901	0.0734824	0.0479233	0.00638978	0.0495208	0.086262	0.0527157	0.0543131	0.0415335	0.0351438	0.0479233	0.0798722	0.0335463	0.057508	0.0638978	0.0782748	0.0638978	0.0686901	0.0175719	0.0127796	0.0591054	0.00958466	0.014377	0.00319489	0.00958466	0.0175719	0.028754	0.0415335	0.086262	0.105431	0.0303514	0.0846645	0.0159744
ZSCAN18	ENST00000240727.10	full-splice_match	1	0	0	2779	1530	400	849	0.626125	0.680183	0.678304	0.504122	0.00785855	0.0157171	0.0550098	0.00392927	0.0196464	0.0687623	0.0255403	0.0117878	0.0687623	0.0943026	0.102161	0.021611	0.00196464	0.0196464	0.021611	0.00392927	0.0157171	0.0471513	0.0962672	0.0137525	0.0707269	0.0943026	0.0785855	0.102161	0.0412574	0.0569745	0.0707269	0.0157171	0.0196464	0.0451866	0.133595	0.0235756	0.0569745	0.0471513	0.123772	0.0255403
KALRN	ENST00000240874.7	full-splice_match	1	0	0	6537	4989	157	1391	0.523329	0.539294	0.613924	0.455787	0.0330927	0.043923	0.076414	0.0288809	0.055355	0.0529483	0.0240674	0.0336943	0.0722022	0.0932611	0.0697954	0.0354994	0.0150421	0.0469314	0.0601685	0.0240674	0.0691937	0.0481348	0.10349	0.0487365	0.0788207	0.0306859	0.0204573	0.0691937	0.0252708	0.0216606	0.0379061	0.0108303	0.0186522	0.0559567	0.0842359	0.0451264	0.0655836	0.0541516	0.0830325	0.0535499
PEX16	ENST00000241041.7	full-splice_match	1	0	0	1479	1038	18	423	0.638945	0.642237	0.736842	0.626478	0.0115942	0.0202899	0.0289855	0.00289855	0.0347826	0.0666667	0.0347826	0.026087	0.0376812	0.0869565	0.0550725	0.0318841	0	0.0202899	0.0231884	0.00869565	0.0202899	0.0550725	0.104348	0.0231884	0.0811594	0.0666667	0.0492754	0.101449	0.0231884	0.0405797	0.0608696	0.0463768	0.026087	0.0666667	0.147826	0.0289855	0.0289855	0.0550725	0.0782609	0.0202899
CAT	ENST00000241052.5	full-splice_match	1	0	0	2291	1581	80	630	0.450458	0.493038	0.604938	0.32381	0.0456274	0.0437262	0.0532319	0.0513308	0.0665399	0.0456274	0.013308	0.0551331	0.0570342	0.0437262	0.0627376	0.0323194	0.0209125	0.0646388	0.0570342	0.0513308	0.0551331	0.0513308	0.0836502	0.0684411	0.0798479	0.0361217	0.0285171	0.0551331	0.0152091	0.0152091	0.0361217	0.0171103	0.0228137	0.0361217	0.0798479	0.0532319	0.0646388	0.0532319	0.0551331	0.0494297
FBXO24	ENST00000241071.11	full-splice_match	1	0	0	2259	1740	298	221	0.596724	0.596895	0.608696	0.579186	0.0138169	0.0138169	0.0604491	0.015544	0.0276339	0.0673575	0.0259067	0.0259067	0.0587219	0.0690846	0.0811744	0.0310881	0.0103627	0.0328152	0.0310881	0.0207254	0.0379965	0.0535406	0.100173	0.0276339	0.0949914	0.0673575	0.0328152	0.0949914	0.0189983	0.0328152	0.0362694	0.0224525	0.0345423	0.0621762	0.0863558	0.0500864	0.0466321	0.0483592	0.074266	0.0362694
GJA3	ENST00000241125.4	full-splice_match	1	0	0	5214	1305	180	3729	0.465094	0.677914	0.690608	0.379726	0.00921659	0.0207373	0.0414747	0.00460829	0.0299539	0.0691244	0.0368664	0.0299539	0.0460829	0.0852535	0.0737327	0.00921659	0	0.0483871	0.0230415	0	0.0345622	0.0576037	0.09447	0.0483871	0.09447	0.0898618	0.0921659	0.0506912	0.0322581	0.0921659	0.0829493	0.0345622	0.0230415	0.0391705	0.105991	0.0460829	0.0322581	0.0599078	0.0760369	0.016129
SLITRK3	ENST00000241274.3	full-splice_match	1	0	0	4391	2931	282	1178	0.463448	0.481229	0.625442	0.380306	0.0491803	0.0553279	0.0584016	0.0563525	0.0471311	0.0665984	0.0122951	0.0461066	0.0645492	0.045082	0.057377	0.0420082	0.0276639	0.0379098	0.0512295	0.0502049	0.0604508	0.045082	0.0696721	0.0461066	0.0747951	0.0471311	0.0163934	0.0829918	0.0163934	0.00512295	0.0112705	0.0143443	0.0348361	0.0491803	0.079918	0.0696721	0.0737705	0.0358607	0.0635246	0.0348361
CPXM2	ENST00000241305.4	full-splice_match	1	0	0	3544	2268	148	1128	0.549097	0.569475	0.812081	0.473404	0.0344371	0.0397351	0.0529801	0.0397351	0.0490066	0.0543046	0.0357616	0.0317881	0.0609272	0.0596026	0.0609272	0.0317881	0.0172185	0.0450331	0.0635762	0.0304636	0.0423841	0.0582781	0.0635762	0.0463576	0.0768212	0.0662252	0.0503311	0.0662252	0.0331126	0.0410596	0.0450331	0.0225166	0.0238411	0.0423841	0.0966887	0.0172185	0.0688742	0.0437086	0.0913907	0.0463576
GTDC1	ENST00000241391.9	full-splice_match	1	0	0	2356	1128	88	1140	0.414686	0.420586	0.404494	0.409649	0.0693333	0.0346667	0.0773333	0.0586667	0.0453333	0.0426667	0.008	0.0453333	0.0933333	0.0453333	0.04	0.0293333	0.0453333	0.0586667	0.048	0.0906667	0.056	0.0346667	0.0773333	0.0666667	0.0613333	0.0426667	0.008	0.0586667	0.0106667	0	0.0133333	0.008	0.0106667	0.0346667	0.0853333	0.0613333	0.072	0.0453333	0.0453333	0.064
ACVR2A	ENST00000241416.12	full-splice_match	1	0	0	5214	1539	124	3551	0.367472	0.427178	0.52	0.336243	0.0742187	0.0488281	0.0644531	0.0566406	0.0683594	0.0429688	0.0117188	0.0390625	0.0683594	0.0234375	0.0605469	0.0410156	0.0449219	0.0332031	0.0800781	0.0722656	0.0527344	0.0332031	0.0722656	0.0644531	0.0585938	0.0214844	0.0078125	0.0410156	0.00976562	0.00390625	0.00976562	0.00585938	0.0371094	0.0253906	0.0683594	0.046875	0.0839844	0.0390625	0.0371094	0.0507812
FLT3	ENST00000241453.12	full-splice_match	1	0	0	3826	2979	66	781	0.429953	0.43452	0.835821	0.377721	0.0665323	0.0383065	0.0866935	0.0756048	0.0574597	0.0413306	0.0171371	0.0372984	0.0756048	0.0393145	0.0483871	0.0433468	0.0403226	0.0524194	0.0675403	0.0645161	0.0695565	0.0362903	0.0745968	0.0514113	0.0544355	0.0262097	0.015121	0.0403226	0.016129	0.0100806	0.0191532	0.0171371	0.0282258	0.0383065	0.0574597	0.0483871	0.0987903	0.0332661	0.0403226	0.0584677
RASL11A	ENST00000241463.5	full-splice_match	1	0	0	2542	726	115	1701	0.464988	0.571034	0.775862	0.398589	0.0373444	0.0207469	0.0788382	0.0207469	0.0373444	0.0373444	0.0207469	0.0497925	0.0622407	0.0746888	0.0497925	0.0207469	0.00829876	0.0580913	0.0497925	0.0290456	0.0705394	0.0414938	0.0871369	0.0580913	0.0705394	0.06639	0.0497925	0.0746888	0.033195	0.033195	0.0497925	0.0248963	0.0456432	0.06639	0.0871369	0.0290456	0.0456432	0.0622407	0.0414938	0.0373444
MTERF4	ENST00000241527.10	full-splice_match	1	1	1	4529	1143	22	3364	0.48355	0.491243	0.608696	0.480083	0.0289474	0.0289474	0.0710526	0.0421053	0.0578947	0.0315789	0.0342105	0.0342105	0.0684211	0.0473684	0.107895	0.0631579	0.0131579	0.0263158	0.0763158	0.0526316	0.0578947	0.0289474	0.0921053	0.0421053	0.0421053	0.0236842	0.00526316	0.0684211	0.0315789	0.0131579	0.0157895	0.00526316	0.0184211	0.0421053	0.0736842	0.0526316	0.0578947	0.0736842	0.115789	0.0578947
AHR	ENST00000242057.9	full-splice_match	1	0	0	6243	2544	613	3086	0.407657	0.421156	0.745928	0.329229	0.0590319	0.0625738	0.0696576	0.0672963	0.0755608	0.0472255	0.012987	0.0613932	0.0791027	0.0578512	0.0354191	0.0566706	0.0436836	0.0495868	0.0696576	0.0543093	0.0696576	0.0448642	0.0991736	0.0543093	0.0720189	0.0200708	0.0153483	0.0507674	0.0165289	0.00472255	0.0094451	0.0106257	0.0413223	0.0330579	0.0578512	0.0661157	0.0826446	0.038961	0.0365998	0.0484061
BBS9	ENST00000242067.11	full-splice_match	1	0	0	3996	2661	489	846	0.424925	0.424812	0.569388	0.341608	0.0564334	0.0564334	0.0812641	0.0564334	0.0553047	0.0428894	0.010158	0.0485327	0.0880361	0.0383747	0.0395034	0.0541761	0.037246	0.0440181	0.0586907	0.0699774	0.0699774	0.030474	0.0722348	0.0417607	0.0575621	0.023702	0.0124153	0.0462754	0.01693	0.00790068	0.010158	0.00790068	0.0406321	0.037246	0.0654628	0.0688488	0.0869074	0.0327314	0.0406321	0.0733634
EEPD1	ENST00000242108.9	full-splice_match	1	0	0	4655	1707	613	2335	0.566058	0.596717	0.653094	0.520771	0.0211268	0.0440141	0.0704225	0.0105634	0.0475352	0.0739437	0.0264085	0.028169	0.0440141	0.0985915	0.0809859	0.0352113	0.00880282	0.040493	0.0316901	0.0123239	0.0545775	0.0774648	0.0827465	0.0352113	0.0739437	0.0669014	0.0422535	0.0880282	0.028169	0.0299296	0.0492958	0.0193662	0.0176056	0.0422535	0.096831	0.0387324	0.0580986	0.0457746	0.084507	0.0316901
WIPF3	ENST00000242140.10	full-splice_match	1	0	0	4225	1449	228	2548	0.536568	0.642265	0.720524	0.459969	0.0394191	0.0290456	0.060166	0.0165975	0.0290456	0.0850622	0.0145228	0.0165975	0.0497925	0.0726141	0.0622407	0.0248963	0.00829876	0.0373444	0.0207469	0.0124481	0.0477178	0.0726141	0.0995851	0.0228216	0.109959	0.143154	0.093361	0.114108	0.0290456	0.0871369	0.0352697	0.0103734	0.0165975	0.0975104	0.0643154	0.0477178	0.0414938	0.0290456	0.0394191	0.026971
INHBA	ENST00000242208.5	full-splice_match	1	0	0	6046	1278	229	4539	0.391499	0.55834	0.43913	0.342146	0.0376471	0.0376471	0.0964706	0.00941176	0.0352941	0.0494118	0.0164706	0.0305882	0.0823529	0.0588235	0.0964706	0.0564706	0.00941176	0.0376471	0.0541176	0.0188235	0.0541176	0.0423529	0.0941176	0.0564706	0.0729412	0.0494118	0.0376471	0.0470588	0.0211765	0.0305882	0.04	0.0211765	0.0117647	0.0423529	0.0705882	0.0423529	0.08	0.0423529	0.0870588	0.0423529
RAMP3	ENST00000242249.8	full-splice_match	1	0	0	1323	444	38	841	0.612245	0.616253	0.769231	0.602854	0.00680272	0.047619	0.0204082	0.00680272	0.0340136	0.0612245	0.0340136	0.0544218	0.0544218	0.0204082	0.0748299	0.0272109	0.00680272	0.0340136	0.047619	0	0.0612245	0.0544218	0.0680272	0.047619	0.0680272	0.0748299	0.0612245	0.0272109	0.0340136	0.0612245	0.0272109	0.0544218	0.0136054	0.0272109	0.156463	0.0340136	0.0136054	0.0612245	0.0748299	0.0204082
DNAI1	ENST00000242317.9	full-splice_match	1	0	0	2529	2097	201	231	0.519178	0.516221	0.534653	0.532468	0.0458453	0.0487106	0.100287	0.025788	0.0659026	0.0659026	0.017192	0.0472779	0.0787966	0.0730659	0.0673352	0.0487106	0.017192	0.0429799	0.0644699	0.0286533	0.0744986	0.0530086	0.106017	0.0558739	0.0873926	0.0429799	0.0157593	0.0573066	0.0186246	0.0114613	0.0200573	0.0114613	0.0315186	0.0515759	0.0830946	0.0272206	0.0845272	0.0630372	0.0515759	0.0530086
DCAF10	ENST00000242323.8	full-splice_match	1	0	0	7393	1158	74	6161	0.383065	0.430424	0.626667	0.371206	0.0493506	0.0545455	0.0805195	0.0441558	0.0779221	0.0363636	0.0233766	0.0649351	0.0597403	0.0363636	0.0311688	0.0675325	0.038961	0.0363636	0.0623377	0.0545455	0.0597403	0.0675325	0.0571429	0.0571429	0.0467532	0.0207792	0.00779221	0.0363636	0.0207792	0.00779221	0.012987	0.012987	0.038961	0.0545455	0.0649351	0.0779221	0.0779221	0.0467532	0.0311688	0.0571429
ZC3HAV1	ENST00000242351.10	full-splice_match	1	0	0	7177	2706	389	4082	0.442664	0.492052	0.648718	0.39025	0.0566038	0.0421754	0.0688124	0.0488346	0.0477248	0.0488346	0.0244173	0.0421754	0.0788013	0.0488346	0.0588235	0.036626	0.0255272	0.0643729	0.0521643	0.036626	0.0621532	0.0499445	0.0832408	0.0466149	0.0732519	0.0344062	0.0344062	0.0577137	0.0288568	0.0210877	0.0299667	0.0210877	0.0221976	0.0521643	0.0743618	0.0521643	0.0721421	0.045505	0.0588235	0.054384
EGR2	ENST00000242480.4	full-splice_match	1	0	0	2979	1428	337	1214	0.509567	0.60897	0.45858	0.406919	0.0105263	0.0273684	0.0357895	0.0147368	0.0484211	0.12	0.0147368	0.0378947	0.0505263	0.0778947	0.04	0.0357895	0.0126316	0.0442105	0.0252632	0.0126316	0.0378947	0.08	0.115789	0.0442105	0.132632	0.103158	0.0631579	0.111579	0.0147368	0.0421053	0.0442105	0.0210526	0.0273684	0.0778947	0.0905263	0.0442105	0.0252632	0.0715789	0.0421053	0.0210526
FAM149B1	ENST00000242505.11	full-splice_match	1	0	0	5455	1746	221	3488	0.421815	0.467049	0.761261	0.37758	0.0550775	0.0344234	0.0843373	0.0499139	0.0722892	0.0430293	0.00860585	0.0395869	0.0740103	0.0567986	0.0516351	0.0671256	0.0344234	0.0722892	0.060241	0.0378657	0.060241	0.0533563	0.0895009	0.0654045	0.0740103	0.0292599	0.0189329	0.0516351	0.0344234	0.0120482	0.00860585	0.00516351	0.0395869	0.0722892	0.0533563	0.0413081	0.0877797	0.0395869	0.060241	0.0516351
IFT81	ENST00000242591.10	full-splice_match	1	0	0	3124	2028	526	570	0.400128	0.376418	0.622391	0.278947	0.128889	0.0755556	0.127407	0.0859259	0.0533333	0.0237037	0.0103704	0.0488889	0.114074	0.0622222	0.0577778	0.0637037	0.0577778	0.037037	0.0681481	0.0622222	0.0859259	0.0133333	0.0755556	0.0325926	0.04	0.0133333	0.00592593	0.0192593	0.0118519	0.00148148	0.00592593	0.0162963	0.0251852	0.0192593	0.0503704	0.0503704	0.143704	0.0192593	0.0725926	0.0533333
HVCN1	ENST00000242607.13	full-splice_match	1	0	0	1685	819	139	727	0.505638	0.523227	0.635714	0.460798	0.0294118	0.0441176	0.0625	0.0294118	0.0551471	0.0441176	0.0220588	0.0404412	0.0625	0.0441176	0.0845588	0.0330882	0.00367647	0.0625	0.0588235	0.0404412	0.0477941	0.0588235	0.0735294	0.0698529	0.0625	0.0514706	0.0330882	0.0625	0.0220588	0.0183824	0.0183824	0.0183824	0.0183824	0.0477941	0.0919118	0.0588235	0.0625	0.0441176	0.0845588	0.0441176
BHLHE41	ENST00000242728.5	full-splice_match	1	0	0	3743	1446	258	2039	0.490248	0.649827	0.571429	0.366846	0.037422	0.031185	0.0561331	0.024948	0.037422	0.0540541	0.022869	0.029106	0.0540541	0.0810811	0.04158	0.012474	0.016632	0.022869	0.016632	0.031185	0.033264	0.039501	0.0623701	0.024948	0.037422	0.0977131	0.143451	0.0727651	0.043659	0.133056	0.10395	0.018711	0.012474	0.0540541	0.0852391	0.04158	0.0623701	0.047817	0.0623701	0.024948
SSPN	ENST00000242729.7	full-splice_match	1	0	0	4533	729	100	3704	0.396426	0.585165	0.722772	0.350432	0.0206612	0.0247934	0.0289256	0.00826446	0.0289256	0.0371901	0.0371901	0.0495868	0.0247934	0.053719	0.053719	0.0247934	0.0165289	0.0289256	0.0413223	0.0289256	0.0289256	0.0413223	0.0743802	0.0413223	0.0495868	0.053719	0.0661157	0.0702479	0.0289256	0.0454545	0.0619835	0.0165289	0.0206612	0.0619835	0.11157	0.0702479	0.0289256	0.0578512	0.0413223	0.0289256
ZNF442	ENST00000242804.9	full-splice_match	1	0	0	6274	1881	633	3760	0.417915	0.412766	0.599369	0.389894	0.103834	0.057508	0.107029	0.0607029	0.0782748	0.0335463	0.00479233	0.0623003	0.0878594	0.0447284	0.0383387	0.0495208	0.0463259	0.0271565	0.115016	0.043131	0.0383387	0.0591054	0.0447284	0.071885	0.0271565	0.0191693	0.00319489	0.0702875	0.0111821	0.00319489	0.00479233	0.0111821	0.028754	0.0415335	0.0479233	0.057508	0.13738	0.0367412	0.0495208	0.0415335
ATP7B	ENST00000242839.10	full-splice_match	1	0	0	6598	4395	113	2090	0.5194	0.532772	0.596491	0.487081	0.0403005	0.0327869	0.0689891	0.0314208	0.0498634	0.0484973	0.0211749	0.0286885	0.0546448	0.0560109	0.068306	0.0409836	0.0204918	0.0484973	0.0601093	0.0403005	0.0553279	0.0491803	0.0949454	0.0717213	0.0826503	0.0491803	0.0211749	0.0655738	0.0136612	0.0150273	0.0273224	0.0157104	0.0204918	0.0437158	0.0833333	0.045765	0.0560109	0.0478142	0.0498634	0.0389344
ZC3H13	ENST00000242848.8	full-splice_match	1	0	0	8018	5004	349	2665	0.416189	0.451729	0.62	0.322702	0.094781	0.0515897	0.123575	0.0479904	0.0671866	0.0341932	0.0317936	0.0395921	0.174565	0.0467906	0.0641872	0.0425915	0.0407918	0.0473905	0.0557888	0.0377924	0.0587882	0.0377924	0.0695861	0.0371926	0.0533893	0.0191962	0.0161968	0.0311938	0.0455909	0.0125975	0.0143971	0.0191962	0.0287942	0.0443911	0.0413917	0.0335933	0.137373	0.059988	0.112777	0.0719856
CENPK	ENST00000242872.7	full-splice_match	1	0	0	1576	807	58	711	0.30203	0.351117	0.20339	0.254571	0.11194	0.0746269	0.108209	0.119403	0.0597015	0.0298507	0.00746269	0.0597015	0.134328	0.0186567	0.0298507	0.0410448	0.0559701	0.0559701	0.0895522	0.0708955	0.0522388	0.0335821	0.0410448	0.0447761	0.0335821	0.00746269	0.0149254	0.0335821	0.011194	0.00373134	0.00746269	0.00746269	0.0261194	0.0261194	0.0634328	0.0559701	0.171642	0.0223881	0.0447761	0.0708955
NEUROD4	ENST00000242994.4	full-splice_match	1	0	0	3927	993	349	2585	0.402343	0.491935	0.545714	0.348549	0.0424242	0.0515152	0.1	0.0242424	0.0333333	0.0484848	0.00909091	0.0606061	0.0939394	0.0484848	0.0606061	0.0393939	0.0242424	0.0393939	0.0818182	0.0272727	0.0666667	0.0363636	0.0545455	0.0545455	0.069697	0.0515152	0.00909091	0.0909091	0.00909091	0.00606061	0.00909091	0.00606061	0.0454545	0.0757576	0.0787879	0.0636364	0.0787879	0.0424242	0.0787879	0.0484848
PFDN5	ENST00000243040.10	full-splice_match	1	1	0	564	198	26	340	0.507092	0.51269	0.518519	0.502941	0.0307692	0.0769231	0.123077	0.0307692	0.0461538	0.0461538	0.0615385	0.0153846	0.0615385	0.107692	0.0461538	0.0769231	0	0.0307692	0.0615385	0.0307692	0.0923077	0.0307692	0.0923077	0.0307692	0.0923077	0.0153846	0.0153846	0.0153846	0.0153846	0.0307692	0.0153846	0.0307692	0.0307692	0.0461538	0.123077	0.0153846	0.123077	0.0461538	0.0615385	0.0153846
NR4A1	ENST00000243050.5	full-splice_match	1	0	0	2678	1794	319	565	0.60829	0.633575	0.65625	0.500885	0.0100503	0.0184255	0.0519263	0.00335008	0.0435511	0.0636516	0.0184255	0.0318258	0.0251256	0.0904523	0.0586265	0.0351759	0.00502513	0.0251256	0.0318258	0.00670017	0.041876	0.0603015	0.105528	0.0368509	0.103853	0.0938023	0.0485762	0.127303	0.0217755	0.0335008	0.0502513	0.0150754	0.0234506	0.0737018	0.127303	0.0603015	0.0284757	0.0485762	0.0502513	0.0184255
PDE1B	ENST00000243052.8	full-splice_match	1	0	0	3193	1608	185	1400	0.571876	0.541381	0.731183	0.585714	0.011215	0.0373832	0.0654206	0.0224299	0.0560748	0.0542056	0.0186916	0.0317757	0.0785047	0.0766355	0.0504673	0.0429907	0.011215	0.0392523	0.0672897	0.035514	0.0523364	0.0579439	0.0953271	0.0598131	0.0915888	0.0523364	0.035514	0.0542056	0.0168224	0.0186916	0.0317757	0.0186916	0.0168224	0.0485981	0.0953271	0.0448598	0.0635514	0.0448598	0.0803738	0.0672897
LRP1	ENST00000243077.8	full-splice_match	1	0	0	14923	13632	482	809	0.600751	0.600836	0.654244	0.567367	0.0116663	0.0457847	0.0413823	0.0198107	0.053709	0.0688972	0.0438037	0.0468853	0.0438037	0.059212	0.0429232	0.0367599	0.00506273	0.0405019	0.0633942	0.0138675	0.0699978	0.0578913	0.0774818	0.0477658	0.0867268	0.05547	0.0510676	0.0660357	0.0427031	0.0400616	0.0501871	0.0253137	0.0244332	0.0438037	0.118644	0.0246533	0.0305965	0.0827647	0.0576711	0.0431433
TCEAL3	ENST00000243286.7	full-splice_match	1	0	0	1124	600	262	262	0.541815	0.537563	0.695817	0.396947	0.0954774	0.0351759	0.145729	0.0251256	0.0502513	0.0150754	0.040201	0.0150754	0.110553	0.080402	0.180905	0.0201005	0.0150754	0.0150754	0.080402	0.0201005	0.0653266	0.0100503	0.100503	0.0201005	0.0703518	0.0351759	0.0301508	0.0251256	0.040201	0.0201005	0.0301508	0.00502513	0.0100503	0.0150754	0.0251256	0.0150754	0.130653	0.0502513	0.135678	0.0753769
NRK	ENST00000243300.14	full-splice_match	1	0	0	8066	4746	307	3013	0.418051	0.457956	0.600649	0.336542	0.058191	0.0442758	0.0910816	0.0588235	0.0575585	0.0531309	0.0101202	0.0468058	0.0796964	0.0512334	0.0803289	0.0436433	0.0335231	0.0537634	0.0721063	0.0518659	0.0670462	0.0499684	0.0929791	0.0512334	0.0619861	0.0202404	0.0113852	0.0499684	0.0126502	0.00822264	0.0132827	0.00822264	0.0347881	0.0423782	0.0702087	0.0436433	0.0898166	0.0404807	0.0600886	0.0657812
RIF1	ENST00000243326.9	full-splice_match	1	0	0	15003	7416	483	7104	0.373192	0.378152	0.67562	0.34741	0.111696	0.0623229	0.0882234	0.0987454	0.0493727	0.0307568	0.00971267	0.0590854	0.0898422	0.0433023	0.0412788	0.0534197	0.0513962	0.0461352	0.063537	0.0748685	0.0679887	0.0271145	0.0627276	0.0473493	0.0461352	0.0165925	0.00687981	0.0327803	0.0072845	0.00364225	0.00809389	0.00890328	0.038446	0.0360178	0.0542291	0.0562525	0.116552	0.0283286	0.0473493	0.0501821
TTC21B	ENST00000243344.8	full-splice_match	1	0	0	5415	3948	71	1396	0.392613	0.397517	0.680556	0.363897	0.0828897	0.0547529	0.0836502	0.0828897	0.0539924	0.026616	0.0136882	0.0570342	0.0935361	0.0638783	0.0372624	0.0357414	0.0547529	0.0418251	0.0836502	0.069962	0.0646388	0.0311787	0.0752852	0.0448669	0.0425856	0.0106464	0.00532319	0.0357414	0.0121673	0.00684411	0.00836502	0.0144487	0.0319392	0.0365019	0.0631179	0.0638783	0.104183	0.0311787	0.0479087	0.061597
ACVR1C	ENST00000243349.13	full-splice_match	1	0	0	8853	1479	220	7154	0.352988	0.458728	0.764706	0.318423	0.0731707	0.054878	0.0630081	0.0670732	0.0487805	0.0447154	0.00813008	0.0447154	0.0609756	0.0325203	0.046748	0.0447154	0.046748	0.046748	0.0792683	0.0426829	0.0752033	0.0203252	0.0487805	0.0528455	0.0528455	0.0162602	0.0203252	0.0487805	0.0243902	0.0182927	0.0162602	0.00813008	0.0223577	0.054878	0.0894309	0.050813	0.0894309	0.0487805	0.050813	0.0447154
SLC36A1	ENST00000243389.8	full-splice_match	1	0	0	5772	1428	216	4128	0.510395	0.544499	0.700461	0.488614	0.0168421	0.0315789	0.0294737	0.0336842	0.0378947	0.0694737	0.0231579	0.0442105	0.0273684	0.0589474	0.0357895	0.0168421	0.0189474	0.0757895	0.0484211	0.0252632	0.0421053	0.0589474	0.0610526	0.0821053	0.08	0.0652632	0.0252632	0.115789	0.0126316	0.0273684	0.0231579	0.0210526	0.0336842	0.0694737	0.117895	0.0547368	0.0357895	0.0484211	0.0378947	0.0378947
LTBP4	ENST00000243562.13	full-splice_match	1	0	1	3140	2870	0	270	0.659873	0.66016	0	0.659259	0.00209278	0.0303453	0.0115103	0.0136031	0.0313917	0.0774329	0.0512731	0.0303453	0.0282525	0.0449948	0.0523195	0.0345309	0.00313917	0.0146495	0.0502267	0.00523195	0.018835	0.0711545	0.066969	0.0209278	0.0711545	0.0931287	0.0899895	0.0973143	0.0575514	0.0722009	0.0701081	0.0282525	0.0292989	0.0523195	0.116149	0.0345309	0.0355773	0.0575514	0.0753401	0.0272061
COQ8B	ENST00000243583.10	full-splice_match	1	0	0	2041	1509	24	508	0.627144	0.634615	0.64	0.604331	0.0119522	0.0179283	0.0358566	0.00796813	0.0298805	0.063745	0.0219124	0.0358566	0.0537849	0.0677291	0.0896414	0.0298805	0.00398406	0.0179283	0.0338645	0.0179283	0.0298805	0.0418327	0.115538	0.0338645	0.0896414	0.0657371	0.061753	0.0896414	0.0219124	0.0438247	0.0478088	0.0139442	0.0159363	0.0358566	0.119522	0.0517928	0.0258964	0.0717131	0.0836653	0.0258964
ZNF468	ENST00000243639.8	full-splice_match	1	0	0	4027	381	151	3495	0.402036	0.492105	0.565789	0.385122	0.0238095	0.0238095	0.0634921	0.0555556	0.0873016	0.031746	0.0238095	0.031746	0.0634921	0.0238095	0.0873016	0.0555556	0.0396825	0.0396825	0.031746	0.0634921	0.0793651	0.0396825	0.103175	0.0634921	0.0555556	0.031746	0.015873	0.0793651	0	0.00793651	0.00793651	0.0396825	0.0238095	0.0952381	0.0634921	0.0396825	0.0555556	0.0714286	0.047619	0.0238095
HAUS3	ENST00000243706.8	full-splice_match	1	0	0	5620	1809	230	3581	0.379004	0.351217	0.463203	0.387601	0.112957	0.0531561	0.116279	0.106312	0.0581395	0.0182724	0.00830565	0.0498339	0.106312	0.0448505	0.0465116	0.0614618	0.051495	0.0548173	0.0614618	0.0863787	0.076412	0.0199336	0.0614618	0.0431894	0.0249169	0.00332226	0	0.0166113	0.00498339	0.00332226	0.00498339	0.00996678	0.0431894	0.0265781	0.0415282	0.0564784	0.116279	0.0315615	0.0531561	0.0631229
INHA	ENST00000243786.3	full-splice_match	1	0	0	1351	1098	65	188	0.627683	0.640839	0.666667	0.537234	0.00273973	0.0219178	0.0191781	0.00273973	0.0493151	0.0657534	0.0136986	0.0383562	0.0273973	0.0630137	0.0849315	0.0219178	0.00821918	0.0191781	0.0383562	0	0.0246575	0.0739726	0.10137	0.0383562	0.117808	0.117808	0.0438356	0.10137	0.00821918	0.0246575	0.0328767	0.0109589	0.0164384	0.0767123	0.164384	0.0520548	0.0191781	0.0383562	0.0684932	0.0191781
SP140L	ENST00000243810.10	full-splice_match	1	0	0	2502	1665	0	837	0.463629	0.453726	0	0.483871	0.0938628	0.0559567	0.128159	0.0559567	0.0649819	0.0379061	0.0144404	0.0415162	0.101083	0.0415162	0.0866426	0.0487365	0.032491	0.0306859	0.0559567	0.0487365	0.0902527	0.0288809	0.0541516	0.0361011	0.0487365	0.0216606	0.0144404	0.0451264	0.0216606	0.00902527	0.0162455	0.00361011	0.0180505	0.032491	0.0685921	0.0433213	0.126354	0.0415162	0.0830325	0.0487365
UBE2C	ENST00000243893.10	full-splice_match	1	0	0	476	150	38	288	0.506303	0.657718	0.641026	0.409722	0.0612245	0.0612245	0.0408163	0	0.0408163	0.0816327	0	0.0204082	0	0.142857	0.0612245	0.0204082	0.0204082	0	0.0408163	0.0204082	0.0612245	0.0204082	0.0612245	0.0408163	0.0816327	0.142857	0.183673	0.0408163	0.0408163	0.142857	0.0612245	0.0408163	0.0408163	0.0204082	0.0408163	0.0204082	0.0204082	0.0408163	0.0816327	0.0408163
CTCFL	ENST00000243914.8	full-splice_match	1	0	0	3500	1989	124	1387	0.443714	0.505533	0.704	0.331651	0.0740181	0.0543807	0.107251	0.0362538	0.0589124	0.0528701	0.0302115	0.0362538	0.0891239	0.070997	0.070997	0.0513595	0.0226586	0.0241692	0.0619335	0.0241692	0.0634441	0.0574018	0.0861027	0.0468278	0.0679758	0.0302115	0.021148	0.0558912	0.0287009	0.0256798	0.0226586	0.0135952	0.021148	0.0362538	0.0876133	0.0362538	0.116314	0.0302115	0.0861027	0.0317221
SLC12A5	ENST00000243964.7	full-splice_match	1	0	0	6026	3348	130	2548	0.580319	0.576636	0.717557	0.5781	0.0143498	0.0367713	0.0502242	0.0188341	0.0403587	0.0565022	0.0295964	0.0269058	0.0529148	0.0412556	0.0609865	0.0304933	0.00538117	0.0591928	0.0690583	0.0161435	0.0457399	0.0565022	0.0654709	0.0726457	0.0798206	0.0421525	0.0251121	0.0932735	0.026009	0.0233184	0.0340807	0.0224215	0.0206278	0.0618834	0.114798	0.0430493	0.0547085	0.0358744	0.070852	0.0421525
PLCG1	ENST00000244007.7	full-splice_match	1	0	0	5285	3873	197	1215	0.567077	0.56844	0.792929	0.525926	0.0124031	0.0372093	0.0666667	0.0170543	0.0449612	0.0565891	0.0317829	0.0457364	0.0728682	0.0736434	0.0651163	0.0387597	0.00697674	0.0426357	0.0542636	0.020155	0.0565891	0.0379845	0.0891473	0.0472868	0.0744186	0.0573643	0.0387597	0.0806202	0.0294574	0.0333333	0.0410853	0.0232558	0.0325581	0.0573643	0.0806202	0.0534884	0.0581395	0.0651163	0.0906977	0.0418605
PTGIS	ENST00000244043.5	full-splice_match	1	0	0	5570	1500	21	4049	0.516338	0.587725	0.863636	0.488022	0.0240481	0.0240481	0.0360721	0.0200401	0.0501002	0.0561122	0.0360721	0.0380762	0.0641283	0.0681363	0.0521042	0.0220441	0.01002	0.0280561	0.0561122	0.0160321	0.0320641	0.0601202	0.0941884	0.0320641	0.0701403	0.0541082	0.0420842	0.1002	0.0300601	0.0440882	0.0400802	0.0140281	0.0220441	0.0701403	0.114228	0.0561122	0.0460922	0.0561122	0.0641283	0.0380762
MOCS3	ENST00000244051.3	full-splice_match	1	0	0	5112	1380	25	3707	0.456182	0.59826	0.576923	0.402482	0.0217865	0.0326797	0.0413943	0.0261438	0.0326797	0.0283224	0.0261438	0.0479303	0.037037	0.0610022	0.0457516	0.0305011	0.0108932	0.0217865	0.043573	0.0326797	0.0348584	0.0348584	0.0718954	0.0283224	0.0522876	0.0457516	0.0566449	0.0740741	0.0217865	0.0653595	0.0631808	0.037037	0.0305011	0.0566449	0.12854	0.043573	0.0522876	0.0457516	0.0479303	0.0305011
MPHOSPH10	ENST00000244230.7	full-splice_match	1	0	0	2164	2043	32	89	0.387246	0.392752	0.545455	0.202247	0.15	0.0661765	0.133824	0.0661765	0.0602941	0.0308824	0.0132353	0.0279412	0.133824	0.0558824	0.0632353	0.0514706	0.0455882	0.0323529	0.0867647	0.0514706	0.0691176	0.0117647	0.0735294	0.0294118	0.0338235	0.0176471	0.0102941	0.0397059	0.0102941	0.00441176	0.0176471	0.0102941	0.0117647	0.0161765	0.05	0.0514706	0.139706	0.0352941	0.0764706	0.0985294
LIPE	ENST00000244289.9	full-splice_match	1	0	0	3768	3228	239	301	0.609873	0.615432	0.491667	0.644518	0.0232558	0.0409302	0.04	0.0186047	0.055814	0.064186	0.0297674	0.0344186	0.055814	0.0818605	0.055814	0.027907	0.0130233	0.0381395	0.0353488	0.00837209	0.0511628	0.067907	0.0986047	0.0390698	0.0930233	0.067907	0.0548837	0.0948837	0.0288372	0.055814	0.0455814	0.0195349	0.0288372	0.067907	0.106047	0.0409302	0.0390698	0.0567442	0.0688372	0.0269767
LYPD3	ENST00000244333.4	full-splice_match	1	0	0	1642	1038	37	567	0.591961	0.630665	0.684211	0.514991	0.0144928	0.0376812	0.0318841	0.026087	0.0434783	0.0637681	0.0376812	0.0318841	0.0376812	0.057971	0.0724638	0.0347826	0.00869565	0.0318841	0.0376812	0.0115942	0.0521739	0.0521739	0.110145	0.0289855	0.0956522	0.0695652	0.0608696	0.057971	0.026087	0.0637681	0.0666667	0.0289855	0.0231884	0.0608696	0.113043	0.0289855	0.026087	0.0608696	0.0550725	0.0318841
RNF39	ENST00000244360.8	full-splice_match	1	0	0	2084	1056	184	844	0.605086	0.690995	0.627027	0.492891	0.00854701	0.011396	0.025641	0.014245	0.017094	0.0598291	0.037037	0.025641	0.031339	0.0626781	0.048433	0.014245	0.00569801	0.02849	0.025641	0.014245	0.019943	0.037037	0.048433	0.02849	0.042735	0.0797721	0.122507	0.0826211	0.0569801	0.11396	0.0740741	0.037037	0.011396	0.042735	0.145299	0.034188	0.022792	0.0769231	0.0769231	0.022792
DST	ENST00000244364.10	full-splice_match	1	0	0	16742	15513	208	1021	0.42247	0.4287	0.358852	0.340842	0.0976789	0.0665377	0.105416	0.0678917	0.0680851	0.0319149	0.00909091	0.054352	0.100774	0.0667311	0.0589942	0.0537718	0.037911	0.0450677	0.0624758	0.0514507	0.0802708	0.034236	0.0953578	0.0410058	0.0487427	0.0179884	0.00967118	0.0324952	0.0133462	0.00715667	0.010058	0.00696325	0.0266925	0.0346228	0.0638298	0.0481625	0.111799	0.0402321	0.0597679	0.0597679
BTN1A1	ENST00000244513.10	full-splice_match	1	0	0	2895	1578	66	1251	0.505009	0.542169	0.537313	0.456435	0.0304762	0.0171429	0.0571429	0.0380952	0.0266667	0.04	0.0266667	0.0495238	0.0780952	0.04	0.0685714	0.032381	0.0152381	0.047619	0.0571429	0.032381	0.0304762	0.0361905	0.0685714	0.0495238	0.0666667	0.0685714	0.032381	0.0761905	0.0266667	0.0228571	0.0247619	0.0190476	0.0380952	0.0704762	0.0952381	0.0419048	0.0704762	0.0628571	0.0780952	0.0457143
BTN3A3	ENST00000244519.7	full-splice_match	1	0	0	2970	1752	211	1007	0.478788	0.522559	0.391509	0.421053	0.0463122	0.0377358	0.0668954	0.0308748	0.0428816	0.0463122	0.0188679	0.0394511	0.077187	0.0566038	0.0566038	0.0480274	0.0222985	0.0566038	0.051458	0.0222985	0.0360206	0.0411664	0.077187	0.0463122	0.058319	0.0497427	0.0154374	0.0857633	0.0137221	0.0188679	0.0188679	0.0154374	0.0240137	0.0548885	0.113208	0.051458	0.0823328	0.0480274	0.0823328	0.0445969
ABCC10	ENST00000244533.7	full-splice_match	1	0	0	5088	4392	359	337	0.587461	0.608517	0.416667	0.495549	0.012987	0.0252905	0.0334928	0.00956938	0.0416951	0.0587833	0.0150376	0.0314422	0.0410116	0.0710868	0.0649351	0.0314422	0.00615174	0.038961	0.0362269	0.012987	0.0328093	0.0560492	0.0997949	0.0416951	0.0854409	0.062201	0.0321258	0.105947	0.0143541	0.0239234	0.0341763	0.0184552	0.0287081	0.0683527	0.142857	0.0533151	0.0287081	0.0369105	0.0587833	0.0252905
H1-3	ENST00000244534.7	full-splice_match	1	0	0	776	663	54	59	0.525773	0.545317	0.345455	0.474576	0.118182	0.0454545	0.227273	0	0.0272727	0.0545455	0.00909091	0.0272727	0.0909091	0.122727	0.0863636	0.0272727	0	0.0227273	0.00454545	0.00454545	0.127273	0.0227273	0.0636364	0.0136364	0.0863636	0.0318182	0.05	0.05	0.0272727	0.0454545	0.0409091	0.00909091	0.0409091	0.0454545	0.0818182	0.0454545	0.113636	0.0227273	0.0318182	0.00454545
UNC5CL	ENST00000244565.8	full-splice_match	1	0	0	3156	1554	121	1481	0.568441	0.613007	0.581967	0.520594	0.0154739	0.0290135	0.0309478	0.0232108	0.0367505	0.0580271	0.0174081	0.0425532	0.0425532	0.0831721	0.0560928	0.0290135	0.00773694	0.0367505	0.0618956	0.00967118	0.0444874	0.065764	0.104449	0.0483559	0.110251	0.073501	0.0386847	0.0947776	0.0193424	0.0464217	0.0386847	0.0116054	0.0290135	0.0522244	0.116054	0.0348162	0.032882	0.032882	0.0638298	0.032882
AARS2	ENST00000244571.5	full-splice_match	1	0	0	4798	2955	24	1819	0.576907	0.617468	0.56	0.51127	0.0152439	0.0264228	0.0406504	0.00914634	0.0335366	0.0538618	0.0193089	0.0447154	0.0447154	0.078252	0.0873984	0.0284553	0.0101626	0.0254065	0.0457317	0.00914634	0.0335366	0.0487805	0.106707	0.0386179	0.078252	0.0670732	0.0345528	0.0772358	0.0193089	0.0264228	0.0406504	0.023374	0.0172764	0.0426829	0.134146	0.0426829	0.0376016	0.0558943	0.0731707	0.0304878
ZNF391	ENST00000244576.9	full-splice_match	1	0	0	4042	1074	504	2464	0.408461	0.416589	0.550495	0.375812	0.109244	0.0644258	0.092437	0.106443	0.0784314	0.0392157	0.0112045	0.0532213	0.092437	0.0616246	0.0308123	0.0616246	0.0308123	0.0644258	0.0728291	0.0308123	0.070028	0.0504202	0.0840336	0.0532213	0.0336134	0.0168067	0.0168067	0.0616246	0.022409	0.00560224	0.00840336	0.00840336	0.0252101	0.0448179	0.0308123	0.070028	0.159664	0.0280112	0.0560224	0.0112045
KLHDC3	ENST00000244670.12	full-splice_match	1	0	0	1903	744	591	568	0.569101	0.523553	0.618243	0.577465	0.0121457	0.0323887	0.048583	0.0404858	0.0566802	0.0647773	0.00809717	0.0566802	0.0364372	0.0404858	0.0445344	0.0404858	0.0242915	0.0323887	0.0728745	0.048583	0.0566802	0.048583	0.0526316	0.0688259	0.0890688	0.0242915	0.048583	0.0728745	0.0202429	0.0283401	0.0202429	0.0161943	0.0202429	0.048583	0.109312	0.0607287	0.0526316	0.0769231	0.0404858	0.0323887
COL21A1	ENST00000244728.10	full-splice_match	1	0	0	4173	2871	232	1070	0.439732	0.467944	0.592275	0.330841	0.0732218	0.0491632	0.107741	0.0543933	0.0481172	0.0449791	0.00941423	0.0282427	0.0805439	0.0345188	0.103556	0.0376569	0.0303347	0.0366109	0.0606695	0.0606695	0.082636	0.0188285	0.0805439	0.0261506	0.0711297	0.039749	0.0167364	0.0564854	0.0146444	0.00209205	0.0135983	0.0104603	0.0219665	0.0334728	0.0564854	0.0345188	0.0962343	0.0366109	0.0449791	0.0711297
SOX4	ENST00000244745.4	full-splice_match	1	0	0	4869	1422	784	2663	0.525159	0.705841	0.56051	0.418325	0.0190275	0.0359408	0.0570825	0.00422833	0.02537	0.05074	0.0401691	0.0295983	0.0422833	0.0866808	0.0338266	0.0232558	0	0.0190275	0.0190275	0.00422833	0.0591966	0.038055	0.0528541	0.0232558	0.0570825	0.0613108	0.109937	0.0993658	0.0718816	0.135307	0.137421	0.0274841	0.012685	0.112051	0.0655391	0.0169133	0.0359408	0.0549683	0.0676533	0.0147992
CPNE5	ENST00000244751.7	full-splice_match	1	0	0	3342	1779	67	1496	0.587672	0.577615	0.647059	0.596925	0.027027	0.0456081	0.0472973	0.0202703	0.0456081	0.0658784	0.0523649	0.0422297	0.0472973	0.0523649	0.0472973	0.0371622	0.00675676	0.0489865	0.0472973	0.0337838	0.0591216	0.0675676	0.0709459	0.0675676	0.0929054	0.0760135	0.0422297	0.0709459	0.0388514	0.0456081	0.0371622	0.0388514	0.0236486	0.035473	0.0929054	0.0304054	0.0489865	0.0574324	0.0625	0.0388514
DEK	ENST00000244776.11	full-splice_match	1	0	0	1441	1023	166	252	0.419153	0.398239	0.700599	0.31746	0.173529	0.0735294	0.152941	0.0735294	0.0411765	0.0352941	0.0117647	0.0352941	0.129412	0.0382353	0.0941176	0.0647059	0.0235294	0.0294118	0.0617647	0.0470588	0.0558824	0.0205882	0.0617647	0.0235294	0.0529412	0.0235294	0.0205882	0.0264706	0.0264706	0.00588235	0.0117647	0.00294118	0.0411765	0.00588235	0.0411765	0.0411765	0.173529	0.0117647	0.0823529	0.0558824
LRRFIP1	ENST00000244815.9	full-splice_match	1	0	0	4370	2352	240	1778	0.445309	0.480647	0.809129	0.349269	0.0868455	0.0472542	0.122605	0.0561941	0.0727969	0.0421456	0.0140485	0.0344828	0.14304	0.0664112	0.0906769	0.0536398	0.0229885	0.0357599	0.0613027	0.0242656	0.063857	0.037037	0.10728	0.0319285	0.054917	0.0332056	0.0229885	0.0383142	0.0255428	0.0191571	0.0204342	0.0114943	0.0229885	0.0306513	0.0498084	0.0217114	0.139208	0.0587484	0.0893997	0.0446999
KATNAL2	ENST00000245121.10	full-splice_match	1	0	0	3618	1398	979	1241	0.467109	0.493916	0.503061	0.408541	0.0580645	0.0408602	0.0752688	0.0494624	0.0537634	0.0430108	0.0193548	0.0516129	0.0924731	0.0688172	0.0645161	0.0494624	0.027957	0.055914	0.0451613	0.0451613	0.0537634	0.0451613	0.107527	0.0430108	0.083871	0.0301075	0.0258065	0.0408602	0.0236559	0.0193548	0.0215054	0.0150538	0.0215054	0.0430108	0.0795699	0.0451613	0.0774194	0.0473118	0.0774194	0.0516129
BBS2	ENST00000245157.11	full-splice_match	1	0	0	2704	2163	162	379	0.45784	0.463922	0.705521	0.316623	0.0416667	0.0388889	0.0486111	0.075	0.0513889	0.0416667	0.0180556	0.0361111	0.0597222	0.0430556	0.0430556	0.0458333	0.0333333	0.0569444	0.0805556	0.0666667	0.0513889	0.0402778	0.0791667	0.0625	0.0583333	0.0277778	0.0180556	0.0416667	0.025	0.00972222	0.0263889	0.0111111	0.0222222	0.0375	0.0791667	0.0444444	0.075	0.0402778	0.0527778	0.0638889
SPHK2	ENST00000245222.9	full-splice_match	1	0	0	2748	1962	151	635	0.659753	0.677206	0.611842	0.617323	0.00153139	0.0214395	0.0183767	0.00459418	0.0245023	0.0781011	0.0321593	0.0367534	0.0352221	0.0627871	0.0382848	0.0137825	0.00459418	0.0245023	0.0275651	0.00459418	0.0122511	0.0796325	0.0704441	0.0321593	0.085758	0.104135	0.0704441	0.127106	0.0214395	0.0704441	0.0627871	0.0214395	0.0275651	0.0826953	0.153139	0.0352221	0.0260337	0.042879	0.050536	0.0199081
RAP2A	ENST00000245304.5	full-splice_match	1	0	0	5540	549	302	4689	0.383935	0.554745	0.831683	0.335039	0.0549451	0.043956	0.0714286	0.021978	0.0549451	0.0659341	0.021978	0.021978	0.0824176	0.0494505	0.043956	0.0604396	0.010989	0.0659341	0.0549451	0.010989	0.0549451	0.021978	0.0769231	0.0659341	0.0604396	0.032967	0.043956	0.0549451	0.043956	0.0384615	0.0549451	0.0494505	0.021978	0.0274725	0.0659341	0.0494505	0.0714286	0.0659341	0.0824176	0.032967
HROB	ENST00000245382.6	full-splice_match	1	0	0	2272	1563	121	588	0.570863	0.559539	0.737705	0.566327	0.0173077	0.0326923	0.0615385	0.0192308	0.0423077	0.0576923	0.0173077	0.0442308	0.0538462	0.0942308	0.0519231	0.0557692	0.0115385	0.0288462	0.0346154	0.025	0.0673077	0.0538462	0.111538	0.0346154	0.0980769	0.0711538	0.0192308	0.105769	0.00961538	0.0153846	0.0211538	0.0115385	0.0230769	0.0826923	0.119231	0.0403846	0.0365385	0.05	0.0653846	0.0384615
SLC22A5	ENST00000245407.8	full-splice_match	1	0	0	3277	1671	263	1343	0.514495	0.55509	0.761364	0.415488	0.0161871	0.0215827	0.0395683	0.0215827	0.0413669	0.0485612	0.0233813	0.0359712	0.0413669	0.0539568	0.0323741	0.0413669	0.0179856	0.0431655	0.057554	0.0323741	0.0341727	0.0467626	0.0773381	0.0647482	0.0719424	0.0413669	0.044964	0.0755396	0.0341727	0.0377698	0.0323741	0.0197842	0.0323741	0.0431655	0.0989209	0.0683453	0.0359712	0.0521583	0.044964	0.0359712
PTGER2	ENST00000245457.6	full-splice_match	1	0	0	2458	1074	237	1147	0.495118	0.602982	0.701681	0.351351	0.0196078	0.0252101	0.022409	0.0252101	0.0140056	0.0756303	0.0280112	0.0336134	0.0280112	0.0448179	0.0308123	0.0308123	0.00840336	0.0280112	0.0504202	0.0252101	0.0280112	0.0448179	0.0672269	0.0560224	0.0560224	0.047619	0.0728291	0.106443	0.0308123	0.0728291	0.0588235	0.0280112	0.0252101	0.0840336	0.114846	0.070028	0.0308123	0.0588235	0.0308123	0.0168067
MYH2	ENST00000245503.10	full-splice_match	1	0	0	6044	5823	86	135	0.497849	0.500687	0.482759	0.385185	0.0628866	0.0561856	0.115464	0.0427835	0.0494845	0.0453608	0.014433	0.0402062	0.113402	0.0752577	0.0994845	0.0335052	0.0159794	0.0458763	0.0608247	0.0304124	0.0793814	0.0293814	0.0860825	0.042268	0.0731959	0.0304124	0.0175258	0.0443299	0.0185567	0.0190722	0.0154639	0.00773196	0.0190722	0.0350515	0.0948454	0.0386598	0.119588	0.0427835	0.108247	0.0515464
ZBTB46	ENST00000245663.9	full-splice_match	1	0	0	5231	1767	201	3263	0.588033	0.637033	0.792079	0.548881	0.0102041	0.0170068	0.0680272	0.0085034	0.037415	0.0340136	0.0680272	0.0238095	0.0544218	0.0867347	0.0935374	0.0238095	0.00170068	0.0408163	0.0459184	0.00170068	0.0408163	0.0612245	0.0969388	0.042517	0.0595238	0.0442177	0.0578231	0.0646259	0.0561224	0.0595238	0.079932	0.0408163	0.0170068	0.0544218	0.0918367	0.0255102	0.0510204	0.0646259	0.0952381	0.0289116
PSD4	ENST00000245796.11	full-splice_match	1	0	0	11342	3168	195	7979	0.540469	0.607831	0.581633	0.512721	0.0132701	0.0350711	0.0511848	0.0170616	0.042654	0.064455	0.0265403	0.0341232	0.0777251	0.0900474	0.0796209	0.0303318	0.0028436	0.0350711	0.036019	0.0123223	0.0341232	0.0616114	0.106161	0.0341232	0.0890995	0.0758294	0.0350711	0.0985782	0.0170616	0.0312796	0.0322275	0.0151659	0.0236967	0.0635071	0.119431	0.0464455	0.0625592	0.0511848	0.107109	0.0303318
TNFSF9	ENST00000245817.5	full-splice_match	1	0	0	1634	762	11	861	0.570379	0.689882	0.5	0.465738	0.0118577	0.00790514	0.0158103	0.0118577	0.0197628	0.0434783	0.0237154	0.0434783	0.0118577	0.0474308	0.0592885	0.0158103	0.00395257	0.0158103	0.0197628	0	0.0158103	0.0434783	0.0592885	0.0118577	0.055336	0.083004	0.118577	0.102767	0.0474308	0.110672	0.0632411	0.0355731	0.0158103	0.0750988	0.158103	0.0632411	0.0237154	0.0513834	0.055336	0.0118577
THOC2	ENST00000245838.13	full-splice_match	1	0	0	5600	4779	30	791	0.383214	0.392005	0.516129	0.324905	0.124372	0.0452261	0.11495	0.0778894	0.0634422	0.0288945	0.0100503	0.035804	0.0961055	0.0496231	0.0496231	0.0527638	0.0464824	0.0546482	0.0722362	0.0615578	0.0772613	0.0295226	0.0603015	0.0565327	0.048995	0.0119347	0.00690955	0.031407	0.0119347	0.00753769	0.0106784	0.00502513	0.0326633	0.0295226	0.0452261	0.0515075	0.111809	0.0301508	0.0559045	0.053392
RPL23	ENST00000245857.9	full-splice_match	1	0	0	588	243	291	54	0.454082	0.458678	0.5	0.185185	0.1125	0.0375	0.1125	0.0375	0.0625	0.0375	0.0125	0.0125	0.1	0.05	0.0875	0.0875	0.05	0.025	0.0625	0.0625	0.075	0.0125	0.125	0.0875	0.075	0.0125	0.025	0	0.0375	0	0.0125	0.025	0	0.0125	0.025	0.025	0.0875	0.0375	0.05	0.0625
STRADA	ENST00000245865.10	full-splice_match	1	0	0	2959	702	210	2047	0.541399	0.507846	0.436019	0.563752	0.0257511	0.0386266	0.0600858	0.0300429	0.0643777	0.0343348	0.0300429	0.0386266	0.0300429	0.0772532	0.0815451	0.0343348	0.0300429	0.055794	0.0815451	0.0343348	0.0686695	0.0472103	0.0772532	0.0815451	0.0901288	0.0257511	0.00858369	0.0472103	0.0343348	0.00429185	0.0214592	0.0128755	0.0257511	0.0429185	0.0944206	0.0343348	0.0386266	0.0300429	0.0643777	0.0643777
C3	ENST00000245907.11	full-splice_match	1	0	0	5231	4989	61	181	0.564519	0.564354	0.629032	0.546961	0.0276775	0.0463297	0.0746089	0.0204573	0.0511432	0.078219	0.0336943	0.0391095	0.0697954	0.0607702	0.0740072	0.0336943	0.011432	0.0451264	0.0421179	0.0162455	0.0577617	0.0529483	0.0944645	0.0487365	0.0842359	0.0517449	0.0427196	0.0697954	0.0294826	0.0240674	0.0421179	0.0312876	0.0354994	0.0505415	0.0830325	0.0379061	0.0703971	0.0625752	0.0679904	0.0336943
SH2D3A	ENST00000245908.11	full-splice_match	1	0	0	2281	1728	117	436	0.630864	0.658367	0.644068	0.518349	0.00521739	0.026087	0.0365217	0.00869565	0.0347826	0.0521739	0.0226087	0.026087	0.0365217	0.0765217	0.08	0.0226087	0.0121739	0.0156522	0.0417391	0.0104348	0.0295652	0.0521739	0.08	0.0313043	0.0747826	0.0834783	0.066087	0.0886957	0.0365217	0.0643478	0.0556522	0.0226087	0.00521739	0.0556522	0.144348	0.0313043	0.04	0.0434783	0.0904348	0.0313043
RTN2	ENST00000245923.9	full-splice_match	1	0	0	2274	1635	222	417	0.631486	0.604651	0.825112	0.633094	0.0202206	0.0238971	0.0514706	0.0220588	0.0330882	0.0661765	0.0349265	0.0404412	0.0551471	0.0827206	0.0514706	0.0257353	0.00551471	0.0441176	0.0165441	0.03125	0.0367647	0.0588235	0.0827206	0.03125	0.0827206	0.0716912	0.0698529	0.0827206	0.0441176	0.0349265	0.0551471	0.0202206	0.0220588	0.0919118	0.0882353	0.0386029	0.0533088	0.0698529	0.0643382	0.0367647
CFAP61	ENST00000245957.10	full-splice_match	1	0	0	4098	3711	96	291	0.481454	0.480593	0.57732	0.460481	0.0461165	0.0501618	0.0606796	0.0469256	0.0542071	0.0622977	0.0250809	0.0533981	0.0533981	0.0558252	0.0485437	0.0412621	0.0364078	0.052589	0.0542071	0.0453074	0.0631068	0.0598706	0.065534	0.065534	0.0817152	0.0420712	0.0315534	0.0606796	0.0250809	0.0177994	0.0194175	0.0234628	0.0347896	0.0542071	0.0639159	0.0558252	0.0687702	0.039644	0.0517799	0.0412621
CDC25B	ENST00000245960.10	full-splice_match	1	0	0	3119	1740	222	1157	0.590574	0.60322	0.766816	0.537597	0.0207254	0.0276339	0.0587219	0.0138169	0.0310881	0.0621762	0.029361	0.0276339	0.0639033	0.0829016	0.0690846	0.0345423	0.0103627	0.0414508	0.0518135	0.0189983	0.0310881	0.0379965	0.100173	0.0483592	0.0759931	0.0794473	0.0639033	0.0880829	0.0345423	0.0397237	0.0621762	0.0259067	0.029361	0.074266	0.0777202	0.0310881	0.0587219	0.0639033	0.0759931	0.0466321
AP5S1	ENST00000246041.6	full-splice_match	1	0	0	1960	600	347	1013	0.595918	0.629382	0.675287	0.548865	0	0.0201005	0.0251256	0.0201005	0.0301508	0.0603015	0.0502513	0.0150754	0.040201	0.0502513	0.0753769	0.0301508	0.00502513	0.0150754	0.040201	0.0201005	0.0251256	0.0703518	0.0854271	0.040201	0.0703518	0.0552764	0.0753769	0.105528	0.0251256	0.0603015	0.0552764	0.0201005	0.00502513	0.0552764	0.135678	0.0653266	0.040201	0.0452261	0.0703518	0.0201005
RRBP1	ENST00000246043.8	full-splice_match	1	0	0	4737	4230	0	507	0.58898	0.593757	0	0.550296	0.0596167	0.0468417	0.123492	0.0170334	0.0312278	0.046132	0.0227111	0.0184528	0.121363	0.0887154	0.166075	0.0269695	0.00425834	0.0227111	0.0234209	0.0106458	0.0731015	0.0312278	0.1533	0.020582	0.108588	0.0525195	0.033357	0.0354862	0.0340667	0.0241306	0.0312278	0.00780696	0.00851668	0.0475515	0.0652945	0.0134847	0.109297	0.0290987	0.118524	0.020582
TCF15	ENST00000246080.4	full-splice_match	1	0	0	1006	597	72	337	0.693837	0.758389	0.863014	0.543027	0	0.0252525	0.0252525	0	0.0151515	0.0555556	0.0656566	0.010101	0.030303	0.0707071	0.0505051	0.010101	0	0.020202	0	0	0.0353535	0.0454545	0.0606061	0.0151515	0.0555556	0.0505051	0.121212	0.0353535	0.0656566	0.116162	0.171717	0.0808081	0.00505051	0.0252525	0.0909091	0.0252525	0.0151515	0.0656566	0.0707071	0.00505051
FAM110A	ENST00000246100.3	full-splice_match	1	0	0	1619	885	144	590	0.633725	0.707014	0.517241	0.552542	0.00680272	0.0170068	0.0272109	0.00340136	0.0238095	0.0408163	0.0340136	0.0204082	0.0170068	0.115646	0.0544218	0.0204082	0.00340136	0.0204082	0.0136054	0	0.0306122	0.0340136	0.085034	0.0102041	0.0646259	0.122449	0.142857	0.108844	0.037415	0.108844	0.085034	0.0340136	0.0204082	0.0612245	0.115646	0.0238095	0.0102041	0.047619	0.0816327	0.0136054
SCRT2	ENST00000246104.7	full-splice_match	1	0	0	3200	921	201	2078	0.661563	0.73587	0.811881	0.614052	0.0163399	0.0130719	0.0555556	0.00326797	0.0424837	0.0686275	0.0555556	0.0196078	0.0294118	0.0718954	0.0359477	0.0261438	0	0.00653595	0.0228758	0	0.0522876	0.0686275	0.0588235	0.0196078	0.0555556	0.0555556	0.120915	0.0816993	0.0555556	0.147059	0.150327	0.0294118	0.0294118	0.0457516	0.0718954	0.0326797	0.0163399	0.0620915	0.0490196	0.00653595
TLE6	ENST00000246112.9	full-splice_match	1	0	0	1977	1716	83	178	0.594335	0.594752	0.559524	0.606742	0.0227671	0.0315236	0.056042	0.0122592	0.0525394	0.0630473	0.0227671	0.028021	0.0577933	0.0788091	0.084063	0.0350263	0.00700525	0.0350263	0.0385289	0.0122592	0.061296	0.0507881	0.119089	0.033275	0.0875657	0.0472855	0.028021	0.101576	0.0175131	0.0210158	0.0402802	0.0297723	0.0157618	0.061296	0.108581	0.0297723	0.0350263	0.0665499	0.0735552	0.0385289
ANKHD1	ENST00000246149.10	full-splice_match	1	0	0	2062	2062	0	0	0.448594	0.448811	0	0	0.0641088	0.0451676	0.077222	0.0655658	0.0670228	0.0320544	0.0116561	0.0393395	0.0699369	0.0553667	0.0713939	0.0422535	0.0466246	0.0349684	0.0757649	0.0437105	0.0670228	0.0422535	0.08305	0.0553667	0.0393395	0.0189412	0.00728509	0.0437105	0.0131132	0.00874211	0.0101991	0.00582807	0.0247693	0.0393395	0.081593	0.0539097	0.0743079	0.0349684	0.0553667	0.0539097
ARMCX5	ENST00000246174.6	full-splice_match	1	0	0	2899	1674	881	344	0.439117	0.427974	0.513605	0.302326	0.0843806	0.0466786	0.113106	0.0628366	0.0466786	0.0466786	0.00718133	0.05386	0.0736086	0.037702	0.0754039	0.0754039	0.05386	0.043088	0.0520646	0.0520646	0.0861759	0.032316	0.0664273	0.0341113	0.0664273	0.0287253	0.00718133	0.0664273	0.010772	0.00359066	0	0.00359066	0.0448833	0.0251346	0.0682226	0.043088	0.0771993	0.0412926	0.0556553	0.0502693
MMP24	ENST00000246186.8	full-splice_match	1	0	0	4376	1935	49	2392	0.603748	0.619442	0.92	0.584448	0.0217391	0.0372671	0.0574534	0.00465839	0.0481366	0.0559006	0.0310559	0.0388199	0.0372671	0.0636646	0.0745342	0.0248447	0.00776398	0.0481366	0.0434783	0.015528	0.0434783	0.0512422	0.0745342	0.052795	0.0791925	0.068323	0.0667702	0.0621118	0.0357143	0.0574534	0.076087	0.0170807	0.0419255	0.0341615	0.0885093	0.0326087	0.0450311	0.0574534	0.0621118	0.0372671
NECAB3	ENST00000246190.11	full-splice_match	1	0	0	2009	1188	76	745	0.632155	0.642797	0.766234	0.601342	0.00759494	0.0202532	0.0329114	0.0177215	0.0303797	0.0632911	0.0177215	0.0253165	0.0632911	0.0734177	0.0911392	0.0227848	0.00759494	0.0202532	0.0455696	0.0177215	0.0253165	0.0531646	0.129114	0.0379747	0.0936709	0.0810127	0.0683544	0.078481	0.0253165	0.0506329	0.0556962	0.0202532	0.00759494	0.0683544	0.103797	0.0303797	0.0405063	0.0531646	0.0835443	0.0278481
AGO3	ENST00000246314.10	full-splice_match	1	0	0	3211	1878	613	720	0.443787	0.445924	0.560261	0.338889	0.0512	0.0544	0.0784	0.048	0.0784	0.0496	0.0176	0.048	0.0832	0.048	0.0512	0.056	0.0448	0.0528	0.0672	0.0512	0.072	0.0496	0.0944	0.048	0.0608	0.0128	0.0128	0.0432	0.016	0.0112	0.0224	0.0176	0.0304	0.0336	0.0608	0.0464	0.072	0.0416	0.0464	0.056
KLC1	ENST00000246489.11	full-splice_match	1	0	0	2294	1911	255	128	0.532258	0.493194	0.757812	0.664062	0.0801887	0.0534591	0.111635	0.0471698	0.0597484	0.0361635	0.0377358	0.0361635	0.0990566	0.0691824	0.0613208	0.0550314	0.0172956	0.0361635	0.0676101	0.0251572	0.0738994	0.0393082	0.072327	0.0283019	0.0455975	0.0251572	0.0204403	0.0455975	0.0267296	0.0204403	0.0235849	0.0267296	0.0220126	0.0298742	0.0833333	0.0345912	0.106918	0.0487421	0.0849057	0.0471698
PCID2	ENST00000246505.9	full-splice_match	1	0	0	1786	1359	35	392	0.450728	0.467599	0.75	0.364796	0.0553097	0.050885	0.0774336	0.0287611	0.0641593	0.0464602	0.0243363	0.0376106	0.0641593	0.0730088	0.039823	0.0619469	0.0243363	0.039823	0.0575221	0.0486726	0.0486726	0.0442478	0.090708	0.0774336	0.0442478	0.0221239	0.0132743	0.0486726	0.0287611	0.0154867	0.0110619	0.0176991	0.0243363	0.0331858	0.0840708	0.0553097	0.0752212	0.0420354	0.0553097	0.0353982
LRFN3	ENST00000246529.4	full-splice_match	1	0	0	4690	1884	1198	1608	0.635394	0.69676	0.633862	0.564677	0	0.0334928	0.0111643	0.00637959	0.0414673	0.0781499	0.030303	0.0239234	0.0127592	0.062201	0.0366826	0.00956938	0	0.0318979	0.0255183	0.00478469	0.0414673	0.0701754	0.0637959	0.0287081	0.0829346	0.0988836	0.102073	0.110048	0.0366826	0.0988836	0.076555	0.0414673	0.0175439	0.0653907	0.15949	0.0255183	0.00637959	0.0542265	0.0382775	0.0239234
IGFLR1	ENST00000246532.6	full-splice_match	1	0	0	1647	1065	100	482	0.599271	0.644737	0.623762	0.493776	0.0112994	0.0310734	0.0338983	0.00847458	0.0282486	0.0536723	0.0169492	0.039548	0.0282486	0.0621469	0.0480226	0.0254237	0.00847458	0.0169492	0.0310734	0.0225989	0.0367232	0.0451977	0.059322	0.019774	0.059322	0.0932203	0.0564972	0.141243	0.0254237	0.0621469	0.059322	0.0169492	0.0282486	0.0762712	0.163842	0.0367232	0.0338983	0.0423729	0.059322	0.0282486
PRRG2	ENST00000246794.10	full-splice_match	1	0	0	1403	606	179	618	0.607983	0.621488	0.588889	0.600324	0.00497512	0.0298507	0.0348259	0.00497512	0.0497512	0.0995025	0.0298507	0.0149254	0.0497512	0.0746269	0.0845771	0.0348259	0.0149254	0.0149254	0.0199005	0.0248756	0.0348259	0.0895522	0.079602	0.0298507	0.114428	0.0845771	0.0248756	0.129353	0.0248756	0.0248756	0.0248756	0.00497512	0.0248756	0.0646766	0.134328	0.0298507	0.0298507	0.0447761	0.114428	0.0149254
FLRT1	ENST00000246841.3	full-splice_match	1	0	0	3949	2022	1043	884	0.594834	0.63236	0.604406	0.497738	0.00742942	0.0520059	0.0371471	0.0104012	0.0609212	0.10104	0.0564636	0.0267459	0.0430906	0.0549777	0.0490342	0.0118871	0.00742942	0.0475483	0.0416048	0.0089153	0.0713224	0.0802377	0.0742942	0.063893	0.118871	0.063893	0.0564636	0.10104	0.0237741	0.0624071	0.0624071	0.0237741	0.0297177	0.0579495	0.124814	0.0178306	0.02526	0.0728083	0.0445765	0.0222883
WNK4	ENST00000246914.10	full-splice_match	1	0	0	4199	3729	89	381	0.609193	0.61883	0.666667	0.501312	0.0169082	0.020934	0.0483092	0.010467	0.0305958	0.0563607	0.0241546	0.0330113	0.0563607	0.0877617	0.0628019	0.0322061	0.00483092	0.0297907	0.0338164	0.0201288	0.0281804	0.0531401	0.0933977	0.0378422	0.0917874	0.0942029	0.0628019	0.0925926	0.0330113	0.037037	0.0523349	0.0217391	0.0225443	0.089372	0.0829308	0.0466989	0.0466989	0.047504	0.0869565	0.0330113
DNASE1	ENST00000246949.10	full-splice_match	1	0	0	1346	846	355	145	0.551263	0.591716	0.477528	0.496552	0.00355872	0.024911	0.0320285	0.0142349	0.0640569	0.0604982	0.0320285	0.0462633	0.0427046	0.0676157	0.0604982	0.0284698	0.00355872	0.0462633	0.0676157	0.0142349	0.0391459	0.0569395	0.106762	0.0427046	0.088968	0.0569395	0.0427046	0.0782918	0.0355872	0.0391459	0.0320285	0.0320285	0.0604982	0.0284698	0.11032	0.0320285	0.024911	0.0854093	0.0640569	0.0462633
AHDC1	ENST00000247087.10	full-splice_match	1	0	0	6335	4809	598	928	0.640095	0.666389	0.691152	0.470905	0.0118602	0.0224719	0.0474407	0.00374532	0.0349563	0.0692884	0.0318352	0.0374532	0.0324594	0.0955056	0.056804	0.0330836	0.00436954	0.0187266	0.0218477	0.0062422	0.0424469	0.0705368	0.104869	0.0249688	0.11236	0.110487	0.0742821	0.105493	0.0287141	0.0543071	0.0705368	0.0174782	0.0268414	0.0617978	0.109238	0.0399501	0.0268414	0.056804	0.0536829	0.0124844
SLC35A2	ENST00000247138.11	full-splice_match	1	0	0	1456	1188	10	258	0.603709	0.616681	0.454545	0.550388	0.0101266	0.0177215	0.0405063	0.0101266	0.0303797	0.0708861	0.0202532	0.0253165	0.0227848	0.0607595	0.0481013	0.0227848	0.0126582	0.0278481	0.0151899	0.0177215	0.0329114	0.0759494	0.0860759	0.043038	0.0911392	0.0455696	0.0582278	0.116456	0.00253165	0.0582278	0.0455696	0.035443	0.0227848	0.106329	0.124051	0.0506329	0.0278481	0.0227848	0.0227848	0.00759494
ATG14	ENST00000247178.6	full-splice_match	1	0	0	4715	1476	8	3231	0.445175	0.504407	0.555556	0.417827	0.0610998	0.0448065	0.0814664	0.0529532	0.0509165	0.0570265	0.0203666	0.0386965	0.089613	0.0753564	0.0529532	0.0448065	0.0183299	0.0366599	0.0529532	0.0386965	0.0590631	0.0305499	0.0855397	0.0325866	0.0427699	0.0468432	0.0346232	0.0590631	0.0366599	0.0264766	0.0366599	0.0183299	0.0264766	0.0468432	0.0773931	0.0407332	0.0855397	0.0549898	0.0794297	0.0448065
HSPA2	ENST00000247207.7	full-splice_match	1	0	0	2497	1917	109	471	0.549459	0.602818	0.581818	0.324841	0.0266458	0.0470219	0.0799373	0.0203762	0.0501567	0.0846395	0.0548589	0.0219436	0.0642633	0.0579937	0.0768025	0.0219436	0.0109718	0.0673981	0.0329154	0.015674	0.0940439	0.0595611	0.0532915	0.0548589	0.0909091	0.0360502	0.0407524	0.0564263	0.0736677	0.0658307	0.0815047	0.0282132	0.0203762	0.0344828	0.0548589	0.0282132	0.0470219	0.0830721	0.0877743	0.0344828
SGPP1	ENST00000247225.7	full-splice_match	1	0	0	3336	1323	121	1892	0.405875	0.547655	0.737705	0.285412	0.0181818	0.0295455	0.0295455	0.0272727	0.0363636	0.0454545	0.0136364	0.0386364	0.0272727	0.0545455	0.0386364	0.025	0.0318182	0.0522727	0.0477273	0.0568182	0.0363636	0.0318182	0.0409091	0.0704545	0.05	0.05	0.0681818	0.0704545	0.0227273	0.0613636	0.0613636	0.0159091	0.0340909	0.0636364	0.0931818	0.0545455	0.0363636	0.0363636	0.0522727	0.0386364
PLEKHG3	ENST00000247226.13	full-splice_match	1	0	0	10526	3657	320	6549	0.586358	0.61023	0.753894	0.564819	0.0188834	0.0279146	0.0665025	0.0180624	0.047619	0.0607553	0.0114943	0.0287356	0.0689655	0.1133	0.090312	0.0336617	0.00328407	0.0279146	0.0394089	0.0172414	0.0517241	0.0541872	0.127258	0.0353038	0.104269	0.0738916	0.0525452	0.0738916	0.0180624	0.0279146	0.046798	0.0221675	0.0155993	0.0615764	0.08867	0.0328407	0.0566502	0.047619	0.10509	0.0238095
HELB	ENST00000247815.9	full-splice_match	1	0	0	3472	3261	111	100	0.418491	0.419632	0.508929	0.28	0.0791897	0.0478821	0.0828729	0.0736648	0.058011	0.0414365	0.0110497	0.0515654	0.0828729	0.0405157	0.0469613	0.0524862	0.038674	0.0423573	0.0764273	0.0607735	0.0626151	0.038674	0.0644567	0.0441989	0.0488029	0.0110497	0.0184162	0.0432781	0.0184162	0.0128913	0.00828729	0.014733	0.0349908	0.0395948	0.0561694	0.0543278	0.0856354	0.0497238	0.0543278	0.0635359
RAB3IP	ENST00000247833.12	full-splice_match	1	0	0	9333	1380	197	7756	0.399871	0.419869	0.676768	0.389247	0.0740741	0.0544662	0.0936819	0.0501089	0.0675381	0.0392157	0.0108932	0.0544662	0.0762527	0.0610022	0.0631808	0.0544662	0.037037	0.0413943	0.0566449	0.0588235	0.0631808	0.0326797	0.0936819	0.0392157	0.037037	0.0174292	0.0108932	0.043573	0.0130719	0.0043573	0.0108932	0.0108932	0.0501089	0.043573	0.043573	0.0631808	0.087146	0.037037	0.0522876	0.0501089
TAS2R4	ENST00000247881.4	full-splice_match	1	0	0	5018	897	1815	2306	0.397967	0.416295	0.398678	0.390286	0.0469799	0.0302013	0.033557	0.0503356	0.0436242	0.0302013	0.0134228	0.0536913	0.0369128	0.0302013	0.0369128	0.033557	0.0369128	0.0704698	0.0402685	0.0805369	0.0369128	0.0402685	0.0637584	0.0738255	0.057047	0.0201342	0	0.0604027	0.00671141	0.0033557	0.0134228	0.0033557	0.0436242	0.0637584	0.0973154	0.0872483	0.057047	0.0302013	0.0201342	0.0369128
TAS2R5	ENST00000247883.5	full-splice_match	1	0	0	1151	897	145	109	0.483927	0.485491	0.520548	0.422018	0.0167785	0.0167785	0.0604027	0.0302013	0.0268456	0.0302013	0.0033557	0.0402685	0.0503356	0.0536913	0.033557	0.0436242	0.0201342	0.0704698	0.0402685	0.0637584	0.0302013	0.0369128	0.0738255	0.057047	0.0503356	0.0167785	0.0134228	0.104027	0.0100671	0.0134228	0.0167785	0.0033557	0.0302013	0.0671141	0.110738	0.0973154	0.0536913	0.0234899	0.0302013	0.0503356
ZNF777	ENST00000247930.5	full-splice_match	1	0	0	3172	2493	263	416	0.623581	0.617175	0.670455	0.632212	0.0216867	0.0409639	0.0759036	0.00963855	0.0481928	0.0674699	0.0361446	0.0289157	0.0783133	0.0927711	0.0626506	0.0421687	0.00240964	0.0325301	0.0337349	0.00722892	0.060241	0.0771084	0.0927711	0.0301205	0.0879518	0.086747	0.053012	0.0650602	0.0445783	0.060241	0.053012	0.0228916	0.0144578	0.0493976	0.0927711	0.0373494	0.0638554	0.0433735	0.106024	0.0301205
IDUA	ENST00000247933.9	full-splice_match	1	0	0	2186	1959	88	139	0.677493	0.687436	0.741573	0.496403	0	0.0276074	0.0260736	0.00460123	0.0368098	0.0751534	0.0521472	0.0306748	0.0184049	0.0644172	0.0582822	0.0153374	0.00306748	0.0214724	0.0214724	0.00153374	0.0368098	0.0644172	0.0766871	0.0276074	0.0828221	0.0935583	0.0904908	0.0858896	0.0352761	0.105828	0.0797546	0.0306748	0.0214724	0.0521472	0.119632	0.0383436	0.0199387	0.0659509	0.0521472	0.0138037
SIN3B	ENST00000248054.10	full-splice_match	1	0	0	5038	3390	23	1625	0.606391	0.612275	0.708333	0.592615	0.0177148	0.0301151	0.0673162	0.0106289	0.0398583	0.0690877	0.0434012	0.023915	0.0682019	0.0947741	0.0797166	0.0310009	0.00708592	0.0301151	0.0265722	0.0150576	0.0425155	0.0531444	0.0992028	0.0327724	0.0744021	0.0522586	0.064659	0.0726306	0.040744	0.0620018	0.0540301	0.0310009	0.0212578	0.0496014	0.0974314	0.0327724	0.0602303	0.0637733	0.0956599	0.0256864
UNKL	ENST00000248104.11	full-splice_match	1	0	0	4320	687	595	3038	0.56412	0.674927	0.67953	0.516458	0.00438596	0.00877193	0.0482456	0.00438596	0.0219298	0.0350877	0.0263158	0.0219298	0.0307018	0.105263	0.0964912	0.0438596	0.00438596	0.0307018	0.00877193	0.00438596	0.0307018	0.0482456	0.109649	0.0263158	0.0701754	0.0657895	0.0701754	0.0789474	0.0350877	0.0438596	0.0833333	0.0219298	0.00438596	0.0438596	0.149123	0.0175439	0.0307018	0.0394737	0.105263	0.0175439
RAB40C	ENST00000248139.8	full-splice_match	1	0	0	2718	843	226	1649	0.653054	0.631829	0.859031	0.635537	0.00357143	0.0428571	0.0571429	0	0.025	0.0678571	0.0571429	0.0321429	0.0535714	0.0607143	0.0535714	0.0357143	0	0.0678571	0.0357143	0	0.0642857	0.0571429	0.075	0.0571429	0.0678571	0.05	0.0678571	0.0821429	0.0428571	0.0428571	0.0928571	0.0428571	0.025	0.0571429	0.0892857	0.0392857	0.0285714	0.0535714	0.0714286	0.0392857
ZNF10	ENST00000248211.11	full-splice_match	1	0	0	4406	1719	187	2500	0.383795	0.416182	0.526596	0.3508	0.0786713	0.0454545	0.0629371	0.0821678	0.0559441	0.0524476	0.00174825	0.0541958	0.0926573	0.041958	0.0384615	0.0541958	0.0437063	0.0611888	0.0804196	0.0524476	0.041958	0.0402098	0.0751748	0.0804196	0.0367133	0.0262238	0.00699301	0.0524476	0.00174825	0.0034965	0.00699301	0.0034965	0.0314685	0.0437063	0.0611888	0.0576923	0.0979021	0.041958	0.0751748	0.0297203
TICAM1	ENST00000248244.6	full-splice_match	1	0	0	2684	2136	238	310	0.63003	0.639344	0.682008	0.525806	0.0154712	0.0379747	0.0295359	0.00843882	0.0393812	0.0773558	0.0295359	0.0365682	0.0421941	0.0872011	0.0745429	0.0126582	0.00703235	0.0309423	0.0281294	0.0140647	0.0323488	0.0773558	0.120956	0.0393812	0.132208	0.108298	0.0506329	0.11955	0.0295359	0.0464135	0.0407876	0.00703235	0.02391	0.0773558	0.0998594	0.0464135	0.0436006	0.0464135	0.0576653	0.0253165
MON1B	ENST00000248248.8	full-splice_match	1	0	0	5813	1641	79	4093	0.494925	0.627439	0.5125	0.441485	0.00915751	0.014652	0.03663	0.0128205	0.040293	0.0714286	0.025641	0.03663	0.0347985	0.0787546	0.0659341	0.040293	0.00915751	0.0201465	0.0421245	0.00549451	0.0311355	0.0641026	0.0860806	0.0347985	0.0897436	0.0750916	0.0531136	0.0934066	0.0201465	0.0641026	0.0494505	0.0238095	0.032967	0.0512821	0.128205	0.03663	0.0238095	0.0586081	0.0787546	0.0164835
CACTIN	ENST00000248420.9	full-splice_match	1	0	0	2671	2274	53	344	0.649195	0.66256	0.703704	0.552326	0.00396301	0.0303831	0.0660502	0.00396301	0.0462351	0.0462351	0.0568032	0.0198151	0.0568032	0.107001	0.10568	0.0237781	0.00660502	0.0356671	0.0290621	0.00264201	0.0620872	0.0462351	0.0924703	0.0369881	0.0713342	0.0383091	0.0713342	0.0501982	0.0594452	0.0845443	0.0964333	0.0211361	0.015852	0.0435931	0.0752972	0.0277411	0.0369881	0.0647292	0.129458	0.0303831
VIL1	ENST00000248444.10	full-splice_match	1	0	0	6500	2481	57	3962	0.443692	0.567339	0.586207	0.36421	0.0205811	0.0411622	0.0847458	0.0193705	0.0460048	0.0641646	0.0217918	0.0423729	0.0605327	0.0762712	0.0932203	0.027845	0.00242131	0.0435835	0.0653753	0.0157385	0.0738499	0.0520581	0.0823245	0.0435835	0.094431	0.0387409	0.0302663	0.0690073	0.0254237	0.0145278	0.0290557	0.0193705	0.0363196	0.0435835	0.0835351	0.0435835	0.0677966	0.0544794	0.0774818	0.0460048
TNFRSF19	ENST00000248484.9	full-splice_match	1	0	0	4438	1251	471	2716	0.429247	0.5272	0.427966	0.384389	0.0288462	0.0504808	0.0480769	0.0240385	0.0432692	0.0288462	0.03125	0.0600962	0.0745192	0.0528846	0.0504808	0.0480769	0.00961538	0.0456731	0.0408654	0.0336538	0.0456731	0.0432692	0.115385	0.0432692	0.0745192	0.0360577	0.0264423	0.0504808	0.0144231	0.0240385	0.0360577	0.0240385	0.0288462	0.0649038	0.0961538	0.0504808	0.0625	0.0552885	0.0432692	0.0360577
PTPN12	ENST00000248594.11	full-splice_match	1	0	0	3384	2340	252	792	0.405437	0.399316	0.774704	0.305556	0.0872914	0.0731707	0.0795892	0.0872914	0.0783055	0.0474968	0.00641849	0.0577664	0.0962773	0.0359435	0.0474968	0.0436457	0.0603338	0.0474968	0.0731707	0.0693196	0.0757381	0.0487805	0.0770218	0.0577664	0.071887	0.0192555	0.00770218	0.0449294	0.00641849	0.00513479	0.00770218	0.00770218	0.0359435	0.0359435	0.0487805	0.042362	0.112965	0.0397946	0.0410783	0.0616175
STYXL1	ENST00000248600.5	full-splice_match	1	0	0	1415	939	343	133	0.532862	0.485075	0.65407	0.556391	0.0448718	0.0416667	0.0673077	0.0384615	0.0512821	0.0544872	0.0128205	0.0352564	0.0705128	0.0544872	0.0384615	0.0320513	0.0288462	0.0705128	0.0865385	0.0480769	0.0641026	0.0480769	0.0769231	0.0737179	0.0833333	0.0512821	0.0320513	0.0641026	0.0128205	0.0192308	0.0160256	0.0192308	0.0224359	0.0448718	0.0673077	0.0641026	0.0673077	0.0352564	0.0416667	0.0865385
PEX1	ENST00000248633.9	full-splice_match	1	0	0	4369	3849	85	435	0.416114	0.427235	0.744186	0.252874	0.0772231	0.0483619	0.0772231	0.0655226	0.0538222	0.0374415	0.00936037	0.0546022	0.0725429	0.0530421	0.0405616	0.0631825	0.0429017	0.0429017	0.0639626	0.0546022	0.0725429	0.025741	0.0702028	0.049142	0.0530421	0.0140406	0.00858034	0.0546022	0.0148206	0.00780031	0.0117005	0.00780031	0.0304212	0.0475819	0.075663	0.0585023	0.0819033	0.0452418	0.0546022	0.049922
LRFN1	ENST00000248668.5	full-splice_match	1	0	0	3579	2313	196	1070	0.665549	0.689014	0.685279	0.611215	0.00649351	0.0337662	0.012987	0.00519481	0.0363636	0.0844156	0.0363636	0.025974	0.0181818	0.0454545	0.0558442	0.0181818	0.0038961	0.0350649	0.0233766	0.00519481	0.0311688	0.0623377	0.0584416	0.0324675	0.0753247	0.0649351	0.123377	0.0896104	0.0454545	0.105195	0.0987013	0.0415584	0.0181818	0.0662338	0.109091	0.0337662	0.0168831	0.0649351	0.0623377	0.0233766
TUBGCP6	ENST00000248846.10	full-splice_match	1	0	0	6066	5457	564	45	0.615068	0.61272	0.640708	0.577778	0.0110011	0.0319032	0.0407041	0.00825083	0.0462046	0.0555556	0.0434543	0.0346535	0.0484048	0.0841584	0.0748075	0.0313531	0.00220022	0.0225523	0.0352035	0.0148515	0.0352035	0.070407	0.106161	0.0385039	0.0830583	0.0687569	0.0462046	0.0676568	0.0247525	0.0335534	0.0456546	0.040154	0.0165017	0.0649065	0.105061	0.0385039	0.0418042	0.0506051	0.0858086	0.0214521
SEZ6L	ENST00000248933.11	full-splice_match	1	0	0	6584	3072	208	3304	0.505468	0.587756	0.799043	0.410412	0.0215054	0.0371457	0.0410557	0.0215054	0.0527859	0.0772239	0.0244379	0.0459433	0.0518084	0.0625611	0.058651	0.0351906	0.00782014	0.054741	0.0420332	0.0166178	0.0400782	0.0684262	0.0791789	0.0557185	0.0977517	0.083089	0.0518084	0.0889541	0.0332356	0.0293255	0.0410557	0.0166178	0.0322581	0.0625611	0.0967742	0.0410557	0.0518084	0.0606061	0.0772239	0.026393
VPREB3	ENST00000248948.4	full-splice_match	1	0	0	567	369	62	136	0.574956	0.608696	0.555556	0.492647	0	0.00819672	0.0245902	0.00819672	0.0245902	0.057377	0.0491803	0.0491803	0.0163934	0.0655738	0.057377	0.0491803	0.00819672	0.0409836	0.0327869	0.0245902	0.0327869	0.0655738	0.122951	0.0245902	0.0901639	0.0737705	0.0409836	0.114754	0.0327869	0.0245902	0.0655738	0.0163934	0.0409836	0.0901639	0.122951	0.0409836	0.00819672	0.0491803	0.0245902	0.0655738
A4GALT	ENST00000249005.3	full-splice_match	1	0	0	2019	1059	189	771	0.633977	0.637996	0.626316	0.63035	0.00852273	0.0369318	0.0397727	0.00852273	0.0198864	0.0767045	0.0568182	0.0454545	0.0369318	0.0426136	0.0454545	0.0227273	0.00284091	0.0397727	0.0340909	0.00284091	0.0426136	0.0852273	0.0539773	0.0482955	0.0909091	0.09375	0.0681818	0.0852273	0.0340909	0.0596591	0.0710227	0.0369318	0.0255682	0.0511364	0.130682	0.0454545	0.0397727	0.0482955	0.0511364	0.0170455
APOL2	ENST00000249066.10	full-splice_match	1	0	0	2685	1011	477	1197	0.529981	0.532673	0.558577	0.516291	0.0327381	0.0446429	0.0833333	0.0297619	0.0446429	0.0625	0.00892857	0.0327381	0.0565476	0.0952381	0.0922619	0.047619	0.00892857	0.0327381	0.0595238	0.0297619	0.0744048	0.0565476	0.0952381	0.0416667	0.0833333	0.0386905	0.0208333	0.0416667	0.0119048	0.0119048	0.0178571	0.0178571	0.00892857	0.0416667	0.0863095	0.047619	0.0714286	0.0297619	0.0952381	0.0446429
LIF	ENST00000249075.4	full-splice_match	1	0	0	3871	606	64	3201	0.570912	0.6	0.523077	0.566386	0.00497512	0.0746269	0.0646766	0.00995025	0.0547264	0.079602	0.0597015	0.0199005	0.039801	0.0746269	0.039801	0.0298507	0.0149254	0.0348259	0.039801	0.00995025	0.0945274	0.0746269	0.0746269	0.0497512	0.109453	0.0845771	0.039801	0.114428	0.00995025	0.0447761	0.039801	0.0348259	0.0149254	0.0646766	0.0895522	0.039801	0.0447761	0.039801	0.0348259	0.0199005
DNAJC2	ENST00000249270.11	full-splice_match	1	0	0	1846	1704	44	98	0.392741	0.392836	0.755556	0.22449	0.137566	0.0652557	0.186949	0.0599647	0.0687831	0.0229277	0.015873	0.037037	0.156966	0.0723104	0.0458554	0.0405644	0.047619	0.0335097	0.0599647	0.0493827	0.0899471	0.021164	0.0634921	0.0458554	0.037037	0.015873	0.00705467	0.026455	0.0141093	0.010582	0.0123457	0.00352734	0.0246914	0.026455	0.0529101	0.0458554	0.167549	0.0335097	0.0529101	0.0617284
VGF	ENST00000249330.3	full-splice_match	1	0	0	2551	1845	216	490	0.704822	0.715835	0.723502	0.655102	0.0114007	0.0162866	0.0407166	0.00814332	0.0179153	0.0390879	0.0407166	0.0162866	0.0553746	0.0863192	0.140065	0.014658	0.00162866	0.019544	0.00977199	0.0130293	0.0260586	0.0407166	0.0846906	0.0114007	0.0618893	0.0944625	0.120521	0.0602606	0.0553746	0.115635	0.118893	0.0260586	0.00814332	0.0618893	0.0586319	0.0179153	0.0374593	0.0456026	0.153094	0.0179153
STRIP2	ENST00000249344.7	full-splice_match	1	0	0	5116	2502	41	2573	0.450743	0.52579	0.642857	0.37466	0.0348139	0.0384154	0.0720288	0.0360144	0.0516206	0.057623	0.00720288	0.0444178	0.0792317	0.060024	0.0684274	0.0384154	0.0228091	0.0408163	0.062425	0.030012	0.0564226	0.0408163	0.0828331	0.0492197	0.0708283	0.0456182	0.0252101	0.0744298	0.0144058	0.0228091	0.0264106	0.00720288	0.0312125	0.062425	0.103241	0.0456182	0.0672269	0.0444178	0.0768307	0.0396158
LRRC4	ENST00000249363.4	full-splice_match	1	0	0	4195	1959	625	1611	0.526579	0.56333	0.674121	0.424581	0.0122699	0.0674847	0.0383436	0.0199387	0.0690184	0.0904908	0.0260736	0.0444785	0.0383436	0.0613497	0.0444785	0.0368098	0.0168712	0.0352761	0.0429448	0.0230061	0.0659509	0.0782209	0.0858896	0.0567485	0.0904908	0.0582822	0.0398773	0.095092	0.0184049	0.0337423	0.0352761	0.0168712	0.0245399	0.0812883	0.0935583	0.0521472	0.041411	0.0490798	0.0490798	0.0245399
SMO	ENST00000249373.8	full-splice_match	1	0	0	3977	2361	519	1097	0.621825	0.628814	0.734615	0.553327	0.00381679	0.0254453	0.0407125	0.0152672	0.024173	0.0585242	0.0229008	0.043257	0.0521628	0.062341	0.0508906	0.0216285	0.00508906	0.0330789	0.043257	0.0152672	0.0445293	0.0496183	0.06743	0.0445293	0.0788804	0.0737913	0.0534351	0.0928753	0.0267176	0.0445293	0.0559796	0.0267176	0.0216285	0.06743	0.138677	0.043257	0.0356234	0.0445293	0.0776081	0.0279898
OPN1SW	ENST00000249389.3	full-splice_match	1	0	0	1106	1035	13	58	0.526221	0.540619	0.285714	0.327586	0.0145349	0.0290698	0.0377907	0.0174419	0.0406977	0.0377907	0.0261628	0.0406977	0.0203488	0.0581395	0.0406977	0.0319767	0.0174419	0.0436047	0.0523256	0.0232558	0.0436047	0.0377907	0.0668605	0.0843023	0.0668605	0.0494186	0.0232558	0.0930233	0.00872093	0.0261628	0.0319767	0.0290698	0.0406977	0.0581395	0.110465	0.0988372	0.0290698	0.0203488	0.0377907	0.0203488
ARHGAP22	ENST00000249601.9	full-splice_match	1	0	0	2729	2094	277	358	0.620374	0.63784	0.586331	0.544693	0.025825	0.0344333	0.0573888	0.0143472	0.0430416	0.0487805	0.0229555	0.0344333	0.045911	0.0860832	0.0903874	0.0315638	0.0071736	0.0272597	0.0315638	0.0071736	0.0401722	0.0430416	0.10043	0.0301291	0.0688666	0.0774749	0.0746055	0.0746055	0.035868	0.0401722	0.0746055	0.0243902	0.0143472	0.061693	0.0961263	0.0229555	0.0602582	0.0530846	0.0875179	0.0215208
SLTM	ENST00000249736.11	full-splice_match	1	0	0	1373	1359	14	0	0.440641	0.440353	0.466667	0	0.10177	0.0353982	0.183628	0.0553097	0.050885	0.0243363	0.00442478	0.0442478	0.130531	0.0641593	0.0818584	0.0420354	0.0287611	0.050885	0.0774336	0.0376106	0.0730088	0.0221239	0.0486726	0.0464602	0.0287611	0.0132743	0.0199115	0.0265487	0.0221239	0.00884956	0.0243363	0.00663717	0.0376106	0.0486726	0.0685841	0.0221239	0.159292	0.039823	0.0663717	0.0730088
ALDH1A2	ENST00000249750.9	full-splice_match	1	0	0	3386	1554	61	1771	0.468104	0.495171	0.806452	0.432524	0.040619	0.040619	0.0851064	0.0464217	0.0483559	0.0251451	0.0174081	0.0464217	0.0870406	0.0560928	0.0638298	0.0541586	0.032882	0.0386847	0.0580271	0.0464217	0.073501	0.0309478	0.0870406	0.040619	0.0618956	0.0444874	0.0154739	0.0386847	0.0154739	0.0193424	0.0154739	0.0174081	0.0174081	0.0367505	0.065764	0.0560928	0.065764	0.0444874	0.0715667	0.0599613
VPS13C	ENST00000249837.7	full-splice_match	1	0	0	13300	11130	99	2071	0.389248	0.397161	0.72	0.330758	0.0808843	0.0466433	0.0868159	0.0757617	0.0609329	0.029388	0.00674036	0.0477218	0.082502	0.0415206	0.0458345	0.0590456	0.0455648	0.0466433	0.0679428	0.0808843	0.0657859	0.0269614	0.0768401	0.048261	0.0512267	0.015368	0.00593152	0.0417902	0.0115934	0.00458345	0.0056619	0.00458345	0.0296576	0.0304664	0.0628202	0.0625506	0.0919385	0.037746	0.0428687	0.0612025
ISLR	ENST00000249842.8	full-splice_match	1	0	0	2331	1284	318	729	0.607894	0.638348	0.61442	0.55144	0.00936768	0.030445	0.0257611	0.0187354	0.0351288	0.0655738	0.028103	0.0351288	0.028103	0.0772834	0.0562061	0.0187354	0.00468384	0.0421546	0.0327869	0.00702576	0.058548	0.0679157	0.088993	0.0398126	0.0749415	0.0608899	0.0679157	0.119438	0.028103	0.058548	0.0374707	0.0187354	0.0163934	0.0749415	0.147541	0.0468384	0.0163934	0.0468384	0.0608899	0.0210773
MBD4	ENST00000249910.5	full-splice_match	1	0	0	2470	1740	176	554	0.427126	0.415756	0.683616	0.380866	0.112263	0.0569948	0.126079	0.0604491	0.044905	0.0466321	0.0138169	0.0518135	0.1019	0.0518135	0.044905	0.0587219	0.0310881	0.044905	0.0604491	0.0431779	0.0794473	0.0328152	0.0621762	0.0379965	0.0431779	0.029361	0.0172712	0.0362694	0.015544	0.0138169	0.00863558	0.00863558	0.0259067	0.0379965	0.0621762	0.0535406	0.119171	0.044905	0.044905	0.0518135
COPB1	ENST00000249923.7	full-splice_match	1	0	0	3481	2859	301	321	0.407641	0.401679	0.602649	0.277259	0.0703782	0.052521	0.0798319	0.0787815	0.0535714	0.0315126	0.00945378	0.0556723	0.0966387	0.0483193	0.0336134	0.0409664	0.0378151	0.0493697	0.0882353	0.0787815	0.0577731	0.0241597	0.0661765	0.0567227	0.0409664	0.0147059	0.00735294	0.0472689	0.0136555	0.00630252	0.00315126	0.0147059	0.0430672	0.0315126	0.0766807	0.0588235	0.105042	0.0357143	0.0441176	0.0672269
TPH1	ENST00000250018.6	full-splice_match	1	0	0	5325	1332	563	3430	0.379531	0.409467	0.398936	0.364723	0.0677201	0.0609481	0.0970655	0.0541761	0.0496614	0.0474041	0.00677201	0.0541761	0.103837	0.03386	0.0383747	0.0474041	0.0383747	0.0541761	0.0677201	0.0564334	0.0812641	0.0248307	0.0519187	0.0496614	0.0654628	0.0316027	0.013544	0.0383747	0.013544	0.00451467	0.00677201	0.0158014	0.03386	0.0316027	0.0632054	0.0767494	0.0925508	0.0361174	0.0677201	0.0586907
E2F8	ENST00000250024.9	full-splice_match	1	0	0	3706	2601	507	598	0.447113	0.482692	0.462598	0.279264	0.0785219	0.051963	0.0831409	0.0577367	0.0531178	0.0669746	0.0184758	0.034642	0.0762125	0.0692841	0.0531178	0.0542725	0.0254042	0.0531178	0.0427252	0.034642	0.0819861	0.0542725	0.0923788	0.0369515	0.101617	0.0612009	0.0196305	0.0635104	0.0184758	0.0161663	0.0103926	0.0138568	0.02194	0.0554273	0.0669746	0.039261	0.0727483	0.0404157	0.0612009	0.0369515
AIPL1	ENST00000250087.9	full-splice_match	1	0	0	2783	963	95	1725	0.5318	0.607069	0.583333	0.486957	0.01875	0.028125	0.059375	0.015625	0.0375	0.06875	0.03125	0.021875	0.075	0.08125	0.103125	0.0375	0.00625	0.053125	0.053125	0.015625	0.03125	0.08125	0.096875	0.06875	0.109375	0.04375	0.05625	0.05	0.03125	0.0375	0.053125	0.025	0.01875	0.046875	0.096875	0.015625	0.06875	0.021875	0.1375	0.0375
ILF3	ENST00000250241.12	full-splice_match	1	0	0	3035	2070	69	896	0.519275	0.577574	0.3	0.401786	0.0406386	0.0391872	0.0885341	0.0203193	0.0507983	0.0464441	0.0406386	0.0188679	0.0827286	0.0624093	0.0725689	0.0362845	0.0101597	0.0246734	0.0624093	0.0217707	0.0609579	0.0406386	0.0725689	0.0464441	0.0870827	0.0638607	0.0348331	0.0609579	0.0522496	0.0246734	0.0435414	0.0203193	0.0217707	0.0362845	0.0856313	0.0275762	0.0740203	0.0595065	0.0812772	0.0377358
NFATC4	ENST00000250373.9	full-splice_match	1	0	0	4762	2706	157	1899	0.595968	0.63475	0.664557	0.535018	0.0099889	0.0188679	0.0388457	0.0110988	0.0299667	0.0566038	0.0166482	0.0299667	0.0488346	0.0765816	0.0832408	0.0277469	0.00443951	0.0310766	0.0410655	0.0155383	0.0277469	0.0432852	0.0932297	0.0355161	0.0843507	0.099889	0.0488346	0.114317	0.0221976	0.0321865	0.0566038	0.0133185	0.036626	0.0699223	0.105438	0.0388457	0.0377358	0.0443951	0.09101	0.0221976
DHRS2	ENST00000250383.11	full-splice_match	1	0	0	1676	840	447	389	0.542363	0.597139	0.495536	0.478149	0.0107527	0.0430108	0.046595	0.0179211	0.0358423	0.0286738	0.0322581	0.0430108	0.0430108	0.0860215	0.0752688	0.0430108	0.00716846	0.046595	0.0250896	0.0215054	0.0394265	0.0358423	0.114695	0.0501792	0.0681004	0.0394265	0.0358423	0.0394265	0.00716846	0.0143369	0.0537634	0.0394265	0.0322581	0.0322581	0.11828	0.0286738	0.0537634	0.0430108	0.0645161	0.0250896
BCL2L2	ENST00000250405.10	full-splice_match	1	0	0	3526	579	158	2789	0.519285	0.628028	0.698113	0.486554	0	0.0416667	0.0364583	0	0.0364583	0.046875	0.03125	0.046875	0.0416667	0.0729167	0.0729167	0.0416667	0.0104167	0.015625	0.0364583	0	0.046875	0.046875	0.09375	0.015625	0.0572917	0.0625	0.0364583	0.046875	0.015625	0.0364583	0.0625	0.0104167	0.015625	0.0364583	0.140625	0.0520833	0.0208333	0.0625	0.078125	0.03125
PARP2	ENST00000250416.9	full-splice_match	1	0	0	1886	1749	27	110	0.454401	0.464531	0.5	0.281818	0.0687285	0.0378007	0.103093	0.0738832	0.0704467	0.0412371	0.00687285	0.0395189	0.0841924	0.0498282	0.080756	0.0463918	0.0292096	0.0343643	0.0893471	0.0446735	0.0687285	0.0343643	0.0876289	0.0395189	0.0756014	0.0309278	0.0120275	0.0412371	0.0171821	0.00687285	0.0206186	0.00687285	0.0446735	0.0395189	0.0463918	0.0498282	0.104811	0.0446735	0.0532646	0.0498282
FOXA1	ENST00000250448.5	full-splice_match	1	0	0	3509	1416	277	1816	0.504417	0.663604	0.805755	0.334251	0.00636943	0.0530786	0.0467091	0.00636943	0.0382166	0.0636943	0.044586	0.0552017	0.0339703	0.0912951	0.0424628	0.014862	0.00849257	0.0191083	0.059448	0.00424628	0.0509554	0.044586	0.0828025	0.0700637	0.0934183	0.07431	0.0870488	0.0806794	0.0276008	0.0912951	0.10828	0.0276008	0.044586	0.0828025	0.0573248	0.0233546	0.0467091	0.0552017	0.0403397	0.00849257
CHRNA10	ENST00000250699.2	full-splice_match	1	0	0	1945	1350	72	523	0.613368	0.650111	0.616438	0.518164	0.00445434	0.0222717	0.0200445	0.00668151	0.0244989	0.0668151	0.0445434	0.0356347	0.0289532	0.0668151	0.0334076	0.0267261	0.00668151	0.0289532	0.0489978	0.00668151	0.0222717	0.0690423	0.0757238	0.0467706	0.0957684	0.0556793	0.0712695	0.109131	0.0311804	0.077951	0.0489978	0.0489978	0.0311804	0.0556793	0.144766	0.0378619	0.0244989	0.0534521	0.0467706	0.0244989
MAPK8IP3	ENST00000250894.8	full-splice_match	1	0	0	5661	4008	157	1496	0.645999	0.630646	0.803797	0.670455	0.0127341	0.0329588	0.0561798	0.0127341	0.0426966	0.0606742	0.0516854	0.023221	0.0614232	0.093633	0.071161	0.0322097	0.00299625	0.0374532	0.0434457	0.0104869	0.0441948	0.0599251	0.101873	0.0419476	0.101124	0.0651685	0.059176	0.0531835	0.0456929	0.047191	0.0659176	0.0382022	0.0217228	0.0434457	0.0891386	0.0134831	0.0539326	0.0599251	0.0958801	0.0299625
MKNK2	ENST00000250896.9	full-splice_match	1	0	0	3785	1395	245	2145	0.618758	0.63056	0.841463	0.585548	0.0172414	0.0323276	0.0581897	0	0.0366379	0.0646552	0.0344828	0.0280172	0.0603448	0.0883621	0.0862069	0.0301724	0.00431034	0.0366379	0.0193966	0.0107759	0.0452586	0.0474138	0.103448	0.049569	0.0969828	0.0646552	0.0603448	0.0818966	0.0387931	0.049569	0.0560345	0.0301724	0.0237069	0.0517241	0.107759	0.0344828	0.0409483	0.0646552	0.0926724	0.0150862
KLF16	ENST00000250916.6	full-splice_match	1	0	0	2901	756	82	2063	0.677697	0.772185	0.843373	0.636452	0.00796813	0.00398406	0.0358566	0	0.0159363	0.0756972	0.0278884	0.0199203	0.0119522	0.059761	0.0199203	0.0199203	0	0.00796813	0.00796813	0.00398406	0.0239044	0.063745	0.0478088	0.0119522	0.0717131	0.14741	0.207171	0.115538	0.0358566	0.215139	0.111554	0.0278884	0.0119522	0.0756972	0.0876494	0.0358566	0.0119522	0.0517928	0.0278884	0.00796813
PGAP6	ENST00000250930.7	full-splice_match	1	0	0	2346	1734	486	126	0.640665	0.632429	0.687885	0.571429	0.00693241	0.0277296	0.0121317	0.0121317	0.0519931	0.0745234	0.0381282	0.0311958	0.0329289	0.0710572	0.034662	0.0207972	0.0034662	0.0311958	0.0381282	0.00693241	0.0329289	0.067591	0.0953206	0.0450607	0.0745234	0.0727903	0.0485269	0.126516	0.0207972	0.0485269	0.0537262	0.034662	0.034662	0.0727903	0.138648	0.05026	0.0190641	0.0589255	0.0467938	0.0155979
SALL1	ENST00000251020.9	full-splice_match	1	0	0	5134	3972	29	1133	0.498052	0.539914	0.533333	0.350397	0.0355253	0.0536659	0.0627362	0.0355253	0.0559335	0.0506425	0.0204082	0.0385488	0.0634921	0.0861678	0.0385488	0.0536659	0.0120937	0.0559335	0.0393046	0.0287226	0.0733182	0.0619803	0.115646	0.0566893	0.101285	0.0642479	0.0272109	0.0687831	0.0287226	0.0173847	0.0347695	0.0181406	0.0234316	0.0672714	0.0657596	0.0498866	0.0604686	0.0355253	0.0544218	0.0309902
LMAN1	ENST00000251047.6	full-splice_match	1	0	0	4824	1530	21	3273	0.371061	0.454545	0.545455	0.330889	0.086444	0.0373281	0.0746562	0.0766208	0.0530452	0.0392927	0.00982318	0.0373281	0.0844794	0.0530452	0.0550098	0.043222	0.043222	0.0471513	0.064833	0.064833	0.0746562	0.0353635	0.0687623	0.043222	0.0550098	0.0196464	0.0275049	0.0373281	0.021611	0.0196464	0.0294695	0.0157171	0.021611	0.0196464	0.0687623	0.0491159	0.086444	0.0491159	0.0687623	0.0491159
NUP37	ENST00000251074.5	full-splice_match	1	0	0	1203	978	65	160	0.393184	0.422723	0.348485	0.23125	0.0523077	0.0338462	0.0676923	0.0830769	0.0430769	0.0276923	0.0123077	0.0430769	0.0646154	0.0430769	0.0492308	0.04	0.0307692	0.0553846	0.0646154	0.0953846	0.0584615	0.0369231	0.0646154	0.0646154	0.0430769	0.0215385	0.0123077	0.0523077	0.0153846	0	0.00615385	0.0153846	0.0153846	0.0338462	0.0646154	0.0461538	0.08	0.0307692	0.0492308	0.0584615
DMXL2	ENST00000251076.9	full-splice_match	1	0	0	10672	9108	288	1276	0.408265	0.410234	0.702422	0.327586	0.0616145	0.0484349	0.07743	0.0645799	0.062603	0.0345964	0.00988468	0.0487644	0.0757825	0.0408567	0.0444811	0.0553542	0.0474465	0.0517298	0.076112	0.0731466	0.0645799	0.0398682	0.0685338	0.0658979	0.0481054	0.0181219	0.00593081	0.04514	0.0121911	0.00527183	0.00856672	0.00724876	0.0352554	0.0385502	0.061944	0.061944	0.0800659	0.030313	0.0388797	0.0655684
DSC2	ENST00000251081.8	full-splice_match	1	0	0	12377	2541	450	9386	0.38919	0.430315	0.654102	0.365331	0.0661939	0.0567376	0.0661939	0.0685579	0.0744681	0.0425532	0.0141844	0.0661939	0.0851064	0.0330969	0.0401891	0.0543735	0.0472813	0.0508274	0.0638298	0.0602837	0.0744681	0.0401891	0.0650118	0.0591017	0.0650118	0.0248227	0.00945626	0.0520095	0.00945626	0.00827423	0.0177305	0.0118203	0.036643	0.0330969	0.0602837	0.0508274	0.072104	0.0449173	0.0591017	0.0567376
ANGEL1	ENST00000251089.8	full-splice_match	1	0	0	5287	2010	55	3222	0.524116	0.563464	0.785714	0.495034	0.0119581	0.0224215	0.0418535	0.0269058	0.0298954	0.0493274	0.00747384	0.0463378	0.0687593	0.0717489	0.0672646	0.038864	0.0209268	0.0418535	0.058296	0.019432	0.0269058	0.0358744	0.112108	0.0418535	0.0866966	0.0612855	0.0179372	0.0911809	0.0179372	0.019432	0.0209268	0.0119581	0.0269058	0.0568012	0.125561	0.0612855	0.0523169	0.038864	0.0792227	0.0493274
SAMD4A	ENST00000251091.9	full-splice_match	1	0	0	6565	1890	305	4370	0.474181	0.571731	0.584967	0.424256	0.0413355	0.0492846	0.0476948	0.0349762	0.0620032	0.063593	0.0206677	0.0349762	0.0651828	0.0794913	0.0476948	0.027027	0.0158983	0.0397456	0.0524642	0.0254372	0.0588235	0.0588235	0.109698	0.0413355	0.09062	0.0588235	0.0588235	0.063593	0.0397456	0.0508744	0.0302067	0.0206677	0.0174881	0.0763116	0.0810811	0.0286169	0.063593	0.0572337	0.0492846	0.0381558
CDADC1	ENST00000251108.10	full-splice_match	1	0	0	3386	1542	113	1731	0.401654	0.418559	0.614035	0.372617	0.109162	0.0467836	0.0896686	0.0740741	0.0662768	0.0331384	0.00389864	0.0409357	0.0974659	0.0487329	0.0623782	0.0409357	0.0350877	0.0389864	0.0916179	0.0467836	0.0584795	0.0253411	0.0838207	0.0545809	0.0487329	0.0136452	0.0136452	0.0292398	0.00779727	0.00389864	0.0233918	0.00389864	0.0194932	0.0194932	0.0545809	0.0604288	0.11306	0.037037	0.0506823	0.0506823
DOCK7	ENST00000251157.10	full-splice_match	1	0	0	7084	6393	0	691	0.404997	0.41724	0	0.29233	0.0661972	0.0450704	0.0835681	0.0685446	0.0553991	0.0403756	0.0159624	0.0483568	0.0849765	0.0460094	0.0408451	0.0488263	0.0384977	0.0619718	0.0615023	0.0624413	0.0685446	0.0356808	0.0751174	0.0507042	0.0502347	0.0178404	0.013615	0.0488263	0.0183099	0.0084507	0.0131455	0.0112676	0.0333333	0.0370892	0.0596244	0.0652582	0.0877934	0.0370892	0.0394366	0.0615023
CORO7	ENST00000251166.9	full-splice_match	1	0	0	3472	2775	78	619	0.643721	0.645278	0.734177	0.625202	0.00974026	0.0183983	0.0443723	0.00541126	0.0367965	0.0627706	0.0313853	0.030303	0.034632	0.0876623	0.0649351	0.034632	0.00324675	0.0194805	0.0292208	0.00757576	0.0378788	0.0562771	0.0995671	0.0248918	0.0779221	0.0811688	0.0519481	0.109307	0.0335498	0.0497835	0.0454545	0.0270563	0.0119048	0.0616883	0.151515	0.034632	0.0270563	0.0714286	0.0703463	0.0238095
SEC14L5	ENST00000251170.12	full-splice_match	1	0	0	6445	2088	167	4190	0.550504	0.623383	0.678571	0.509069	0.0143885	0.018705	0.0460432	0.0143885	0.0489209	0.057554	0.028777	0.0258993	0.047482	0.076259	0.0805755	0.0330935	0.0057554	0.0330935	0.0388489	0.0158273	0.0402878	0.047482	0.0906475	0.0417266	0.0719424	0.0748201	0.0532374	0.0863309	0.0230216	0.0417266	0.057554	0.0330935	0.0215827	0.0589928	0.103597	0.0388489	0.0374101	0.0604317	0.0892086	0.0330935
CLSPN	ENST00000251195.9	full-splice_match	1	0	0	4769	3996	97	676	0.447893	0.437046	0.663265	0.480769	0.100676	0.0555973	0.119459	0.054846	0.0586026	0.0308039	0.00976709	0.0510894	0.121713	0.0631104	0.0848986	0.0578512	0.0315552	0.0338092	0.0773854	0.0383171	0.0503381	0.0338092	0.100676	0.0390684	0.0540947	0.0180316	0.00375657	0.0390684	0.014275	0.00450789	0.00601052	0.00601052	0.026296	0.0330579	0.0586026	0.0503381	0.143501	0.0390684	0.0856499	0.069121
MEGF8	ENST00000251268.11	full-splice_match	1	0	0	11137	8535	609	1993	0.636347	0.657956	0.645902	0.540893	0.00527426	0.0207454	0.0186357	0.0140647	0.0305907	0.064346	0.033052	0.0397328	0.0225035	0.0576653	0.0537975	0.0277778	0.00421941	0.0151195	0.0425457	0.00738397	0.0309423	0.0668073	0.080872	0.0281294	0.0850914	0.0770042	0.0601266	0.103024	0.0242616	0.0439522	0.0580169	0.0277778	0.0196906	0.0615331	0.150844	0.0379747	0.0179325	0.0545007	0.0573136	0.0179325
HCN2	ENST00000251287.3	full-splice_match	1	0	0	3420	2667	65	688	0.708187	0.696549	0.878788	0.736919	0.00112613	0.0259009	0.036036	0.00337838	0.0281532	0.0461712	0.0337838	0.0382883	0.0315315	0.0619369	0.0484234	0.0191441	0	0.0495495	0.0382883	0.00675676	0.0416667	0.0495495	0.0664414	0.0551802	0.0698198	0.079955	0.132883	0.0641892	0.0326577	0.137387	0.106982	0.036036	0.0168919	0.0574324	0.0720721	0.0337838	0.0225225	0.0461712	0.0563063	0.0281532
INTS2	ENST00000251334.7	full-splice_match	1	0	0	6128	3588	347	2193	0.405679	0.430722	0.577586	0.337437	0.0502092	0.0393305	0.0736402	0.060251	0.0543933	0.0225941	0.0133891	0.0569038	0.0669456	0.060251	0.0426778	0.0502092	0.0393305	0.0351464	0.0711297	0.0610879	0.0585774	0.0376569	0.0778243	0.0401674	0.051046	0.0158996	0.0083682	0.0476987	0.0117155	0.0083682	0.0100418	0.0117155	0.0334728	0.0410042	0.0627615	0.0870293	0.0753138	0.0284519	0.0468619	0.0585774
MAST1	ENST00000251472.9	full-splice_match	1	0	0	4853	4710	58	85	0.636307	0.636016	0.813559	0.529412	0.0114723	0.0235819	0.0528999	0.00956023	0.0350542	0.0662843	0.0382409	0.0305927	0.0446144	0.0764818	0.069471	0.0325048	0.00828553	0.0388783	0.0337795	0.00956023	0.0452518	0.0707457	0.0783939	0.0382409	0.0815806	0.0815806	0.0764818	0.0828553	0.0439771	0.0803059	0.056724	0.0267686	0.0280433	0.0783939	0.0764818	0.0337795	0.0369662	0.0535373	0.0777565	0.0267686
PLPPR2	ENST00000251473.9	full-splice_match	1	0	0	2727	1029	376	1322	0.628163	0.654669	0.700265	0.586989	0.00877193	0.0204678	0.0233918	0.00292398	0.0233918	0.0847953	0.0350877	0.0292398	0.0204678	0.0321637	0.0467836	0.0292398	0.00584795	0.0350877	0.0116959	0.00877193	0.0233918	0.0818713	0.0526316	0.0350877	0.0877193	0.0818713	0.0847953	0.125731	0.0321637	0.0818713	0.0584795	0.0409357	0.0233918	0.0526316	0.134503	0.0672515	0.0204678	0.0350877	0.0438596	0.0204678
SULT1C2	ENST00000251481.11	full-splice_match	1	0	0	2539	888	197	1454	0.432454	0.468997	0.545455	0.394773	0.111864	0.0644068	0.0779661	0.0474576	0.0440678	0.0745763	0.0169492	0.0474576	0.0915254	0.0372881	0.0508475	0.0305085	0.0237288	0.040678	0.0813559	0.040678	0.0576271	0.040678	0.0644068	0.0542373	0.0949153	0.0305085	0.00677966	0.0813559	0.0101695	0.00338983	0.0101695	0.020339	0.0338983	0.0474576	0.0711864	0.0474576	0.111864	0.0576271	0.0542373	0.0610169
NCAPG	ENST00000251496.7	full-splice_match	1	0	0	4587	3045	99	1443	0.386963	0.39389	0.67	0.352737	0.0887574	0.0463511	0.104536	0.081854	0.0463511	0.0266272	0.00887574	0.0453649	0.10355	0.0502959	0.0522682	0.0463511	0.0394477	0.0424063	0.0788955	0.0779093	0.066075	0.0207101	0.0779093	0.0384615	0.0493097	0.0128205	0.00690335	0.0295858	0.0118343	0.00986193	0.00788955	0.00690335	0.0295858	0.0295858	0.056213	0.0650888	0.110454	0.0345168	0.0463511	0.0719921
RABGAP1L	ENST00000251507.8	full-splice_match	1	0	0	2899	2445	174	280	0.431528	0.423895	0.657143	0.357143	0.0565111	0.041769	0.0909091	0.0589681	0.0565111	0.041769	0.012285	0.0405405	0.103194	0.0429975	0.0601966	0.0577396	0.0454545	0.0282555	0.0786241	0.0663391	0.0638821	0.022113	0.0823096	0.0503686	0.0552826	0.022113	0.00982801	0.034398	0.017199	0.0036855	0.004914	0.00982801	0.0331695	0.027027	0.0626536	0.0503686	0.0909091	0.0380835	0.0663391	0.0626536
ESYT2	ENST00000251527.10	full-splice_match	1	0	0	5960	2535	210	3215	0.472819	0.526835	0.805687	0.408398	0.0604265	0.042654	0.0793839	0.0319905	0.042654	0.0521327	0.0236967	0.028436	0.0675355	0.063981	0.0651659	0.0402844	0.0177725	0.0438389	0.0390995	0.0402844	0.063981	0.0367299	0.0841232	0.0379147	0.0699052	0.0390995	0.0236967	0.0687204	0.0260664	0.0367299	0.0296209	0.0225118	0.014218	0.0556872	0.0829384	0.0485782	0.0734597	0.0533175	0.056872	0.0414692
ALOX12	ENST00000251535.11	full-splice_match	1	0	0	2392	1989	69	334	0.568562	0.584004	0.757143	0.437126	0.0226586	0.0317221	0.0468278	0.0271903	0.0332326	0.0634441	0.021148	0.0392749	0.0589124	0.0513595	0.0694864	0.0271903	0.0120846	0.0438066	0.0664653	0.0181269	0.0453172	0.0498489	0.0845921	0.0498489	0.0966767	0.0679758	0.0407855	0.0785498	0.021148	0.0332326	0.0332326	0.0226586	0.0226586	0.0589124	0.125378	0.0317221	0.0543807	0.0513595	0.070997	0.0483384
ADAMTS2	ENST00000251582.12	full-splice_match	1	0	0	6783	3633	133	3017	0.575114	0.631883	0.783582	0.497514	0.014876	0.0305785	0.0487603	0.0165289	0.0454545	0.0619835	0.0561983	0.0297521	0.0438017	0.0669421	0.0603306	0.0289256	0.00330579	0.0322314	0.0528926	0.00743802	0.0528926	0.068595	0.0727273	0.046281	0.085124	0.068595	0.0760331	0.0801653	0.0396694	0.0636364	0.0619835	0.0322314	0.0231405	0.0528926	0.104132	0.0256198	0.038843	0.0669421	0.0727273	0.0247934
DHX29	ENST00000251636.10	full-splice_match	1	0	0	4664	4107	121	436	0.40223	0.402338	0.663934	0.327982	0.100877	0.0475146	0.107456	0.0804094	0.0511696	0.0365497	0.00877193	0.0402047	0.0899123	0.0555556	0.0511696	0.0511696	0.0409357	0.0431287	0.0592105	0.0789474	0.0687135	0.0255848	0.0745614	0.0394737	0.0482456	0.0204678	0.0168129	0.0431287	0.0116959	0.00511696	0.0124269	0.00730994	0.0343567	0.0328947	0.0555556	0.0555556	0.112573	0.0233918	0.0453216	0.0599415
DHX58	ENST00000251642.8	full-splice_match	1	0	0	2591	2034	204	353	0.585102	0.594196	0.609756	0.518414	0.0236337	0.0443131	0.042836	0.0206795	0.0413589	0.0635155	0.0251108	0.0413589	0.0443131	0.0871492	0.0635155	0.0339734	0.00443131	0.0472674	0.0620384	0.00886263	0.0590842	0.05613	0.110783	0.0472674	0.0930576	0.0516987	0.0413589	0.05613	0.0162482	0.0310192	0.0384047	0.0265879	0.0206795	0.0413589	0.115214	0.0354505	0.042836	0.0516987	0.070901	0.0398818
ARFGEF3	ENST00000251691.5	full-splice_match	1	0	0	14859	6531	148	8180	0.457635	0.555743	0.785235	0.37335	0.0307904	0.0307904	0.066636	0.0234375	0.0482537	0.0500919	0.0220588	0.0399816	0.0657169	0.0795037	0.0643382	0.0413603	0.0170037	0.0363051	0.0496324	0.027114	0.0454963	0.0491728	0.100643	0.0477941	0.0799632	0.0445772	0.0349265	0.0693934	0.0248162	0.0261949	0.035386	0.0183824	0.0206801	0.0620404	0.102941	0.0404412	0.0657169	0.0528493	0.0712316	0.042739
SPAG1	ENST00000251809.4	full-splice_match	1	0	0	3748	2778	86	884	0.413554	0.445805	0.712644	0.282805	0.107027	0.052973	0.125405	0.0594595	0.0508108	0.027027	0.00972973	0.0410811	0.101622	0.0821622	0.0681081	0.0291892	0.0432432	0.0410811	0.052973	0.0616216	0.067027	0.0194595	0.0789189	0.0410811	0.0454054	0.0140541	0.0227027	0.0389189	0.0118919	0.0162162	0.0432432	0.0108108	0.0313514	0.0356757	0.0551351	0.0443243	0.114595	0.0302703	0.0562162	0.0616216
RRM2B	ENST00000251810.8	full-splice_match	1	0	0	4774	1053	87	3634	0.350859	0.41635	0.659091	0.324436	0.0885714	0.0371429	0.0771429	0.06	0.0457143	0.0171429	0.00857143	0.0457143	0.102857	0.0457143	0.0628571	0.0514286	0.0285714	0.0514286	0.0657143	0.06	0.0371429	0.0314286	0.105714	0.0371429	0.0371429	0.0142857	0.0114286	0.04	0.0171429	0.00857143	0.0142857	0.00571429	0.0171429	0.0371429	0.04	0.0914286	0.102857	0.0257143	0.0628571	0.0742857
RHOBTB2	ENST00000251822.7	full-splice_match	1	0	0	5482	2181	568	2733	0.594126	0.595413	0.664323	0.578485	0.0137741	0.0316804	0.0454545	0.0137741	0.0413223	0.101928	0.0275482	0.0151515	0.0440771	0.0606061	0.0523416	0.0261708	0.00275482	0.0509642	0.0578512	0.0165289	0.053719	0.0730028	0.0647383	0.0633609	0.11708	0.0619835	0.0482094	0.0909091	0.0289256	0.030303	0.0385675	0.0330579	0.023416	0.0661157	0.0895317	0.0399449	0.0330579	0.053719	0.0661157	0.0413223
RIC1	ENST00000251879.10	full-splice_match	1	0	0	4127	3495	285	347	0.469591	0.455352	0.776224	0.360231	0.04811	0.040378	0.0549828	0.0506873	0.0713058	0.0429553	0.0111684	0.0429553	0.0601375	0.0584192	0.0472509	0.056701	0.0300687	0.0429553	0.0601375	0.0558419	0.0506873	0.0463918	0.0798969	0.0549828	0.0506873	0.0412371	0.016323	0.0609966	0.0120275	0.00945017	0.0128866	0.0111684	0.032646	0.0420962	0.0773196	0.0687285	0.0592784	0.0378007	0.0618557	0.040378
SCML2	ENST00000251900.9	full-splice_match	1	0	0	4162	2100	121	1941	0.397165	0.44545	0.57377	0.333849	0.0858369	0.0500715	0.0901288	0.0457797	0.0543634	0.0429185	0.00572246	0.0457797	0.0629471	0.0457797	0.0515021	0.0658083	0.0400572	0.0386266	0.0658083	0.0586552	0.055794	0.0314735	0.0829757	0.0486409	0.0715308	0.0329041	0.0157368	0.0572246	0.0143062	0.0100143	0.00858369	0.0100143	0.0343348	0.0543634	0.0686695	0.0457797	0.0886981	0.0271817	0.0443491	0.0643777
CARD10	ENST00000251973.10	full-splice_match	1	0	0	4111	3096	215	800	0.65191	0.657512	0.777778	0.59625	0.00775946	0.0203686	0.0552861	0.00969932	0.0252182	0.0455868	0.014549	0.0310378	0.0562561	0.0989331	0.101843	0.0271581	0.000969932	0.0329777	0.0252182	0.00581959	0.0339476	0.0329777	0.108632	0.029098	0.0601358	0.0620757	0.0620757	0.0882638	0.0242483	0.0397672	0.0727449	0.0242483	0.0155189	0.0611057	0.134821	0.0213385	0.0475267	0.0484966	0.117362	0.0213385
DHX35	ENST00000252011.8	full-splice_match	1	0	0	3314	2109	24	1181	0.490947	0.486717	0.52	0.497883	0.0527066	0.031339	0.0683761	0.0512821	0.0527066	0.037037	0.017094	0.0413105	0.0626781	0.0612536	0.0641026	0.0512821	0.025641	0.048433	0.0569801	0.045584	0.0498575	0.0384615	0.0883191	0.0441595	0.0555556	0.0242165	0.0270655	0.045584	0.031339	0.0213675	0.0213675	0.0128205	0.0270655	0.0413105	0.0826211	0.0498575	0.0811966	0.0470085	0.0612536	0.0441595
TYMP	ENST00000252029.8	full-splice_match	1	0	0	1586	1446	119	21	0.694199	0.694118	0.733333	0.47619	0.004158	0.00831601	0.031185	0.00831601	0.024948	0.037422	0.031185	0.016632	0.039501	0.0977131	0.0665281	0.016632	0.004158	0.022869	0.033264	0.010395	0.022869	0.033264	0.108108	0.027027	0.0561331	0.0665281	0.0914761	0.0623701	0.02079	0.114345	0.0810811	0.033264	0.00623701	0.0540541	0.122661	0.029106	0.018711	0.0665281	0.0810811	0.027027
DNAAF9	ENST00000252032.10	full-splice_match	1	0	0	6912	3531	112	3269	0.486834	0.476204	0.778761	0.488223	0.0408163	0.0340136	0.0629252	0.0493197	0.0442177	0.0416667	0.0119048	0.0467687	0.0688776	0.0705782	0.0501701	0.042517	0.0212585	0.0510204	0.0637755	0.0552721	0.045068	0.0391156	0.0977891	0.0561224	0.0688776	0.0357143	0.0170068	0.0561224	0.00935374	0.0144558	0.0204082	0.0110544	0.0331633	0.0527211	0.0867347	0.0578231	0.0714286	0.0365646	0.0510204	0.0527211
CUL9	ENST00000252050.9	full-splice_match	1	0	0	7759	7551	63	145	0.58474	0.583046	0.78125	0.586207	0.0143084	0.0302067	0.0465024	0.0166932	0.0349762	0.0556439	0.0178855	0.0381558	0.0651828	0.0826709	0.0675676	0.0317965	0.0103339	0.0345787	0.0512719	0.018283	0.0357711	0.0476948	0.106518	0.0421304	0.0782989	0.0516693	0.0306041	0.0914149	0.0218601	0.0242448	0.032194	0.0166932	0.0230525	0.0667727	0.130763	0.0421304	0.0508744	0.0437202	0.086248	0.0405405
PCDHGA12	ENST00000252085.4	full-splice_match	1	0	0	4854	2796	253	1805	0.566131	0.580322	0.496063	0.554017	0.0311493	0.037594	0.0515575	0.0365199	0.0451128	0.0580021	0.0504834	0.0354458	0.0537057	0.0612245	0.0515575	0.0418904	0.0161117	0.0354458	0.0365199	0.0268528	0.0547798	0.0558539	0.0784103	0.0236305	0.0644468	0.0633727	0.0601504	0.0644468	0.0418904	0.0590763	0.0622986	0.0290011	0.027927	0.0601504	0.0816327	0.0332975	0.0547798	0.0698174	0.0633727	0.0332975
PCDHGC5	ENST00000252087.3	full-splice_match	1	0	0	4797	2832	160	1805	0.56306	0.571529	0.515528	0.554017	0.0148462	0.0254507	0.0339343	0.0402969	0.0509014	0.0615058	0.0243902	0.0466596	0.0551432	0.078473	0.0466596	0.0318134	0.0106045	0.038176	0.0615058	0.0201485	0.0509014	0.0699894	0.106045	0.0339343	0.0922587	0.068929	0.0328738	0.0710498	0.0137858	0.0275716	0.0371156	0.0201485	0.0360551	0.0678685	0.0922587	0.0434783	0.0349947	0.0636267	0.0604454	0.0424178
TMCO6	ENST00000252100.6	full-splice_match	1	0	0	1834	1497	24	313	0.570338	0.588904	0.64	0.476038	0.0261044	0.0321285	0.0341365	0.0100402	0.0341365	0.0321285	0.0120482	0.0321285	0.0441767	0.106426	0.0803213	0.0341365	0.0060241	0.0321285	0.0321285	0.0120482	0.0341365	0.0361446	0.134538	0.0361446	0.064257	0.0421687	0.0200803	0.0963855	0.0160643	0.0140562	0.0381526	0.0140562	0.0200803	0.0722892	0.15261	0.0542169	0.0321285	0.0220884	0.0843373	0.0220884
UBE4A	ENST00000252108.8	full-splice_match	1	0	0	6088	3198	116	2774	0.412943	0.45574	0.564103	0.357246	0.0525822	0.0591549	0.0591549	0.0553991	0.056338	0.0469484	0.00751174	0.0478873	0.0910798	0.0525822	0.0403756	0.0347418	0.02723	0.0704225	0.0704225	0.0460094	0.0723005	0.0356808	0.0873239	0.0544601	0.0835681	0.0366197	0.0178404	0.058216	0.0140845	0.0103286	0.0112676	0.0084507	0.0356808	0.0450704	0.0676056	0.0666667	0.0723005	0.0328638	0.0544601	0.0694836
ZKSCAN3	ENST00000252211.7	full-splice_match	1	0	0	4687	1614	183	2890	0.458929	0.520149	0.554348	0.418685	0.0540037	0.0260708	0.0837989	0.0391061	0.0558659	0.0316574	0.0018622	0.0260708	0.100559	0.0893855	0.0819367	0.0502793	0.0204842	0.0502793	0.0614525	0.0223464	0.0260708	0.0391061	0.117318	0.0540037	0.0614525	0.0446927	0.0260708	0.0595903	0.0148976	0.0130354	0.0148976	0.00744879	0.0260708	0.0409683	0.0837989	0.0353818	0.102421	0.0260708	0.106145	0.0391061
DPF2	ENST00000252268.8	full-splice_match	1	0	0	2462	1215	20	1227	0.545085	0.550247	0.571429	0.539527	0.039604	0.029703	0.0816832	0.0272277	0.0470297	0.0668317	0.00990099	0.0519802	0.0717822	0.0643564	0.0569307	0.0445545	0.0148515	0.039604	0.0594059	0.0173267	0.0544554	0.0371287	0.0668317	0.0321782	0.0816832	0.0569307	0.0371287	0.0792079	0.0420792	0.0222772	0.0346535	0.0173267	0.0247525	0.0569307	0.10396	0.0321782	0.0717822	0.0717822	0.0767327	0.0594059
GALNT8	ENST00000252318.7	full-splice_match	1	0	0	2321	1911	278	132	0.498061	0.494241	0.544803	0.454545	0.0534591	0.0566038	0.0676101	0.0487421	0.0597484	0.0455975	0.0251572	0.0597484	0.0644654	0.0534591	0.0518868	0.0267296	0.0235849	0.0503145	0.0644654	0.0393082	0.0597484	0.0566038	0.0660377	0.0455975	0.0691824	0.0361635	0.0188679	0.0518868	0.0141509	0.0235849	0.0235849	0.0141509	0.0314465	0.0581761	0.0849057	0.0518868	0.091195	0.0393082	0.0534591	0.0566038
KCNA5	ENST00000252321.5	full-splice_match	1	0	0	2910	1839	269	802	0.586254	0.651795	0.696296	0.399002	0.00653595	0.0326797	0.0343137	0.00326797	0.0196078	0.0539216	0.0441176	0.0277778	0.0490196	0.0555556	0.0767974	0.0261438	0.00163399	0.0555556	0.0261438	0.00653595	0.0343137	0.0424837	0.0800654	0.0571895	0.0849673	0.0767974	0.0718954	0.0882353	0.0375817	0.0653595	0.0751634	0.0277778	0.0212418	0.0604575	0.0898693	0.0588235	0.0310458	0.0490196	0.0882353	0.0212418
NALF2	ENST00000252338.5	full-splice_match	1	0	0	4928	1416	957	2555	0.622362	0.640989	0.76618	0.558121	0.029724	0.0233546	0.0360934	0.0233546	0.0318471	0.0636943	0.0212314	0.0509554	0.0276008	0.0658174	0.0530786	0.0169851	0.0191083	0.0212314	0.0254777	0.00849257	0.0467091	0.0467091	0.07431	0.0212314	0.0764331	0.0828025	0.0934183	0.0764331	0.0403397	0.0552017	0.0721868	0.029724	0.0191083	0.0658174	0.129512	0.0424628	0.0318471	0.059448	0.0488323	0.0169851
ECSIT	ENST00000252440.11	full-splice_match	1	0	0	1501	888	99	514	0.618254	0.615558	0.62	0.622568	0.0101695	0.0474576	0.040678	0.00338983	0.0440678	0.0745763	0.0271186	0.0237288	0.0372881	0.0711864	0.0745763	0.040678	0.00338983	0.0338983	0.0338983	0.0169492	0.0508475	0.0440678	0.0915254	0.0474576	0.0881356	0.0949153	0.0305085	0.108475	0.020339	0.0338983	0.0610169	0.0169492	0.0271186	0.0576271	0.108475	0.0338983	0.0372881	0.0474576	0.0813559	0.0305085
CDC16	ENST00000252458.6	full-splice_match	1	0	0	1991	1425	283	283	0.418383	0.40309	0.507042	0.40636	0.092827	0.0590717	0.0738397	0.0696203	0.0780591	0.035865	0.021097	0.0485232	0.0759494	0.0590717	0.021097	0.0316456	0.0379747	0.0443038	0.0864979	0.0632911	0.0464135	0.0400844	0.0548523	0.056962	0.0316456	0.0105485	0.00843882	0.0485232	0.021097	0.00843882	0.0105485	0.00843882	0.0464135	0.0189873	0.0611814	0.0843882	0.113924	0.0400844	0.0316456	0.0611814
INF2	ENST00000252527.8	full-splice_match	1	1	0	3050	2151	0	899	0.635082	0.634419	1	0.636263	0.0111732	0.0335196	0.0768156	0.00558659	0.0363128	0.0530726	0.0335196	0.0251397	0.0488827	0.113128	0.0977654	0.0195531	0.00418994	0.0335196	0.0335196	0.0111732	0.047486	0.0488827	0.099162	0.0335196	0.0963687	0.075419	0.0642458	0.0837989	0.0460894	0.0307263	0.0600559	0.0223464	0.0125698	0.0530726	0.104749	0.0307263	0.0600559	0.0530726	0.100559	0.0377095
SAFB2	ENST00000252542.9	full-splice_match	1	0	0	3167	2859	61	247	0.569624	0.582925	0.66129	0.392713	0.0504202	0.0273109	0.0997899	0.0252101	0.0388655	0.0367647	0.0388655	0.0220588	0.0997899	0.106092	0.0798319	0.0378151	0.0115546	0.032563	0.0451681	0.0241597	0.0409664	0.0388655	0.085084	0.0336134	0.0651261	0.0357143	0.0409664	0.0367647	0.0504202	0.0388655	0.0882353	0.0210084	0.0178571	0.0357143	0.0514706	0.0210084	0.0913866	0.0588235	0.118697	0.0462185
NCAN	ENST00000252575.11	full-splice_match	1	0	0	6402	3963	114	2325	0.561231	0.61686	0.747826	0.457204	0.0189394	0.0310606	0.0378788	0.0181818	0.0424242	0.075	0.0189394	0.0340909	0.0462121	0.0689394	0.0818182	0.0310606	0.00606061	0.0227273	0.0530303	0.0166667	0.0424242	0.0704545	0.0969697	0.0333333	0.100758	0.0863636	0.05	0.0765152	0.0265152	0.0340909	0.0386364	0.0143939	0.0272727	0.0416667	0.105303	0.0333333	0.0386364	0.05	0.0848485	0.0333333
PLVAP	ENST00000252590.9	full-splice_match	1	0	0	2290	1326	54	910	0.603057	0.600755	0.672727	0.602198	0.0136054	0.0498866	0.0816327	0.0226757	0.0385488	0.0566893	0.0272109	0.0181406	0.0680272	0.0952381	0.0929705	0.0272109	0.00907029	0.047619	0.0498866	0.0136054	0.0793651	0.0294785	0.0907029	0.0589569	0.102041	0.0589569	0.0362812	0.0793651	0.0294785	0.0408163	0.0408163	0.0204082	0.0226757	0.0657596	0.0952381	0.0249433	0.0680272	0.0430839	0.104308	0.0272109
SLC27A1	ENST00000252595.12	full-splice_match	1	0	0	3514	1938	17	1559	0.628344	0.655653	0.611111	0.594612	0.00930233	0.020155	0.0341085	0.0108527	0.0387597	0.0651163	0.0341085	0.0186047	0.0356589	0.0573643	0.0635659	0.0248062	0.00155039	0.0434109	0.0341085	0.00465116	0.0372093	0.048062	0.0744186	0.0403101	0.0666667	0.0403101	0.0635659	0.0821705	0.0341085	0.075969	0.0868217	0.0418605	0.0294574	0.0449612	0.122481	0.0434109	0.0232558	0.055814	0.0620155	0.0248062
USHBP1	ENST00000252597.8	full-splice_match	1	0	0	3289	2109	123	1057	0.59775	0.635199	0.564516	0.526963	0.00997151	0.019943	0.0712251	0.00997151	0.039886	0.034188	0.0128205	0.022792	0.0584046	0.138177	0.111111	0.0327635	0.00569801	0.0156695	0.0384615	0.014245	0.0327635	0.048433	0.148148	0.0327635	0.0840456	0.0811966	0.0441595	0.0726496	0.0327635	0.022792	0.037037	0.00997151	0.0128205	0.0655271	0.112536	0.0270655	0.0641026	0.0327635	0.106838	0.025641
MRPL34	ENST00000252602.2	full-splice_match	1	0	0	764	276	21	467	0.544503	0.683636	0.636364	0.458244	0.010989	0.032967	0.0549451	0.021978	0.021978	0.010989	0.0549451	0	0.021978	0.0879121	0.0659341	0.032967	0	0.043956	0.021978	0	0.0769231	0.043956	0.0879121	0.032967	0.0549451	0.0769231	0.0989011	0.0659341	0.032967	0.0989011	0.0879121	0.021978	0	0.043956	0.10989	0.021978	0.032967	0.010989	0.0549451	0.010989
MLLT1	ENST00000252674.9	full-splice_match	1	0	0	4532	1677	191	2664	0.63504	0.629475	0.854167	0.622748	0.0179211	0.0340502	0.107527	0.0107527	0.0430108	0.0824373	0.0322581	0.0376344	0.0734767	0.103943	0.102151	0.0268817	0	0.0179211	0.0197133	0.00358423	0.103943	0.0752688	0.0734767	0.016129	0.125448	0.0860215	0.0681004	0.0663082	0.0555556	0.0412186	0.0483871	0.0215054	0.0107527	0.0681004	0.0698925	0.0340502	0.046595	0.0698925	0.116487	0.0143369
FUT5	ENST00000252675.6	full-splice_match	1	0	0	1916	1122	16	778	0.631002	0.643176	0.588235	0.614396	0	0.0294906	0.0375335	0.0080429	0.0294906	0.080429	0.0482574	0.0509383	0.0348525	0.0697051	0.0509383	0.0160858	0.0080429	0.0375335	0.0268097	0	0.0482574	0.0670241	0.0831099	0.0321716	0.0938338	0.0938338	0.075067	0.0831099	0.0375335	0.0589812	0.0536193	0.0241287	0.0348525	0.0455764	0.144772	0.0348525	0.0241287	0.0670241	0.0428954	0.0241287
ACTN4	ENST00000252699.7	full-splice_match	1	0	0	4990	2733	97	2160	0.585772	0.601391	0.755102	0.558333	0.0131868	0.0450549	0.0681319	0.0164835	0.0450549	0.0835165	0.0417582	0.0307692	0.0659341	0.0901099	0.0769231	0.0241758	0.0120879	0.0571429	0.0483516	0.010989	0.0758242	0.0505495	0.0879121	0.0648352	0.1	0.0472527	0.0483516	0.0703297	0.0494505	0.0516484	0.0527473	0.0175824	0.0186813	0.0362637	0.0912088	0.032967	0.0494505	0.0802198	0.0967033	0.0362637
ZNF655	ENST00000252713.9	full-splice_match	1	0	0	4518	1473	173	2872	0.400398	0.40625	0.689655	0.379875	0.0938776	0.044898	0.0938776	0.0897959	0.0734694	0.0408163	0.00408163	0.0408163	0.116327	0.0653061	0.0408163	0.077551	0.0510204	0.0489796	0.0836735	0.0489796	0.0571429	0.0367347	0.106122	0.0653061	0.044898	0.022449	0.00612245	0.0510204	0.0102041	0	0.00204082	0.00816327	0.0346939	0.0306122	0.0387755	0.0510204	0.122449	0.0346939	0.0795918	0.0387755
EPO	ENST00000252723.3	full-splice_match	1	0	0	1662	579	513	570	0.639591	0.605536	0.758755	0.566667	0.0208333	0.0208333	0.0520833	0.0364583	0.0416667	0.0208333	0.0208333	0.046875	0.046875	0.0729167	0.0729167	0.03125	0.015625	0.0260417	0.03125	0.0104167	0.03125	0.0677083	0.0989583	0.015625	0.0729167	0.0572917	0.046875	0.114583	0.03125	0.0260417	0.0364583	0.015625	0.0104167	0.09375	0.166667	0.0416667	0.0677083	0.03125	0.0625	0.015625
CACNG6	ENST00000252729.7	full-splice_match	1	0	0	2501	780	1241	480	0.630548	0.668806	0.639291	0.545833	0.019305	0.023166	0.046332	0.011583	0.023166	0.046332	0.034749	0.015444	0.034749	0.0579151	0.0540541	0.030888	0.003861	0.019305	0.015444	0.011583	0.034749	0.0656371	0.0540541	0.019305	0.03861	0.0501931	0.0810811	0.0926641	0.023166	0.046332	0.104247	0.034749	0.011583	0.042471	0.15444	0.034749	0.03861	0.015444	0.0772201	0.011583
ZSWIM6	ENST00000252744.6	full-splice_match	1	0	0	5518	3645	15	1858	0.471366	0.544457	0.6875	0.326157	0.0420099	0.0453048	0.0453048	0.0411862	0.0634267	0.0485997	0.0197694	0.0469522	0.0461285	0.068369	0.0345964	0.0395387	0.0263591	0.038715	0.0560132	0.0337727	0.0634267	0.0551895	0.0741351	0.0568369	0.0584843	0.0362438	0.0444811	0.0527183	0.0205931	0.0494234	0.0766063	0.0140033	0.0271829	0.0510708	0.0766063	0.0362438	0.0469522	0.0453048	0.0469522	0.0345964
ZNF764	ENST00000252797.6	full-splice_match	1	0	0	2738	1224	81	1433	0.584368	0.691742	0.682927	0.48709	0.02457	0.019656	0.039312	0.004914	0.036855	0.0786241	0.031941	0.027027	0.04914	0.0761671	0.041769	0.022113	0.002457	0.014742	0.014742	0.004914	0.027027	0.0663391	0.0663391	0.012285	0.0786241	0.108108	0.108108	0.0835381	0.027027	0.0810811	0.113022	0.034398	0.019656	0.044226	0.108108	0.039312	0.036855	0.0565111	0.0835381	0.012285
ZNF747	ENST00000252799.3	full-splice_match	1	0	0	3936	573	668	2695	0.57749	0.704545	0.599402	0.545083	0.0263158	0.0157895	0.0578947	0	0.0263158	0.0421053	0.0263158	0.0105263	0.0578947	0.0578947	0.0736842	0.0315789	0	0.0263158	0.0105263	0.00526316	0.0210526	0.0157895	0.0631579	0.0105263	0.0473684	0.1	0.126316	0.0947368	0.0368421	0.0631579	0.105263	0.0421053	0.00526316	0.0684211	0.1	0.0210526	0.0526316	0.0578947	0.0947368	0.0315789
PXDN	ENST00000252804.9	full-splice_match	1	0	0	6817	4437	60	2320	0.552296	0.585437	0.786885	0.482759	0.0230041	0.0500677	0.0324763	0.0277402	0.0588633	0.0751015	0.0487145	0.02977	0.0602165	0.0602165	0.0480379	0.026387	0.0101488	0.0541272	0.0385656	0.0216509	0.0453315	0.067659	0.0953992	0.0520974	0.0778078	0.0548038	0.056157	0.0635995	0.0372124	0.0514208	0.0622463	0.0290934	0.0182679	0.0500677	0.082544	0.037889	0.0548038	0.0690122	0.056157	0.0324763
LSM4	ENST00000252816.10	full-splice_match	1	0	0	986	375	51	560	0.586207	0.631016	0.826923	0.533929	0.0241935	0.0322581	0.0725806	0.016129	0.0806452	0.0322581	0.0322581	0.00806452	0.0725806	0.0725806	0.0967742	0.0322581	0	0.0564516	0.0483871	0.00806452	0.0564516	0.0322581	0.112903	0.0645161	0.0403226	0.0241935	0.0806452	0.0403226	0.0645161	0.0483871	0.0806452	0.016129	0.00806452	0	0.0887097	0	0.0564516	0.0645161	0.104839	0.0322581
JUND	ENST00000252818.5	full-splice_match	1	0	0	1929	1041	138	750	0.699326	0.734615	0.892086	0.614667	0.00867052	0.0231214	0.0578035	0	0.0231214	0.0404624	0.0606936	0	0.0260116	0.112717	0.0433526	0.0260116	0	0.017341	0.0115607	0.00289017	0.0433526	0.0462428	0.0751445	0.0231214	0.0578035	0.0780347	0.124277	0.0751445	0.066474	0.176301	0.118497	0.0231214	0.0144509	0.0520231	0.0895954	0.0202312	0.0375723	0.0404624	0.0751445	0.00867052
HRC	ENST00000252825.9	full-splice_match	1	0	0	2357	2097	159	101	0.564277	0.565363	0.5625	0.544554	0.02149	0.0243553	0.0945559	0.00859599	0.0616046	0.0716332	0.0186246	0.025788	0.103152	0.0530086	0.17765	0.0272206	0.00859599	0.0315186	0.113181	0.00859599	0.034384	0.103152	0.104585	0.0573066	0.140401	0.0472779	0.0200573	0.030086	0.0229226	0.0114613	0.0186246	0.00716332	0.012894	0.0444126	0.0544413	0.0143266	0.0916905	0.0458453	0.15616	0.0816619
TRPM4	ENST00000252826.10	full-splice_match	1	0	0	4058	3642	75	341	0.635042	0.63554	0.789474	0.595308	0.00824402	0.0214345	0.0370981	0.0115416	0.0370981	0.0486397	0.0321517	0.0288541	0.0370981	0.0610058	0.0560594	0.0263809	0.00659522	0.0296785	0.0379225	0.0148392	0.0280297	0.0511129	0.0692498	0.0379225	0.063479	0.0618302	0.059357	0.0948063	0.0263809	0.0544106	0.0667766	0.0354493	0.0197857	0.0667766	0.11789	0.0461665	0.0379225	0.0535862	0.063479	0.0305029
CEP85	ENST00000252992.8	full-splice_match	1	0	0	3935	2286	131	1518	0.515121	0.519475	0.590909	0.501976	0.0420499	0.0341656	0.088042	0.0367937	0.0591327	0.0459921	0.0065703	0.0341656	0.110381	0.0998686	0.065703	0.0565046	0.0144547	0.0367937	0.0381078	0.0407359	0.0486202	0.0525624	0.13929	0.0394218	0.0775296	0.0394218	0.0197109	0.0617608	0.0170828	0.0144547	0.0157687	0.0131406	0.0183968	0.0512484	0.0762155	0.0486202	0.0972405	0.0446781	0.0932983	0.0407359
TAF4	ENST00000252996.9	full-splice_match	1	0	0	4699	3255	71	1373	0.581613	0.66933	0.75	0.364894	0.0322878	0.0415129	0.0479705	0.0230627	0.0350554	0.0562731	0.0378229	0.0230627	0.0553506	0.0830258	0.045203	0.0221402	0.0110701	0.0221402	0.0304428	0.0147601	0.0424354	0.0571956	0.108856	0.0202952	0.0765683	0.110701	0.139299	0.054428	0.0239852	0.129151	0.099631	0.0193727	0.0110701	0.0461255	0.0590406	0.0267528	0.0535055	0.0396679	0.0433579	0.0230627
GATA5	ENST00000252997.3	full-splice_match	1	0	0	2620	1191	87	1342	0.635496	0.705042	0.761364	0.565574	0.00757576	0.0151515	0.040404	0.010101	0.0277778	0.0505051	0.030303	0.0328283	0.0277778	0.0732323	0.0479798	0.0227273	0	0.010101	0.030303	0.00252525	0.0353535	0.0606061	0.0808081	0.0126263	0.0934343	0.0909091	0.108586	0.111111	0.0378788	0.0934343	0.106061	0.0328283	0.0227273	0.0732323	0.0883838	0.0378788	0.030303	0.0353535	0.0505051	0.0176768
RBBP8NL	ENST00000252998.2	full-splice_match	1	0	0	2799	1992	163	644	0.672026	0.67554	0.670732	0.661491	0.00904977	0.0271493	0.0558069	0.00603318	0.0452489	0.0769231	0.0271493	0.0286576	0.0693816	0.101056	0.116139	0.025641	0	0.015083	0.0241327	0.0015083	0.0271493	0.0799397	0.144796	0.0241327	0.137255	0.113122	0.0527903	0.0950226	0.0301659	0.0316742	0.0588235	0.00603318	0.00904977	0.0618401	0.113122	0.0180995	0.0603318	0.0633484	0.110106	0.00904977
LAMA5	ENST00000252999.7	full-splice_match	1	0	0	11426	11085	67	274	0.66445	0.669343	0.808824	0.430657	0.00487277	0.0257174	0.0221982	0.00622631	0.0335679	0.0668652	0.0378993	0.0354629	0.0243638	0.0766107	0.0671359	0.0254467	0.00351922	0.0200325	0.0319437	0.00676773	0.0332972	0.0674066	0.102057	0.0289659	0.0923119	0.084732	0.0760693	0.0858148	0.0322144	0.0563075	0.0695723	0.0300487	0.0203032	0.0471034	0.13752	0.0324851	0.0186789	0.0544126	0.0649702	0.0205739
PRDM12	ENST00000253008.3	full-splice_match	1	0	0	2478	1101	60	1317	0.635997	0.668182	0.885246	0.59757	0.00546448	0.0437158	0.0437158	0.00273224	0.0519126	0.0710383	0.0409836	0.0245902	0.0464481	0.0628415	0.0601093	0.0136612	0	0.0464481	0.0355191	0.00273224	0.0546448	0.079235	0.0710383	0.0437158	0.0819672	0.0519126	0.117486	0.0655738	0.0300546	0.139344	0.0737705	0.0273224	0.0163934	0.0519126	0.0928962	0.0382514	0.0327869	0.0382514	0.0655738	0.0355191
ZC3H4	ENST00000253048.10	full-splice_match	1	0	0	6143	3909	62	2172	0.603288	0.646622	0.603175	0.525322	0.016129	0.0261137	0.0691244	0.015361	0.0391705	0.0668203	0.0353303	0.0299539	0.0591398	0.0752688	0.0967742	0.0253456	0.00537634	0.0207373	0.0583717	0.0107527	0.0453149	0.0537634	0.0906298	0.0360983	0.0921659	0.119816	0.0875576	0.0660522	0.0445469	0.0506912	0.0652842	0.0138249	0.0176651	0.0514593	0.0714286	0.0199693	0.0606759	0.0683564	0.0975422	0.0330261
MAP3K10	ENST00000253055.8	full-splice_match	1	0	0	3754	2862	606	286	0.697389	0.685774	0.785832	0.625874	0.00629591	0.023085	0.0472193	0.00524659	0.0293809	0.0545645	0.0377754	0.0262329	0.0398741	0.0797482	0.0671563	0.0262329	0.00419727	0.0272823	0.0262329	0.00524659	0.0377754	0.0577125	0.0755509	0.0293809	0.0797482	0.109129	0.0797482	0.0786988	0.0325289	0.0786988	0.0860441	0.0335782	0.0136411	0.0493179	0.101784	0.0314795	0.0335782	0.0577125	0.0807975	0.023085
HIP1R	ENST00000253083.9	full-splice_match	1	0	0	4509	3204	94	1211	0.624307	0.629722	0.757895	0.599505	0.00749766	0.0234302	0.0637301	0.0121837	0.0487348	0.0515464	0.0337395	0.0187441	0.0665417	0.119963	0.099344	0.0234302	0.00281162	0.0365511	0.0337395	0.0131209	0.0440487	0.059044	0.121837	0.0402999	0.0871603	0.0534208	0.0459231	0.0627929	0.027179	0.0468604	0.059044	0.0149953	0.0149953	0.054358	0.112465	0.0187441	0.0524836	0.0524836	0.114339	0.0309278
SLC6A8	ENST00000253122.10	full-splice_match	1	0	0	3931	1905	649	1377	0.629611	0.608718	0.841538	0.55846	0.011041	0.0268139	0.0315457	0.00788644	0.0347003	0.0567823	0.0347003	0.0362776	0.033123	0.0347003	0.0410095	0.0205047	0.00315457	0.0473186	0.0425868	0.0126183	0.0425868	0.0394322	0.0473186	0.0615142	0.0630915	0.0583596	0.0488959	0.107256	0.0268139	0.044164	0.0362776	0.0394322	0.0362776	0.0488959	0.140379	0.0646688	0.0236593	0.0457413	0.0425868	0.0283912
ZNF236	ENST00000253159.12	full-splice_match	1	0	0	8124	5535	198	2391	0.475012	0.534514	0.432161	0.340862	0.0428416	0.0433839	0.074295	0.0292842	0.0726681	0.0515184	0.0319957	0.0352495	0.0650759	0.0878525	0.0650759	0.0428416	0.021692	0.0336226	0.04718	0.0260304	0.0596529	0.0710412	0.111714	0.0563991	0.0808026	0.0385033	0.0292842	0.0645336	0.0227766	0.0341649	0.032538	0.0211497	0.0238612	0.0536876	0.0759219	0.0357918	0.0645336	0.0477223	0.063449	0.0238612
LRP3	ENST00000253193.9	full-splice_match	1	0	0	4058	2310	456	1292	0.673977	0.688177	0.846827	0.587461	0.00260078	0.0195059	0.0156047	0.00520156	0.029909	0.0611183	0.0416125	0.0312094	0.0377113	0.0689207	0.0663199	0.0221066	0.00260078	0.0195059	0.0273082	0.00780234	0.0208062	0.0572172	0.117035	0.0286086	0.083225	0.0858257	0.0884265	0.0910273	0.0351105	0.0793238	0.0819246	0.0273082	0.0169051	0.0624187	0.128739	0.0351105	0.0195059	0.0650195	0.0585176	0.0182055
UBE4B	ENST00000253251.12	full-splice_match	1	0	0	4772	3519	839	414	0.508801	0.487209	0.611905	0.483092	0.0477816	0.0443686	0.0665529	0.0418089	0.0443686	0.0554608	0.0204778	0.0375427	0.0750853	0.0725256	0.0349829	0.0503413	0.03157	0.0341297	0.0648464	0.0443686	0.0469283	0.0418089	0.0938567	0.0452218	0.0699659	0.0460751	0.028157	0.0571672	0.028157	0.0204778	0.0238908	0.0162116	0.0230375	0.0648464	0.0691126	0.0511945	0.0827645	0.0435154	0.0546075	0.056314
AKAP12	ENST00000253332.5	full-splice_match	1	0	0	6597	5346	189	1062	0.491284	0.512254	0.673684	0.353107	0.0819764	0.0432341	0.138686	0.0308815	0.0527793	0.048849	0.0196519	0.031443	0.129141	0.0875912	0.0982594	0.048849	0.0140371	0.0275126	0.0437956	0.0196519	0.0533408	0.046603	0.108928	0.0241437	0.0679394	0.0376193	0.0359349	0.0409882	0.0297586	0.01516	0.0235823	0.0145985	0.0157215	0.0387423	0.0685008	0.0258282	0.139248	0.048849	0.103874	0.0398652
LATS1	ENST00000253339.9	full-splice_match	1	0	0	4256	3390	228	638	0.401786	0.424609	0.336245	0.304075	0.085031	0.0566873	0.0752879	0.0788308	0.0699734	0.0522586	0.00974314	0.0398583	0.0735164	0.0558016	0.0380868	0.0504872	0.044287	0.0540301	0.0761736	0.0664305	0.0832595	0.0460585	0.0664305	0.0575731	0.0628875	0.0265722	0.0106289	0.0602303	0.0194863	0.00797166	0.00797166	0.00797166	0.0434012	0.0460585	0.0628875	0.0451727	0.0779451	0.0354296	0.044287	0.0575731
ARHGEF9	ENST00000253401.10	full-splice_match	1	0	0	5413	1548	801	3064	0.477	0.505495	0.551122	0.443211	0.0407767	0.0427184	0.0640777	0.0330097	0.0524272	0.0640777	0.0252427	0.0407767	0.0796117	0.0582524	0.0737864	0.0407767	0.023301	0.0407767	0.0718447	0.0349515	0.0621359	0.0407767	0.0970874	0.038835	0.0640777	0.0271845	0.023301	0.0563107	0.023301	0.0213592	0.023301	0.0135922	0.0349515	0.0349515	0.0834951	0.0504854	0.0563107	0.0640777	0.0854369	0.0757282
GFAP	ENST00000253408.11	full-splice_match	1	0	0	3154	1416	14	1724	0.58941	0.607067	0.6	0.574826	0.0191083	0.0403397	0.0721868	0.0212314	0.0424628	0.07431	0.0360934	0.014862	0.0849257	0.0764331	0.101911	0.029724	0.0106157	0.0318471	0.0467091	0.0127389	0.0721868	0.0552017	0.089172	0.0191083	0.0785563	0.0382166	0.059448	0.0679406	0.044586	0.0636943	0.0424628	0.0212314	0.014862	0.0615711	0.10828	0.0169851	0.0573248	0.0509554	0.118896	0.0509554
CCL25	ENST00000253451.9	full-splice_match	1	0	0	958	447	111	400	0.575157	0.56278	0.651786	0.5675	0.0337838	0.027027	0.0878378	0.0337838	0.027027	0.0608108	0.00675676	0.0337838	0.0337838	0.0743243	0.0810811	0.0337838	0.0202703	0.0472973	0.027027	0.0202703	0.0675676	0.0405405	0.0675676	0.0337838	0.0945946	0.0540541	0.027027	0.108108	0.0135135	0.0202703	0.027027	0.00675676	0.027027	0.0675676	0.141892	0.027027	0.0540541	0.0337838	0.0675676	0.027027
GSE1	ENST00000253458.12	full-splice_match	1	0	0	7385	3651	70	3664	0.542586	0.647945	0.619718	0.436135	0.0164474	0.0263158	0.0608553	0.00904605	0.0353618	0.0756579	0.0205592	0.0279605	0.0567434	0.124178	0.0838816	0.0271382	0.00411184	0.0180921	0.0328947	0.00657895	0.0419408	0.0707237	0.105263	0.0271382	0.106086	0.0978618	0.0690789	0.0814145	0.0353618	0.0509868	0.0583882	0.0304276	0.0222039	0.0542763	0.0879934	0.0271382	0.0526316	0.0394737	0.115954	0.0205592
IDO1	ENST00000253513.11	full-splice_match	1	1	1	1525	510	54	961	0.434098	0.434185	0.490909	0.430801	0.0887574	0.0532544	0.0828402	0.035503	0.0591716	0.0236686	0.0177515	0.0532544	0.0828402	0.0177515	0.0295858	0.0591716	0.035503	0.0532544	0.0828402	0.0532544	0.0473373	0.0414201	0.0532544	0.0769231	0.0532544	0	0.00591716	0.0532544	0.00591716	0.0118343	0	0.0236686	0.0414201	0.0532544	0.0946746	0.0414201	0.0769231	0.035503	0.0414201	0.0591716
TBC1D5	ENST00000253692.11	full-splice_match	1	0	0	7854	2385	1665	3804	0.445378	0.449664	0.427971	0.450315	0.0680101	0.0566751	0.0881612	0.0566751	0.0566751	0.0377834	0.0125945	0.0478589	0.0919395	0.0629723	0.059194	0.0390428	0.0277078	0.0403023	0.0617128	0.0654912	0.0755668	0.0365239	0.0969773	0.0453401	0.0755668	0.0277078	0.0100756	0.0617128	0.0151134	0.00503778	0.0100756	0.00755668	0.034005	0.0491184	0.0667506	0.0566751	0.0881612	0.034005	0.0428212	0.0629723
RBSN	ENST00000253699.7	full-splice_match	1	0	0	6678	2352	614	3712	0.486972	0.545725	0.504065	0.446929	0.0383142	0.0421456	0.0804598	0.0229885	0.0510856	0.0536398	0.0204342	0.0319285	0.083014	0.0893997	0.0970626	0.0498084	0.0153257	0.0434227	0.0434227	0.0166028	0.0472542	0.045977	0.12516	0.0446999	0.0740741	0.0561941	0.0255428	0.063857	0.0280971	0.0204342	0.0229885	0.0063857	0.0166028	0.0472542	0.0779055	0.054917	0.0804598	0.0498084	0.10728	0.037037
NAPSA	ENST00000253719.7	full-splice_match	1	0	0	1357	1260	18	79	0.595431	0.596505	0.684211	0.556962	0.0143198	0.0238663	0.0310263	0.0238663	0.0334129	0.0453461	0.0214797	0.0429594	0.026253	0.0477327	0.0477327	0.026253	0.00954654	0.052506	0.0453461	0.0286396	0.0357995	0.0453461	0.0572792	0.0453461	0.0787589	0.0739857	0.0381862	0.105012	0.0167064	0.0381862	0.0477327	0.0238663	0.0190931	0.0739857	0.124105	0.052506	0.0381862	0.0405728	0.052506	0.052506
NR1H2	ENST00000253727.10	full-splice_match	1	0	0	2416	1380	247	789	0.614238	0.633793	0.633065	0.574144	0.0130719	0.0326797	0.0610022	0.0043573	0.0348584	0.037037	0.0413943	0.0261438	0.0522876	0.0827887	0.08061	0.043573	0.00217865	0.043573	0.0305011	0.00217865	0.0457516	0.0479303	0.126362	0.0326797	0.0762527	0.0631808	0.0588235	0.0762527	0.0348584	0.0675381	0.0544662	0.0261438	0.0261438	0.0457516	0.102397	0.0501089	0.043573	0.0413943	0.0740741	0.0348584
RAMP2	ENST00000253796.10	full-splice_match	1	0	0	752	525	35	192	0.577128	0.589695	0.75	0.510417	0.0172414	0.0114943	0.0287356	0.0287356	0.0229885	0.045977	0.0114943	0.045977	0.0574713	0.0517241	0.0747126	0.0287356	0.0172414	0.0747126	0.0344828	0.0287356	0.0229885	0.0574713	0.0804598	0.045977	0.0862069	0.091954	0.0344828	0.12069	0.0287356	0.0344828	0.0402299	0.00574713	0.0172414	0.091954	0.091954	0.0574713	0.0344828	0.045977	0.0747126	0.0517241
AOC2	ENST00000253799.8	full-splice_match	1	0	0	2677	2268	47	362	0.549496	0.579621	0.479167	0.370166	0.018543	0.0291391	0.0291391	0.015894	0.0450331	0.0715232	0.0119205	0.0423841	0.0317881	0.0715232	0.0622517	0.0357616	0.0145695	0.0384106	0.0397351	0.0145695	0.0331126	0.0543046	0.0927152	0.0437086	0.0847682	0.0860927	0.0251656	0.0953642	0.015894	0.013245	0.0304636	0.0145695	0.0397351	0.0529801	0.107285	0.0622517	0.0331126	0.0516556	0.0596026	0.0225166
PCDHAC1	ENST00000253807.3	full-splice_match	1	0	0	5896	2889	594	2413	0.48728	0.536704	0.685714	0.379196	0.029106	0.037422	0.0467775	0.0405405	0.049896	0.0519751	0.0259875	0.0540541	0.047817	0.0623701	0.0571726	0.049896	0.0176715	0.0363825	0.0405405	0.0280665	0.0550936	0.047817	0.0893971	0.027027	0.0675676	0.0467775	0.037422	0.0613306	0.029106	0.031185	0.039501	0.014553	0.0322245	0.049896	0.0883576	0.0592516	0.049896	0.0665281	0.0550936	0.0343035
PPFIA1	ENST00000253925.12	full-splice_match	1	0	0	5240	3606	225	1409	0.478244	0.499029	0.818584	0.370476	0.0766028	0.0499584	0.100749	0.0383014	0.0691091	0.0324729	0.029975	0.041632	0.108243	0.0707744	0.0632806	0.041632	0.0191507	0.0316403	0.0616153	0.0291424	0.0549542	0.0524563	0.0932556	0.0399667	0.0574521	0.0349709	0.0233139	0.0449625	0.0291424	0.0233139	0.0233139	0.0149875	0.0224813	0.0399667	0.062448	0.0574521	0.10408	0.0566195	0.0724396	0.050791
FLYWCH1	ENST00000253928.14	full-splice_match	1	0	0	5043	2148	411	2484	0.642673	0.678156	0.723301	0.598631	0.0111888	0.013986	0.0545455	0	0.0251748	0.0503497	0.034965	0.0251748	0.048951	0.0853147	0.107692	0.0363636	0.0041958	0.0181818	0.0293706	0.00839161	0.0307692	0.0503497	0.107692	0.027972	0.0923077	0.0923077	0.0727273	0.0979021	0.034965	0.041958	0.0713287	0.0153846	0.00979021	0.0293706	0.127273	0.0181818	0.0363636	0.0545455	0.113287	0.0251748
BARX1	ENST00000253968.11	full-splice_match	1	0	0	1511	762	209	540	0.697551	0.689882	0.866667	0.642593	0.0158103	0.0158103	0.0711462	0.0158103	0.0158103	0.0474308	0.0197628	0.0158103	0.0513834	0.106719	0.083004	0.0355731	0.00790514	0.0158103	0.0158103	0.00790514	0.0395257	0.0513834	0.0909091	0.00395257	0.0790514	0.0592885	0.110672	0.0395257	0.0434783	0.110672	0.118577	0.0197628	0.00395257	0.0237154	0.110672	0.027668	0.0632411	0.0197628	0.110672	0.0237154
WDR44	ENST00000254029.8	full-splice_match	1	0	0	4114	2739	398	977	0.403014	0.412345	0.631579	0.283521	0.0877193	0.0460526	0.108553	0.0635965	0.0548246	0.0471491	0.0142544	0.0504386	0.0953947	0.0438596	0.0350877	0.0657895	0.0515351	0.0383772	0.0767544	0.0515351	0.0712719	0.0339912	0.0690789	0.0361842	0.0471491	0.0208333	0.0109649	0.0515351	0.0120614	0.00877193	0.0109649	0.00877193	0.0361842	0.0372807	0.058114	0.0504386	0.105263	0.0361842	0.0449561	0.0789474
CKMT2	ENST00000254035.9	full-splice_match	1	0	0	1476	1257	76	143	0.512873	0.533439	0.571429	0.300699	0.0287081	0.0454545	0.0717703	0.0263158	0.0430622	0.0669856	0.0382775	0.0358852	0.0598086	0.0550239	0.0645933	0.0406699	0.0263158	0.0430622	0.0526316	0.0334928	0.062201	0.0478469	0.0645933	0.0502392	0.0717703	0.0358852	0.0382775	0.062201	0.0406699	0.0311005	0.0287081	0.0191388	0.0406699	0.0311005	0.0909091	0.0287081	0.0454545	0.0645933	0.069378	0.0550239
ZCCHC9	ENST00000254037.6	full-splice_match	1	0	0	4606	813	3155	638	0.411203	0.423645	0.430925	0.297806	0.12963	0.0592593	0.125926	0.0888889	0.0777778	0.0555556	0.00740741	0.0222222	0.111111	0.0296296	0.0444444	0.0481481	0.0333333	0.0222222	0.0851852	0.0518519	0.0962963	0.0333333	0.0518519	0.037037	0.0407407	0.037037	0.0185185	0.0518519	0.0185185	0.0148148	0.0148148	0.0037037	0.0333333	0.0148148	0.0333333	0.037037	0.118519	0.0444444	0.037037	0.0481481
TNS4	ENST00000254051.11	full-splice_match	1	0	0	4087	2145	185	1757	0.578909	0.603545	0.569892	0.549801	0.0238095	0.0308123	0.0462185	0.012605	0.0406162	0.0728291	0.012605	0.0434174	0.0616246	0.0966387	0.0728291	0.0266106	0.00840336	0.0406162	0.0434174	0.0070028	0.0420168	0.0658263	0.133053	0.0546218	0.147059	0.106443	0.0238095	0.0980392	0.0182073	0.0182073	0.0182073	0.0168067	0.00980392	0.0798319	0.0994398	0.0490196	0.0406162	0.0532213	0.0742297	0.0252101
RARA	ENST00000254066.10	full-splice_match	1	0	0	3275	1386	469	1420	0.619237	0.618051	0.63617	0.614789	0.0151844	0.0390456	0.0650759	0.00867679	0.0563991	0.0802603	0.032538	0.0281996	0.0585683	0.0889371	0.0498915	0.0303688	0.00650759	0.0368764	0.0368764	0.010846	0.0520607	0.0607375	0.0976139	0.0477223	0.0954447	0.0802603	0.0629067	0.0802603	0.021692	0.0607375	0.0563991	0.00650759	0.0238612	0.0672451	0.10846	0.032538	0.0542299	0.0672451	0.0563991	0.0303688
ZNF132	ENST00000254166.4	full-splice_match	1	0	0	2962	2118	332	512	0.491897	0.475673	0.624625	0.472656	0.0723404	0.0368794	0.0851064	0.0510638	0.0567376	0.0496454	0.0070922	0.0510638	0.0836879	0.0836879	0.0425532	0.0680851	0.0198582	0.035461	0.0595745	0.0340426	0.0340426	0.0723404	0.0950355	0.058156	0.0680851	0.0297872	0.00851064	0.0751773	0.00992908	0.00425532	0.00992908	0.00425532	0.0113475	0.048227	0.0567376	0.0808511	0.107801	0.0198582	0.0808511	0.0198582
ZNF211	ENST00000254182.11	full-splice_match	1	0	0	1959	1665	193	101	0.46146	0.459135	0.520619	0.386139	0.0884477	0.0469314	0.0703971	0.066787	0.0740072	0.0451264	0.00722022	0.0523466	0.0830325	0.0523466	0.0505415	0.0740072	0.0216606	0.0469314	0.0758123	0.0234657	0.0505415	0.066787	0.0884477	0.0613718	0.0577617	0.0108303	0.00722022	0.0830325	0.00722022	0.00722022	0.0108303	0.00722022	0.0216606	0.0415162	0.0523466	0.066787	0.113718	0.0252708	0.0685921	0.0144404
CHSY1	ENST00000254190.4	full-splice_match	1	0	0	4662	2406	592	1664	0.502574	0.528898	0.804384	0.356971	0.0474407	0.0349563	0.0611735	0.0449438	0.0586767	0.0411985	0.0249688	0.0287141	0.0686642	0.0599251	0.0499376	0.0486891	0.019975	0.0387016	0.062422	0.031211	0.0661673	0.0324594	0.0811486	0.0436954	0.0699126	0.0474407	0.0399501	0.0549313	0.0287141	0.0324594	0.0374532	0.0262172	0.0149813	0.0411985	0.0724095	0.051186	0.0599251	0.0486891	0.0761548	0.0411985
LIN28A	ENST00000254231.4	full-splice_match	1	1	0	3458	627	75	2756	0.477444	0.599042	0.75	0.442308	0.0240385	0.0192308	0.105769	0.0192308	0.0288462	0.0480769	0.0192308	0.0144231	0.0817308	0.0769231	0.105769	0.0528846	0.00480769	0.0384615	0.0432692	0.00961538	0.0528846	0.0480769	0.0961538	0.0528846	0.0913462	0.0576923	0.0576923	0.0432692	0.0192308	0.0480769	0.0673077	0.0144231	0.0240385	0.0240385	0.0673077	0.0288462	0.0769231	0.0288462	0.0913462	0.0144231
ADCY7	ENST00000254235.7	full-splice_match	1	0	0	6138	3240	268	2630	0.540241	0.609756	0.66171	0.442205	0.012975	0.0305839	0.0509731	0.0111214	0.0370714	0.0593142	0.0398517	0.0389249	0.0407785	0.0620945	0.0537535	0.0315107	0.00185357	0.0407785	0.0509731	0.0101946	0.0518999	0.0583874	0.0695088	0.0583874	0.0834106	0.0500463	0.0379981	0.094532	0.0333642	0.0398517	0.0518999	0.0352178	0.02595	0.0528267	0.125116	0.0398517	0.0361446	0.0537535	0.0648749	0.0250232
RHPN2	ENST00000254260.8	full-splice_match	1	0	0	3501	2058	36	1407	0.476435	0.551288	0.810811	0.358209	0.0335766	0.0364964	0.0773723	0.020438	0.0481752	0.0394161	0.0394161	0.0408759	0.0788321	0.0744526	0.0613139	0.0321168	0.0145985	0.0423358	0.0423358	0.0306569	0.0379562	0.0510949	0.0875912	0.0437956	0.0715328	0.0437956	0.0335766	0.070073	0.0262774	0.0291971	0.0510949	0.020438	0.0218978	0.0554745	0.0948905	0.0540146	0.0817518	0.0510949	0.0715328	0.0467153
FAAP24	ENST00000254262.9	full-splice_match	1	1	0	875	207	151	517	0.544	0.5	0.625	0.537718	0.0882353	0.0147059	0.0735294	0.102941	0.0294118	0.0294118	0.0294118	0	0.102941	0.0294118	0.0588235	0	0.0441176	0.0147059	0.102941	0.0735294	0.0441176	0.0441176	0.0588235	0.0294118	0.0294118	0.0441176	0.0294118	0.0294118	0.0147059	0.0294118	0.0441176	0.0294118	0.0147059	0	0.0588235	0.0588235	0.117647	0	0.0441176	0.0735294
PODNL1	ENST00000254320.7	full-splice_match	1	0	0	1859	1290	216	353	0.644432	0.667184	0.723502	0.512748	0.002331	0.0675991	0.013986	0.011655	0.0559441	0.0979021	0.018648	0.018648	0.016317	0.0932401	0.032634	0.018648	0.00699301	0.030303	0.018648	0.004662	0.0675991	0.0722611	0.0932401	0.025641	0.0979021	0.0909091	0.0955711	0.13986	0.025641	0.0699301	0.0629371	0.025641	0.020979	0.100233	0.142191	0.020979	0.018648	0.032634	0.044289	0.013986
ZNF700	ENST00000254321.10	full-splice_match	1	0	0	2843	2226	104	513	0.417165	0.413483	0.67619	0.380117	0.11471	0.0539811	0.112011	0.071525	0.0620783	0.0472335	0.00404858	0.0472335	0.0850202	0.0539811	0.0472335	0.0445344	0.048583	0.0323887	0.112011	0.0431849	0.0499325	0.0458839	0.048583	0.071525	0.0337382	0.0310391	0.00404858	0.0661269	0.0107962	0.00404858	0.00539811	0.00269906	0.0269906	0.0350877	0.0472335	0.0674764	0.140351	0.0350877	0.0526316	0.0283401
ZSWIM4	ENST00000254323.6	full-splice_match	1	0	0	4339	2967	189	1183	0.634248	0.65644	0.805263	0.551141	0.00607287	0.0253036	0.0323887	0.00910931	0.0263158	0.0657895	0.0354251	0.0394737	0.041498	0.0789474	0.0546559	0.0182186	0.00506073	0.0313765	0.0354251	0.0121457	0.0323887	0.0637652	0.082996	0.0394737	0.0819838	0.0738866	0.0678138	0.0799595	0.0334008	0.0789474	0.0678138	0.0242915	0.0192308	0.0566802	0.135628	0.0273279	0.0323887	0.0495951	0.0738866	0.0242915
RFX1	ENST00000254325.9	full-splice_match	1	0	0	4375	2937	270	1168	0.650514	0.667575	0.597786	0.619863	0.00613497	0.0245399	0.0408998	0.00511247	0.0378323	0.0736196	0.0398773	0.0316973	0.0388548	0.116564	0.0736196	0.0286299	0.00204499	0.0245399	0.0265849	0.00306748	0.0511247	0.0756646	0.149284	0.0327198	0.139059	0.0746421	0.0654397	0.0593047	0.0296524	0.0674847	0.0695297	0.0378323	0.0194274	0.0572597	0.0828221	0.0224949	0.0194274	0.0470348	0.0644172	0.0122699
SMARCC1	ENST00000254480.10	full-splice_match	1	0	0	6354	3315	96	2943	0.464747	0.48793	0.773196	0.428474	0.0733696	0.0498188	0.0951087	0.0443841	0.0570652	0.0606884	0.0144928	0.0344203	0.0905797	0.0679348	0.0543478	0.0461957	0.0244565	0.0335145	0.0815217	0.0416667	0.053442	0.0480072	0.0869565	0.0507246	0.0733696	0.0425725	0.0190217	0.0652174	0.0144928	0.0126812	0.0344203	0.00815217	0.0253623	0.0434783	0.0625	0.0380435	0.116848	0.0353261	0.057971	0.0625
SLC6A11	ENST00000254488.7	full-splice_match	1	0	0	4249	1896	38	2315	0.541304	0.560422	0.820513	0.52095	0.0110935	0.0364501	0.0459588	0.0142631	0.0554675	0.0475436	0.0269414	0.0301109	0.0316957	0.0459588	0.0475436	0.0364501	0.00792393	0.0554675	0.0554675	0.0332805	0.0427892	0.0364501	0.0538827	0.0760697	0.0538827	0.0412044	0.0348653	0.0729002	0.0158479	0.0348653	0.0475436	0.0237718	0.0348653	0.0475436	0.114105	0.0427892	0.044374	0.0427892	0.0618067	0.0364501
NUP210	ENST00000254508.7	full-splice_match	1	0	0	7206	5661	96	1449	0.58368	0.592756	0.845361	0.530711	0.0153765	0.0312831	0.0461294	0.0132556	0.0540827	0.0641569	0.02386	0.0339343	0.0408271	0.0657476	0.0763521	0.0275716	0.00742312	0.052492	0.0355249	0.0169671	0.0440085	0.0683987	0.102863	0.0567338	0.103924	0.0652174	0.0471898	0.0816543	0.02386	0.0296925	0.0424178	0.028632	0.0222694	0.0599152	0.0938494	0.0440085	0.0392365	0.0514316	0.0599152	0.0307529
EMILIN2	ENST00000254528.4	full-splice_match	1	0	0	5944	3159	183	2602	0.546602	0.562065	0.777174	0.51153	0.0418251	0.0484791	0.0712928	0.0313688	0.0541825	0.0494297	0.0304183	0.0285171	0.081749	0.0712928	0.0760456	0.0408745	0.0171103	0.0247148	0.0494297	0.0247148	0.0522814	0.0418251	0.115019	0.03327	0.0703422	0.0560837	0.0456274	0.0532319	0.0218631	0.0446768	0.039924	0.0190114	0.0180608	0.0513308	0.0741445	0.0361217	0.0855513	0.0503802	0.0665399	0.0380228
DNHD1	ENST00000254579.11	full-splice_match	1	0	0	14876	14259	580	37	0.562113	0.56172	0.581756	0.405405	0.0216751	0.0345118	0.0538721	0.0204125	0.0431397	0.0526094	0.0149411	0.0465067	0.0578704	0.0833333	0.0664983	0.0433502	0.0143098	0.03367	0.0462963	0.020202	0.0458754	0.0555556	0.108165	0.0446128	0.084596	0.0593434	0.0183081	0.0875421	0.0170455	0.0189394	0.0189394	0.0113636	0.0311448	0.0549242	0.128577	0.0502946	0.0502946	0.0391414	0.0694444	0.0309343
EFR3A	ENST00000254624.10	full-splice_match	1	0	0	5433	2463	220	2750	0.382477	0.416328	0.769231	0.321091	0.0646341	0.05	0.0768293	0.0646341	0.0487805	0.0365854	0.0109756	0.045122	0.0841463	0.0353659	0.0414634	0.045122	0.0536585	0.0536585	0.0695122	0.0743902	0.0634146	0.0256098	0.0695122	0.0658537	0.0585366	0.0170732	0.00853659	0.0365854	0.0207317	0.00853659	0.00609756	0.0158537	0.0256098	0.0292683	0.0670732	0.0585366	0.097561	0.0353659	0.0378049	0.0682927
PER2	ENST00000254657.8	full-splice_match	1	0	0	6380	3765	281	2334	0.524451	0.569075	0.716312	0.429306	0.0422648	0.0287081	0.0669856	0.030303	0.0494418	0.0598086	0.0279107	0.0287081	0.069378	0.0940989	0.0566188	0.0486443	0.0143541	0.0271132	0.0446571	0.0239234	0.0406699	0.0661882	0.123604	0.0366826	0.0988836	0.0709729	0.0374801	0.0813397	0.0239234	0.0287081	0.0350877	0.023126	0.015949	0.0542265	0.0877193	0.0342903	0.0733652	0.0446571	0.0669856	0.0318979
PTPRE	ENST00000254667.8	full-splice_match	1	0	0	5289	2100	237	2952	0.467385	0.528347	0.726891	0.403117	0.0500715	0.0443491	0.0658083	0.0314735	0.0529328	0.0500715	0.037196	0.0500715	0.0701001	0.0629471	0.0686695	0.0357654	0.0257511	0.0500715	0.0515021	0.0343348	0.0629471	0.0529328	0.0886981	0.0586552	0.0701001	0.0472103	0.0472103	0.0472103	0.0400572	0.0271817	0.037196	0.0228898	0.0243205	0.0429185	0.0729614	0.0386266	0.0643777	0.0572246	0.0729614	0.0486409
CARD6	ENST00000254691.10	full-splice_match	1	0	0	4038	3111	16	911	0.447003	0.456592	0.411765	0.414929	0.0646718	0.0472973	0.0945946	0.0444015	0.0511583	0.0299228	0.00579151	0.03861	0.103282	0.0656371	0.0675676	0.0540541	0.0289575	0.03861	0.0617761	0.0415058	0.0579151	0.0318533	0.100386	0.042471	0.0666023	0.034749	0.00675676	0.0694981	0.00965251	0.00289575	0.00579151	0.00482625	0.0328185	0.0598456	0.0646718	0.0530888	0.0955598	0.0289575	0.0656371	0.0579151
RAP1GAP2	ENST00000254695.13	full-splice_match	1	0	0	6663	2190	90	4383	0.560108	0.57926	0.692308	0.547798	0.0260631	0.0315501	0.0754458	0.0192044	0.0644719	0.0562414	0.0329218	0.0205761	0.0658436	0.0823045	0.0809328	0.0397805	0.00548697	0.0493827	0.0452675	0.0219479	0.0644719	0.0617284	0.101509	0.0562414	0.0973937	0.0672154	0.042524	0.0644719	0.0356653	0.0219479	0.0466392	0.0219479	0.0137174	0.0562414	0.0617284	0.0315501	0.0562414	0.0617284	0.090535	0.0384088
UTP3	ENST00000254803.4	full-splice_match	1	0	0	2020	1437	146	437	0.444059	0.477019	0.585034	0.28833	0.0878661	0.0292887	0.123431	0.039749	0.0376569	0.0334728	0.0209205	0.0334728	0.115063	0.0648536	0.117155	0.0481172	0.0188285	0.041841	0.0543933	0.0460251	0.0606695	0.0334728	0.0648536	0.0230126	0.0502092	0.0251046	0.0230126	0.0355649	0.0292887	0.0146444	0.0209205	0.0188285	0.039749	0.0230126	0.0606695	0.0292887	0.106695	0.0376569	0.123431	0.0774059
WBP2	ENST00000254806.8	full-splice_match	1	0	0	1859	783	38	1038	0.575578	0.579284	0.512821	0.575145	0.0153846	0.0346154	0.0884615	0.0269231	0.0461538	0.0730769	0.0269231	0.0346154	0.0461538	0.0692308	0.0576923	0.0346154	0.0115385	0.05	0.0807692	0.0192308	0.0692308	0.0576923	0.0807692	0.0615385	0.111538	0.0846154	0.0538462	0.0923077	0.0153846	0.0423077	0.0538462	0.0230769	0.0653846	0.0576923	0.0384615	0.0307692	0.0692308	0.0307692	0.0384615	0.0384615
KDM6B	ENST00000254846.9	full-splice_match	1	0	0	6713	5046	389	1278	0.624013	0.642418	0.630769	0.549296	0.0124926	0.0339084	0.0458061	0.00951814	0.0345033	0.0898275	0.0220107	0.0327186	0.0416419	0.0928019	0.0690065	0.0315289	0.00654372	0.0327186	0.0226056	0.0113028	0.0392623	0.0868531	0.106484	0.0350982	0.121951	0.108864	0.0547293	0.092207	0.0285544	0.0404521	0.0499703	0.0202261	0.0172516	0.0606782	0.10351	0.0362879	0.0446163	0.0327186	0.0701963	0.0196312
MATN2	ENST00000254898.7	full-splice_match	1	0	0	4133	2868	250	1015	0.483668	0.511336	0.717131	0.347783	0.0450262	0.0502618	0.0732984	0.0408377	0.0586387	0.0418848	0.0335079	0.0429319	0.0795812	0.0439791	0.0596859	0.0376963	0.0219895	0.0376963	0.0638743	0.0356021	0.0617801	0.0544503	0.0743455	0.0534031	0.0722513	0.0335079	0.0251309	0.0586387	0.0209424	0.0146597	0.0282723	0.0230366	0.0282723	0.0513089	0.0879581	0.0387435	0.0816754	0.0554974	0.0649215	0.0471204
NIP7	ENST00000254941.6	full-splice_match	1	0	0	1887	399	33	1455	0.401696	0.502513	0.558824	0.370447	0.0378788	0.0227273	0.0833333	0.0454545	0.0530303	0.0681818	0.0227273	0.0530303	0.0909091	0.0454545	0.0151515	0.0227273	0.030303	0.0227273	0.0606061	0.0606061	0.0681818	0.0606061	0.030303	0.0454545	0.0378788	0.030303	0.0530303	0.0378788	0.030303	0.0151515	0.0454545	0.030303	0.030303	0.00757576	0.0833333	0.0378788	0.0757576	0.0833333	0.0530303	0.0378788
TERF2	ENST00000254942.8	full-splice_match	1	0	0	2996	1626	36	1334	0.510681	0.553846	0.621622	0.455022	0.0573013	0.0480591	0.090573	0.0351201	0.0425139	0.0462107	0.0240296	0.038817	0.0739372	0.0813309	0.0702403	0.0332717	0.0147874	0.0332717	0.0425139	0.0332717	0.0609982	0.0369686	0.0924214	0.025878	0.0720887	0.0499076	0.0425139	0.038817	0.025878	0.0351201	0.077634	0.012939	0.012939	0.0369686	0.0757856	0.038817	0.0979667	0.0443623	0.0665434	0.0425139
JAG1	ENST00000254958.10	full-splice_match	1	0	0	5940	3654	469	1817	0.495791	0.53983	0.602128	0.379747	0.0394412	0.0665571	0.0476582	0.0468365	0.0657354	0.0509449	0.0386196	0.0476582	0.0484799	0.0394412	0.0410846	0.0476582	0.0205423	0.0353328	0.0575185	0.0287592	0.0682005	0.0517666	0.0755957	0.0353328	0.0649137	0.0484799	0.032046	0.072309	0.0279376	0.0221857	0.0493016	0.0205423	0.0221857	0.0353328	0.109285	0.0369762	0.0632703	0.0575185	0.0484799	0.0386196
HSPA12B	ENST00000254963.7	full-splice_match	1	0	0	3133	2058	127	948	0.645069	0.661643	0.78125	0.590717	0.0160584	0.0145985	0.0350365	0.010219	0.0248175	0.0627737	0.0262774	0.0291971	0.0335766	0.0846715	0.0642336	0.0218978	0.00291971	0.0321168	0.0321168	0.00729927	0.0277372	0.0554745	0.0832117	0.0394161	0.0686131	0.070073	0.0948905	0.0671533	0.049635	0.10219	0.0715328	0.0408759	0.0233577	0.0525547	0.0934307	0.0467153	0.0291971	0.0510949	0.0759124	0.0189781
RIN2	ENST00000255006.12	full-splice_match	1	0	0	4440	2685	232	1523	0.498198	0.559613	0.635193	0.369009	0.0391499	0.0436242	0.0704698	0.0234899	0.0559284	0.0637584	0.0257271	0.0313199	0.0637584	0.0782998	0.0693512	0.0357942	0.0134228	0.0313199	0.0548098	0.0290828	0.0548098	0.0469799	0.0928412	0.0592841	0.0749441	0.0637584	0.0436242	0.0693512	0.0279642	0.0313199	0.049217	0.0111857	0.0201342	0.0615213	0.0782998	0.049217	0.0715884	0.0659955	0.0782998	0.0279642
HAPLN2	ENST00000255039.6	full-splice_match	1	0	0	1650	1020	286	344	0.666061	0.685967	0.543554	0.709302	0.00589971	0.0176991	0.0265487	0.00884956	0.0117994	0.0737463	0.079646	0.0265487	0.0147493	0.0471976	0.0707965	0.020649	0	0.0383481	0.0117994	0.00589971	0.0353982	0.0648968	0.0501475	0.0294985	0.0884956	0.079646	0.0884956	0.0707965	0.0560472	0.100295	0.0973451	0.0324484	0.0412979	0.0530973	0.0943953	0.0383481	0.0147493	0.0619469	0.0678466	0.0147493
IGHMBP2	ENST00000255078.8	full-splice_match	1	0	0	3914	2979	62	873	0.592233	0.590329	0.761905	0.586483	0.03125	0.0302419	0.0665323	0.0120968	0.0433468	0.0514113	0.0332661	0.03125	0.0675403	0.0866935	0.0846774	0.0372984	0.0131048	0.03125	0.0252016	0.0191532	0.0362903	0.0554435	0.116935	0.03125	0.0887097	0.0614919	0.0423387	0.0685484	0.0322581	0.0332661	0.0453629	0.0211694	0.0110887	0.0504032	0.111895	0.0352823	0.0594758	0.0564516	0.0846774	0.0332661
TESMIN	ENST00000255087.10	full-splice_match	1	0	0	2535	1524	140	871	0.525049	0.529875	0.808511	0.470723	0.0493097	0.0532544	0.0769231	0.061144	0.0394477	0.0295858	0.025641	0.0493097	0.0571992	0.0512821	0.0808679	0.0295858	0.0157791	0.0414201	0.0473373	0.0493097	0.0887574	0.0335306	0.0650888	0.035503	0.0710059	0.0532544	0.0394477	0.0571992	0.0276134	0.0315582	0.0414201	0.0197239	0.0276134	0.0433925	0.0729783	0.0473373	0.0710059	0.0295858	0.0650888	0.035503
PABPC1L	ENST00000255136.8	full-splice_match	1	0	0	2126	1842	84	200	0.587959	0.595872	0.776471	0.435	0.0163132	0.0342577	0.050571	0.0163132	0.0489396	0.0619902	0.0309951	0.0293638	0.0440457	0.0783034	0.0734095	0.0293638	0.0114192	0.0326264	0.0685155	0.0130506	0.050571	0.0522023	0.0978793	0.0619902	0.107667	0.0652529	0.0424144	0.0619902	0.0228385	0.045677	0.0554649	0.0261011	0.0228385	0.0570962	0.0668842	0.0391517	0.0489396	0.0554649	0.0685155	0.0293638
ZSWIM3	ENST00000255152.3	full-splice_match	1	0	0	2776	2088	212	476	0.523055	0.535218	0.600939	0.434874	0.0316547	0.0388489	0.0834532	0.018705	0.0676259	0.0589928	0.0129496	0.0417266	0.076259	0.0776978	0.0705036	0.0359712	0.0100719	0.0359712	0.0446043	0.0215827	0.0647482	0.0532374	0.0978417	0.0532374	0.0820144	0.0359712	0.0316547	0.0848921	0.0158273	0.0201439	0.018705	0.0158273	0.0302158	0.0618705	0.0877698	0.0633094	0.0589928	0.0561151	0.0633094	0.028777
DMGDH	ENST00000255189.8	full-splice_match	1	0	0	3173	2598	54	521	0.433659	0.459761	0.763636	0.268714	0.0786127	0.0635838	0.0786127	0.0531792	0.0543353	0.033526	0.0150289	0.0508671	0.0635838	0.0427746	0.0589595	0.0439306	0.0381503	0.0612717	0.0682081	0.0404624	0.065896	0.033526	0.0624277	0.0520231	0.0462428	0.0150289	0.016185	0.0520231	0.0127168	0.016185	0.016185	0.00578035	0.0323699	0.0346821	0.100578	0.0416185	0.0971098	0.0346821	0.0473988	0.049711
SYT4	ENST00000255224.8	full-splice_match	1	0	0	3936	1275	209	2452	0.378811	0.434066	0.571429	0.333605	0.0754717	0.0353774	0.103774	0.0754717	0.0330189	0.0448113	0.00707547	0.0353774	0.0919811	0.0448113	0.0283019	0.0636792	0.0330189	0.0636792	0.0613208	0.0424528	0.0683962	0.0330189	0.0589623	0.0400943	0.0589623	0.0353774	0.0141509	0.0518868	0.0165094	0	0.0117925	0.00471698	0.0259434	0.0495283	0.0613208	0.0636792	0.110849	0.0283019	0.0636792	0.0636792
USPL1	ENST00000255304.9	full-splice_match	1	0	0	4894	3276	205	1413	0.422354	0.394809	0.529126	0.47063	0.0944088	0.0485793	0.0815765	0.0843263	0.0632447	0.0384968	0.00549954	0.0531622	0.0815765	0.0494959	0.0348304	0.0568286	0.0531622	0.0439963	0.0650779	0.0687443	0.0504125	0.0458295	0.0806599	0.0494959	0.0586618	0.0238313	0.00458295	0.0430797	0.00824931	0.00366636	0.00458295	0.0100825	0.0329973	0.0449129	0.060495	0.0595784	0.0999083	0.0329973	0.0311641	0.0439963
XPO4	ENST00000255305.11	full-splice_match	1	0	0	9857	3453	8	6396	0.375571	0.422654	0.555556	0.349906	0.053913	0.0504348	0.086087	0.0582609	0.0608696	0.0347826	0.00782609	0.0521739	0.0826087	0.0634783	0.0365217	0.0686957	0.0382609	0.0391304	0.0591304	0.0686957	0.0747826	0.0417391	0.0878261	0.046087	0.0495652	0.0156522	0.00521739	0.0452174	0.0113043	0.00869565	0.0121739	0.00695652	0.0313043	0.0417391	0.066087	0.0652174	0.0782609	0.0295652	0.0469565	0.0608696
CHRM3	ENST00000255380.8	full-splice_match	1	0	0	8780	1770	779	6231	0.431093	0.520633	0.530769	0.393195	0.0322581	0.0611205	0.0662139	0.0203735	0.0662139	0.0594228	0.0271647	0.0458404	0.0560272	0.0848896	0.040747	0.0322581	0.0169779	0.0543294	0.0373514	0.0237691	0.0797963	0.0475382	0.0865874	0.0645161	0.0713073	0.0288625	0.0356537	0.0747029	0.0339559	0.0152801	0.0288625	0.0186757	0.0237691	0.0679117	0.0882852	0.0679117	0.0526316	0.0526316	0.0560272	0.0305603
LGR6	ENST00000255432.11	full-splice_match	1	0	0	3406	2745	84	577	0.576629	0.60277	0.529412	0.459272	0.0153173	0.0393873	0.0295405	0.0196937	0.0393873	0.0601751	0.0153173	0.0382932	0.0350109	0.0623632	0.0623632	0.0273523	0.00765864	0.0459519	0.0350109	0.0131291	0.047046	0.0459519	0.0864333	0.0426696	0.0765864	0.0722101	0.0404814	0.125821	0.0131291	0.0284464	0.0317287	0.0175055	0.0251641	0.0754923	0.149891	0.0557987	0.0350109	0.0459519	0.059081	0.0295405
DCLK1	ENST00000255448.8	full-splice_match	1	0	0	5703	2187	212	3304	0.460109	0.506862	0.769953	0.409201	0.0398352	0.0412088	0.0837912	0.0357143	0.0343407	0.0576923	0.0302198	0.0412088	0.0782967	0.0728022	0.0563187	0.0384615	0.0357143	0.043956	0.0618132	0.0384615	0.0576923	0.0535714	0.0796703	0.0480769	0.0865385	0.0357143	0.0315934	0.0398352	0.0357143	0.021978	0.0302198	0.0206044	0.0178571	0.0384615	0.0769231	0.0412088	0.081044	0.0384615	0.0659341	0.0741758
CCNA1	ENST00000255465.7	full-splice_match	1	0	0	1730	1395	127	208	0.481503	0.492826	0.625	0.317308	0.0431034	0.0366379	0.0732759	0.0323276	0.0603448	0.049569	0.0107759	0.049569	0.0732759	0.0732759	0.0560345	0.0581897	0.0344828	0.0409483	0.049569	0.0301724	0.0538793	0.0431034	0.103448	0.0344828	0.0452586	0.0431034	0.0215517	0.0581897	0.0215517	0.00862069	0.0107759	0.012931	0.0301724	0.0301724	0.103448	0.0668103	0.0732759	0.0474138	0.0646552	0.049569
MORC4	ENST00000255495.7	full-splice_match	1	0	0	2940	2700	109	131	0.471088	0.461652	0.718182	0.458015	0.0678532	0.0522803	0.0978865	0.0678532	0.0533927	0.057842	0.0133482	0.028921	0.110122	0.0533927	0.0656285	0.0367075	0.0389321	0.0422692	0.0556174	0.0489433	0.0700779	0.0311457	0.080089	0.0389321	0.0823137	0.0311457	0.0200222	0.0567297	0.0133482	0.0144605	0.0177976	0.00778643	0.028921	0.0322581	0.0678532	0.0500556	0.111235	0.028921	0.0689655	0.0489433
RNF128	ENST00000255499.3	full-splice_match	1	0	0	2803	1284	213	1306	0.418837	0.512081	0.67757	0.284839	0.0538642	0.0515222	0.0632319	0.058548	0.0491803	0.0421546	0.0398126	0.0234192	0.0515222	0.0327869	0.0491803	0.0351288	0.0257611	0.0468384	0.058548	0.0515222	0.0749415	0.030445	0.0421546	0.0562061	0.0351288	0.0444965	0.0515222	0.0491803	0.0163934	0.0468384	0.0491803	0.0234192	0.0234192	0.0327869	0.0796253	0.0421546	0.0679157	0.0374707	0.0515222	0.0327869
PCDH19	ENST00000255531.8	full-splice_match	1	0	0	7937	3303	0	4634	0.456092	0.569352	0	0.375486	0.0190909	0.0481818	0.0509091	0.0336364	0.0427273	0.0627273	0.0490909	0.0463636	0.0563636	0.0590909	0.05	0.0290909	0.0118182	0.0527273	0.0436364	0.0236364	0.0790909	0.0481818	0.0672727	0.0418182	0.0681818	0.0545455	0.05	0.0690909	0.05	0.0490909	0.0427273	0.0327273	0.0345455	0.0618182	0.0927273	0.0390909	0.0445455	0.07	0.0590909	0.0381818
C17orf80	ENST00000255557.8	full-splice_match	1	0	0	2163	1641	370	152	0.472492	0.440854	0.654987	0.368421	0.0952381	0.0421245	0.115385	0.0604396	0.0494505	0.043956	0.014652	0.0567766	0.106227	0.0586081	0.0549451	0.0604396	0.0238095	0.0531136	0.0512821	0.0457875	0.0787546	0.03663	0.0915751	0.0457875	0.0787546	0.029304	0.003663	0.0494505	0.010989	0.00549451	0.00549451	0.0128205	0.040293	0.0421245	0.0567766	0.043956	0.0860806	0.0421245	0.0622711	0.0494505
SLC39A11	ENST00000255559.8	full-splice_match	1	0	0	2732	1005	89	1638	0.498902	0.579681	0.666667	0.440171	0.00898204	0.011976	0.0329341	0.0179641	0.0209581	0.0239521	0.0269461	0.0299401	0.0658683	0.0568862	0.0479042	0.0299401	0.011976	0.0508982	0.0419162	0.0209581	0.00898204	0.0389222	0.0808383	0.0449102	0.0568862	0.0479042	0.0239521	0.0988024	0.0179641	0.011976	0.0389222	0.0239521	0.0269461	0.0479042	0.125749	0.0928144	0.0508982	0.0359281	0.0658683	0.0449102
PDE6B	ENST00000255622.10	full-splice_match	1	0	0	3280	2559	43	678	0.555183	0.576622	0.681818	0.466077	0.0234742	0.0375587	0.0739437	0.0199531	0.056338	0.0633803	0.0492958	0.0340376	0.0633803	0.0633803	0.0704225	0.0340376	0.00352113	0.0422535	0.0504695	0.0199531	0.0598592	0.0575117	0.0657277	0.0481221	0.0809859	0.0422535	0.0410798	0.0751174	0.0516432	0.0305164	0.0492958	0.0328638	0.0211268	0.0399061	0.10446	0.0316901	0.0692488	0.07277	0.0856808	0.0399061
HSPBP1	ENST00000255631.9	full-splice_match	1	0	0	1768	1077	311	380	0.646493	0.664498	0.653846	0.589474	0.00837989	0.0195531	0.0335196	0.00837989	0.0307263	0.0418994	0.027933	0.0139665	0.0530726	0.103352	0.0837989	0.0223464	0	0.0167598	0.0391061	0.00558659	0.027933	0.0391061	0.122905	0.0363128	0.0670391	0.0502793	0.0530726	0.0865922	0.0391061	0.0391061	0.075419	0.0167598	0.0027933	0.0586592	0.162011	0.0251397	0.0307263	0.0502793	0.0977654	0.0167598
CSNK1G2	ENST00000255641.13	full-splice_match	1	0	0	2895	1245	512	1138	0.650777	0.62299	0.738791	0.641476	0.0289855	0.031401	0.0676329	0.0217391	0.0483092	0.0748792	0.0507246	0.0362319	0.057971	0.0845411	0.0531401	0.0169082	0.00483092	0.0483092	0.0434783	0.00483092	0.0676329	0.0628019	0.057971	0.0386473	0.0797101	0.0483092	0.0821256	0.0603865	0.0603865	0.0628019	0.089372	0.0241546	0.031401	0.0434783	0.0772947	0.0338164	0.0507246	0.0748792	0.089372	0.02657
[truncated: 36,938 more rows]
[truncated: 51 more columns]

## Sheet: S4.ESC_DTE
gene	txID	cluster	pval	R2	cyto	mono	poll	polh	mono_L2FC	poll_L2FC	polh_L2FC	mono_sig	poll_sig	polh_sig
S100PBP	TCONS_00000370	Cyto	1	0	1416.83	1100.02	1198.36	1084.7	-0.365137	-0.241605	-0.385371	0	0	0
[truncated: 33,164 more rows]

## Sheet: S5.NPC_DTE
gene	txID	cluster	pval	R2	coding	NMD	cyto	mono	poll	polh	mono_L2FC	poll_L2FC	polh_L2FC	mono_sig	poll_sig	polh_sig
[truncated: 31,880 more rows]

[truncated: 6 more sheets: S6.ESC_DIU, S7.NPC_DIU, S8.ESC_AS, S9.NPC_AS, S10.FASE_motif, S11.divergentDIU_motif]
